# Supplementary material for: Reciprocal interaction between SIRT6 and APC/C regulates genomic stability
Source: PubMed Central journal article supplement (PMC8270898; doi:10.1038/s41598-021-93684-w), 2021-07-09

## Supplementary Materials

For the article entitled:

Reciprocal interaction between SIRT6 and APC/C regulates genomic  
stability

Helin Wang<sup>1</sup>, Kangze Feng<sup>1</sup>, Qingtao Wang<sup>2</sup>, Haiteng Deng<sup>1, \*</sup>

<sup>1</sup>MOE Key Laboratory of Bioinformatics, Center for Synthetic and Systematic Biology,  
School of Life Sciences, Tsinghua University

<sup>2</sup>Beijing Chaoyang Hospital Affiliated to Capital Medical University, Beijing, 100043,  
China;

Contact:

Helin wang: whl0818@live.cn

Kangze Feng: fkz\_2008@126.com

Qingtao Wang: wqt36@163.com

Haiteng Deng: dht@mail.tsinghua.edu.cn

\* Correspondence: Haiteng Deng

## Supplementary figures

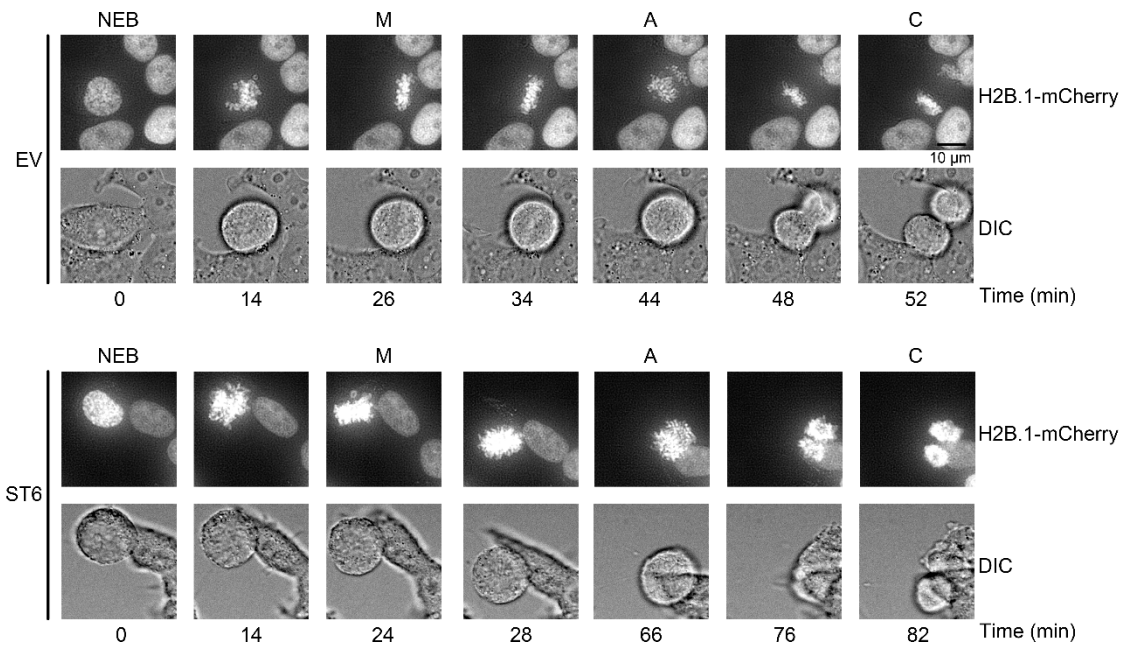

**Figure S1.** Selected frames from time-lapse movies of representative 293T H2B.1-mCherry transfected with SIRT6 overexpression lentivirus or empty vehicle. NEB, nuclear envelope breakdown; M, metaphase; A, anaphase. Images were viewed with ImageJ.<sup>30</sup>

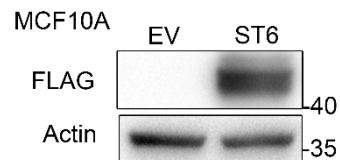

**Figure S2.** Western blot validation of SIRT6 overexpressing MCF10A cell line. Anti-FLAG antibody was used to blot expression of SIRT6-FLAG protein. Actin was used as a loading control.



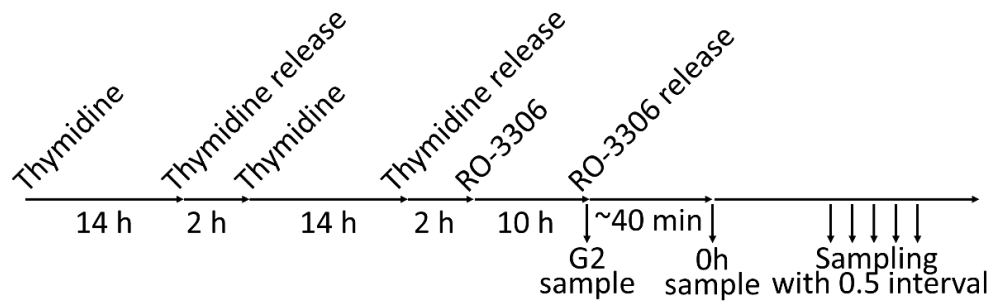

**Figure S4.** Procedure of cell treatments for preparing samples of figure 4A and S5. Detailed method was described in materials and methods.

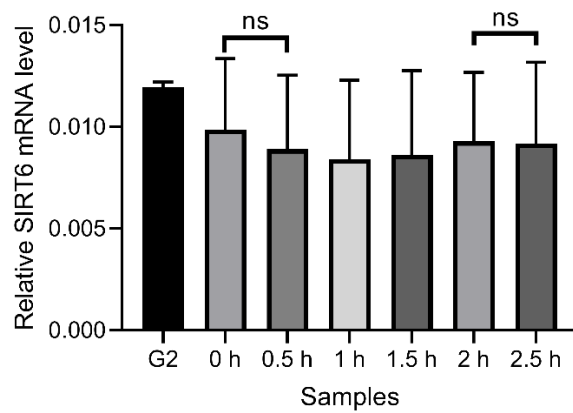

**Figure S5.** Quantitative real-time PCR quantifying the mRNA levels of SIRT6 in cells collected following the procedure shown in Figure S4.

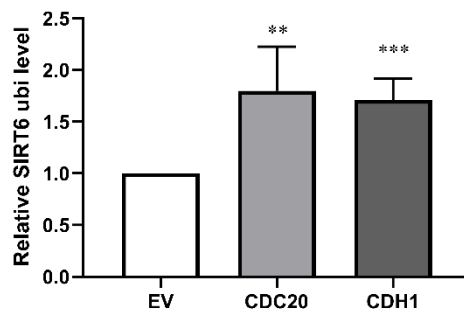

**Figure S6.** Quantification analysis of relative SIRT6 ubiquitination level in Figure 4c. Grayscale band volume was measured with Image Lab 5.2.1 (Bio-Rad Laboratories, Inc.).

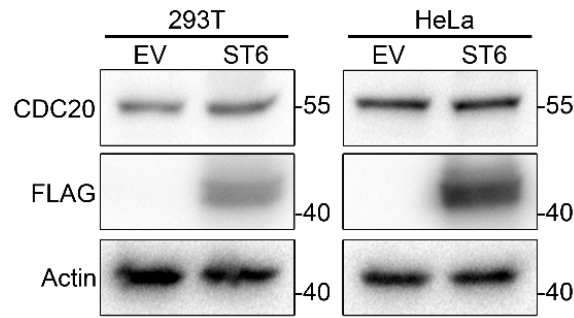

**Figure S7.** Control and SIRT6-FLAG overexpressing 293T and HeLa cells were subjected to western blotting with the indicated antibodies. Actin was used as a loading control.

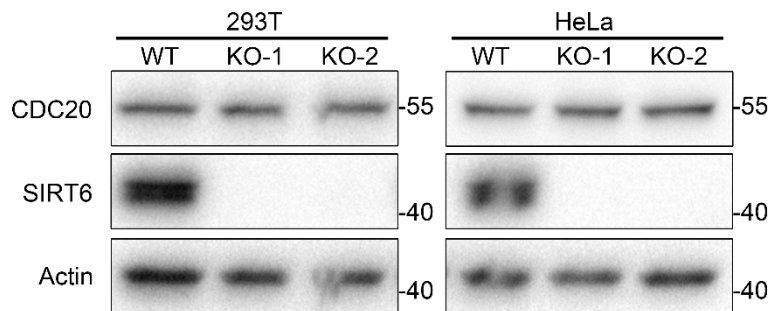

**Figure S8.** Level of CDC20 protein was detected by western blotting in wild-type and SIRT6 knockout 293T and HeLa cells. Actin was used as a loading control.

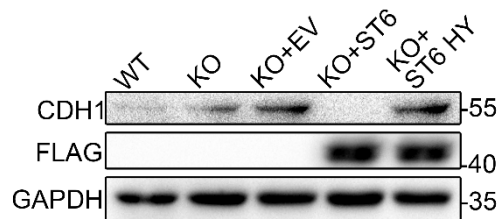

**Figure S9.** Wild-type 293T cells, 293T SIRT6 knock-out cells, and knock-out cells transfected with empty vehicle (KO+EV), wild-type SIRT6 (KO+ST6), or inactive mutation SIRT6 H133Y (KO+ST6 HY) were subjected to western blotting using anti-CDH1 antibody. Anti-FLAG antibody was used to detect SIRT6-FLAG expression. GAPDH was used as a loading control.

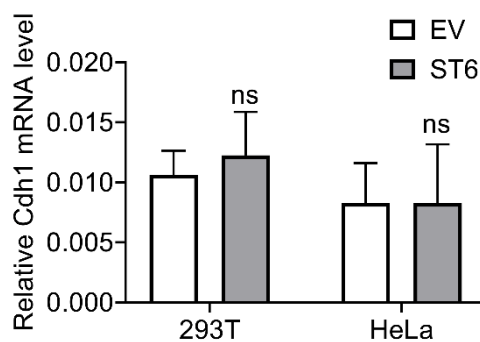

**Figure S10.** Quantitative real-time PCR quantifying the mRNA levels of Cdh1 in 293T and HeLa cells transfected with SIRT6 overexpressing lentivirus (ST6) or empty vehicle (EV).

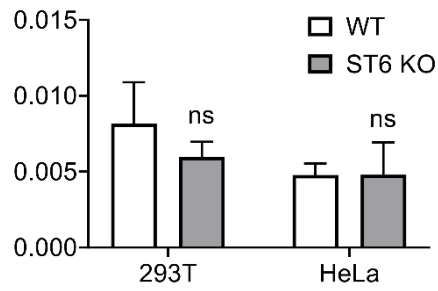

**Figure S11.** Quantitative real-time PCR quantifying the mRNA levels of Cdh1 in wild-type 293T and HeLa cells (WT) or SIRT6 knockout cells (KO).

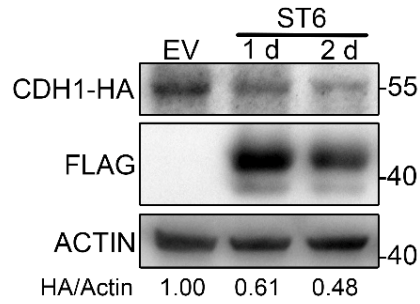

**Figure S12.** 293T cells stably expressing ectopic CDH1-HA under the CMV promoter were transfected with empty vehicle (EV) or SIRT6 overexpressing plasmid (ST6). CDH1-HA levels were detected using anti-HA antibody. Anti-FLAG antibody was used to detect the expression of SIRT6-FLAG, and actin was used as a loading control.

## Supplementary Tables

**Table S1.** Candidate interacting proteins identified in 293T SIRT6-FLAG AP-MS experiment

| Accession  | Gene name | $\Sigma$ Coverage | Score ST6 | Coverage ST6 | Unique peptide | # AAs | MW [kDa] | SAINT score |
|------------|-----------|-------------------|-----------|--------------|----------------|-------|----------|-------------|
| C9J4Z3     | RPL37A    | 44.12             | 61.24     | 44.12        | 2              | 68    | 7.62     | 1           |
| O15027-5   | SEC16A    | 34.39             | 284.67    | 33.71        | 2              | 2201  | 235.61   | 1           |
| O60814     | HIST1H2BK | 26.98             | 42.29     | 26.98        | 2              | 126   | 13.88    | 0.98        |
| P04908     | HIST1H2AB | 36.15             | 74.44     | 36.15        | 2              | 130   | 14.13    | 1           |
| P62266     | RPS23     | 37.06             | 149.23    | 37.06        | 2              | 143   | 15.80    | 1           |
| Q5T1V6-2   | DDX59     | 7.24              | 399.47    | 7.24         | 2              | 580   | 64.53    | 1           |
| Q8WWM7     | ATXN2L    | 32.19             | 343.31    | 32.19        | 2              | 1075  | 113.30   | 1           |
| Q96KK5     | HIST1H2AH | 36.72             | 142.84    | 36.72        | 2              | 128   | 13.90    | 1           |
| Q96RR5     | HCA90     | 51.47             | 345.61    | 51.47        | 2              | 783   | 89.34    | 1           |
| Q9NYF8-2   | BCLAF1    | 25.82             | 75.99     | 14.16        | 2              | 918   | 105.88   | 1           |
| Q9UN86-2   | G3BP2     | 49.89             | 372.43    | 49.89        | 2              | 449   | 50.79    | 1           |
| P63167     | DYNLL1    | 65.17             | 48.77     | 65.17        | 3              | 89    | 10.36    | 0.99        |
| Q3MHD2     | LSM12     | 26.15             | 40.89     | 26.15        | 3              | 195   | 21.69    | 1           |
| Q8IUE6     | HIST2H2AB | 35.38             | 51.75     | 35.38        | 3              | 130   | 13.99    | 1           |
| A0A075B7F8 | POM121C   | 24.98             | 276.74    | 24.98        | 4              | 1229  | 125.02   | 1           |
| E9PQ01     | PCF11     | 44.94             | 553.58    | 44.94        | 4              | 999   | 112.24   | 1           |
| O94808     | GFPT2     | 15.98             | 40.84     | 15.98        | 4              | 682   | 76.88    | 1           |
| P30154-4   | PPP2R1B   | 26.08             | 60.05     | 26.08        | 4              | 556   | 61.27    | 1           |
| J3KNL6     | SEC16A    | 34.92             | 306.75    | 34.28        | 5              | 2357  | 251.74   | 1           |
| P36954     | POLR2I    | 56.8              | 60.29     | 56.8         | 5              | 125   | 14.51    | 1           |
| P49790     | NUP153    | 57.76             | 1167.52   | 57.76        | 5              | 1475  | 153.84   | 1           |
| P67870     | CSNK2B    | 26.98             | 72.31     | 26.98        | 5              | 215   | 24.93    | 1           |
| Q9Y221     | NIP7      | 51.11             | 54.35     | 51.11        | 5              | 180   | 20.45    | 1           |
| E9PCY5     | TOP2B     | 14.43             | 68.12     | 14.43        | 6              | 1150  | 130.40   | 1           |
| O14497-2   | ARID1A    | 6                 | 41.94     | 4.74         | 6              | 2068  | 218.20   | 1           |
| P35637-2   | FUS       | 19.05             | 139.90    | 19.05        | 6              | 525   | 53.32    | 1           |
| P52435     | POLR2J    | 40.17             | 46.32     | 40.17        | 6              | 117   | 13.29    | 1           |
| Q13838     | DDX39B    | 36.21             | 61.14     | 32.94        | 6              | 428   | 48.96    | 1           |
| Q8NFH5-2   | NUP35     | 25.57             | 42.71     | 25.57        | 6              | 309   | 33.10    | 1           |
| Q96HA1     | POM121    | 24.34             | 290.32    | 24.34        | 6              | 1249  | 127.64   | 1           |
| Q9BRR8     | GPATCH1   | 13.1              | 63.73     | 13.1         | 6              | 931   | 103.28   | 1           |
| Q9H2G4     | TSPYL2    | 9.96              | 47.86     | 9.96         | 6              | 693   | 79.39    | 0.92        |
| D6RIY6     | EXOSC9    | 25.53             | 64.81     | 25.53        | 7              | 423   | 46.95    | 0.98        |
| O15514     | POLR2D    | 41.55             | 42.09     | 41.55        | 7              | 142   | 16.30    | 1           |
| O43159     | RRP8      | 21.49             | 53.26     | 21.49        | 7              | 456   | 50.68    | 1           |
| P15927     | RPA2      | 40.37             | 74.72     | 37.41        | 7              | 270   | 29.23    | 1           |
| P27348     | YWHAQ     | 43.27             | 40.87     | 43.27        | 7              | 245   | 27.75    | 1           |
| P30291-2   | WEE1      | 27.31             | 47.09     | 27.31        | 7              | 432   | 49.04    | 1           |

Table S1 continued

| Accession | Gene name | $\Sigma$ Coverage | Score ST6 | Coverage ST6 | Unique peptide | # AAs | MW [kDa] | SAINT score |
|-----------|-----------|-------------------|-----------|--------------|----------------|-------|----------|-------------|
| P52294    | KPNA1     | 34.76             | 98.89     | 34.57        | 7              | 538   | 60.18    | 1           |
| P55795    | HNRNPH2   | 40.98             | 199.61    | 40.98        | 7              | 449   | 49.23    | 0.99        |
| Q16637-4  | SMN1      | 33.2              | 58.39     | 33.2         | 7              | 250   | 27.12    | 1           |
| Q5MIZ7-2  | SMEK2     | 23.13             | 83.53     | 23.13        | 7              | 817   | 93.66    | 1           |
| Q5QJE6    | DNTTIP2   | 14.81             | 70.74     | 14.81        | 7              | 756   | 84.42    | 1           |
| Q96FX7    | TRMT61A   | 41.87             | 42.70     | 41.87        | 7              | 289   | 31.36    | 1           |
| Q9BUF5    | TUBB6     | 48.88             | 219.44    | 39.24        | 7              | 446   | 49.83    | 1           |
| Q9BYG3    | NIFK      | 30.03             | 45.74     | 30.03        | 7              | 293   | 34.20    | 0.99        |
| Q9NQG5    | RPRD1B    | 47.24             | 134.43    | 47.24        | 7              | 326   | 36.88    | 1           |
| F5GWD3    | GTF2H3    | 41.86             | 49.08     | 41.86        | 8              | 258   | 28.89    | 1           |
| J3KPF0    | HECTD4    | 5.5               | 42.05     | 5.5          | 8              | 4272  | 468.36   | 1           |
| M0R0F0    | RPS5      | 31                | 266.18    | 31           | 8              | 200   | 22.38    | 1           |
| O43818    | RRP9      | 30.95             | 43.39     | 27.79        | 8              | 475   | 51.81    | 1           |
| P07992    | ERCC1     | 37.37             | 48.32     | 37.37        | 8              | 297   | 32.54    | 1           |
| P55769    | NHP2L1    | 51.56             | 52.20     | 51.56        | 8              | 128   | 14.16    | 0.98        |
| P62487    | POLR2G    | 40.7              | 45.83     | 40.7         | 8              | 172   | 19.28    | 1           |
| Q13185    | CBX3      | 50.82             | 56.28     | 50.82        | 8              | 183   | 20.80    | 1           |
| Q14643-4  | ITPR1     | 8.65              | 70.64     | 8.65         | 8              | 2695  | 306.58   | 1           |
| Q15906    | VPS72     | 40.93             | 53.50     | 38.74        | 8              | 364   | 40.57    | 1           |
| Q6P1K8    | GTF2H2C   | 33.16             | 41.04     | 30.89        | 8              | 395   | 44.42    | 1           |
| Q6P2C8    | MED27     | 32.8              | 44.31     | 32.8         | 8              | 311   | 35.41    | 1           |
| Q8NFH3    | NUP43     | 32.63             | 80.89     | 32.63        | 8              | 380   | 42.12    | 1           |
| Q8NFH4    | NUP37     | 33.74             | 66.39     | 33.74        | 8              | 326   | 36.68    | 1           |
| Q9BYN8    | MRPS26    | 22.44             | 47.38     | 22.44        | 8              | 205   | 24.20    | 1           |
| Q9GZN1    | ACTR6     | 34.85             | 42.01     | 34.85        | 8              | 396   | 45.78    | 1           |
| Q9NY61    | AATF      | 23.93             | 51.09     | 23.93        | 8              | 560   | 63.09    | 1           |
| Q9ULX6-2  | AKAP8L    | 21.54             | 82.96     | 21.54        | 8              | 585   | 65.19    | 1           |
| E9PEI0    | CDCA2     | 18.65             | 67.04     | 18.65        | 9              | 1008  | 110.94   | 1           |
| O00139-2  | KIF2A     | 14.55             | 48.93     | 14.55        | 9              | 660   | 75.00    | 1           |
| O60684    | KPNA6     | 45.34             | 75.13     | 45.15        | 9              | 536   | 59.99    | 1           |
| P31943    | HNRNPH1   | 48.11             | 1000.28   | 48.11        | 9              | 449   | 49.20    | 1           |
| P37108    | SRP14     | 41.91             | 60.50     | 41.91        | 9              | 136   | 14.56    | 0.99        |
| Q5T5Y3    | CAMSAP1   | 11.17             | 43.40     | 11.17        | 9              | 1602  | 177.86   | 1           |
| Q86WP2-3  | GPBP1     | 34.41             | 72.20     | 34.41        | 9              | 465   | 52.41    | 1           |
| Q8TF76    | GSG2      | 20.3              | 45.00     | 20.3         | 9              | 798   | 88.44    | 1           |
| Q96CT7    | CCDC124   | 34.98             | 87.23     | 34.98        | 9              | 223   | 25.82    | 1           |
| Q96P16    | RPRD1A    | 50                | 146.83    | 50           | 9              | 312   | 35.70    | 1           |
| Q9HB71-3  | CACYBP    | 60                | 95.17     | 60           | 9              | 185   | 21.21    | 1           |
| Q9NPI1    | BRD7      | 20.89             | 51.64     | 20.89        | 9              | 651   | 74.09    | 1           |
| Q9NQT5    | EXOSC3    | 48                | 42.26     | 48           | 9              | 275   | 29.55    | 1           |



Table S1 continued

| Accession  | Gene name | $\Sigma$ Coverage | Score ST6 | Coverage ST6 | Unique peptide | # AAs | MW [kDa] | SAINT score |
|------------|-----------|-------------------|-----------|--------------|----------------|-------|----------|-------------|
| Q9NW75     | GPATCH2   | 24.43             | 52.67     | 24.43        | 9              | 528   | 58.91    | 1           |
| Q9UNF1     | MAGED2    | 20.3              | 45.43     | 16.34        | 9              | 606   | 64.91    | 1           |
| A0A075B6T1 | AMBRA1    | 16.28             | 47.45     | 16.28        | 10             | 1179  | 129.52   | 1           |
| A0A087X1A5 | STAU1     | 29.01             | 50.23     | 29.01        | 10             | 493   | 54.91    | 1           |
| G3V203     | RPL18     | 44.51             | 181.71    | 44.51        | 10             | 164   | 18.74    | 1           |
| G5E9A6     | USP11     | 18.48             | 41.68     | 18.48        | 10             | 920   | 104.96   | 1           |
| J3KMX2     | SMARCD2   | 32.68             | 73.24     | 32.68        | 10             | 456   | 52.21    | 1           |
| J3KNZ9     | FBRS      | 17.65             | 46.10     | 17.65        | 10             | 980   | 103.71   | 1           |
| O96019-2   | ACTL6A    | 43.41             | 103.33    | 43.41        | 10             | 387   | 43.21    | 1           |
| P30050     | RPL12     | 66.06             | 283.54    | 66.06        | 10             | 165   | 17.81    | 1           |
| P78362     | SRPK2     | 26.16             | 56.58     | 26.16        | 10             | 688   | 77.48    | 1           |
| Q14498-2   | RBM39     | 23.66             | 72.94     | 23.66        | 10             | 524   | 58.62    | 1           |
| Q15050     | RRS1      | 38.08             | 78.27     | 38.08        | 10             | 365   | 41.17    | 1           |
| Q71RC2-3   | LARP4     | 19.92             | 71.14     | 19.92        | 10             | 723   | 80.42    | 1           |
| Q8IWU2     | LMTK2     | 13.77             | 43.73     | 13.77        | 10             | 1503  | 164.80   | 1           |
| Q8TAQ2-2   | SMARCC2   | 20.62             | 154.39    | 19.91        | 10             | 1130  | 124.76   | 1           |
| Q8WXX5     | DNAJC9    | 45.38             | 66.42     | 45.38        | 10             | 260   | 29.89    | 0.92        |
| Q92615     | LARP4B    | 24.53             | 61.37     | 24.53        | 10             | 738   | 80.50    | 1           |
| Q96DT7     | ZBTB10    | 17.22             | 43.78     | 17.22        | 10             | 871   | 94.83    | 1           |
| Q96PV6-2   | LENG8     | 18.88             | 45.67     | 18.88        | 10             | 800   | 88.10    | 1           |
| Q96SK2-2   | TMEM209   | 36.96             | 59.84     | 36.96        | 10             | 560   | 62.75    | 1           |
| Q9H0S4     | DDX47     | 27.03             | 62.60     | 22.42        | 10             | 455   | 50.61    | 1           |
| Q9H0W8     | SMG9      | 25.77             | 54.62     | 25.77        | 10             | 520   | 57.61    | 1           |
| Q9NWT1     | PAK1IP1   | 25.77             | 47.40     | 23.47        | 10             | 392   | 43.94    | 1           |
| Q9NZJ5     | EIF2AK3   | 15.5              | 43.60     | 14.52        | 10             | 1116  | 125.14   | 0.98        |
| Q9UJX4     | ANAPC5    | 20.79             | 45.77     | 20.79        | 10             | 755   | 85.02    | 1           |
| B4DGU4     | CTNNB1    | 24.94             | 73.36     | 24.94        | 11             | 774   | 84.71    | 1           |
| F8WAJ0     | DDX31     | 21.85             | 55.92     | 21.85        | 11             | 746   | 83.46    | 1           |
| H0Y714     | IMP4      | 60.71             | 133.28    | 60.71        | 11             | 280   | 31.93    | 1           |
| O14641     | DVL2      | 25.82             | 85.35     | 25.82        | 11             | 736   | 78.90    | 1           |
| O43422     | PRKRIR    | 23.78             | 41.33     | 23.78        | 11             | 761   | 87.65    | 1           |
| P05387     | RPLP2     | 82.61             | 492.18    | 82.61        | 11             | 115   | 11.66    | 1           |
| P49750-3   | YLPM1     | 9.94              | 53.17     | 9.94         | 11             | 1862  | 209.35   | 1           |
| P62805     | HIST1H4A  | 61.17             | 120.30    | 61.17        | 11             | 103   | 11.36    | 1           |
| P62917     | RPL8      | 51.75             | 218.16    | 51.75        | 11             | 257   | 28.01    | 1           |
| Q13042     | CDC16     | 22.58             | 47.11     | 20.97        | 11             | 620   | 71.61    | 1           |
| Q15024     | EXOSC7    | 52.23             | 106.13    | 52.23        | 11             | 291   | 31.80    | 1           |
| Q15047-3   | SETDB1    | 12.33             | 44.94     | 12.33        | 11             | 1290  | 142.91   | 1           |
| Q4VCS5     | AMOT      | 16.88             | 67.07     | 15.96        | 11             | 1084  | 118.01   | 1           |
| Q6WCQ1-3   | MPRIIP    | 16.9              | 46.34     | 15.8         | 11             | 1000  | 113.98   | 1           |

Table S1 continued

| Accession | Gene name | $\Sigma$ Coverage | Score ST6 | Coverage ST6 | Unique peptide | # AAs | MW [kDa] | SAINT score |
|-----------|-----------|-------------------|-----------|--------------|----------------|-------|----------|-------------|
| Q8N1G0    | ZNF687    | 17.46             | 51.05     | 17.46        | 11             | 1237  | 129.45   | 1           |
| Q8TDN6    | BRX1      | 48.44             | 106.22    | 48.44        | 11             | 353   | 41.37    | 0.99        |
| Q92759    | GTF2H4    | 33.55             | 49.67     | 30.74        | 11             | 462   | 52.15    | 1           |
| Q96EE3    | SEH1L     | 38.89             | 66.83     | 38.89        | 11             | 360   | 39.62    | 1           |
| Q96GM5    | SMARCD1   | 31.07             | 46.65     | 27.18        | 11             | 515   | 58.20    | 1           |
| Q9NQ55-2  | PPAN      | 37.83             | 49.80     | 29.78        | 11             | 460   | 51.87    | 1           |
| Q9NV31    | IMP3      | 72.28             | 134.90    | 72.28        | 11             | 184   | 21.84    | 1           |
| Q9P2K5-2  | MYEF2     | 18.92             | 45.59     | 18.92        | 11             | 576   | 61.89    | 1           |
| Q9Y265    | RUVBL1    | 34.65             | 100.65    | 34.65        | 11             | 456   | 50.20    | 1           |
| Q9Y2I1    | NISCH     | 13.56             | 42.65     | 13.56        | 11             | 1504  | 166.52   | 1           |
| Q9Y2X0-2  | MED16     | 16.05             | 40.53     | 15.34        | 11             | 841   | 92.97    | 1           |
| Q9Y3T9    | NOC2L     | 17.09             | 42.24     | 17.09        | 11             | 749   | 84.87    | 1           |
| H3BP71    | RNF40     | 21.23             | 71.34     | 21.23        | 12             | 961   | 108.98   | 1           |
| O15047    | SETD1A    | 13.65             | 49.78     | 13.65        | 12             | 1707  | 185.92   | 1           |
| O43823    | AKAP8     | 20.23             | 83.81     | 20.23        | 12             | 692   | 76.06    | 1           |
| O60347    | TBC1D12   | 22.97             | 47.88     | 22.97        | 12             | 775   | 85.57    | 1           |
| O60832    | DKC1      | 33.07             | 62.96     | 27.82        | 12             | 514   | 57.64    | 0.98        |
| O60942-4  | RNGTT     | 28.47             | 57.10     | 28.47        | 12             | 541   | 61.67    | 1           |
| P08621    | SNRNP70   | 28.15             | 122.60    | 24.49        | 12             | 437   | 51.53    | 1           |
| P29590-11 | PML       | 26.02             | 56.85     | 26.02        | 12             | 834   | 92.51    | 1           |
| P32969    | RPL9      | 66.15             | 300.08    | 66.15        | 12             | 192   | 21.85    | 1           |
| P46100-3  | ATRX      | 7.28              | 57.43     | 7.28         | 12             | 2375  | 269.64   | 1           |
| P62906    | RPL10A    | 47.93             | 162.16    | 47.93        | 12             | 217   | 24.82    | 1           |
| P78346    | RPP30     | 51.12             | 64.38     | 51.12        | 12             | 268   | 29.30    | 1           |
| P82979    | SARNP     | 60.48             | 111.69    | 60.48        | 12             | 210   | 23.66    | 1           |
| Q07021    | C1QBP     | 52.48             | 356.36    | 52.48        | 12             | 282   | 31.34    | 1           |
| Q13428-2  | TCOF1     | 12.97             | 73.38     | 12.97        | 12             | 1411  | 144.23   | 1           |
| Q15397    | KIAA0020  | 23.46             | 64.96     | 23.46        | 12             | 648   | 73.54    | 1           |
| Q5T6F2    | UBAP2     | 27.97             | 306.21    | 27.97        | 12             | 1119  | 117.04   | 1           |
| Q6UN15    | FIP1L1    | 33.5              | 98.75     | 31.14        | 12             | 594   | 66.49    | 1           |
| Q9GZS3    | WDR61     | 55.74             | 99.76     | 55.74        | 12             | 305   | 33.56    | 1           |
| Q9H089    | LSG1      | 29.18             | 64.00     | 29.18        | 12             | 658   | 75.18    | 1           |
| Q9H7U1-3  | CCSER2    | 21.11             | 51.40     | 21.11        | 12             | 1047  | 116.84   | 1           |
| Q9H9Y6    | POLR1B    | 13.66             | 61.95     | 13.66        | 12             | 1135  | 128.15   | 1           |
| Q9NY93-2  | DDX56     | 28.99             | 49.26     | 26.63        | 12             | 507   | 57.24    | 1           |
| Q9UBP6    | METTL1    | 50.72             | 194.06    | 50.72        | 12             | 276   | 31.45    | 1           |
| Q9UG63    | ABCF2     | 20.55             | 51.53     | 20.55        | 12             | 623   | 71.24    | 0.98        |
| Q9ULW3    | ABT1      | 57.35             | 72.41     | 57.35        | 12             | 272   | 31.06    | 1           |
| Q9UPS6-2  | SETD1B    | 11.91             | 63.44     | 11.91        | 12             | 1923  | 208.60   | 1           |
| Q9Y295    | DRG1      | 45.78             | 55.20     | 45.78        | 12             | 367   | 40.52    | 0.86        |

Table S1 continued

| Accession  | Gene name | $\Sigma$ Coverage | Score ST6 | Coverage ST6 | Unique peptide | # AAs | MW [kDa] | SAINT score |
|------------|-----------|-------------------|-----------|--------------|----------------|-------|----------|-------------|
| Q9Y2X7     | GIT1      | 29.57             | 55.56     | 29.57        | 12             | 761   | 84.29    | 1           |
| Q9Y450-4   | HBS1L     | 29.91             | 82.20     | 27.88        | 12             | 642   | 70.58    | 1           |
| A0A087WXM6 | RPL17     | 53.25             | 282.96    | 53.25        | 13             | 169   | 19.57    | 1           |
| E7EXA6     | CHTF18    | 20.31             | 42.35     | 20.31        | 13             | 975   | 107.36   | 1           |
| F5H8F7     | ASH2L     | 38.04             | 71.34     | 38.04        | 13             | 489   | 55.29    | 1           |
| O15381     | NVL       | 22.43             | 49.10     | 22.43        | 13             | 856   | 94.99    | 1           |
| P26196     | DDX6      | 40.17             | 77.69     | 40.17        | 13             | 483   | 54.38    | 1           |
| P37198     | NUP62     | 23.95             | 96.03     | 23.95        | 13             | 522   | 53.22    | 1           |
| P40938     | RFC3      | 44.66             | 55.58     | 34.55        | 13             | 356   | 40.53    | 1           |
| P62750     | RPL23A    | 47.44             | 105.62    | 46.79        | 13             | 156   | 17.68    | 1           |
| P78406     | RAE1      | 55.16             | 101.00    | 52.72        | 13             | 368   | 40.94    | 1           |
| Q13610     | PWP1      | 38.12             | 90.07     | 38.12        | 13             | 501   | 55.79    | 1           |
| Q15291     | RBBP5     | 31.97             | 54.79     | 31.97        | 13             | 538   | 59.12    | 1           |
| Q86YS7     | C2CD5     | 17.8              | 59.83     | 17.8         | 13             | 1000  | 110.38   | 1           |
| Q92610     | ZNF592    | 15.47             | 86.56     | 15.47        | 13             | 1267  | 137.44   | 1           |
| Q92989     | CLP1      | 29.65             | 106.55    | 29.65        | 13             | 425   | 47.62    | 1           |
| Q9BQ39     | DDX50     | 30.12             | 82.85     | 27.14        | 13             | 737   | 82.51    | 0.95        |
| Q9H5Z1-2   | DHX35     | 29.76             | 60.96     | 28.42        | 13             | 672   | 75.39    | 1           |
| Q9UJX5     | ANAPC4    | 22.15             | 48.55     | 21.16        | 13             | 808   | 92.06    | 1           |
| B7Z6D5     | DDX27     | 18.69             | 43.95     | 17.65        | 14             | 765   | 86.55    | 1           |
| H0YM23     | ANKRD17   | 17.29             | 88.74     | 16.53        | 14             | 2487  | 263.20   | 1           |
| H7BXH2     | PPP6R3    | 24.06             | 61.47     | 24.06        | 14             | 827   | 92.35    | 1           |
| O43663-4   | PRC1      | 33                | 78.38     | 28.55        | 14             | 606   | 70.15    | 1           |
| O60341     | KDM1A     | 25                | 71.66     | 25           | 14             | 852   | 92.84    | 1           |
| O60568     | PLOD3     | 28.46             | 126.65    | 28.46        | 14             | 738   | 84.73    | 1           |
| P19387     | POLR2C    | 62.55             | 135.71    | 62.55        | 14             | 275   | 31.42    | 1           |
| P60510     | PPP4C     | 68.08             | 181.92    | 68.08        | 14             | 307   | 35.06    | 1           |
| Q06787-8   | FMR1      | 30.03             | 109.72    | 30.03        | 14             | 586   | 66.21    | 1           |
| Q14137-2   | BOP1      | 41.17             | 91.14     | 41.17        | 14             | 634   | 71.89    | 1           |
| Q5JRA6-2   | MIA3      | 11.15             | 41.68     | 9.74         | 14             | 1848  | 206.76   | 1           |
| Q5SW79     | CEP170    | 14.14             | 62.32     | 14.14        | 14             | 1584  | 175.19   | 1           |
| Q8IXW5-2   | RPAP2     | 31.51             | 62.13     | 31.51        | 14             | 584   | 66.43    | 1           |
| Q8IZL8     | PELP1     | 23.19             | 110.66    | 23.19        | 14             | 1130  | 119.62   | 1           |
| Q8WTT2     | NOC3L     | 23.88             | 83.59     | 23.88        | 14             | 800   | 92.49    | 1           |
| Q96S38     | RPS6KC1   | 23.73             | 57.11     | 23.73        | 14             | 1066  | 118.61   | 1           |
| Q96S55-2   | WRNIP1    | 24.38             | 52.31     | 24.38        | 14             | 640   | 69.42    | 1           |
| Q9H6R4-4   | NOL6      | 21.96             | 53.42     | 21.26        | 14             | 1143  | 127.24   | 1           |
| Q9NVP1     | DDX18     | 37.16             | 88.97     | 37.16        | 14             | 670   | 75.36    | 1           |
| Q9Y5B9     | SUPT16H   | 19.1              | 53.02     | 18.15        | 14             | 1047  | 119.84   | 0.99        |
| A0A087WYU1 | SNX9      | 50.84             | 129.18    | 50.84        | 15             | 594   | 66.43    | 1           |

Table S1 continued

| Accession  | Gene name | $\Sigma$ Coverage | Score ST6 | Coverage ST6 | Unique peptide | # AAs | MW [kDa] | SAINT score |
|------------|-----------|-------------------|-----------|--------------|----------------|-------|----------|-------------|
| B4DXZ6     | FXR1      | 45.72             | 127.76    | 45.72        | 15             | 608   | 68.29    | 1           |
| O00469     | PLOD2     | 28.36             | 64.56     | 28.36        | 15             | 737   | 84.63    | 1           |
| O95625     | ZBTB11    | 17.76             | 85.82     | 17.76        | 15             | 1053  | 119.31   | 1           |
| P05455     | SSB       | 42.89             | 76.69     | 42.89        | 15             | 408   | 46.81    | 1           |
| P06748-2   | NPM1      | 53.58             | 1039.59   | 53.58        | 15             | 265   | 29.45    | 1           |
| P52597     | HNRNPF    | 63.13             | 770.45    | 63.13        | 15             | 415   | 45.64    | 1           |
| P57081     | WDR4      | 46.12             | 176.52    | 46.12        | 15             | 412   | 45.46    | 1           |
| Q03701     | CEBPZ     | 19.17             | 92.02     | 19.17        | 15             | 1054  | 120.90   | 1           |
| Q15269     | PWP2      | 24.48             | 83.42     | 24.48        | 15             | 919   | 102.39   | 1           |
| Q15642-2   | TRIP10    | 38.35             | 239.05    | 38.35        | 15             | 545   | 62.55    | 1           |
| Q15648     | MED1      | 14.23             | 65.57     | 14.23        | 15             | 1581  | 168.37   | 1           |
| Q7Z2W4     | ZC3HAV1   | 25.94             | 73.47     | 25.94        | 15             | 902   | 101.37   | 1           |
| Q8IXB1     | DNAJC10   | 24.34             | 54.75     | 22.82        | 15             | 793   | 91.02    | 1           |
| Q8ND04     | SMG8      | 24.72             | 112.31    | 24.72        | 15             | 991   | 109.61   | 1           |
| Q96JC1-2   | VPS39     | 24.46             | 47.17     | 24.46        | 15             | 875   | 100.70   | 1           |
| Q9H078-2   | CLPB      | 30.43             | 47.45     | 17.73        | 15             | 677   | 75.40    | 1           |
| Q9NRG9     | AAAS      | 44.87             | 89.18     | 44.87        | 15             | 546   | 59.54    | 1           |
| Q9NVU7     | SDAD1     | 22.27             | 73.67     | 22.27        | 15             | 687   | 79.82    | 1           |
| Q9NY27     | PPP4R2    | 45.08             | 123.46    | 45.08        | 15             | 417   | 46.87    | 1           |
| Q9UBD5     | ORC3      | 34.88             | 79.87     | 32.63        | 15             | 711   | 82.20    | 1           |
| Q9UER7     | DAXX      | 26.35             | 95.78     | 26.35        | 15             | 740   | 81.32    | 1           |
| Q9Y2K1     | ZBTB1     | 28.47             | 71.51     | 28.47        | 15             | 713   | 81.96    | 1           |
| A0A087WV66 | MKI67     | 8.66              | 44.71     | 7.99         | 16             | 3255  | 358.41   | 1           |
| E9PFT7     | APC       | 17.55             | 61.42     | 17.55        | 16             | 1305  | 145.67   | 1           |
| G5EA36     | CDC27     | 38.64             | 74.47     | 38.64        | 16             | 823   | 91.68    | 1           |
| O60306     | AQR       | 16.23             | 49.60     | 16.23        | 16             | 1485  | 171.19   | 1           |
| O95602     | POLR1A    | 15.7              | 64.03     | 13.9         | 16             | 1720  | 194.69   | 1           |
| P06493     | CDK1      | 73.06             | 163.26    | 73.06        | 16             | 297   | 34.07    | 1           |
| P22087     | FBL       | 57.94             | 163.93    | 57.94        | 16             | 321   | 33.76    | 1           |
| P31350     | RRM2      | 54.76             | 191.44    | 54.76        | 16             | 389   | 44.85    | 1           |
| P51531-2   | SMARCA2   | 20.8              | 151.65    | 19.21        | 16             | 1572  | 179.17   | 1           |
| Q5VUA4     | ZNF318    | 11.5              | 92.87     | 10.05        | 16             | 2279  | 250.96   | 1           |
| Q68CP9-3   | ARID2     | 13.4              | 85.32     | 13.4         | 16             | 1783  | 191.30   | 1           |
| Q70EL1-7   | USP54     | 14.8              | 66.24     | 14.8         | 16             | 1534  | 170.48   | 1           |
| Q7LG56     | RRM2B     | 62.68             | 172.14    | 62.68        | 16             | 351   | 40.71    | 1           |
| Q99959-2   | PKP2      | 32.5              | 99.40     | 32.5         | 16             | 837   | 92.70    | 1           |
| Q9H6R7     | C2orf44   | 38.56             | 88.95     | 38.56        | 16             | 721   | 79.09    | 1           |
| Q9NVC6     | MED17     | 32.26             | 52.14     | 30.57        | 16             | 651   | 72.84    | 1           |
| Q9NW13-2   | RBM28     | 29.45             | 85.73     | 29.45        | 16             | 618   | 69.88    | 1           |
| Q9NXC5     | MIOS      | 23.31             | 46.47     | 21.14        | 16             | 875   | 98.52    | 1           |

Table S1 continued

| Accession | Gene name | $\Sigma$ Coverage | Score ST6 | Coverage ST6 | Unique peptide | # AAs | MW [kDa] | SAINT score |
|-----------|-----------|-------------------|-----------|--------------|----------------|-------|----------|-------------|
| Q9P2N5    | RBM27     | 23.3              | 152.18    | 21.79        | 16             | 1060  | 118.64   | 1           |
| Q9UJX2    | CDC23     | 30.99             | 54.35     | 28.48        | 16             | 597   | 68.79    | 1           |
| Q9UKJ3    | GPATCH8   | 14.05             | 78.85     | 14.05        | 16             | 1502  | 164.10   | 1           |
| P15880    | RPS2      | 49.49             | 423.47    | 49.49        | 17             | 293   | 31.30    | 1           |
| P46777    | RPL5      | 58.25             | 383.75    | 55.89        | 17             | 297   | 34.34    | 1           |
| Q06210-2  | GFPT1     | 41.7              | 153.66    | 39.79        | 17             | 681   | 76.71    | 1           |
| Q13627-2  | DYRK1A    | 22.28             | 79.60     | 22.28        | 17             | 754   | 84.50    | 1           |
| Q14160    | SCRIB     | 20.31             | 78.83     | 20.31        | 17             | 1630  | 174.78   | 1           |
| Q14669-4  | TRIP12    | 16.9              | 65.02     | 16.2         | 17             | 1722  | 191.95   | 0.98        |
| Q92922    | SMARCC1   | 32.49             | 250.36    | 31.76        | 17             | 1105  | 122.79   | 1           |
| Q96RF0-2  | SNX18     | 37.02             | 91.30     | 37.02        | 17             | 624   | 68.96    | 1           |
| Q96T76    | MMS19     | 28.54             | 72.08     | 27.38        | 17             | 1030  | 113.22   | 0.99        |
| Q99575    | POP1      | 25.2              | 129.44    | 25.2         | 17             | 1024  | 114.64   | 1           |
| Q9BYW2    | SETD2     | 10.96             | 49.70     | 10.96        | 17             | 2564  | 287.42   | 1           |
| A6NNK5    | TP53BP1   | 17.33             | 82.35     | 17.33        | 18             | 1927  | 208.89   | 1           |
| H0YNU5    | BLM       | 20.84             | 65.55     | 20.22        | 18             | 1286  | 144.38   | 1           |
| P05388    | RPLP0     | 59.62             | 789.70    | 59.62        | 18             | 317   | 34.25    | 1           |
| P30414    | NKTR      | 18.13             | 132.21    | 18.13        | 18             | 1462  | 165.58   | 1           |
| P47897    | QARS      | 32.13             | 58.53     | 27.61        | 18             | 775   | 87.74    | 1           |
| P50454    | SERPINH1  | 57.18             | 225.11    | 57.18        | 18             | 418   | 46.41    | 0.96        |
| P51116    | FXR2      | 42.2              | 117.09    | 41.01        | 18             | 673   | 74.18    | 1           |
| P52292    | KPNA2     | 61.06             | 212.18    | 61.06        | 18             | 529   | 57.83    | 1           |
| Q08945    | SSRP1     | 30.32             | 68.13     | 30.32        | 18             | 709   | 81.02    | 1           |
| Q14157-4  | UBAP2L    | 40.98             | 330.47    | 40.98        | 18             | 976   | 103.11   | 1           |
| Q14573    | ITPR3     | 12.84             | 74.52     | 12.84        | 18             | 2671  | 303.91   | 1           |
| Q14674    | ESPL1     | 15.19             | 62.50     | 15.19        | 18             | 2120  | 233.03   | 1           |
| Q14C86-5  | GAPVD1    | 20.45             | 74.55     | 20.45        | 18             | 1452  | 162.13   | 1           |
| Q16204    | CCDC6     | 36.08             | 128.71    | 36.08        | 18             | 474   | 53.26    | 1           |
| Q5VTR2    | RNF20     | 27.59             | 82.44     | 26.15        | 18             | 975   | 113.59   | 1           |
| Q6PD62    | CTR9      | 21.74             | 139.84    | 21.74        | 18             | 1173  | 133.42   | 1           |
| Q8NB90    | SPATA5    | 33.03             | 105.54    | 31.69        | 18             | 893   | 97.84    | 0.9         |
| Q8TDD1    | DDX54     | 32.35             | 92.88     | 32.35        | 18             | 881   | 98.53    | 1           |
| Q92974-3  | ARHGEF2   | 26.2              | 68.34     | 25.05        | 18             | 958   | 108.17   | 1           |
| O95714    | HERC2     | 5.79              | 51.60     | 5.79         | 19             | 4834  | 526.90   | 1           |
| P19784    | CSNK2A2   | 63.14             | 151.33    | 60.57        | 19             | 350   | 41.19    | 1           |
| P21127-6  | CDK11B    | 28.18             | 46.90     | 28.18        | 19             | 738   | 86.01    | 1           |
| P39023    | RPL3      | 44.91             | 520.15    | 44.91        | 19             | 403   | 46.08    | 1           |
| Q5VYS8    | ZCCHC6    | 20.27             | 46.12     | 18.19        | 19             | 1495  | 171.12   | 1           |
| Q7Z478    | DHX29     | 23.89             | 68.98     | 22.35        | 19             | 1369  | 155.14   | 1           |
| Q8IY92    | SLX4      | 19.63             | 113.92    | 19.63        | 19             | 1834  | 199.89   | 1           |

Table S1 continued

| Accession | Gene name | $\Sigma$ Coverage | Score ST6 | Coverage ST6 | Unique peptide | # AAs | MW [kDa] | SAINT score |
|-----------|-----------|-------------------|-----------|--------------|----------------|-------|----------|-------------|
| Q8N3X1    | FNBP4     | 26.06             | 124.99    | 26.06        | 19             | 1017  | 110.20   | 1           |
| Q8NHQ9    | DDX55     | 35                | 78.97     | 35           | 19             | 600   | 68.50    | 1           |
| Q96L91-3  | EP400     | 11.63             | 67.51     | 11.08        | 19             | 3086  | 335.60   | 1           |
| Q9H1I8    | ASCC2     | 29.85             | 167.39    | 29.85        | 19             | 757   | 86.31    | 1           |
| Q9NNW5    | WDR6      | 28.28             | 121.49    | 28.28        | 19             | 1121  | 121.65   | 1           |
| Q9NPF5    | DMAP1     | 46.9              | 117.19    | 45.18        | 19             | 467   | 52.96    | 1           |
| P52701    | MSH6      | 19.85             | 73.72     | 19.85        | 20             | 1360  | 152.69   | 1           |
| P61247    | RPS3A     | 57.95             | 884.04    | 57.95        | 20             | 264   | 29.93    | 1           |
| Q02241    | KIF23     | 29.17             | 108.63    | 27.4         | 20             | 960   | 109.99   | 1           |
| Q14247    | CTTN      | 38.36             | 227.15    | 36.91        | 20             | 550   | 61.55    | 1           |
| Q14684    | RRP1B     | 35.49             | 108.76    | 35.49        | 20             | 758   | 84.38    | 1           |
| Q5VUJ6-2  | LRCH2     | 37.17             | 136.11    | 37.03        | 20             | 748   | 82.76    | 1           |
| Q99567    | NUP88     | 41.7              | 142.81    | 41.7         | 20             | 741   | 83.49    | 1           |
| Q99832    | CCT7      | 47.88             | 119.83    | 41.44        | 20             | 543   | 59.33    | 1           |
| Q9H0W5    | CCDC8     | 50.56             | 189.96    | 50.56        | 20             | 538   | 59.34    | 1           |
| Q9H501    | ESF1      | 26.79             | 134.42    | 26.79        | 20             | 851   | 98.73    | 1           |
| Q9HCE1    | MOV10     | 25.42             | 86.71     | 24.53        | 20             | 1003  | 113.60   | 1           |
| Q9NQZ2    | UTP3      | 44.05             | 326.26    | 44.05        | 20             | 479   | 54.53    | 1           |
| Q9Y2U8    | LEMD3     | 31.94             | 112.13    | 31.94        | 20             | 911   | 99.94    | 1           |
| O00116    | AGPS      | 50.76             | 310.77    | 49.54        | 21             | 658   | 72.87    | 1           |
| O14654    | IRS4      | 25.86             | 126.55    | 22.04        | 21             | 1257  | 133.68   | 1           |
| O43395    | PRPF3     | 33.38             | 151.70    | 33.38        | 21             | 683   | 77.48    | 1           |
| O94913    | PCF11     | 50.87             | 1197.24   | 50.87        | 21             | 1555  | 172.94   | 1           |
| O95831    | AIFM1     | 46                | 88.12     | 38.99        | 21             | 613   | 66.86    | 1           |
| P19447    | ERCC3     | 40.79             | 120.12    | 40.79        | 21             | 782   | 89.22    | 1           |
| Q15020    | SART3     | 31.36             | 184.57    | 31.36        | 21             | 963   | 109.87   | 1           |
| Q1KMD3    | HNRNPUL2  | 31.06             | 79.27     | 26.24        | 21             | 747   | 85.05    | 1           |
| Q5VT52-3  | RPRD2     | 28.43             | 107.12    | 26.06        | 21             | 1435  | 152.78   | 1           |
| Q92889    | ERCC4     | 36.03             | 174.29    | 36.03        | 21             | 916   | 104.42   | 1           |
| Q9BUJ2-2  | HNRNPUL1  | 35.7              | 206.76    | 34.7         | 21             | 804   | 90.24    | 1           |
| Q9BW27    | NUP85     | 42.38             | 140.01    | 40.4         | 21             | 656   | 74.97    | 1           |
| Q9H6S0    | YTHDC2    | 19.65             | 88.53     | 18.74        | 21             | 1430  | 160.15   | 1           |
| Q9ULK4-4  | MED23     | 22.22             | 89.44     | 22.22        | 21             | 1359  | 155.45   | 0.95        |
| Q9UPY3-2  | DICER1    | 18.43             | 80.86     | 17           | 21             | 1829  | 208.32   | 1           |
| Q9Y4W2    | LAS1L     | 45.5              | 118.42    | 45.5         | 21             | 734   | 83.01    | 1           |
| O60244    | MED14     | 24.42             | 137.74    | 24.42        | 22             | 1454  | 160.50   | 1           |
| P17480-2  | UBTF      | 26.13             | 183.75    | 26.13        | 22             | 727   | 84.88    | 1           |
| P51532-5  | SMARCA4   | 24.18             | 195.46    | 22.63        | 22             | 1613  | 181.15   | 1           |
| P55265-5  | ADAR      | 33.3              | 112.91    | 33.3         | 22             | 931   | 103.58   | 0.94        |
| Q14444-2  | CAPRIN1   | 60.52             | 821.80    | 60.52        | 22             | 694   | 76.81    | 1           |

Table S1 continued

| Accession | Gene name | $\Sigma$ Coverage | Score ST6 | Coverage ST6 | Unique peptide | # AAs | MW [kDa] | SAINT score |
|-----------|-----------|-------------------|-----------|--------------|----------------|-------|----------|-------------|
| Q14566    | MCM6      | 33.01             | 149.40    | 33.01        | 22             | 821   | 92.83    | 1           |
| Q6R327    | RICTOR    | 18.79             | 83.34     | 18.21        | 22             | 1708  | 192.10   | 1           |
| Q7Z417    | NUFIP2    | 46.33             | 375.91    | 46.33        | 22             | 695   | 76.07    | 1           |
| Q96II8    | LRCH3     | 46.85             | 199.90    | 46.85        | 22             | 777   | 86.03    | 1           |
| Q9BVQ7    | SPATA5L1  | 51.13             | 70.48     | 51.13        | 22             | 753   | 80.66    | 1           |
| Q9BZE4    | GTPBP4    | 35.02             | 139.79    | 35.02        | 22             | 634   | 73.92    | 1           |
| Q9H2P0    | ADNP      | 29.49             | 190.79    | 29.49        | 22             | 1102  | 123.49   | 1           |
| Q9NXF1-2  | TEX10     | 31.33             | 139.72    | 31.33        | 22             | 913   | 103.85   | 1           |
| O95235    | KIF20A    | 37.64             | 117.10    | 37.64        | 23             | 890   | 100.22   | 1           |
| O95248    | SBF1      | 19.71             | 103.18    | 19.71        | 23             | 1867  | 208.18   | 1           |
| O95757    | HSPA4L    | 41.24             | 151.11    | 41.24        | 23             | 839   | 94.45    | 1           |
| P46087-2  | NOP2      | 37.25             | 209.57    | 37.25        | 23             | 808   | 88.92    | 1           |
| Q08J23    | NSUN2     | 42.76             | 144.86    | 39.63        | 23             | 767   | 86.42    | 1           |
| Q8N6T7-2  | SIRT6     | 81.4              | 25027.22  | 81.4         | 23             | 328   | 36.04    | 1           |
| Q8NI36    | WDR36     | 36.8              | 132.27    | 36.8         | 23             | 951   | 105.26   | 1           |
| Q9H1A4    | ANAPC1    | 18.78             | 102.60    | 18.78        | 23             | 1944  | 216.36   | 1           |
| Q9P2E9    | RRBP1     | 21.7              | 41.92     | 8.58         | 23             | 1410  | 152.38   | 1           |
| O00267-2  | SUPT5H    | 28.99             | 195.25    | 28.99        | 24             | 1083  | 120.42   | 1           |
| O60293    | ZFC3H1    | 17.9              | 107.63    | 17.14        | 24             | 1989  | 226.21   | 1           |
| P33993    | MCM7      | 46.59             | 234.84    | 46.59        | 24             | 719   | 81.26    | 1           |
| Q02809    | PLOD1     | 41.82             | 238.54    | 41.82        | 24             | 727   | 83.50    | 1           |
| Q13823    | GNL2      | 31.19             | 98.79     | 30.1         | 24             | 731   | 83.60    | 1           |
| Q15650    | TRIP4     | 51.12             | 110.04    | 48.54        | 24             | 581   | 66.10    | 1           |
| Q92576-2  | PHF3      | 19.02             | 136.40    | 19.02        | 24             | 1951  | 219.67   | 1           |
| O00566    | MPHOSPH10 | 35.39             | 410.22    | 35.39        | 25             | 681   | 78.82    | 1           |
| O94964-2  | SOGA1     | 23.12             | 94.52     | 23.12        | 25             | 1661  | 183.74   | 1           |
| P02545-3  | LMNA      | 45.27             | 51.42     | 26.66        | 25             | 634   | 70.62    | 1           |
| P33991    | MCM4      | 36.96             | 133.95    | 36.96        | 25             | 863   | 96.50    | 1           |
| Q12788    | TBL3      | 45.92             | 167.20    | 44.55        | 25             | 808   | 88.98    | 1           |
| Q5SRE5    | NUP188    | 19.61             | 114.23    | 18.75        | 25             | 1749  | 195.92   | 1           |
| P52272-2  | HNRNPM    | 54.7              | 525.81    | 54.7         | 26             | 691   | 73.57    | 1           |
| Q13263    | TRIM28    | 53.05             | 357.24    | 53.05        | 26             | 835   | 88.49    | 1           |
| Q5JSL3    | DOCK11    | 19.68             | 104.68    | 19.68        | 26             | 2073  | 237.52   | 1           |
| Q7Z5K2    | WAPAL     | 32.94             | 190.74    | 32.94        | 26             | 1190  | 132.86   | 1           |
| Q8IY81    | FTSJ3     | 41.79             | 246.98    | 41.79        | 26             | 847   | 96.50    | 1           |
| Q9HCK8    | CHD8      | 18.25             | 99.01     | 18.25        | 26             | 2581  | 290.34   | 1           |
| Q9UBU9    | NXF1      | 53.47             | 221.63    | 53.47        | 26             | 619   | 70.14    | 1           |
| O60264    | SMARCA5   | 24.81             | 137.17    | 24.81        | 27             | 1052  | 121.83   | 1           |
| O60716-13 | CTNND1    | 43.57             | 186.97    | 43.57        | 27             | 879   | 97.99    | 1           |
| P49736    | MCM2      | 40.6              | 290.26    | 40.6         | 27             | 904   | 101.83   | 1           |

Table S1 continued

| Accession | Gene name | $\Sigma$ Coverage | Score ST6 | Coverage ST6 | Unique peptide | # AAs | MW [kDa] | SAINT score |
|-----------|-----------|-------------------|-----------|--------------|----------------|-------|----------|-------------|
| Q13283    | G3BP1     | 60.3              | 5199.88   | 60.3         | 27             | 466   | 52.13    | 1           |
| Q7Z2T5    | TRMT1L    | 58.66             | 167.73    | 56.62        | 27             | 733   | 81.70    | 1           |
| Q8N1F7    | NUP93     | 45.18             | 181.11    | 45.18        | 27             | 819   | 93.43    | 1           |
| Q8NFD5-4  | ARID1B    | 23.76             | 151.03    | 23.76        | 27             | 1486  | 162.37   | 1           |
| Q9BXP5-4  | SRRT      | 36.17             | 181.51    | 36.17        | 27             | 871   | 100.09   | 1           |
| Q9UNX4    | WDR3      | 44.86             | 169.81    | 44.86        | 27             | 943   | 106.03   | 1           |
| O75694-2  | NUP155    | 30.18             | 139.92    | 30.18        | 28             | 1332  | 148.92   | 1           |
| O76021    | RSL1D1    | 43.27             | 216.44    | 43.27        | 28             | 490   | 54.94    | 1           |
| O95163    | IKBKAP    | 31.08             | 106.73    | 31.08        | 28             | 1332  | 150.16   | 1           |
| P33992    | MCM5      | 47.28             | 239.42    | 47.28        | 28             | 734   | 82.23    | 1           |
| Q14258    | TRIM25    | 46.35             | 188.73    | 46.35        | 28             | 630   | 70.93    | 1           |
| Q5JTH9    | RRP12     | 31.61             | 119.28    | 29.45        | 28             | 1297  | 143.61   | 1           |
| Q8NE71-2  | ABCF1     | 48.08             | 232.14    | 46.72        | 28             | 807   | 91.62    | 1           |
| J3KNB8    | MAP3K4    | 26.32             | 116.12    | 26.32        | 29             | 1554  | 176.46   | 1           |
| P34932    | HSPA4     | 44.29             | 237.14    | 44.29        | 29             | 840   | 94.27    | 1           |
| O15226    | NKRF      | 44.2              | 215.52    | 42.46        | 30             | 690   | 77.62    | 0.99        |
| P42285    | SKIV2L2   | 37.72             | 175.40    | 36.66        | 30             | 1042  | 117.73   | 1           |
| P78347-2  | GTF2I     | 40.54             | 306.08    | 38.14        | 30             | 957   | 107.90   | 1           |
| Q6IN85-2  | SMEK1     | 53.29             | 377.08    | 53.29        | 30             | 820   | 93.84    | 1           |
| Q8WUA4    | GTF3C2    | 45.77             | 449.77    | 45.77        | 30             | 911   | 100.62   | 1           |
| F5GWX5    | CHD4      | 30.13             | 246.01    | 29.71        | 31             | 1905  | 216.97   | 1           |
| Q8TEM1    | NUP210    | 24.38             | 202.75    | 24.01        | 32             | 1887  | 204.98   | 1           |
| Q92900-2  | UPF1      | 38.01             | 210.12    | 37.03        | 32             | 1118  | 122.96   | 1           |
| Q9ULT8    | HECTD1    | 20.5              | 132.01    | 20.04        | 32             | 2610  | 289.20   | 1           |
| P28288    | ABCD3     | 48.86             | 309.74    | 48.86        | 33             | 659   | 75.43    | 1           |
| Q12906    | ILF3      | 55.93             | 440.92    | 55.15        | 33             | 894   | 95.28    | 1           |
| Q14571    | ITPR2     | 18.92             | 161.93    | 18.92        | 33             | 2701  | 307.87   | 1           |
| Q6PKG0    | LARP1     | 45.8              | 286.89    | 45.8         | 33             | 1096  | 123.43   | 1           |
| P19338    | NCL       | 38.03             | 2023.87   | 38.03        | 34             | 710   | 76.57    | 1           |
| P57740    | NUP107    | 51.78             | 241.55    | 51.78        | 34             | 925   | 106.31   | 1           |
| Q14694    | USP10     | 60.15             | 1102.20   | 60.15        | 35             | 798   | 87.08    | 1           |
| O00411    | POLRMT    | 46.99             | 249.96    | 46.99        | 36             | 1230  | 138.53   | 1           |
| O94906    | PRPF6     | 44.53             | 167.21    | 37.09        | 36             | 941   | 106.86   | 1           |
| Q9BSJ8    | ESYT1     | 45.11             | 423.45    | 45.11        | 36             | 1104  | 122.78   | 1           |
| Q9Y5Q9    | GTF3C3    | 48.76             | 483.78    | 46.84        | 36             | 886   | 101.21   | 1           |
| O00571    | DDX3X     | 59.37             | 714.31    | 59.37        | 38             | 662   | 73.20    | 1           |
| P13010    | XRCC5     | 69.26             | 358.12    | 69.26        | 38             | 732   | 82.65    | 1           |
| Q562F6-2  | SGOL2     | 42.19             | 315.24    | 42.19        | 38             | 1261  | 144.09   | 1           |
| Q9H0D6    | XRN2      | 54.53             | 298.67    | 54.53        | 38             | 950   | 108.51   | 1           |
| P21359    | NF1       | 18.53             | 152.48    | 18.53        | 39             | 2839  | 319.17   | 1           |



Table S1 continued

| Accession | Gene name | $\Sigma$ Coverage | Score ST6 | Coverage ST6 | Unique peptide | # AAs | MW [kDa] | SAINT score |
|-----------|-----------|-------------------|-----------|--------------|----------------|-------|----------|-------------|
| Q01780    | EXOSC10   | 54.12             | 242.49    | 52.66        | 39             | 885   | 100.77   | 1           |
| Q9H0A0    | NAT10     | 49.07             | 318.78    | 49.07        | 39             | 1025  | 115.66   | 1           |
| Q9Y4E8    | USP15     | 47.81             | 159.75    | 36.7         | 39             | 981   | 112.35   | 1           |
| P25205    | MCM3      | 56.68             | 442.45    | 56.68        | 40             | 808   | 90.92    | 1           |
| P35658-2  | NUP214    | 32.61             | 273.25    | 32.61        | 40             | 2079  | 212.44   | 1           |
| P98175-2  | RBM10     | 49.62             | 116.22    | 25.51        | 40             | 929   | 103.37   | 1           |
| Q00610-2  | CLTC      | 33.86             | 173.92    | 27.15        | 40             | 1639  | 187.77   | 1           |
| Q12769    | NUP160    | 37.74             | 302.74    | 37.74        | 40             | 1436  | 162.02   | 1           |
| P49792    | RANBP2    | 30.99             | 320.07    | 29.65        | 41             | 3224  | 357.97   | 1           |
| P11388    | TOP2A     | 40.24             | 320.08    | 40.24        | 42             | 1531  | 174.28   | 1           |
| Q9Y4A5-2  | TRRAP     | 16.01             | 152.73    | 14.65        | 42             | 3830  | 434.13   | 1           |
| P78332    | RBM6      | 42.83             | 407.17    | 42.83        | 43             | 1123  | 128.57   | 1           |
| Q7Z406-6  | MYH14     | 32.5              | 232.69    | 30.9         | 43             | 2003  | 228.53   | 1           |
| C9J2Y9    | POLR2B    | 45.76             | 362.71    | 45.76        | 44             | 1167  | 132.97   | 1           |
| P52948-5  | NUP98     | 36.28             | 345.39    | 36.28        | 44             | 1800  | 195.70   | 1           |
| Q14980-2  | NUMA1     | 30.03             | 248.08    | 30.03        | 44             | 2101  | 236.37   | 1           |
| Q68CQ4    | DIEXF     | 63.23             | 729.59    | 63.23        | 44             | 756   | 87.00    | 1           |
| P09874    | PARP1     | 54.64             | 500.74    | 54.64        | 45             | 1014  | 113.01   | 1           |
| Q8TEQ6    | GEMIN5    | 43.63             | 284.79    | 43.63        | 45             | 1508  | 168.48   | 1           |
| Q9BQG0    | MYBBP1A   | 43.6              | 387.74    | 41.87        | 45             | 1328  | 148.76   | 1           |
| Q7KZ85    | SUPT6H    | 35.05             | 235.54    | 35.05        | 46             | 1726  | 198.95   | 1           |
| Q7KZF4    | SND1      | 62.64             | 539.17    | 61.65        | 46             | 910   | 101.93   | 0.97        |
| Q6ZRS2-2  | SRCAP     | 21.84             | 317.39    | 21.84        | 47             | 3168  | 337.24   | 1           |
| Q86U86-4  | PBRM1     | 35.71             | 264.23    | 35.71        | 48             | 1582  | 180.97   | 1           |
| Q8WUM0    | NUP133    | 51.82             | 306.84    | 50.43        | 48             | 1156  | 128.90   | 1           |
| Q14676    | MDC1      | 42.89             | 511.61    | 42.89        | 50             | 2089  | 226.53   | 1           |
| Q92621    | NUP205    | 32.7              | 261.10    | 32.31        | 50             | 2012  | 227.78   | 1           |
| Q96Q15    | SMG1      | 23.41             | 230.04    | 23.11        | 52             | 3661  | 410.24   | 1           |
| Q9UKN8    | GTF3C4    | 78.22             | 542.56    | 78.22        | 52             | 822   | 91.92    | 1           |
| Q08211    | DHX9      | 55.12             | 789.48    | 55.12        | 53             | 1270  | 140.87   | 1           |
| Q7L2E3-3  | DHX30     | 58.61             | 481.86    | 58.61        | 53             | 1155  | 129.36   | 1           |
| Q92620    | DHX38     | 50.86             | 1168.85   | 50.86        | 53             | 1227  | 140.42   | 1           |
| P24928    | POLR2A    | 35.63             | 483.54    | 35.63        | 58             | 1970  | 217.04   | 1           |
| O95071-2  | UBR5      | 32.77             | 505.53    | 32.49        | 62             | 2798  | 309.03   | 1           |
| Q93008-1  | USP9X     | 33.44             | 310.54    | 32.77        | 63             | 2554  | 290.28   | 1           |
| Q13085    | ACACA     | 35.46             | 380.49    | 35.46        | 65             | 2346  | 265.38   | 1           |
| O75592-2  | MYCBP2    | 20.85             | 291.98    | 20.85        | 66             | 4637  | 509.38   | 1           |
| F8VPD4    | CAD       | 47.04             | 507.79    | 47.04        | 67             | 2162  | 235.87   | 1           |
| Q7Z6Z7-3  | HUWE1     | 25.57             | 357.26    | 25.43        | 67             | 4365  | 480.72   | 1           |
| Q8N3C0    | ASCC3     | 42.64             | 397.41    | 42.64        | 67             | 2202  | 251.30   | 1           |

Table S1 continued

| Accession | Gene name | $\Sigma$ Coverage | Score ST6 | Coverage ST6 | Unique peptide | # AAs | MW [kDa] | SAINT score |
|-----------|-----------|-------------------|-----------|--------------|----------------|-------|----------|-------------|
| Q9BQS8    | FYCO1     | 58.19             | 620.39    | 57.58        | 67             | 1478  | 166.88   | 1           |
| Q12789    | GTF3C1    | 49.69             | 952.54    | 49.69        | 83             | 2109  | 238.72   | 1           |

**Table S2.** DNA and RNA oligo sequences

| siRNA sequences           |                        |
|---------------------------|------------------------|
| Gene                      | Sequence               |
| ANAPC1 human-1 sense      | CCAGAGAACCUUUACCUACUTT |
| ANAPC1 human-1 antisense  | AGUAGGUAAGGUUCUCUGGTT  |
| ANAPC1 human-2 sense      | GCUCCAGUUACGCUGUGUAATT |
| ANAPC1 human-2 antisense  | UUACACAGCGUAACUGGAGCTT |
| sgRNA targetting sequence |                        |
| Target                    | Sequence               |
| SIRT6 human-1             | GTACGTCCGAGACACAGTCG   |
| SIRT6 human-2             | CTCCACAAACATGTTCCCG    |
| Primes for real-time PCR  |                        |
| Primer                    | Sequence               |
| actin-qF60.8              | CATGTACGTTGCTATCCAGGC  |
| actin-qR60.2              | CTCCTTAATGTCACGCACGAT  |
| FZR1-qF62.7               | GACCGCTGTATCCGCTTCTG   |
| FZR1-qR62.9               | GGTCAGGGAGGGGTACTTCC   |

Original images

# Original images of western blots of p<sup>H3</sup>@S10 and Cyc B1 in figure 1b 293T

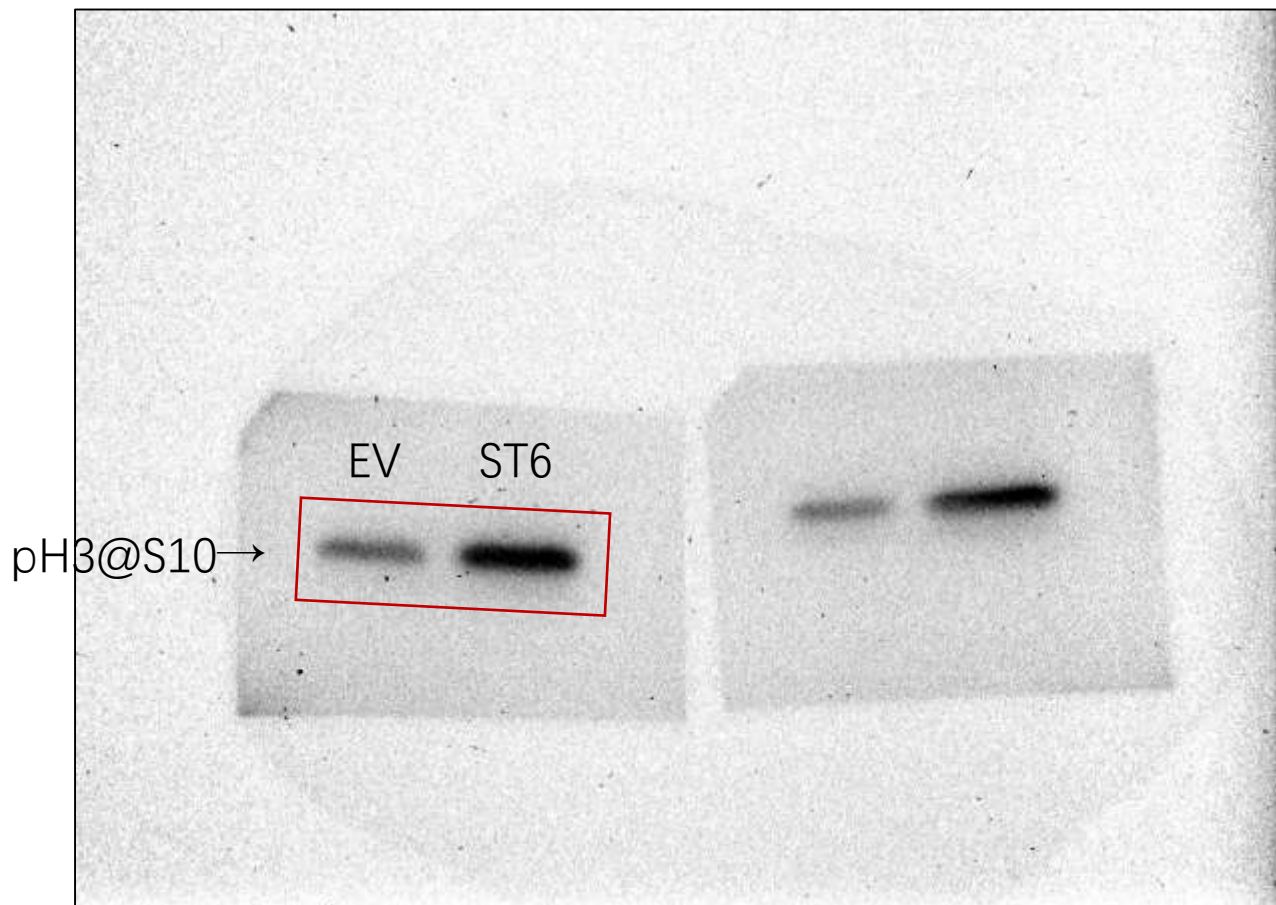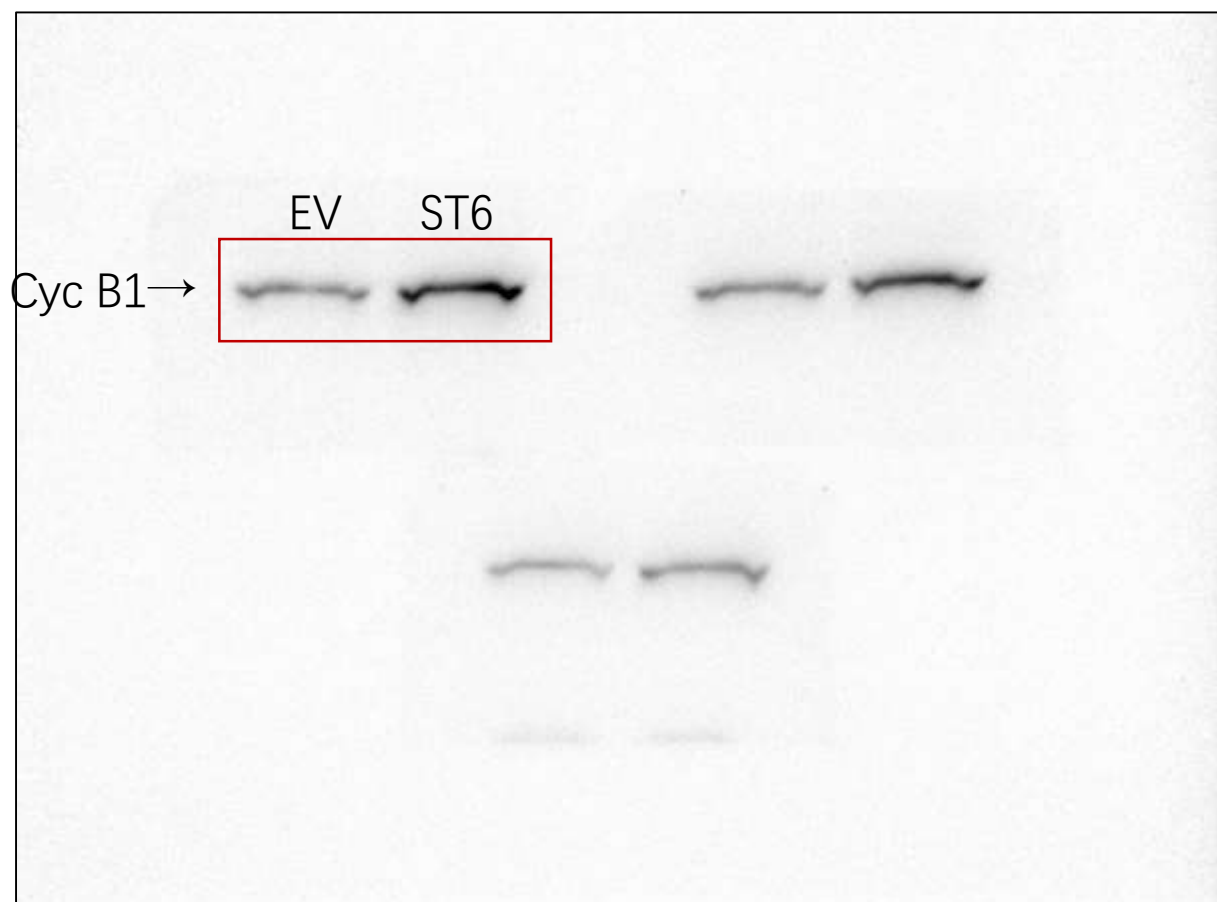

# Original images of western blots of SIRT6-FLAG and HSP70 in figure 1b 293T

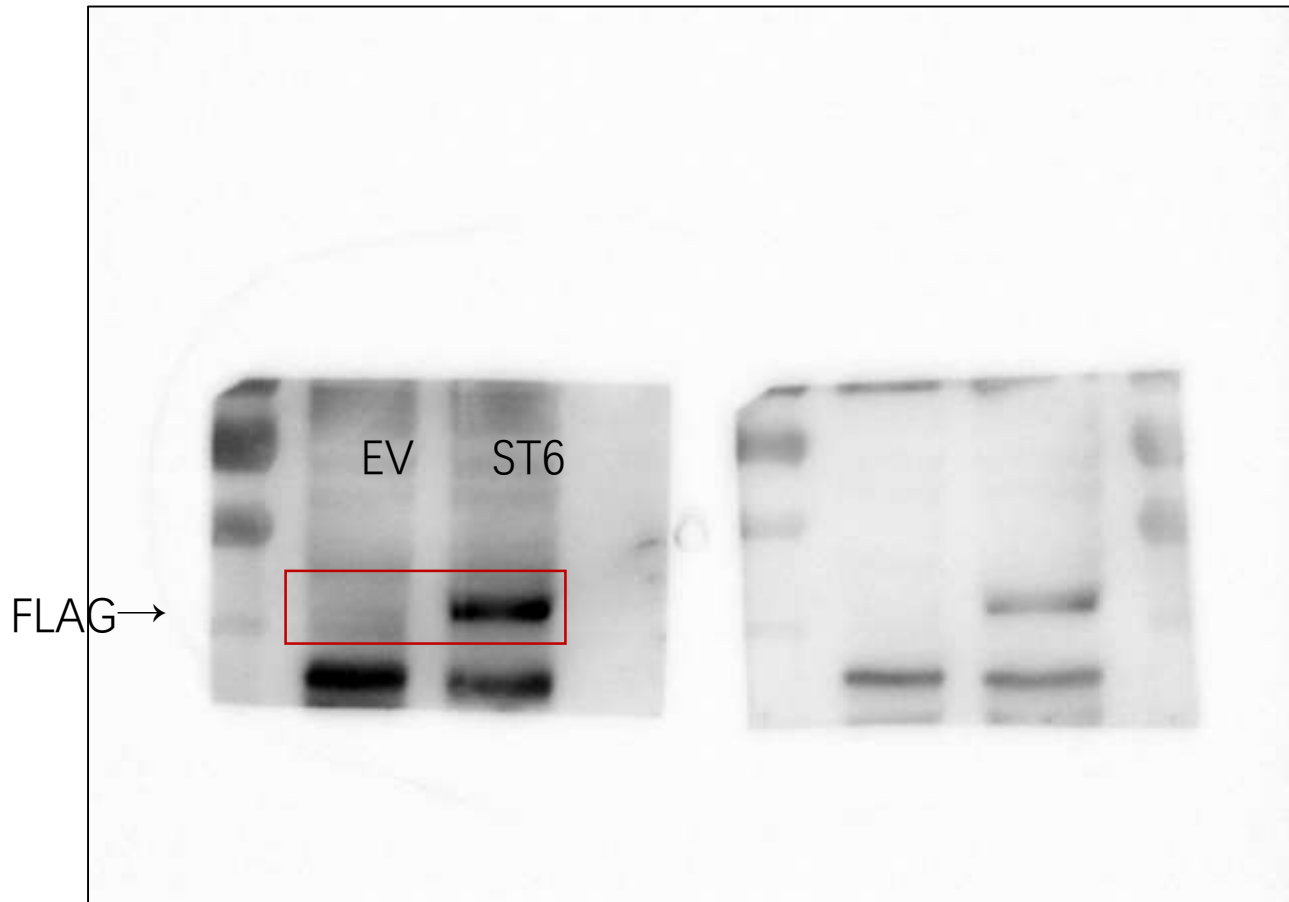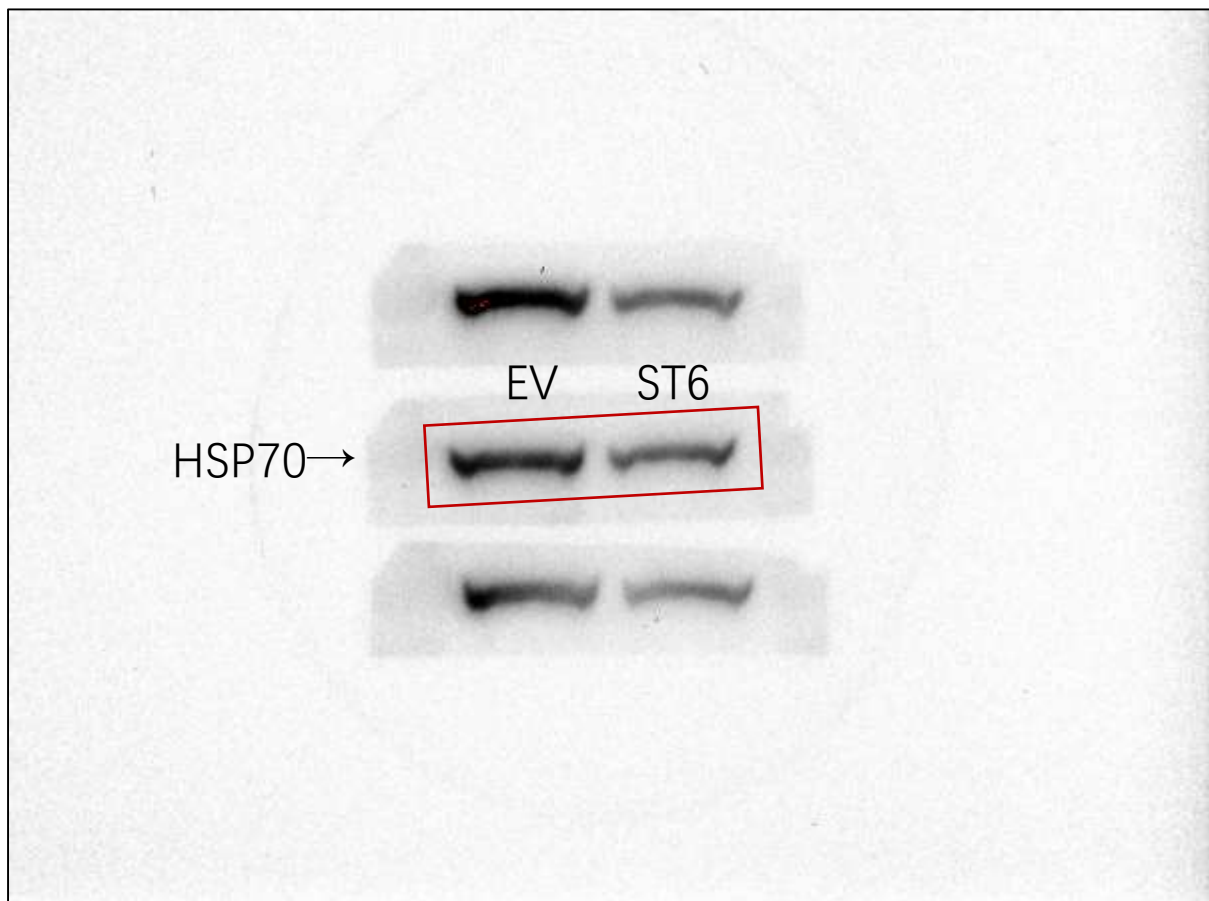

Original images of western blots of p $H3@S10$  and Cyc B1 in figure 1b HeLa

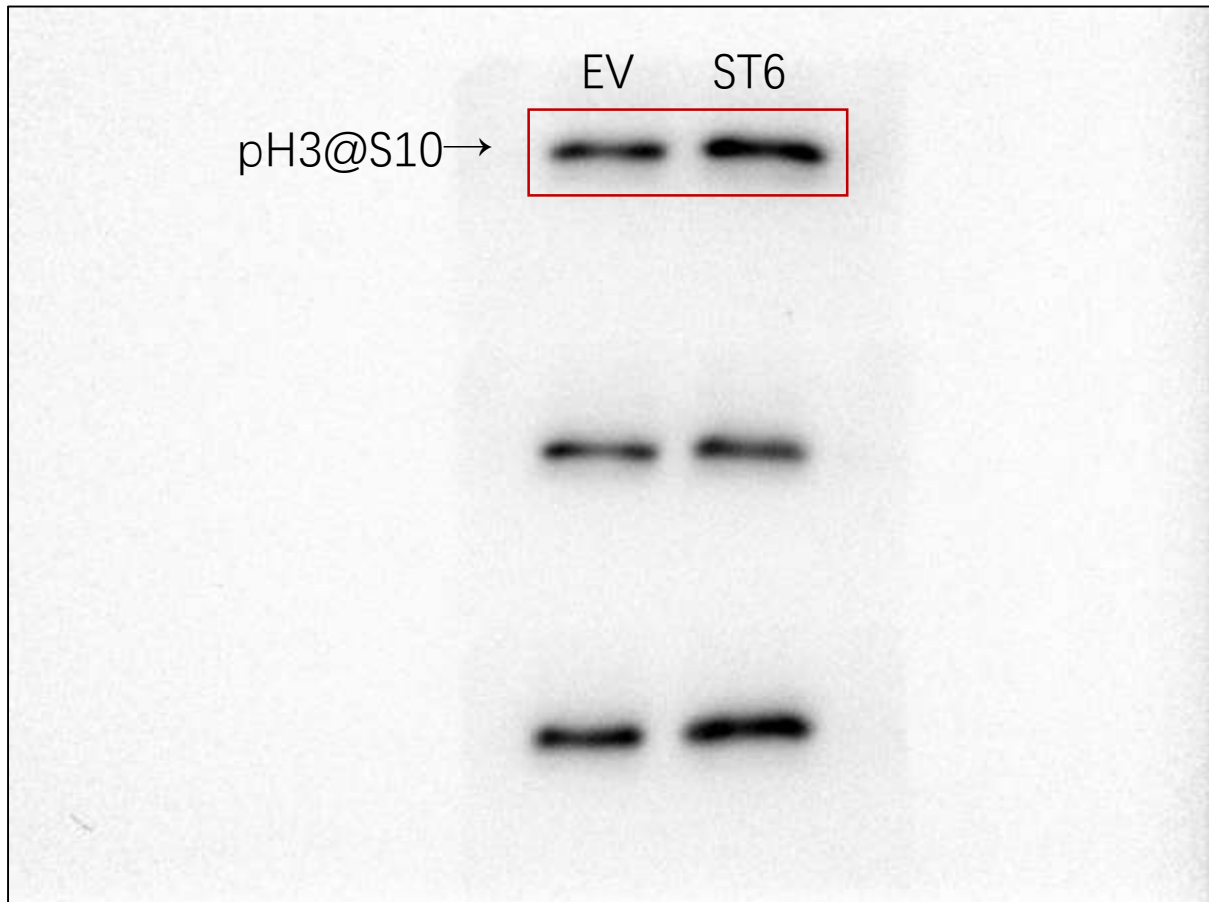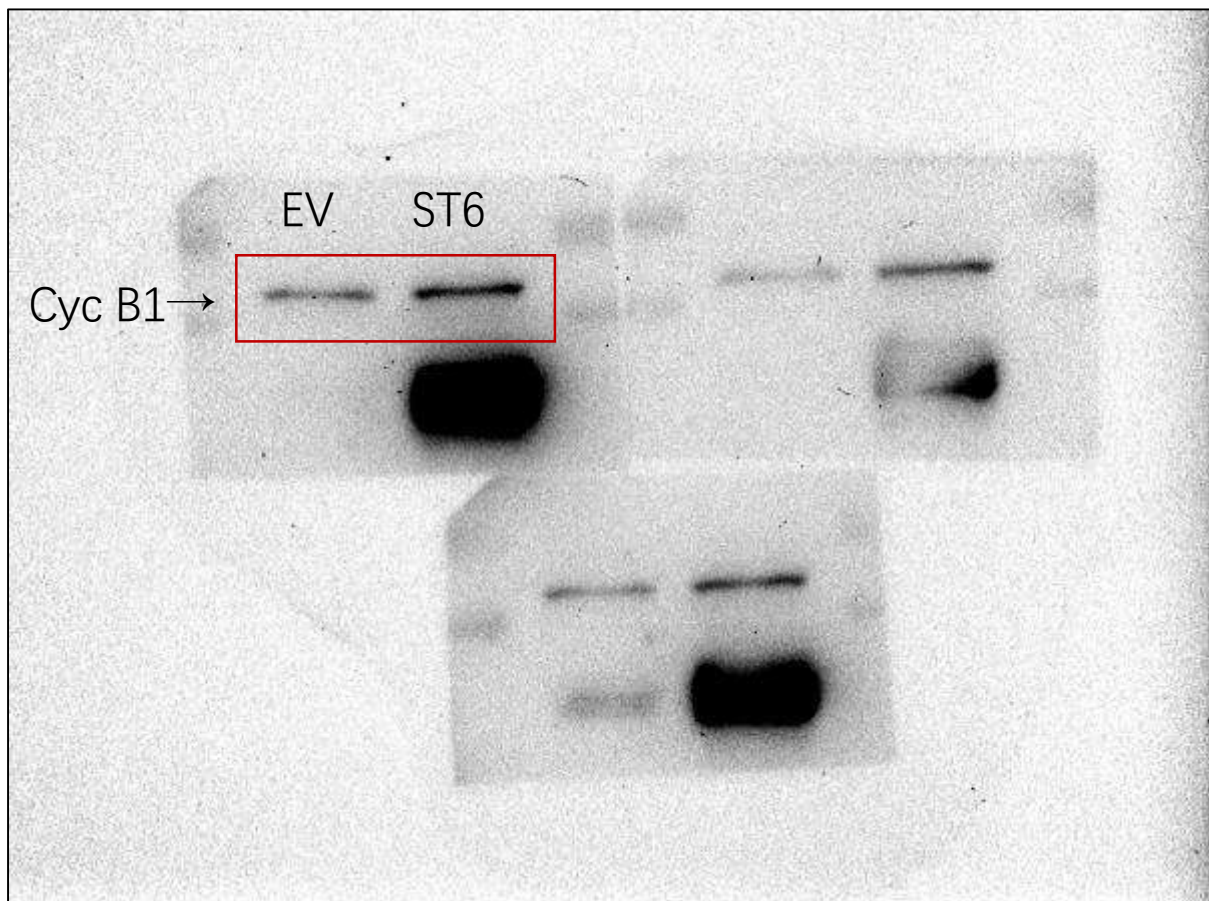

# Original images of western blots of SIRT6-FLAG and HSP70 in figure 1b HeLa

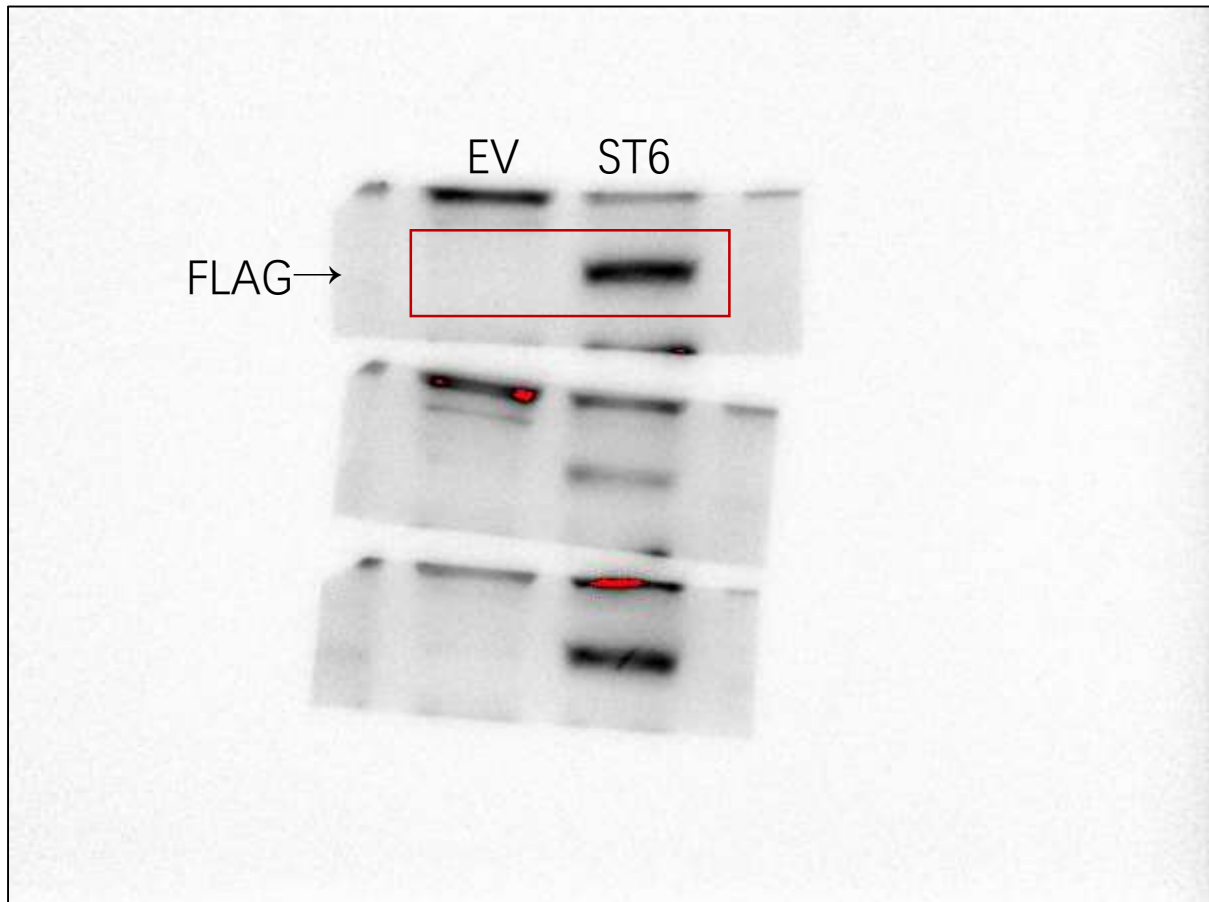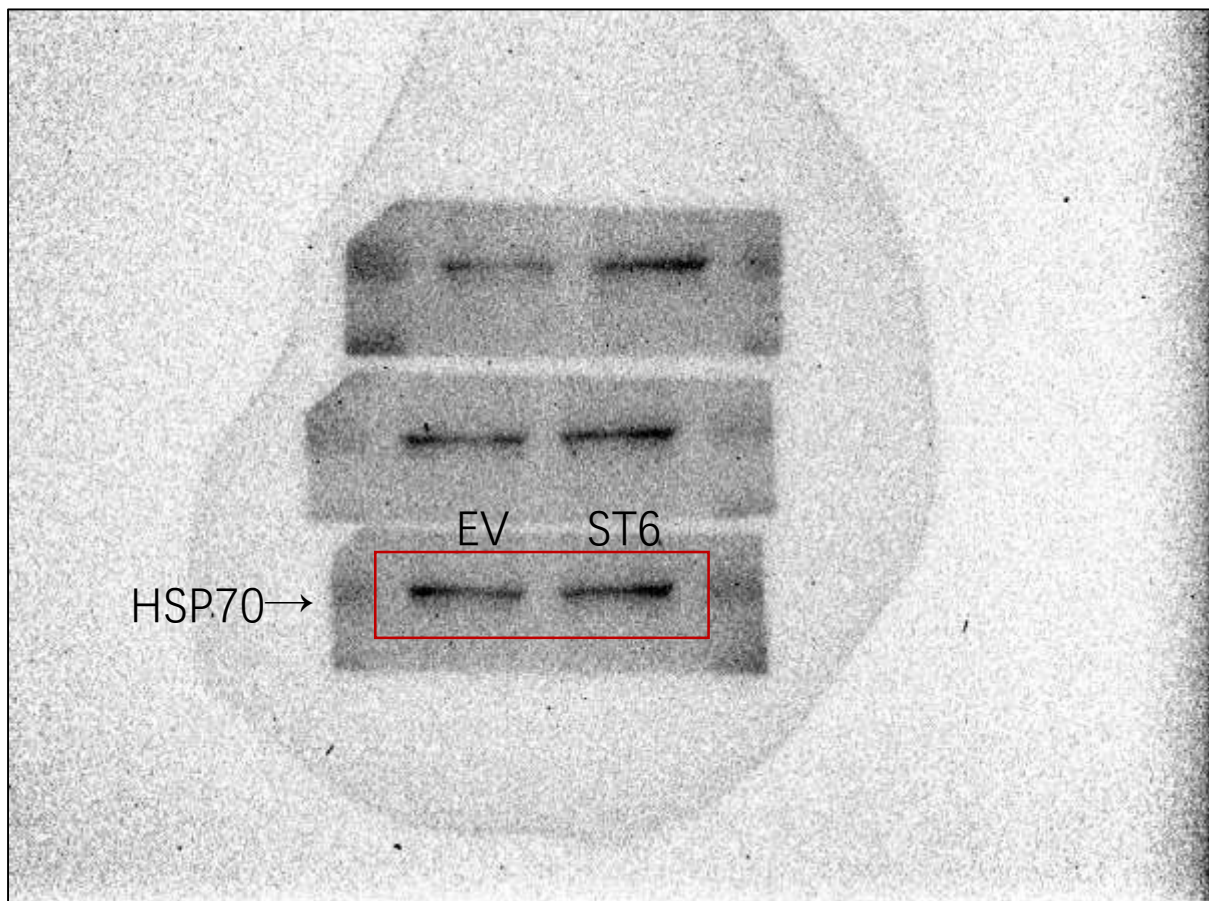

# Original images of western blots of APC1 and CDC27 (long exposure) in figure 2a

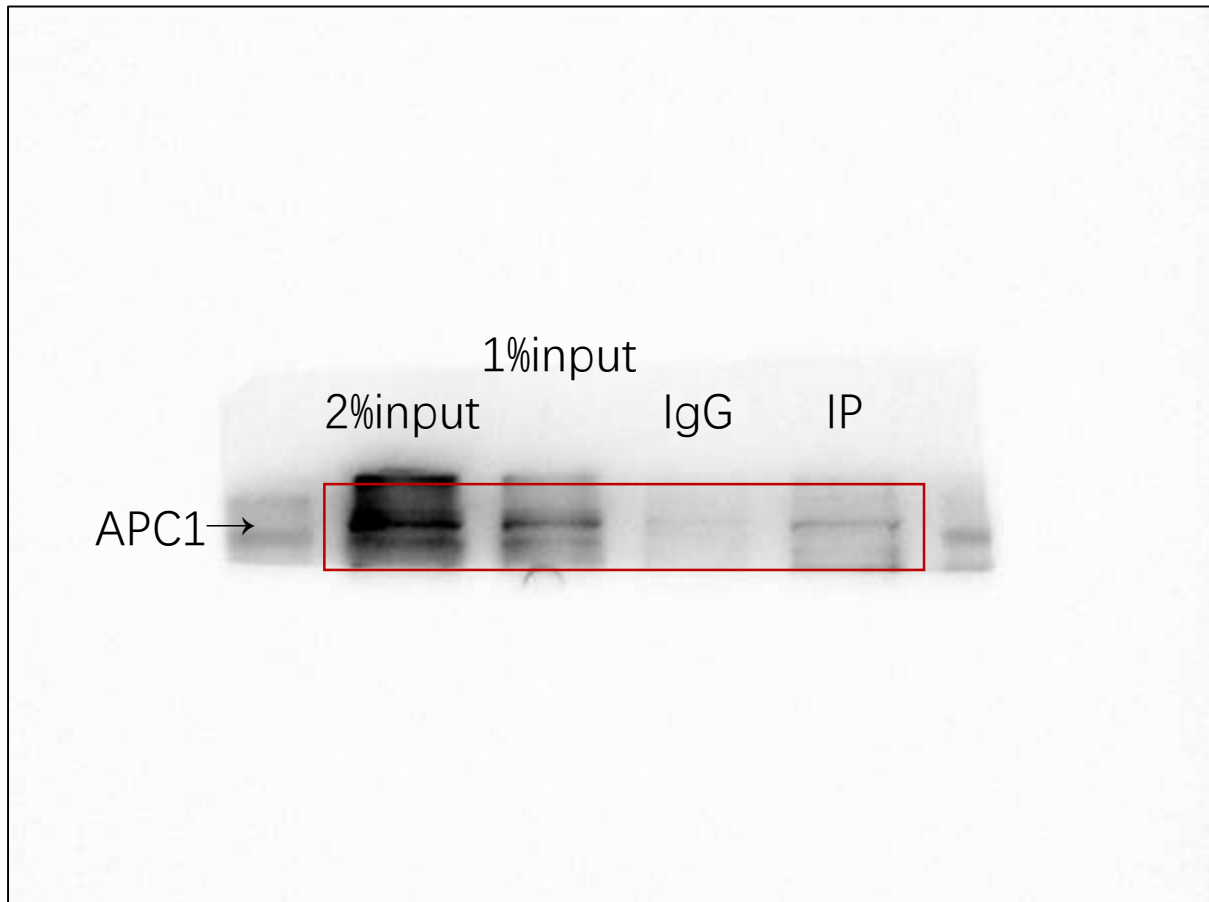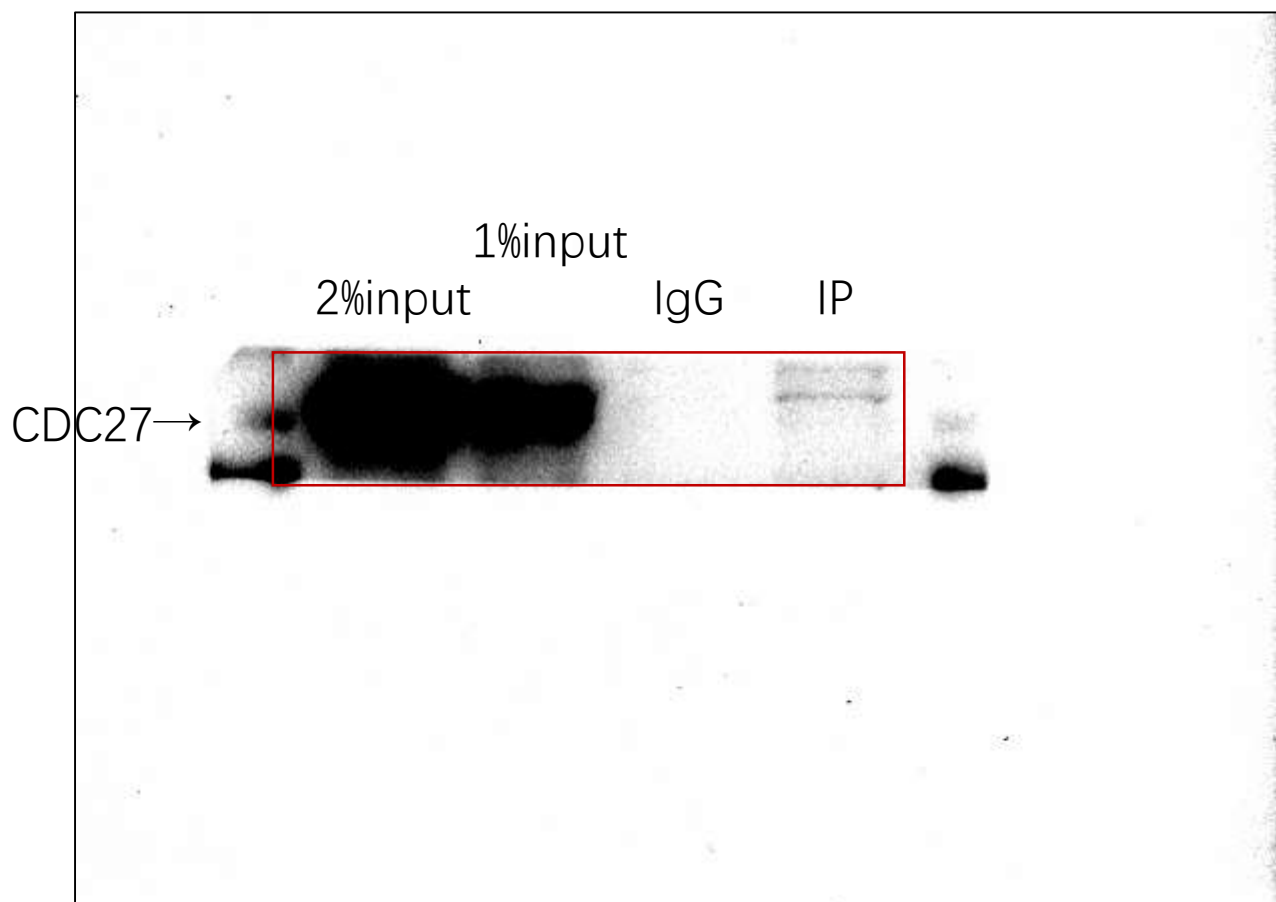



Original images of western blots of CDC27 (short exposure) in figure 2a

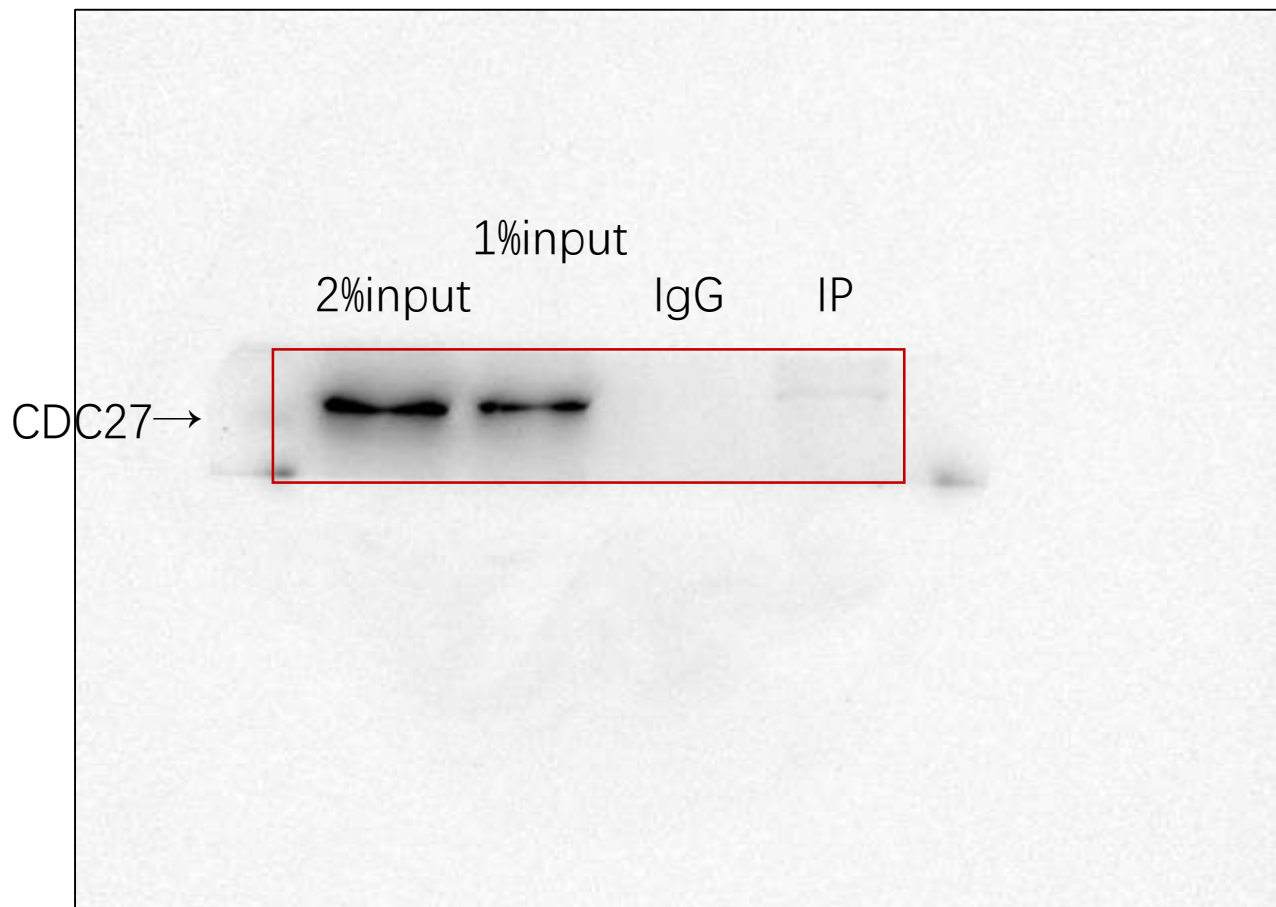

# Original images of western blots of CDC20 and CDH1 in figure 2a

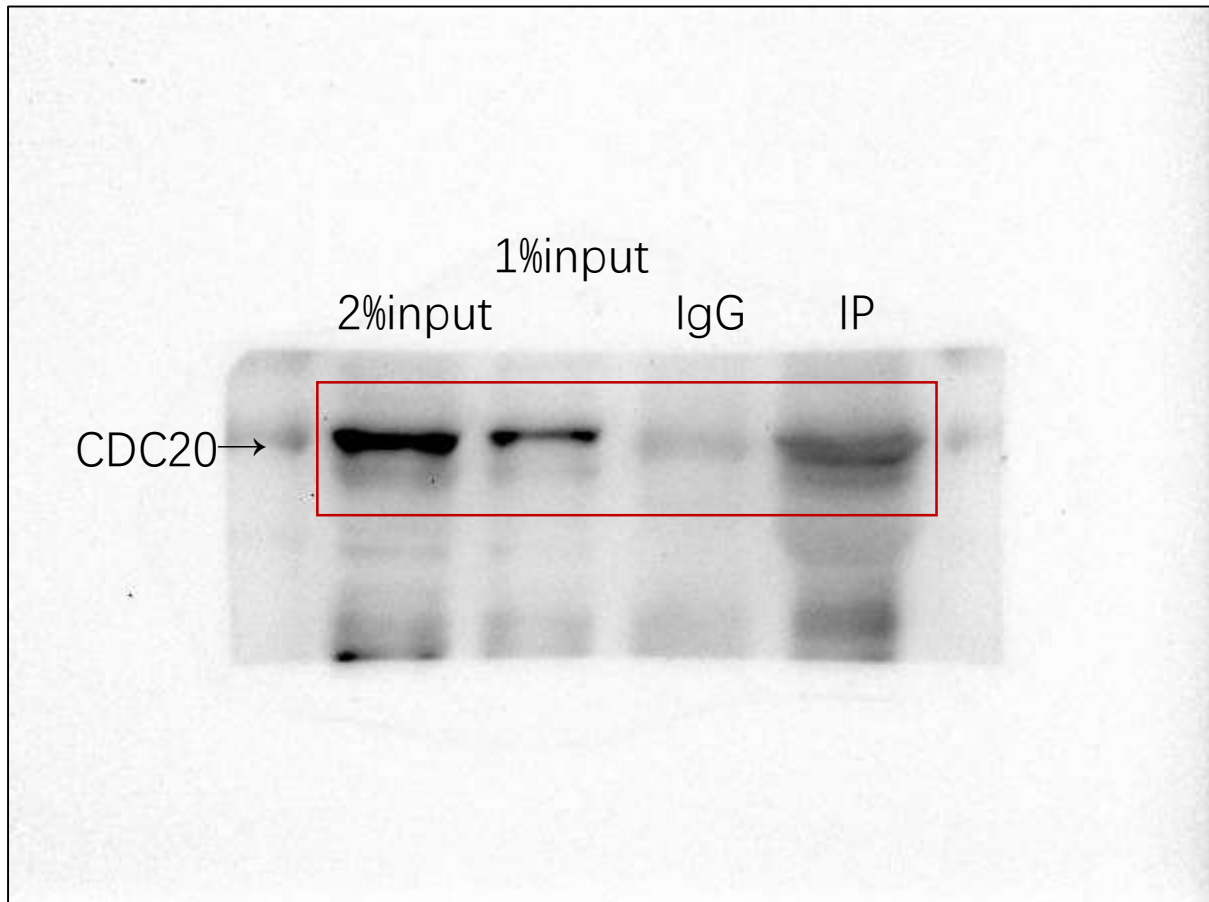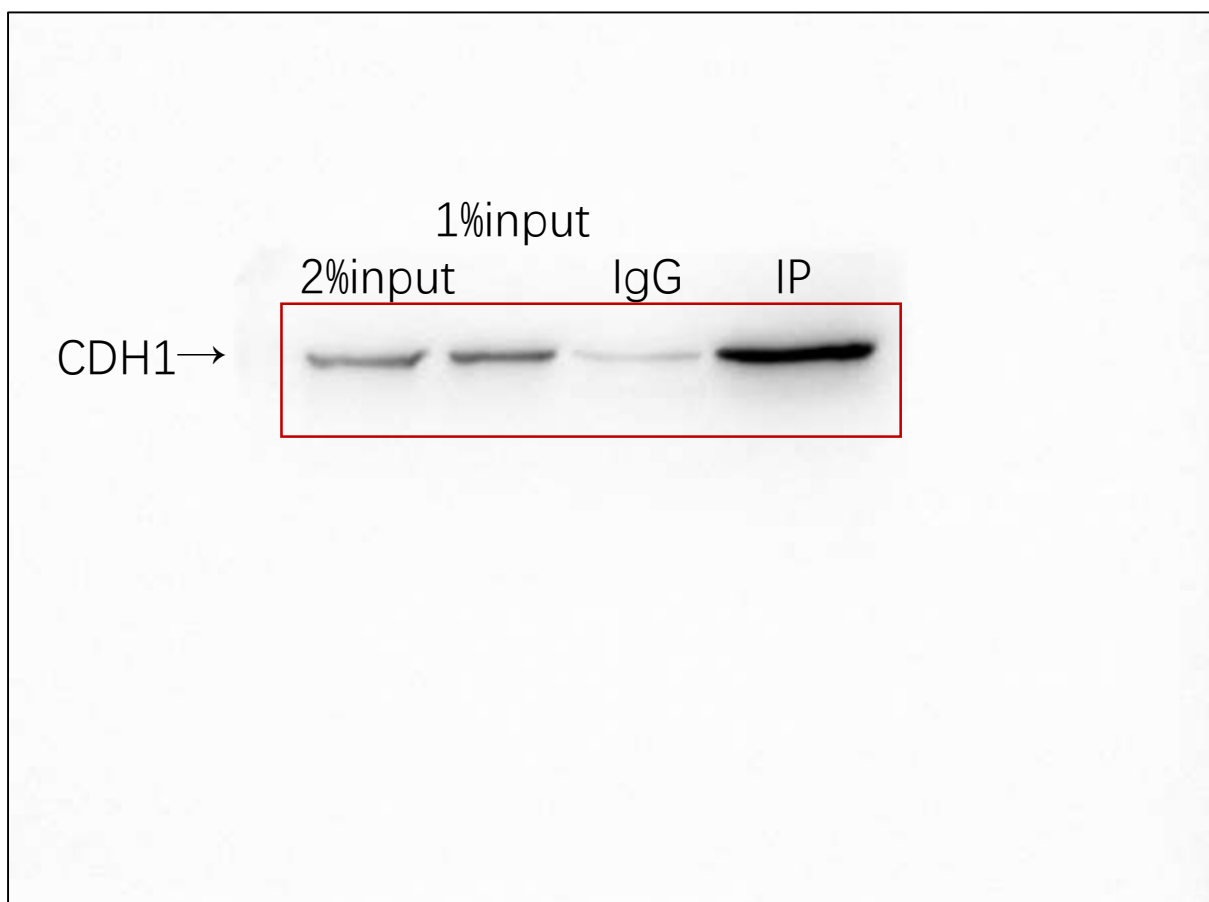

Original images of western blots of SIRT6 in figure 2a

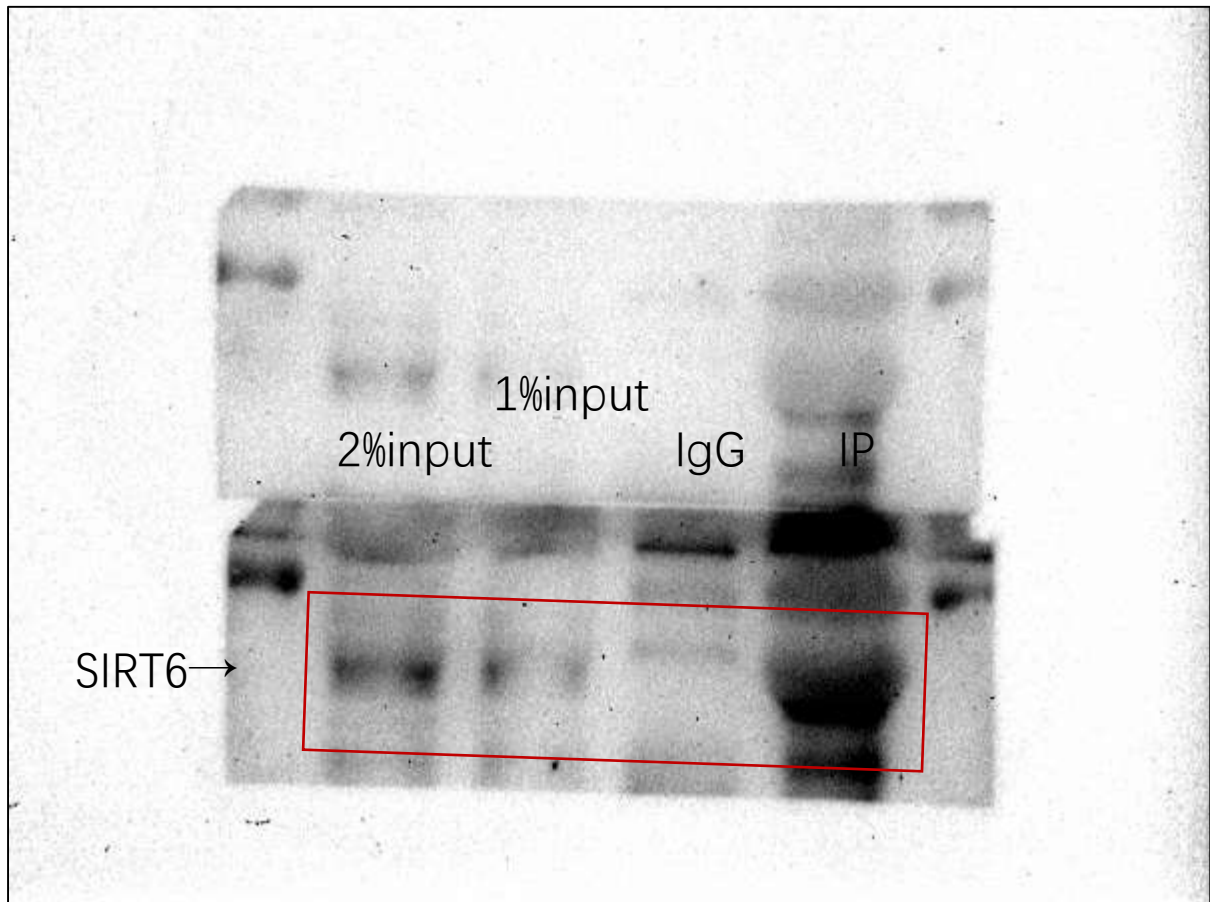

# Original images of western blots of SIRT6 and APC1 in figure 2b

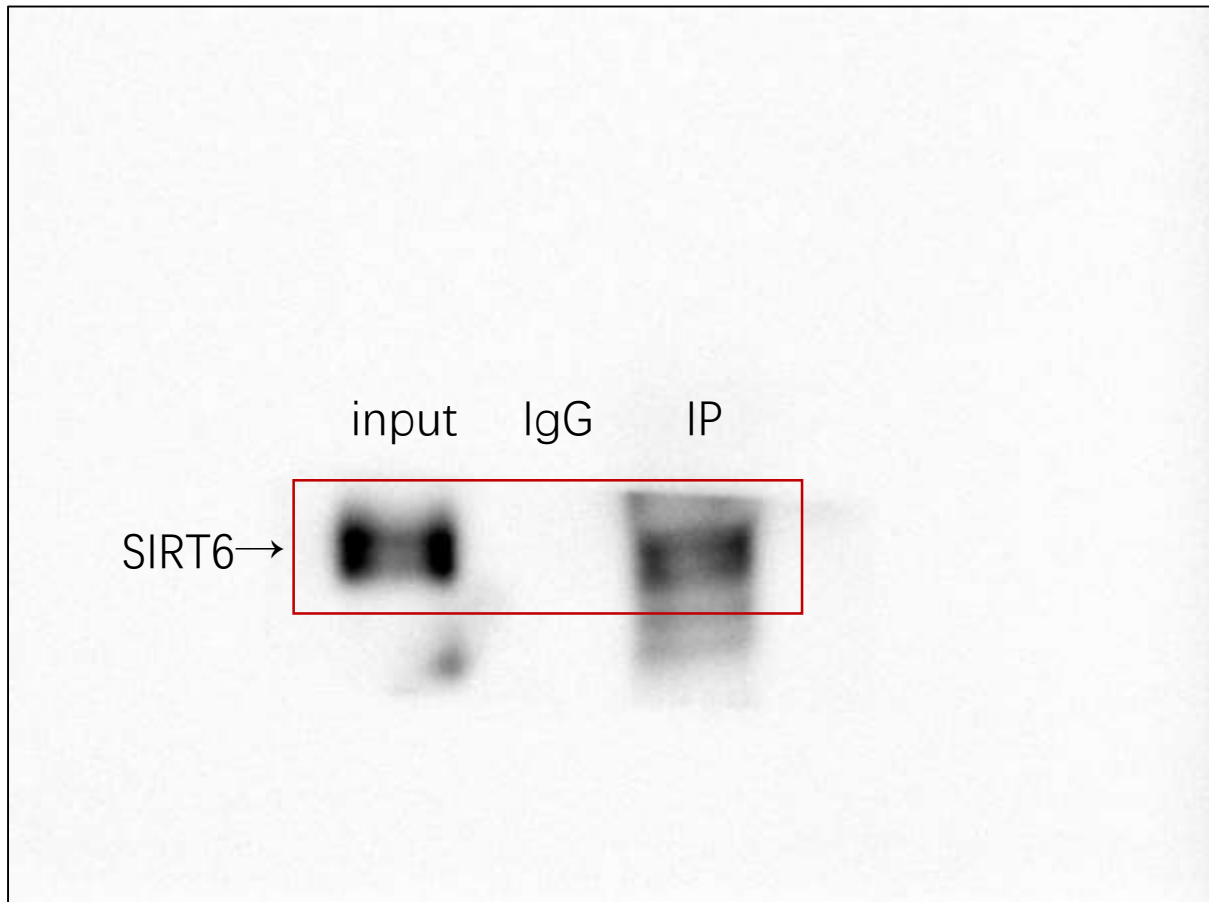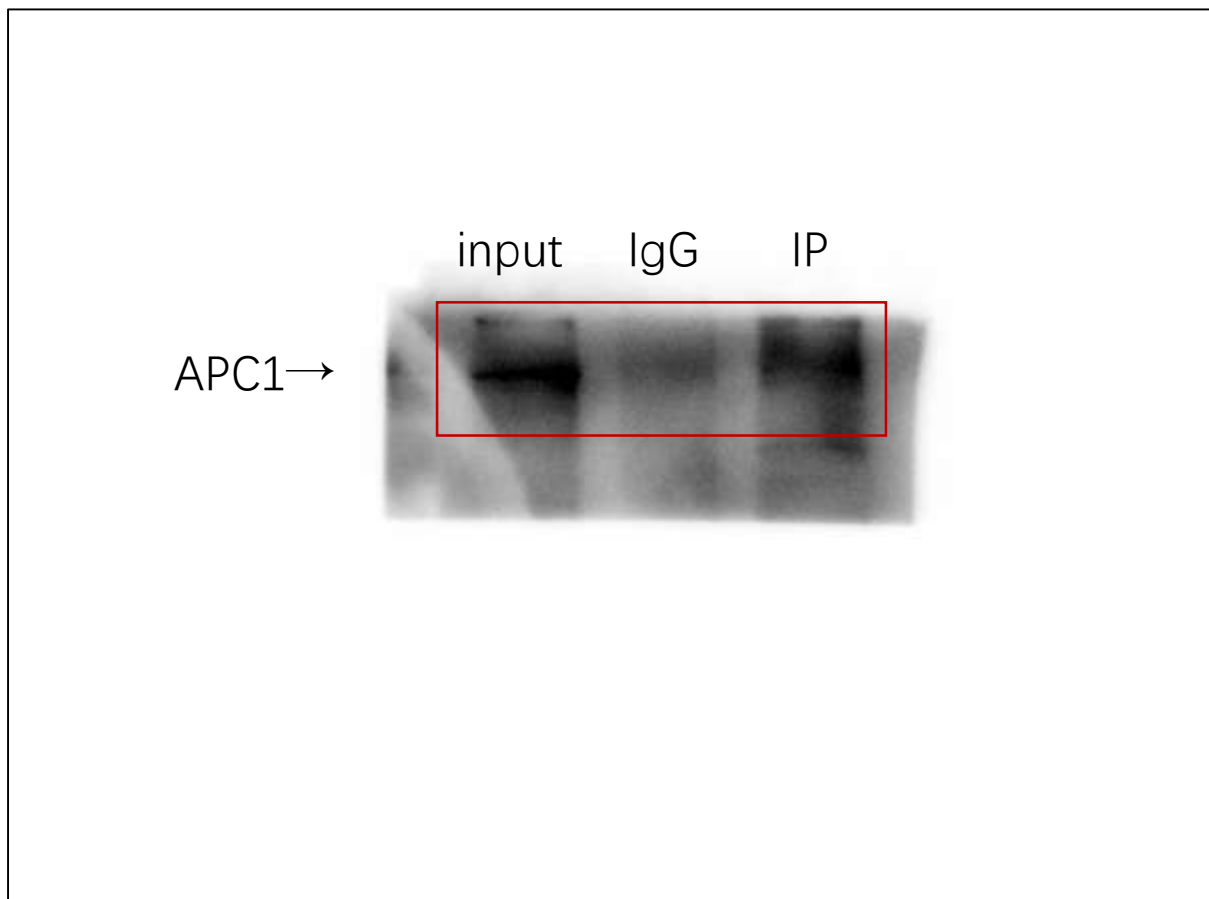

# Original images of western blots of SIRT6 and CDC20 in figure 2c

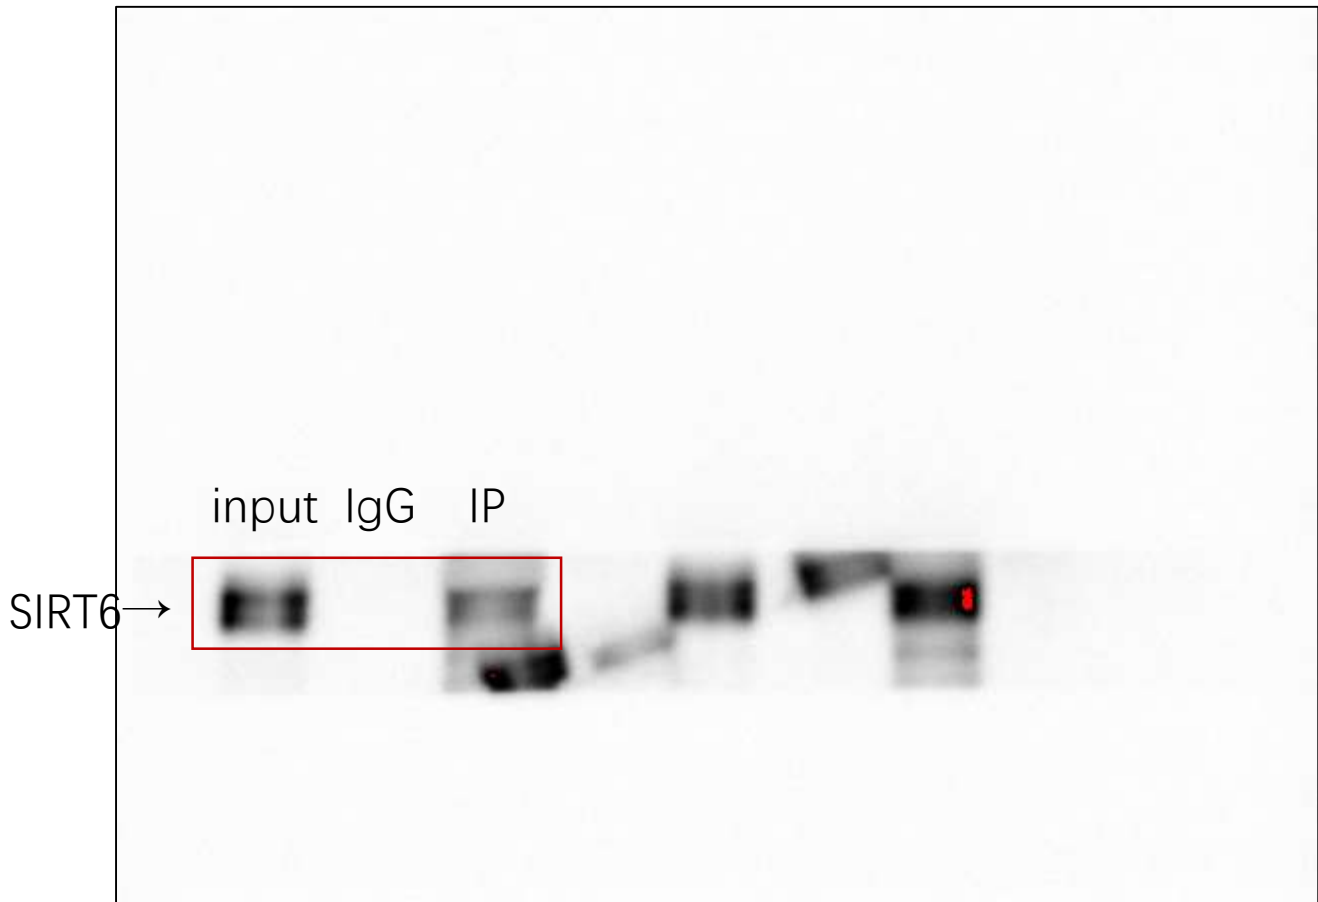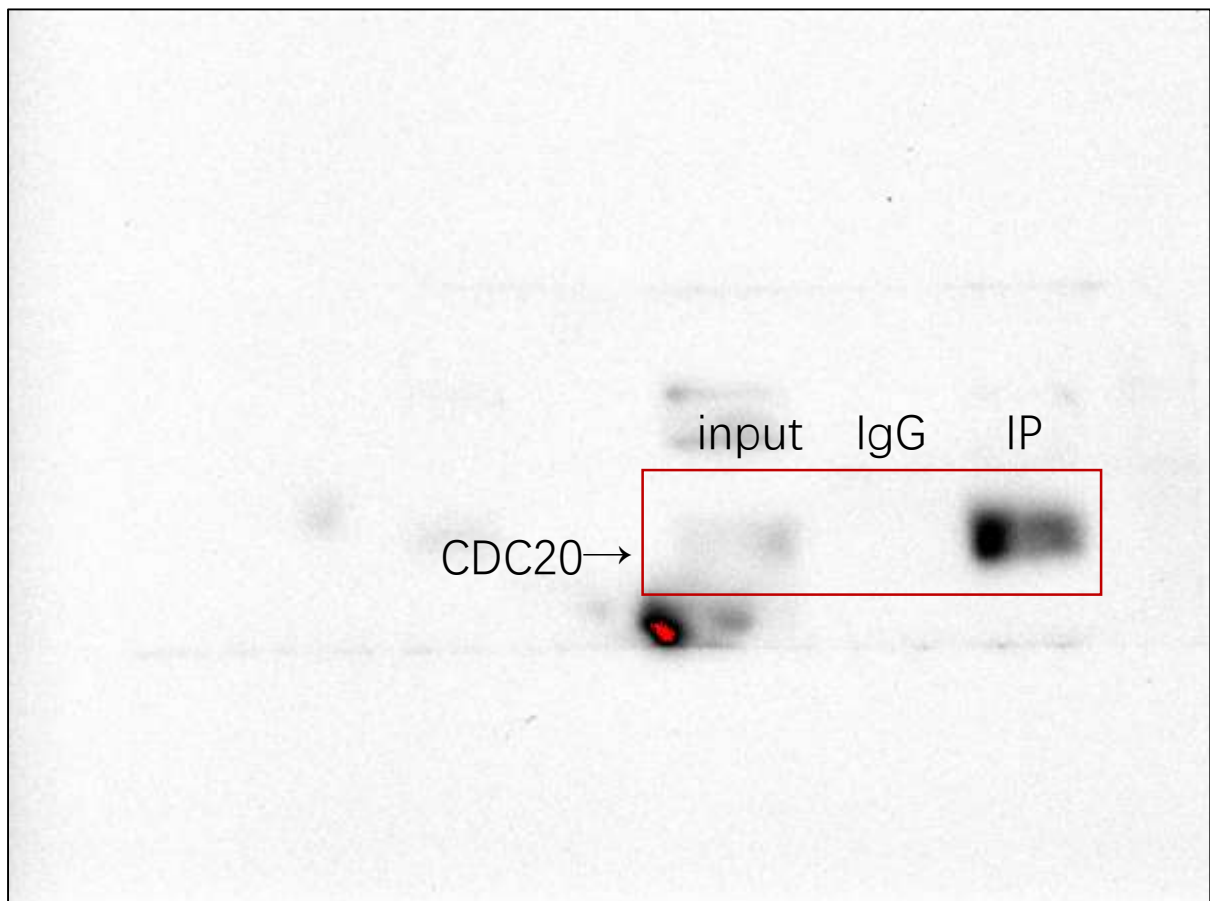

# Original images of western blots of SIRT6 and CDH1 in figure 2d

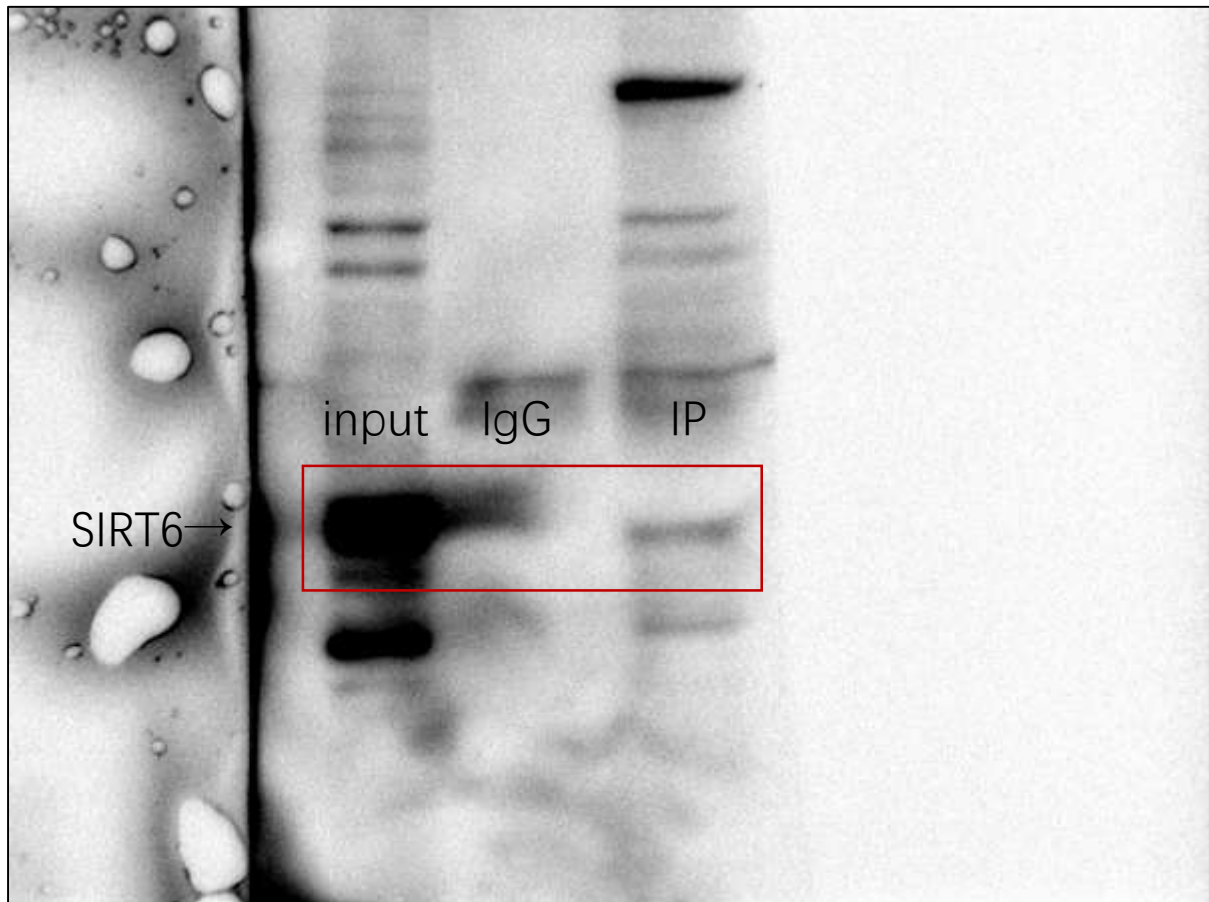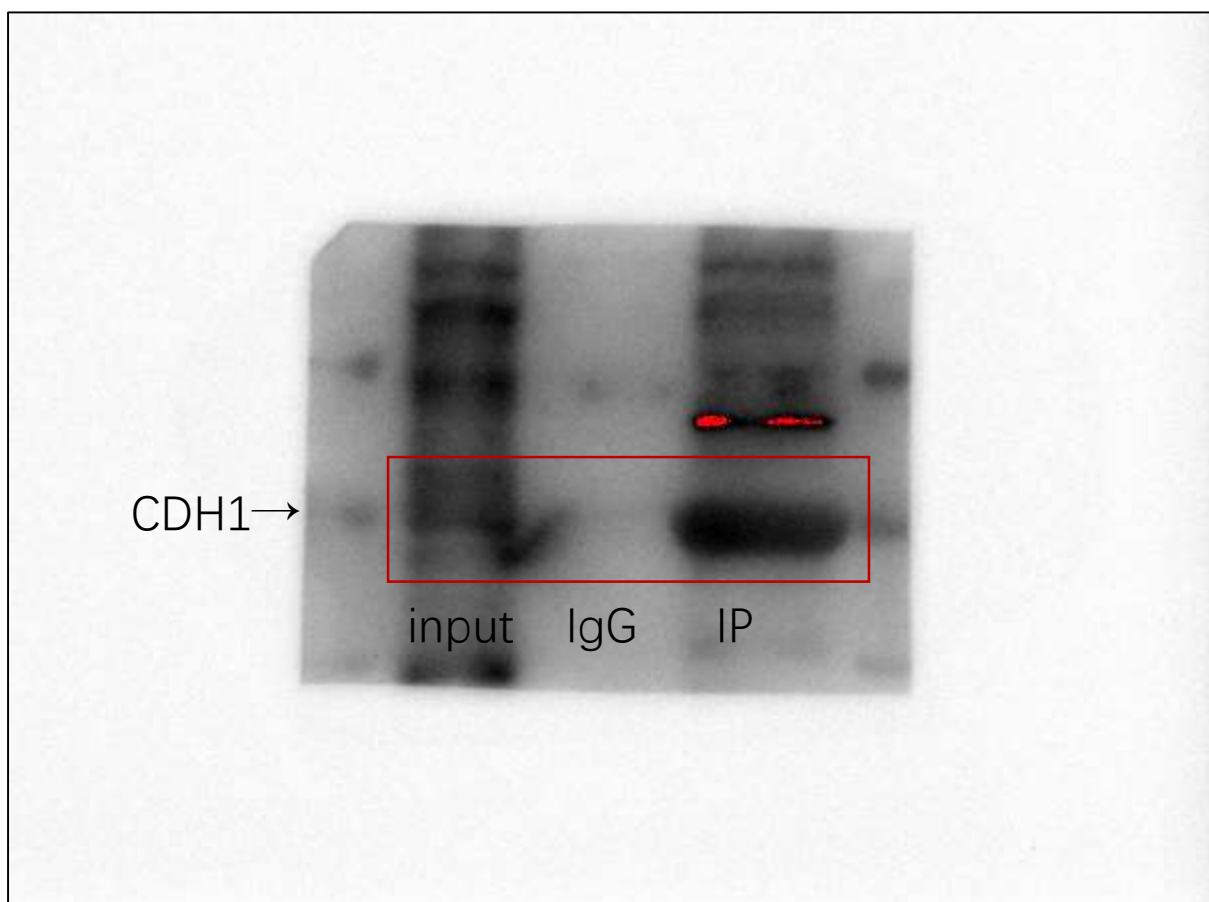

# Original images of western blots of SIRT6-FLAG and CDC20 in figure 2e

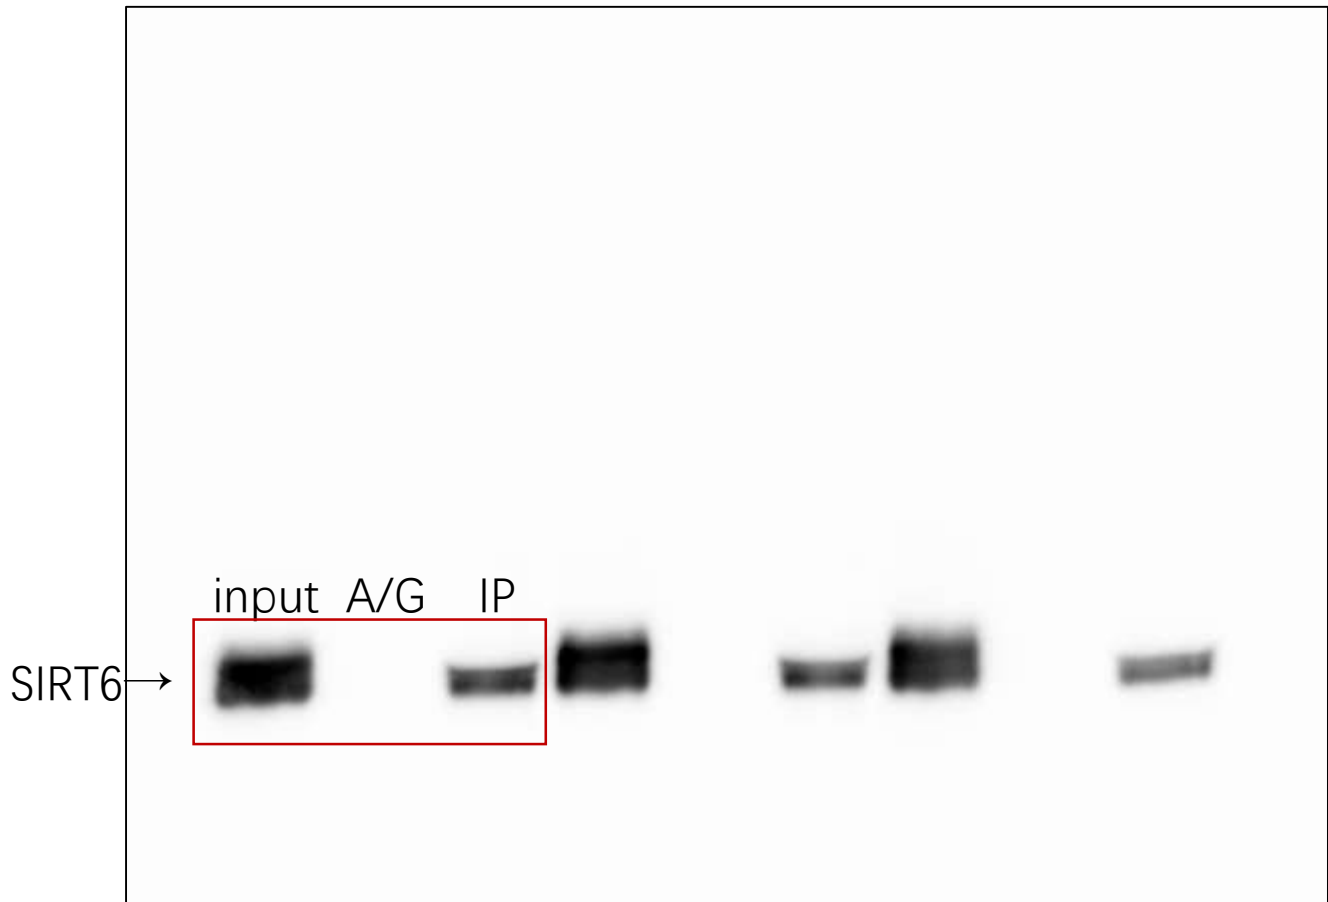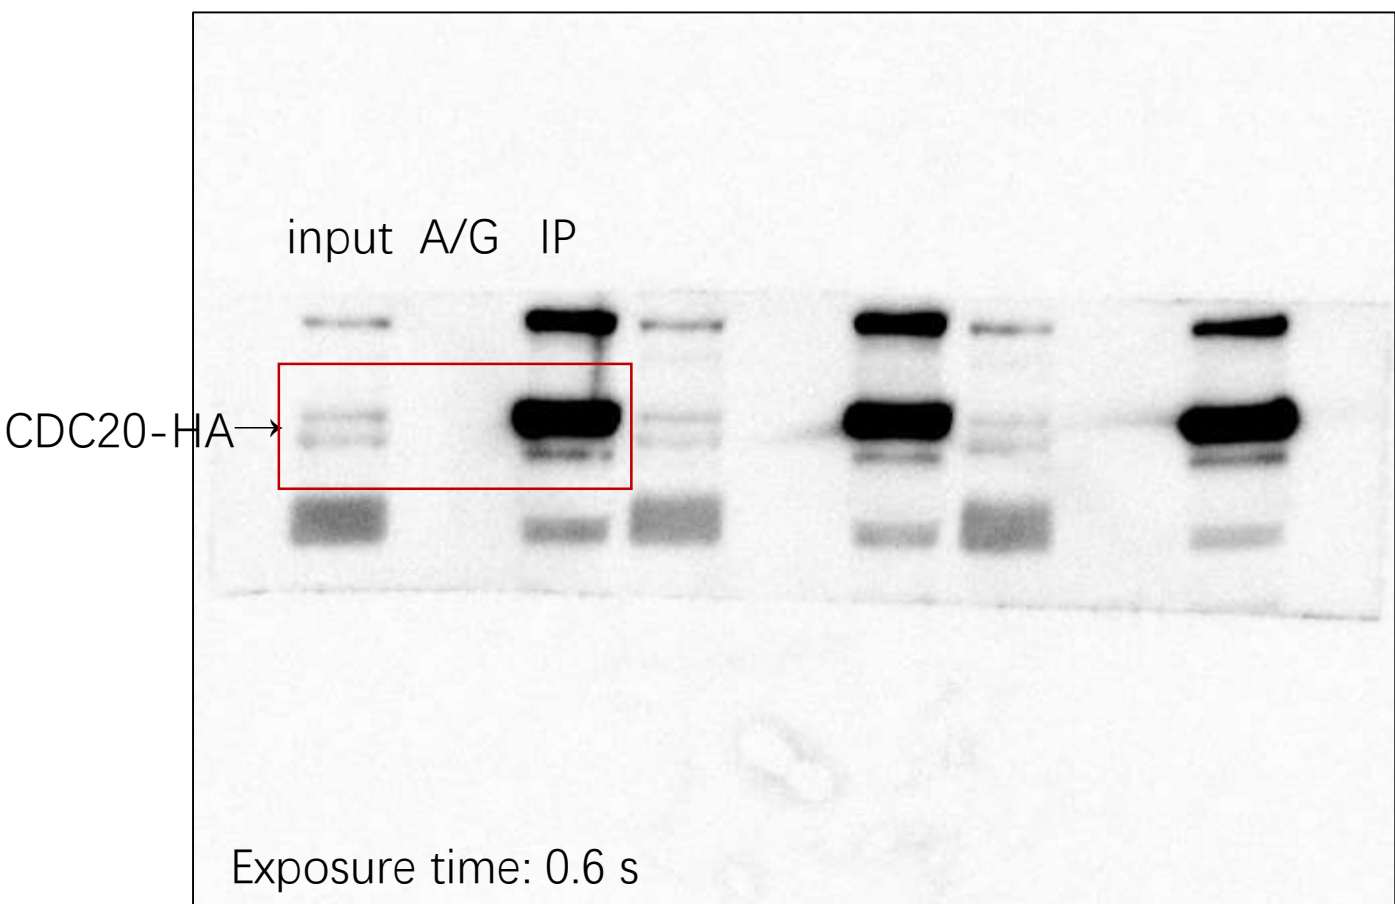

Original images of western blots of CDC20 with short exposure time in figure 2e

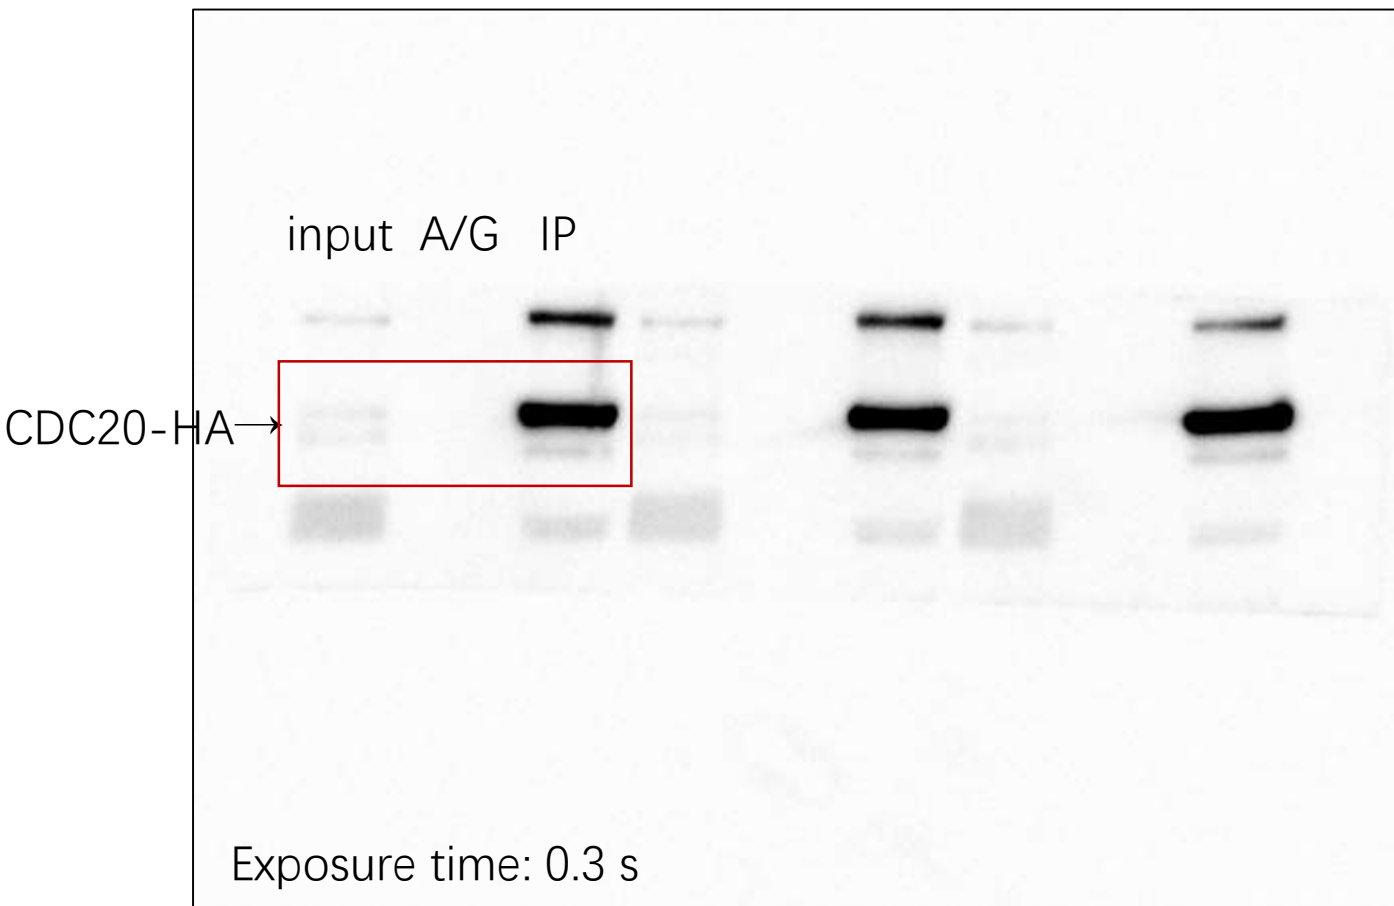



# Original images of western blots of SIRT6-FLAG and CDH1 in figure 2f

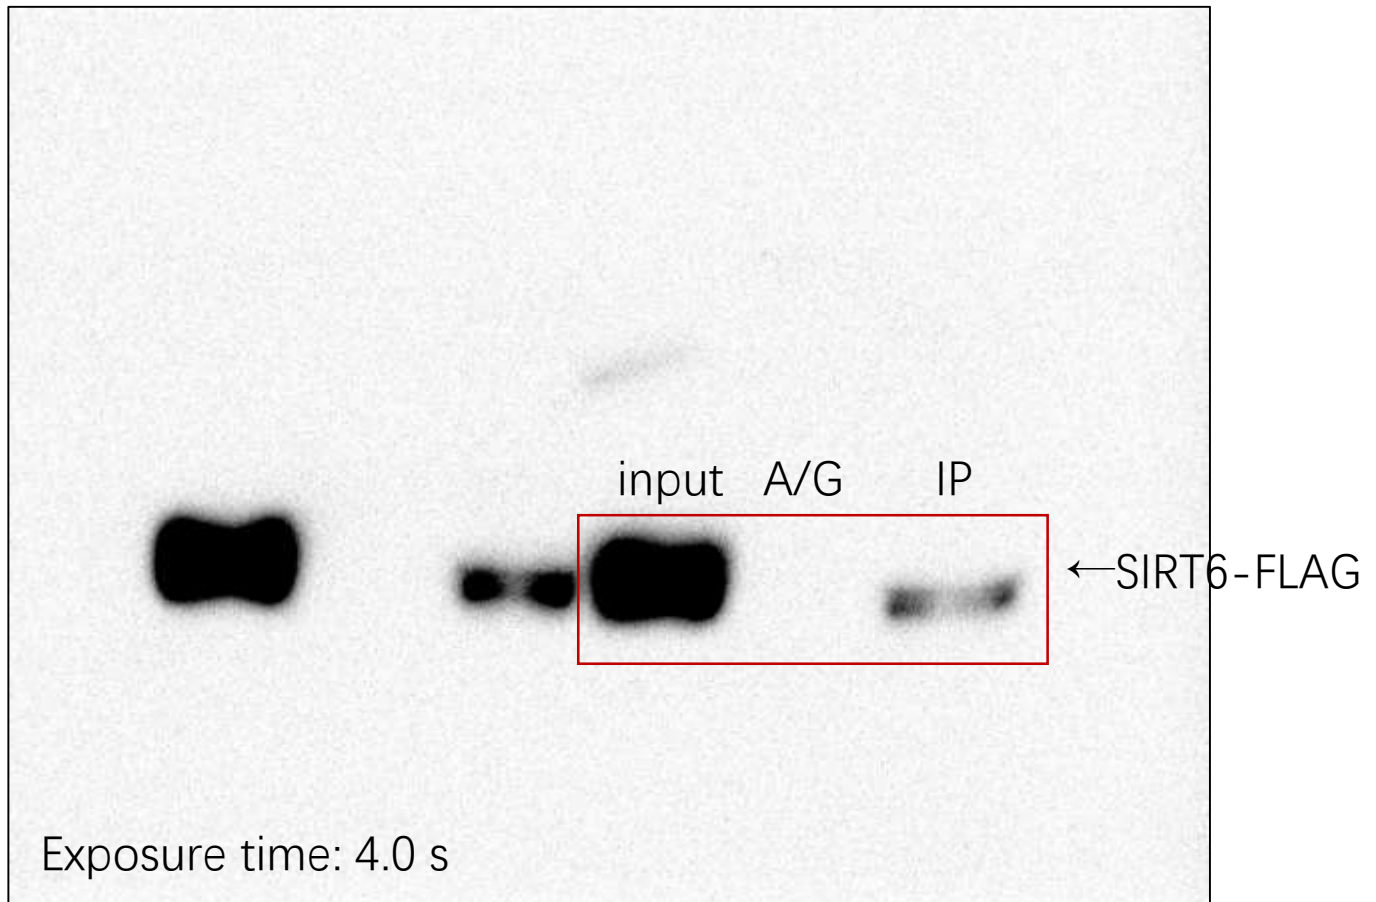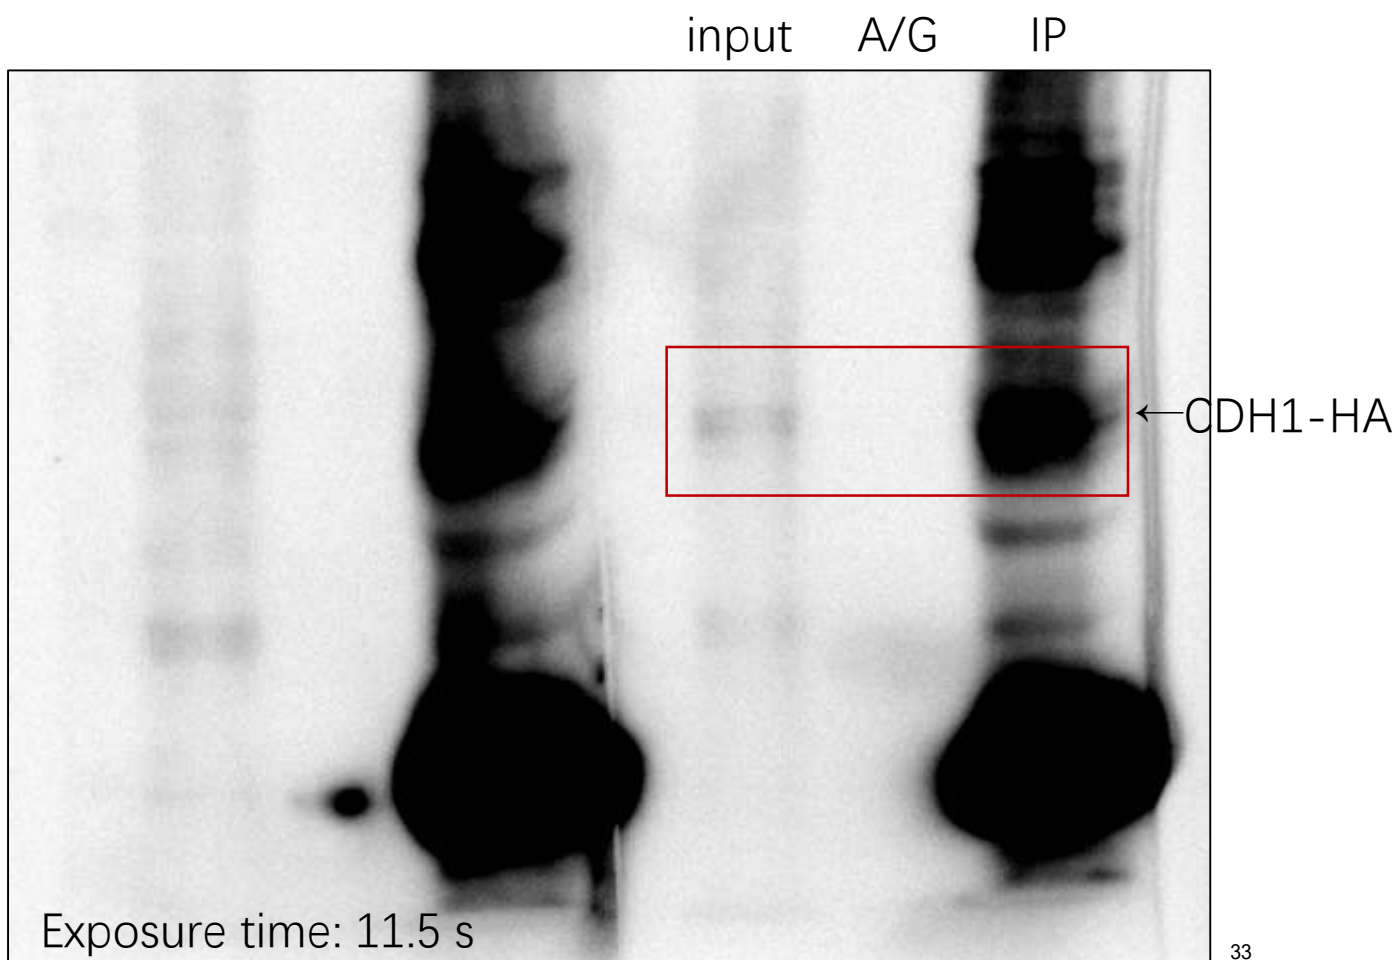

# Original images of western blots of SIRT6-FLAG and CDH1 in figure 2f

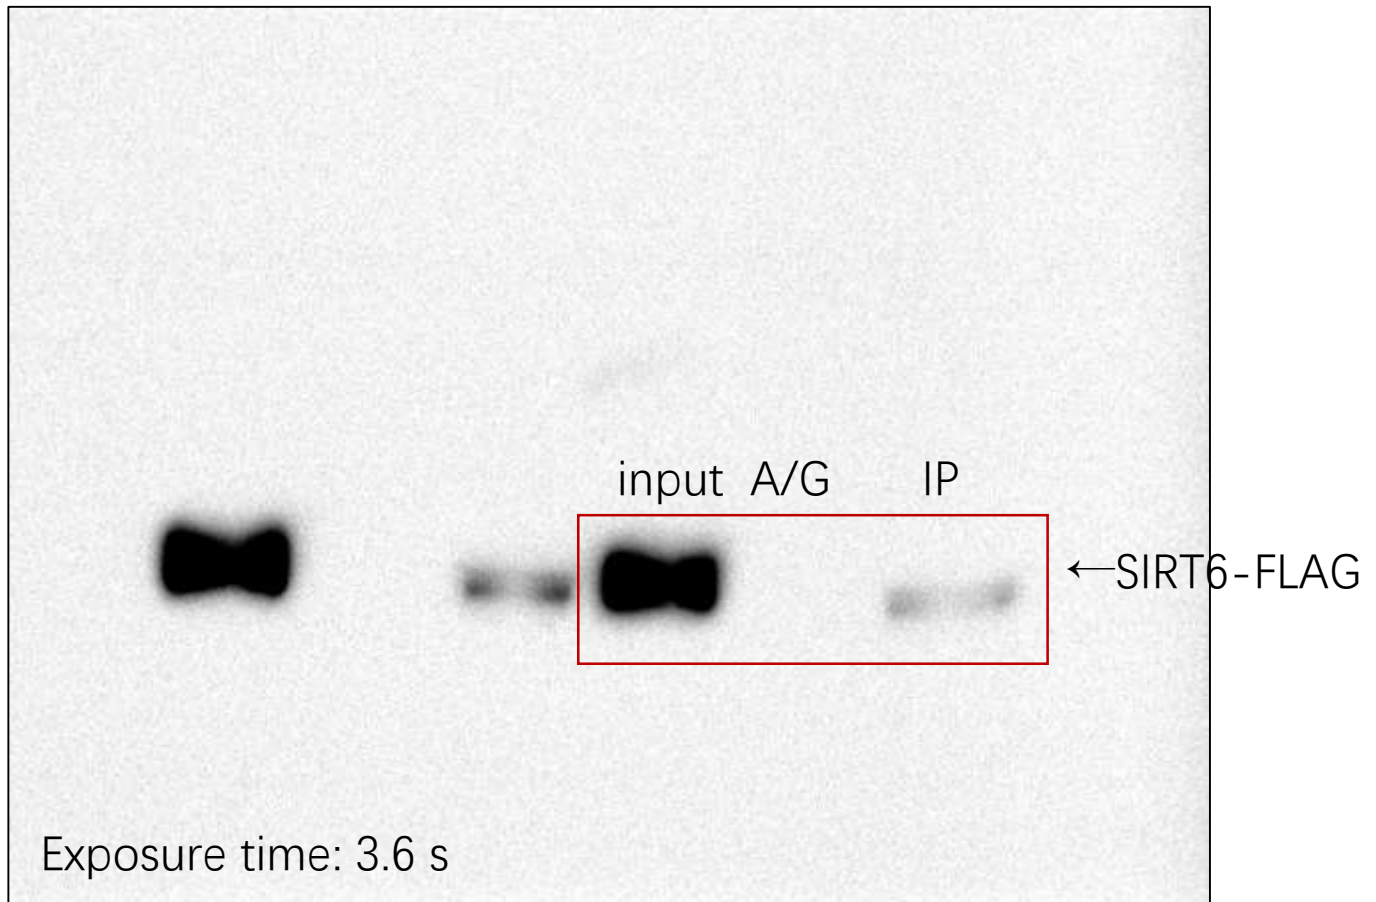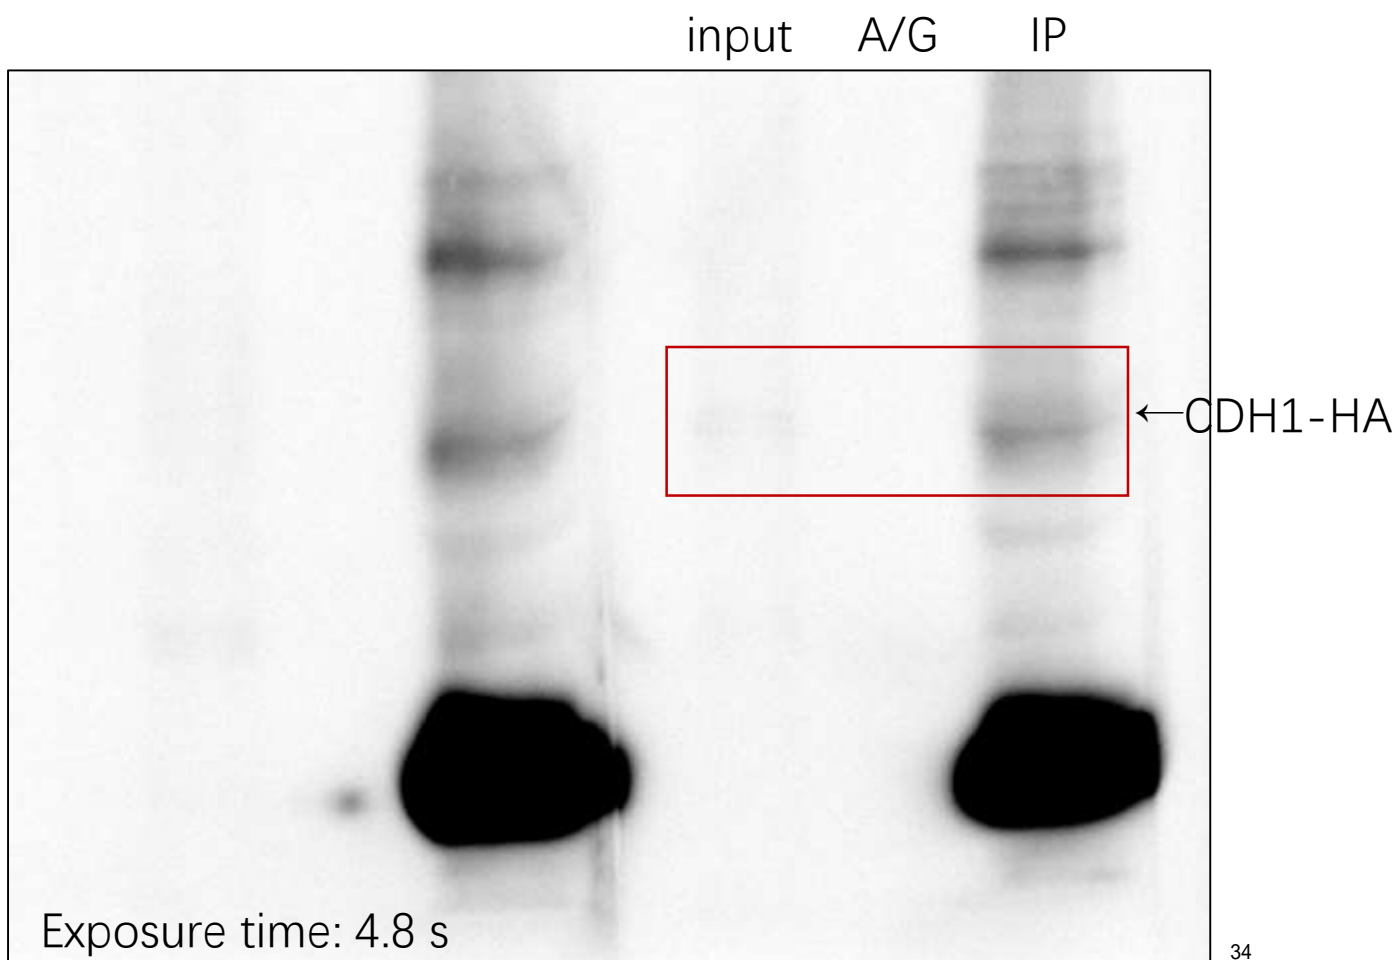

# Original images of western blots of SIRT6 and securin in figure 3a

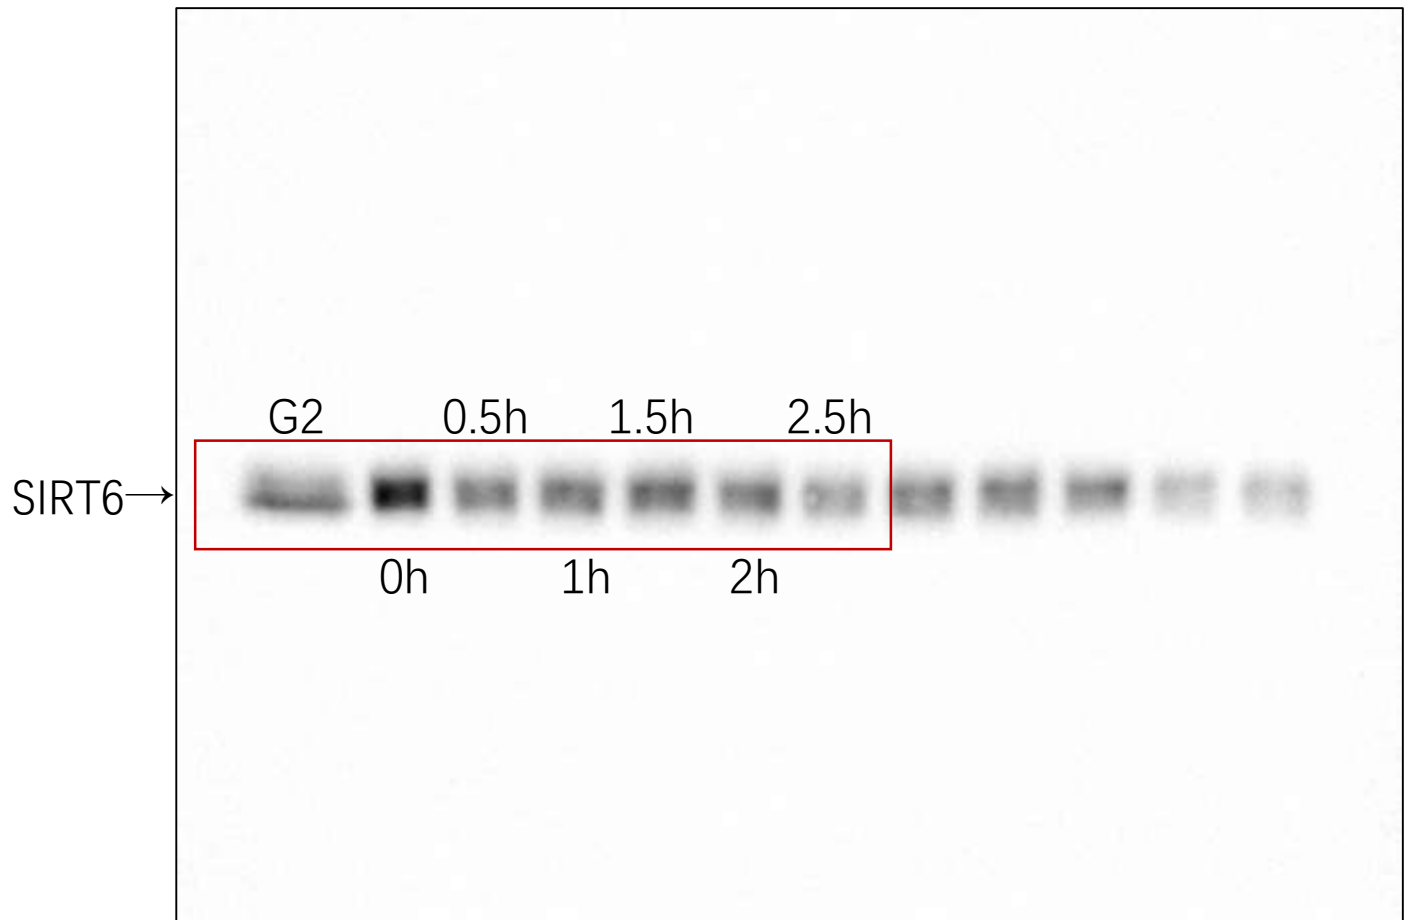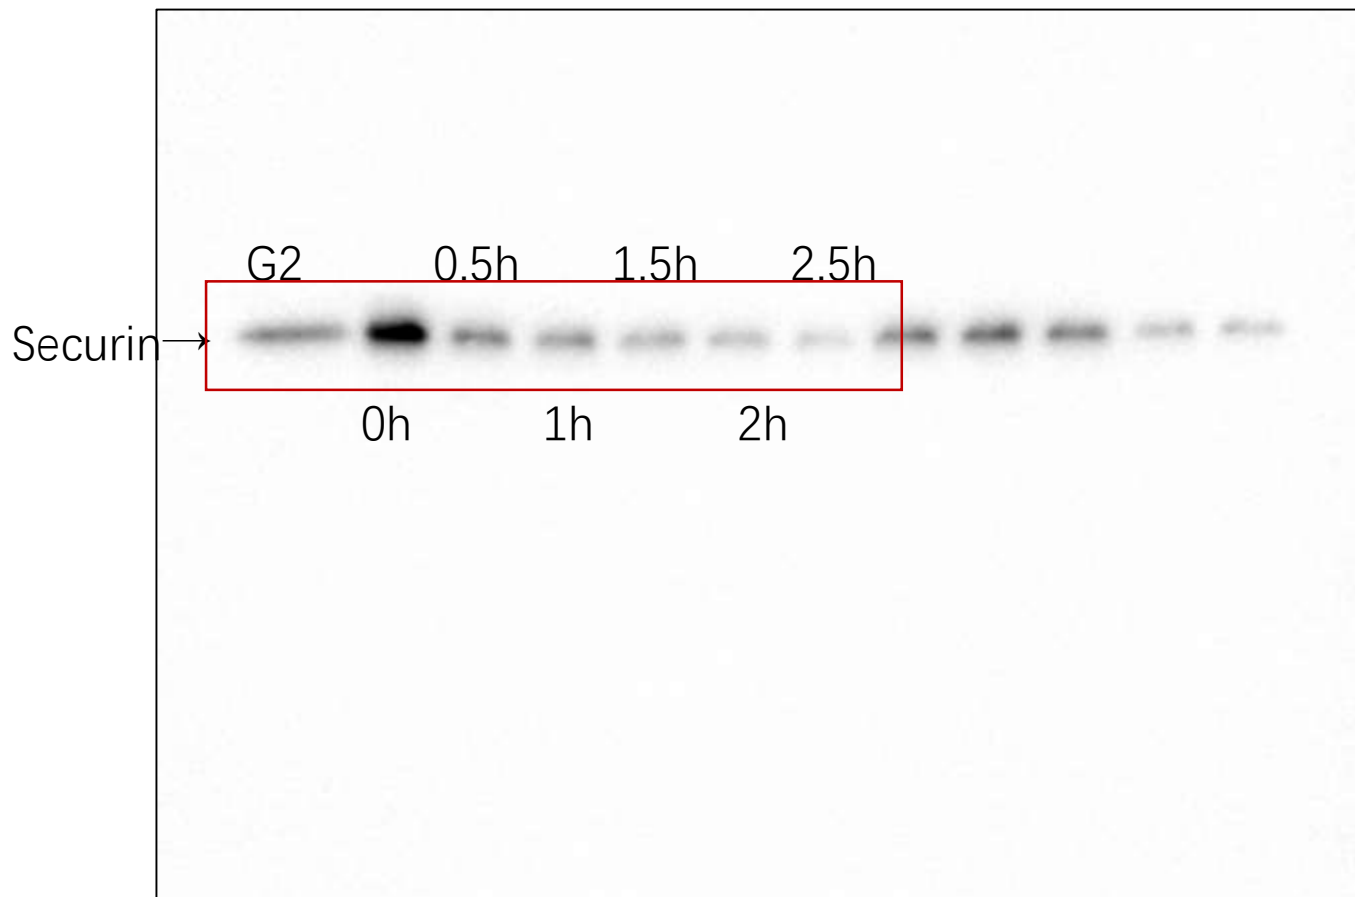

# Original images of western blots of cyclin A2 and cyclin B1 in figure 3a

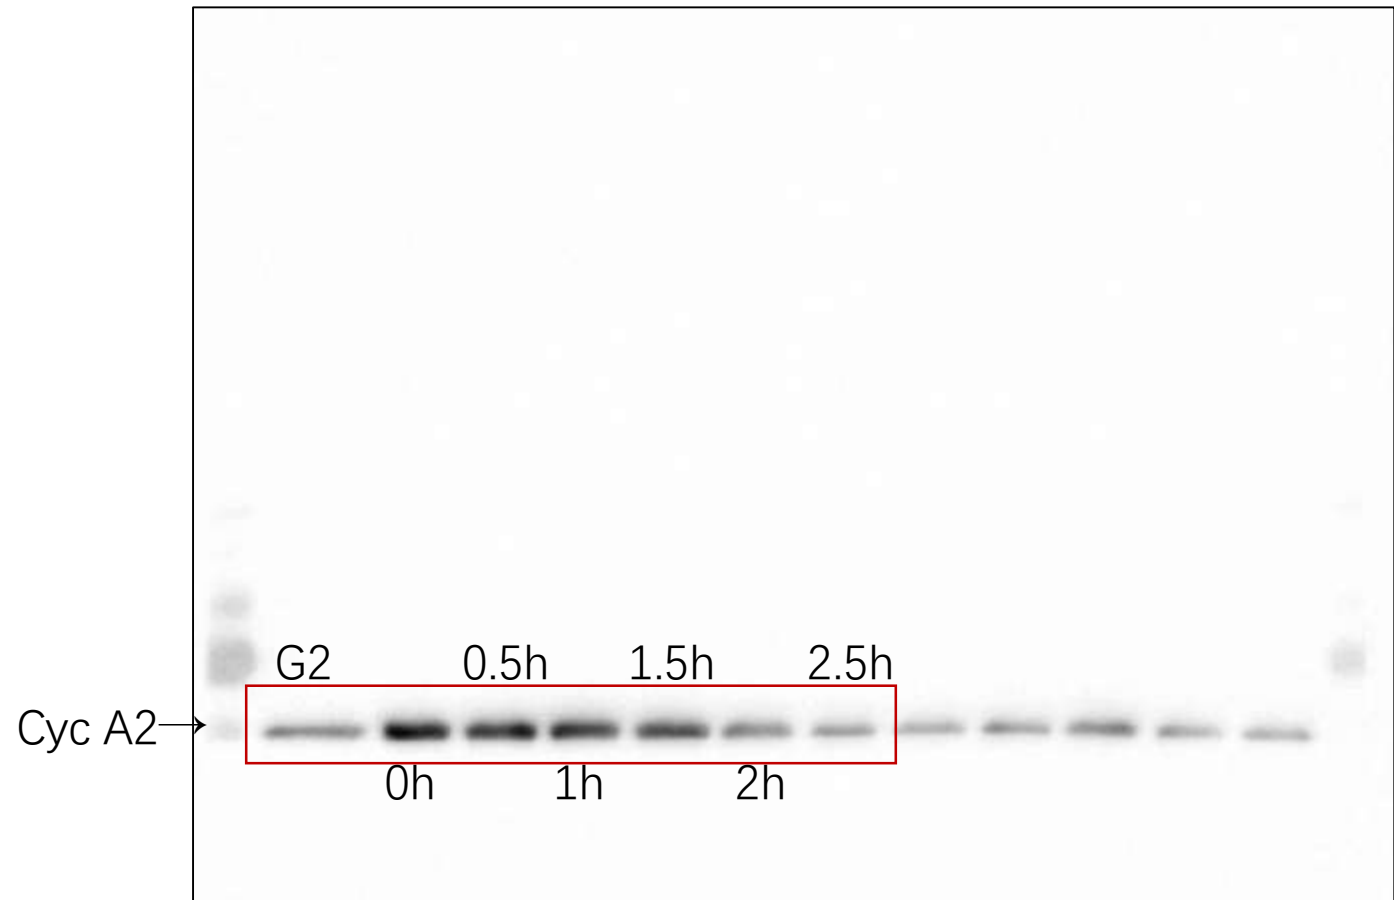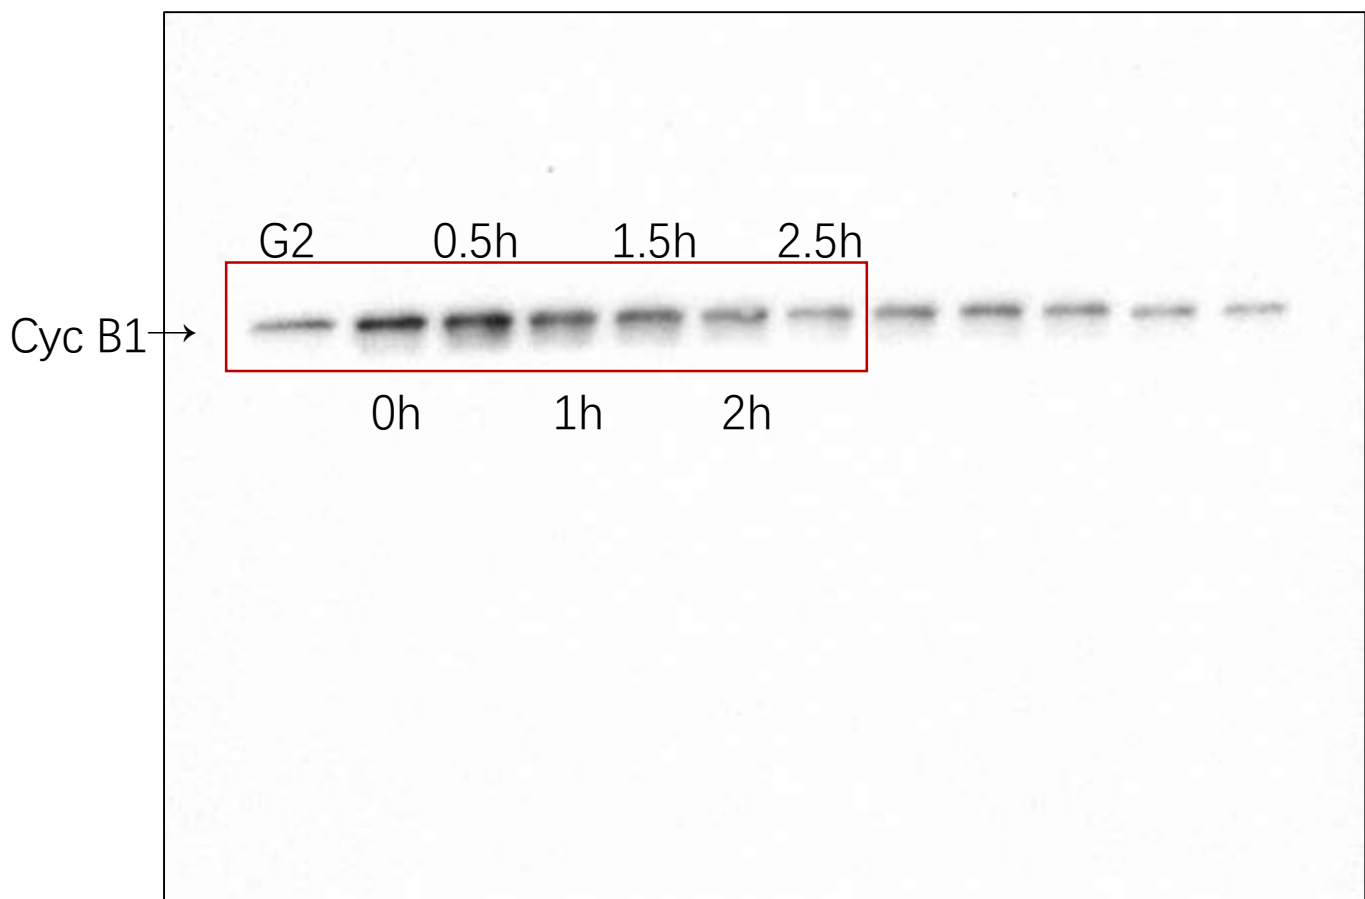

# Original images of western blots of p $H3@Ser10$ and actin in figure 3a

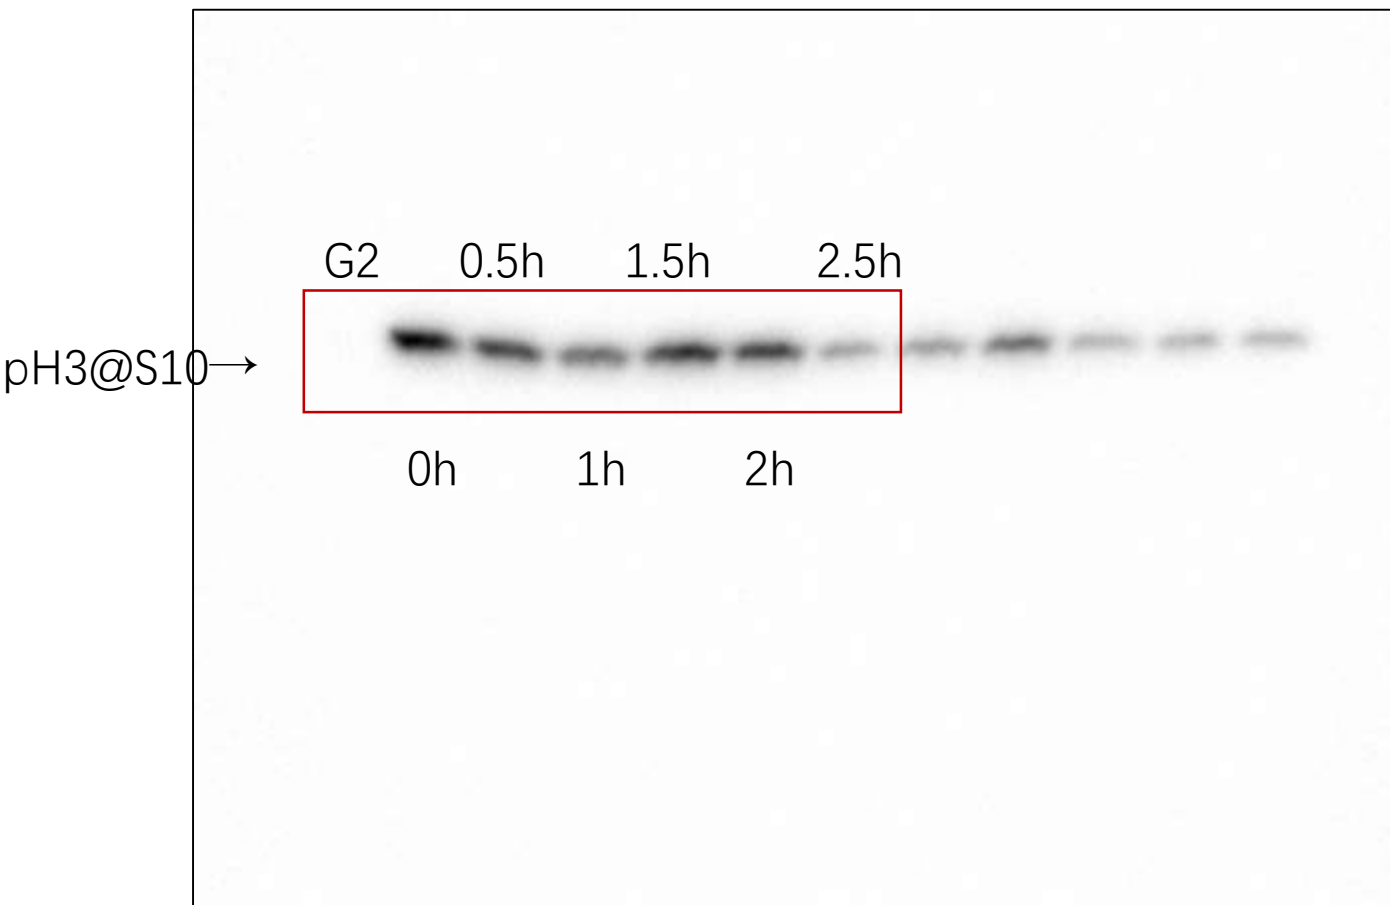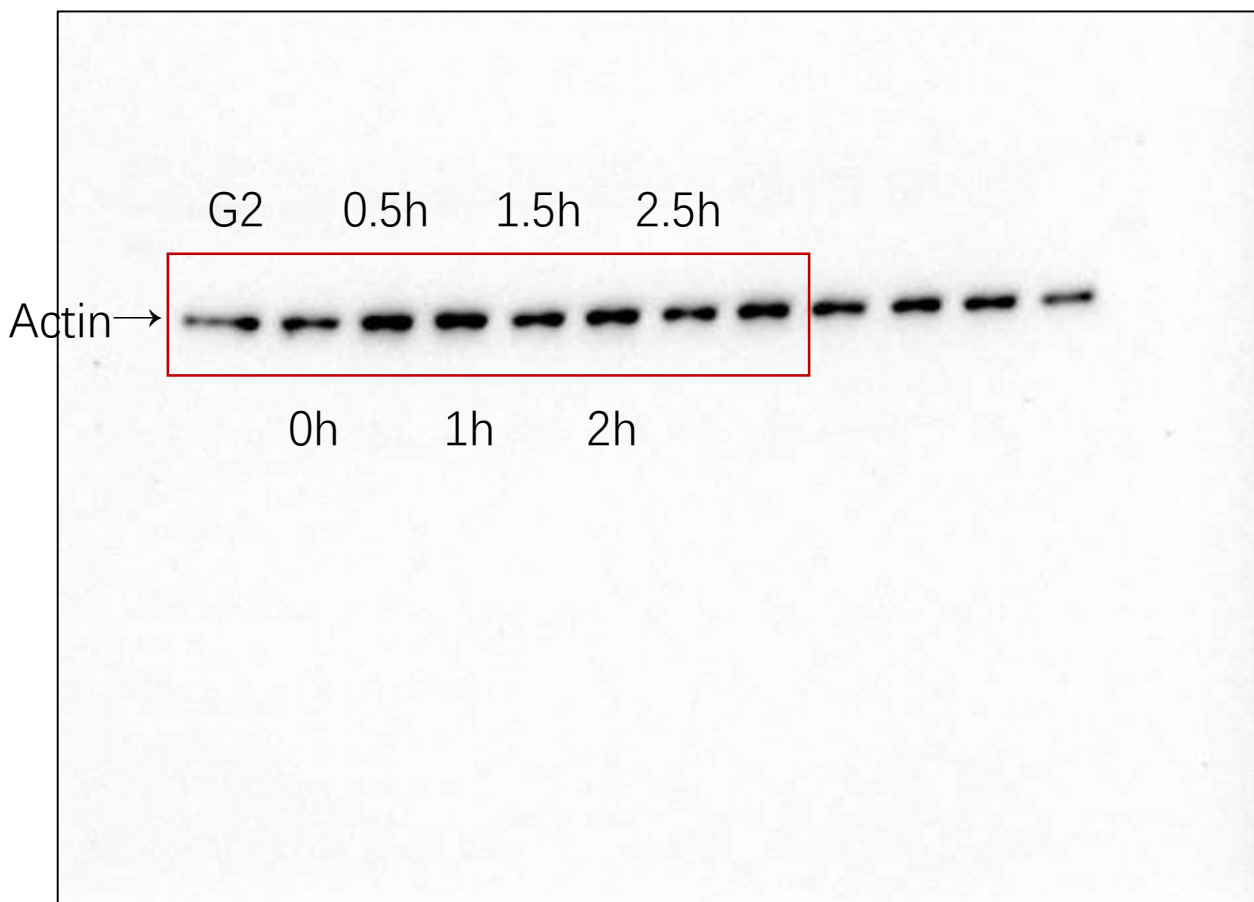

# Original images of western blots of CDH1 in figure 3a

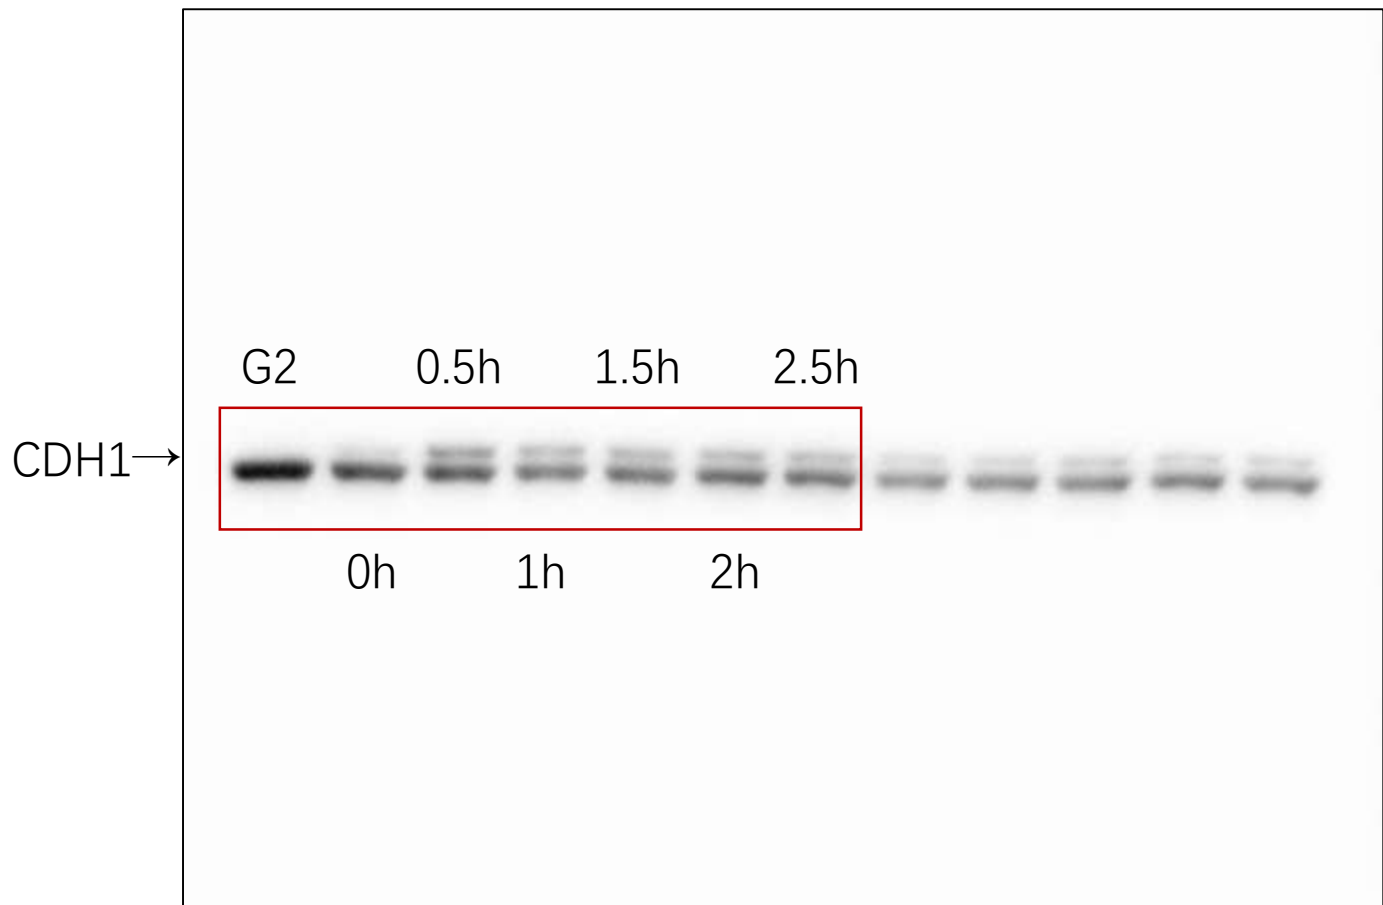

# Original images of western blots of SIRT6 and actin in figure 3b 293T

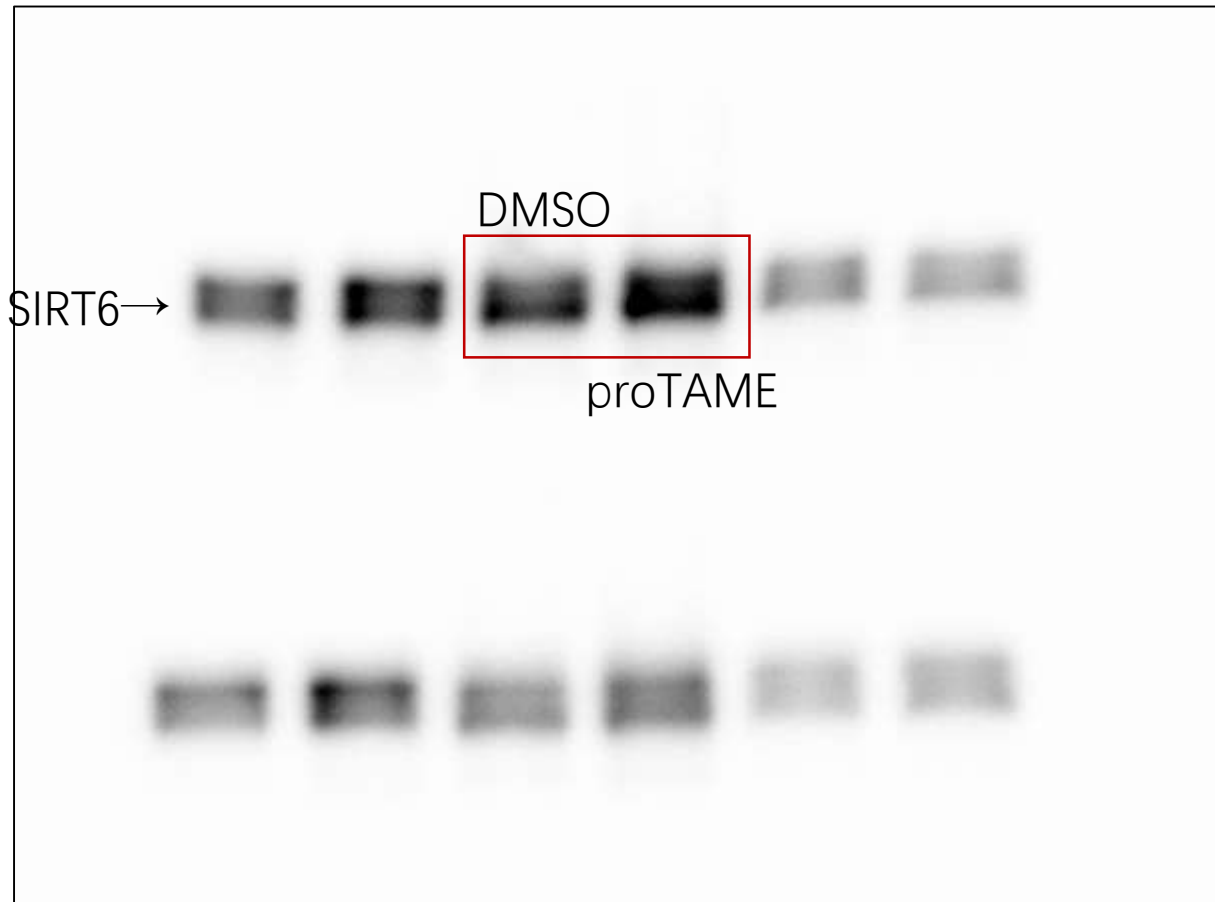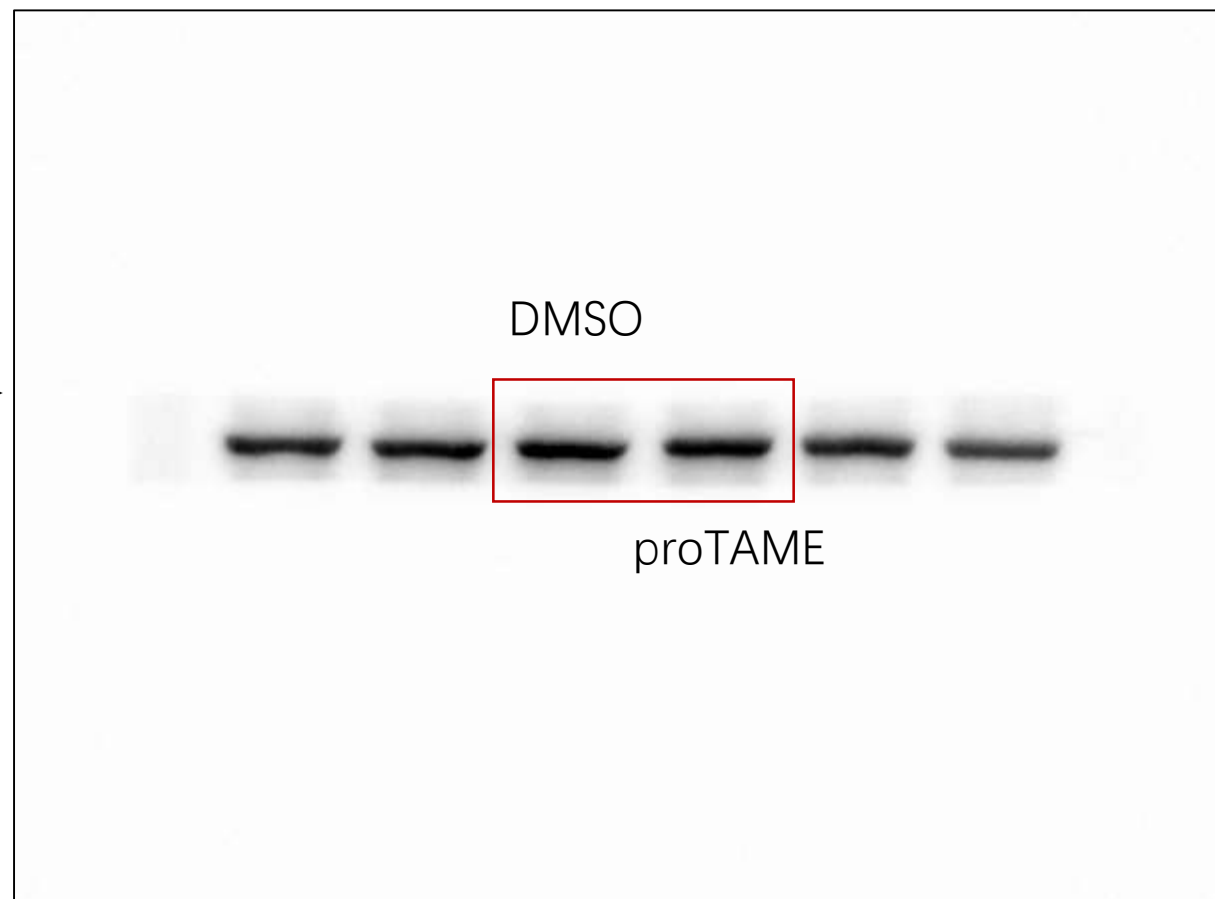

# Original images of western blots of SIRT6 and actin in figure 3b HeLa

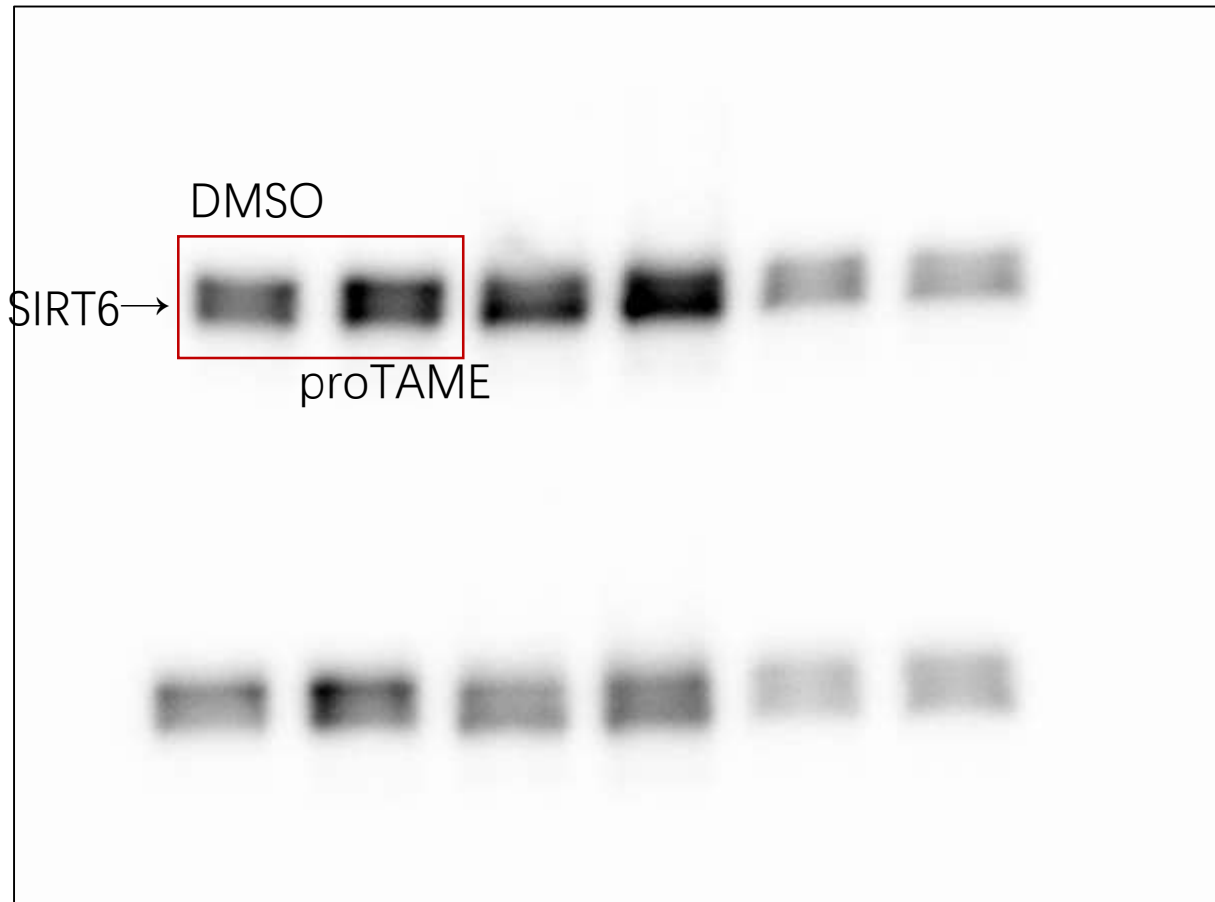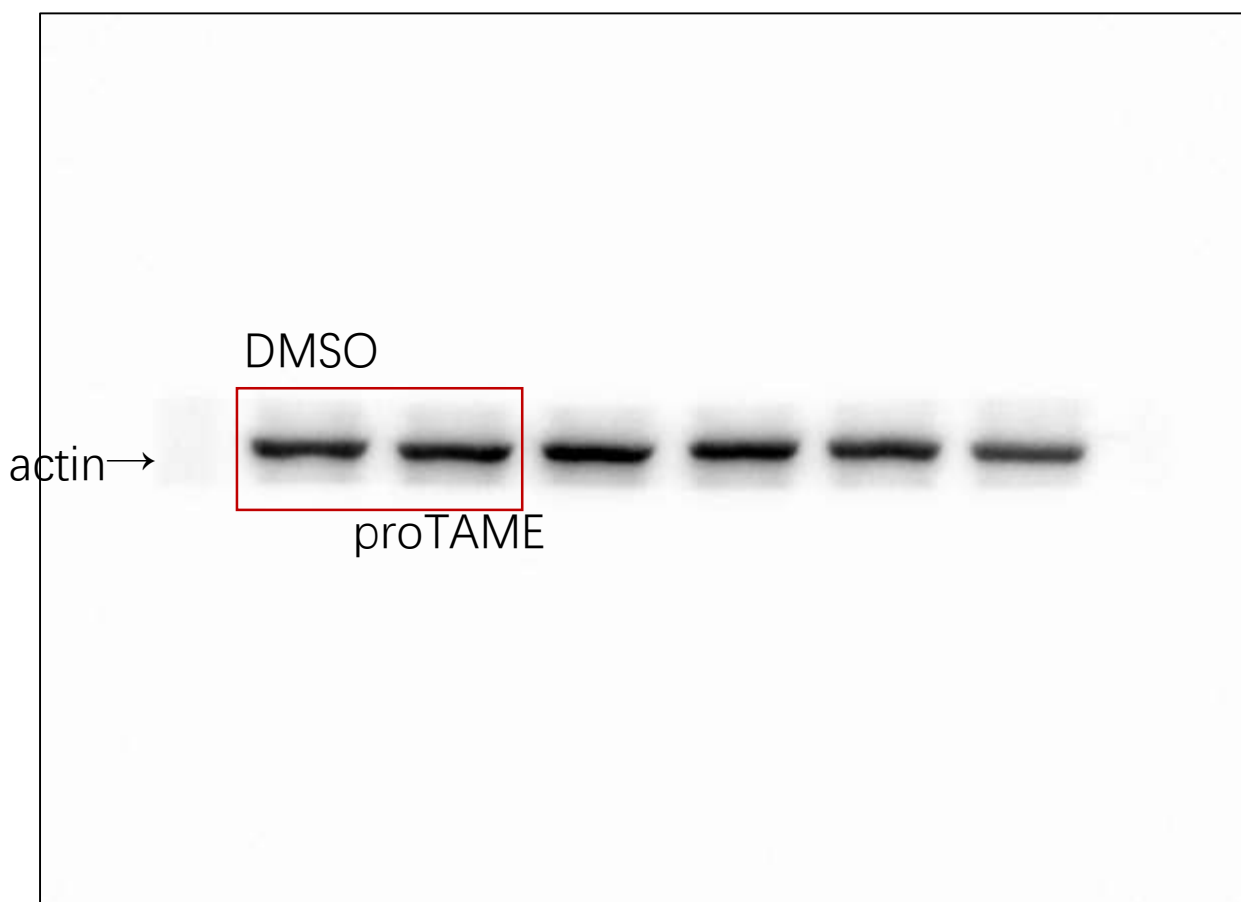



# Original images of western blots of SIRT6 and APC1 in figure 3c 293T

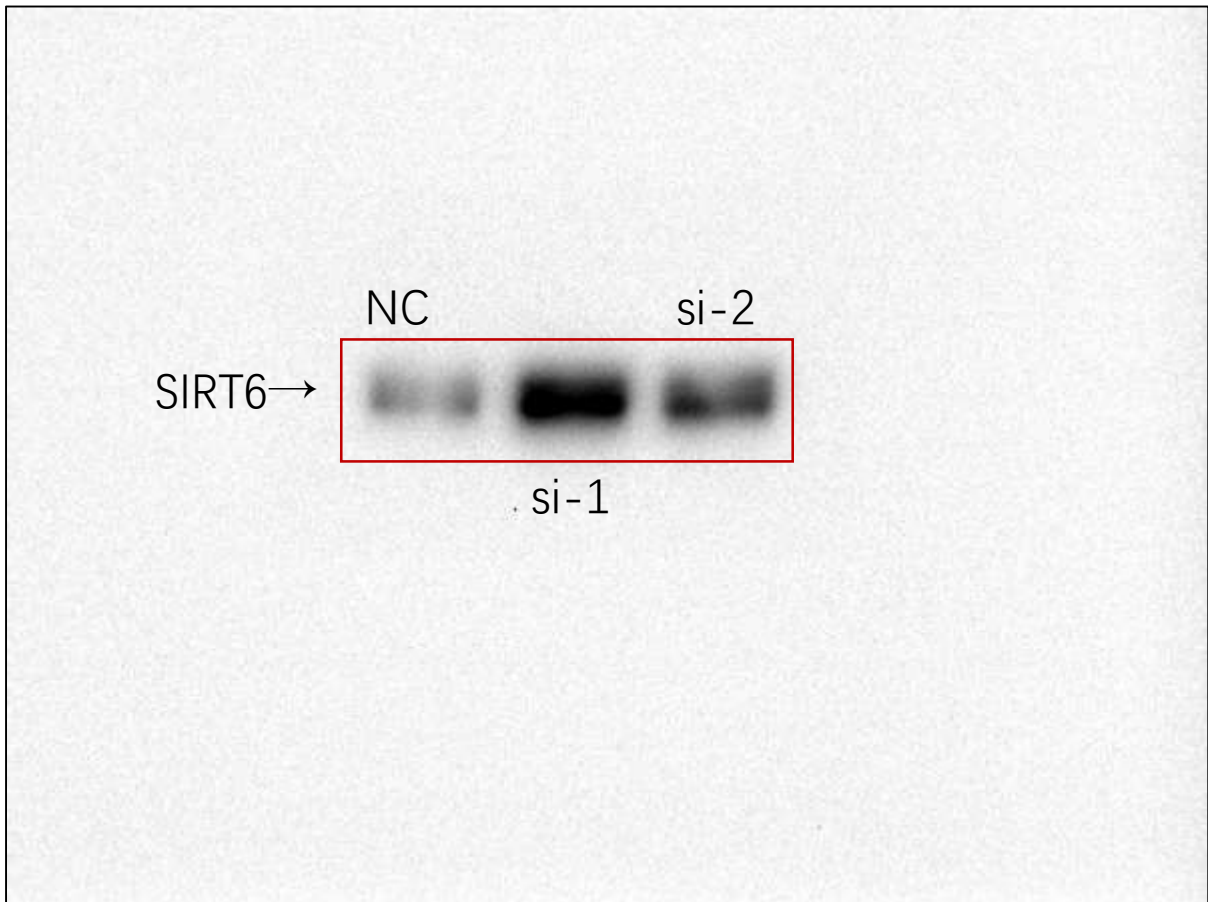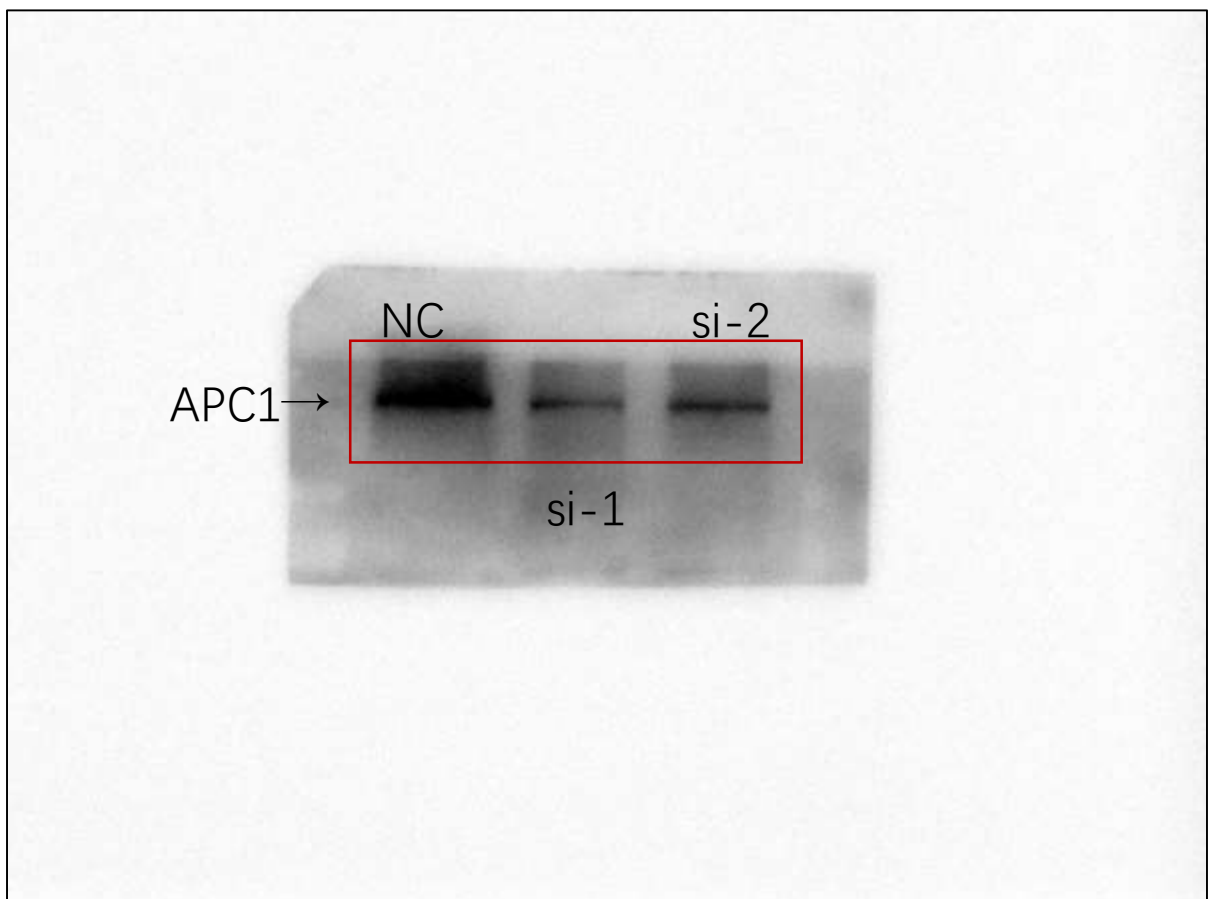

Original images of western blots of actin in figure 3c 293T

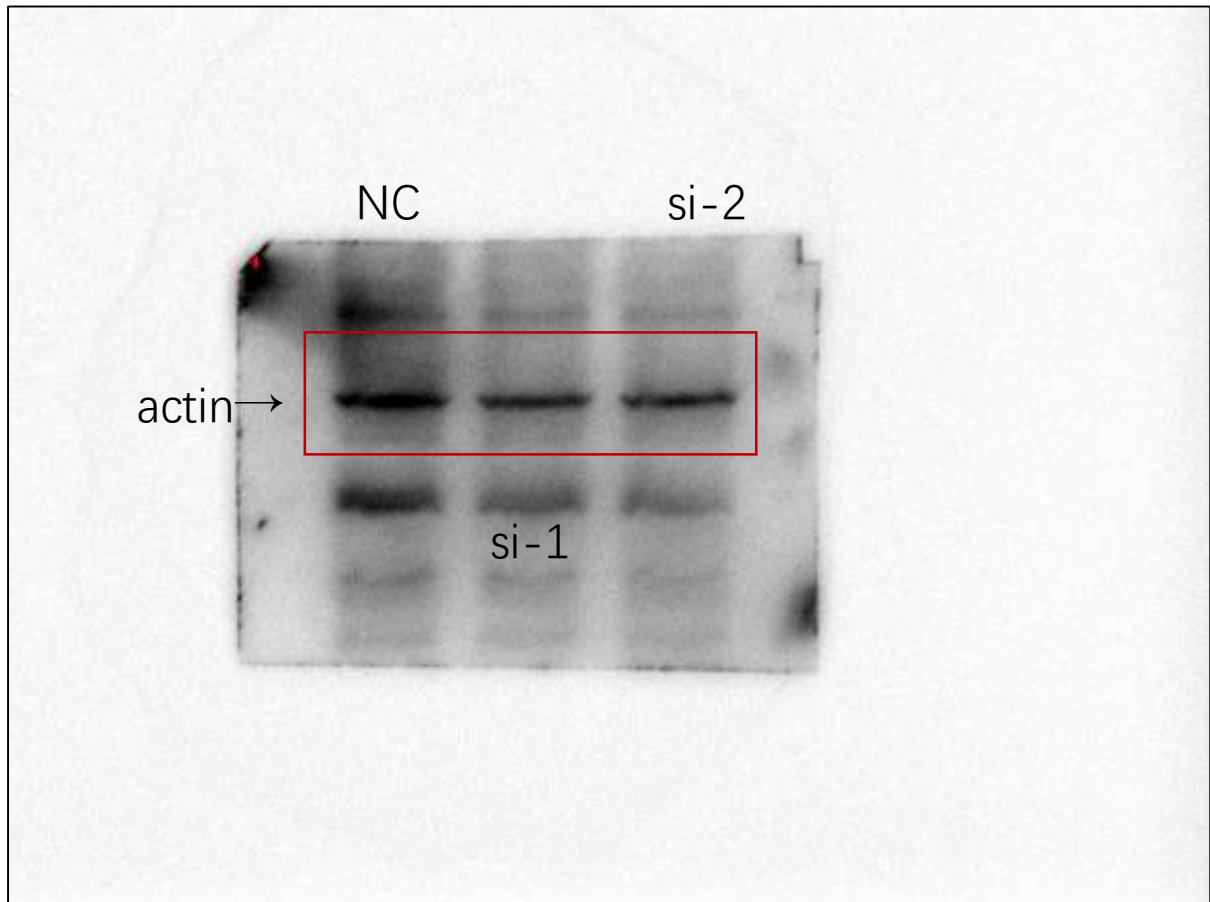

# Original images of western blots of SIRT6 and APC1 in figure 3c HeLa

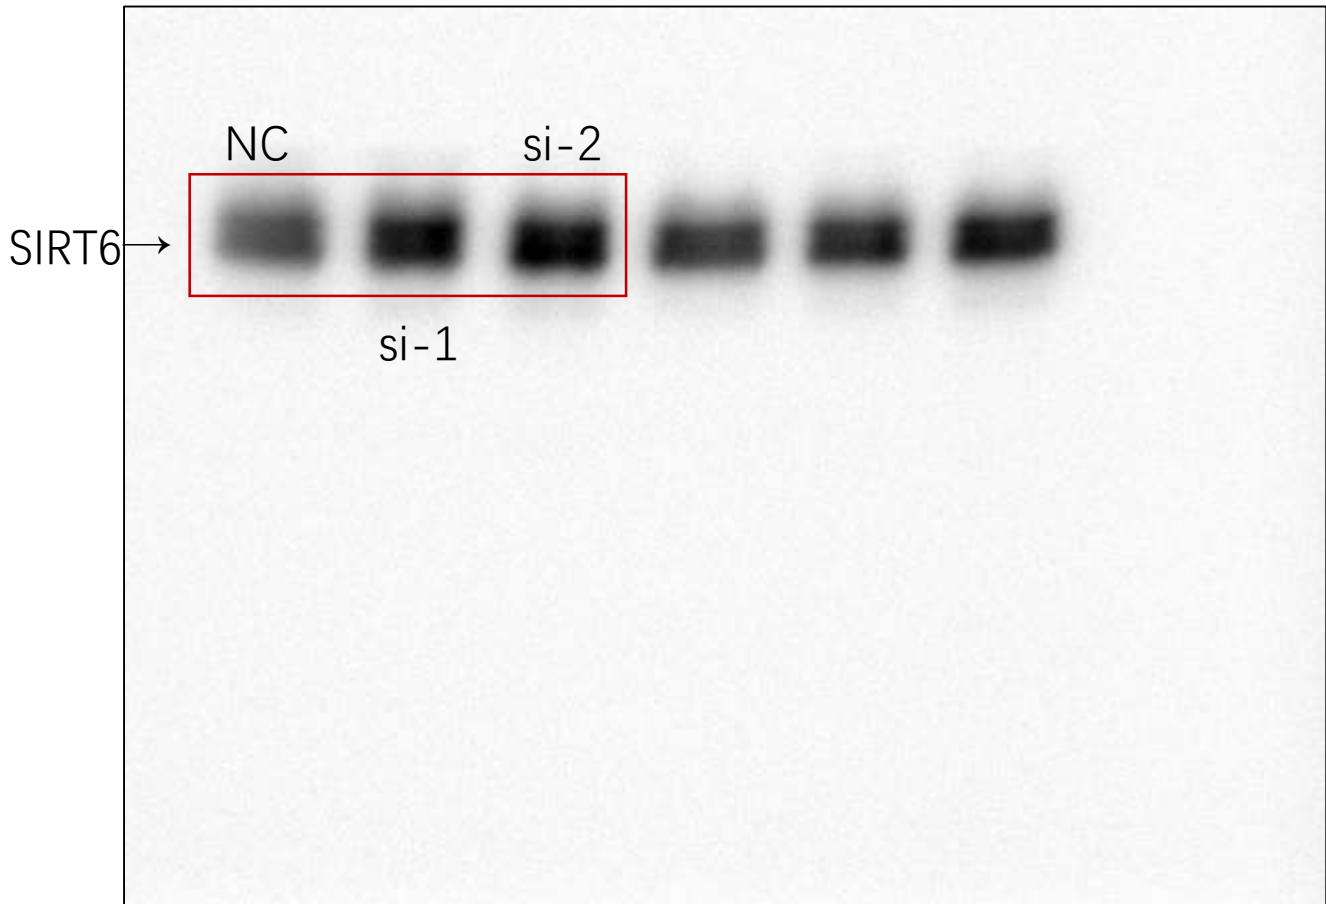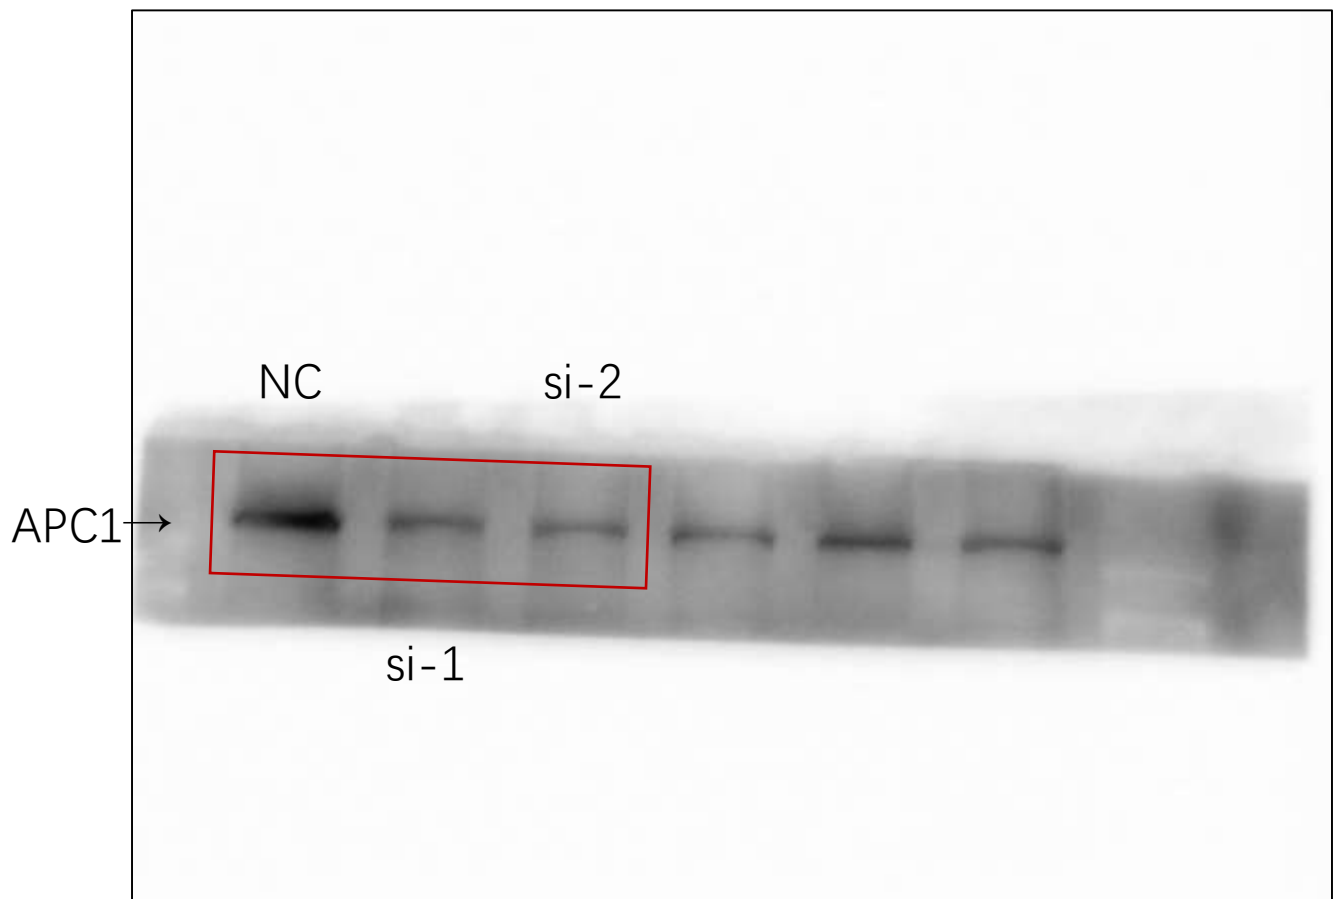

# Original images of western blots of actin in figure 3c HeLa

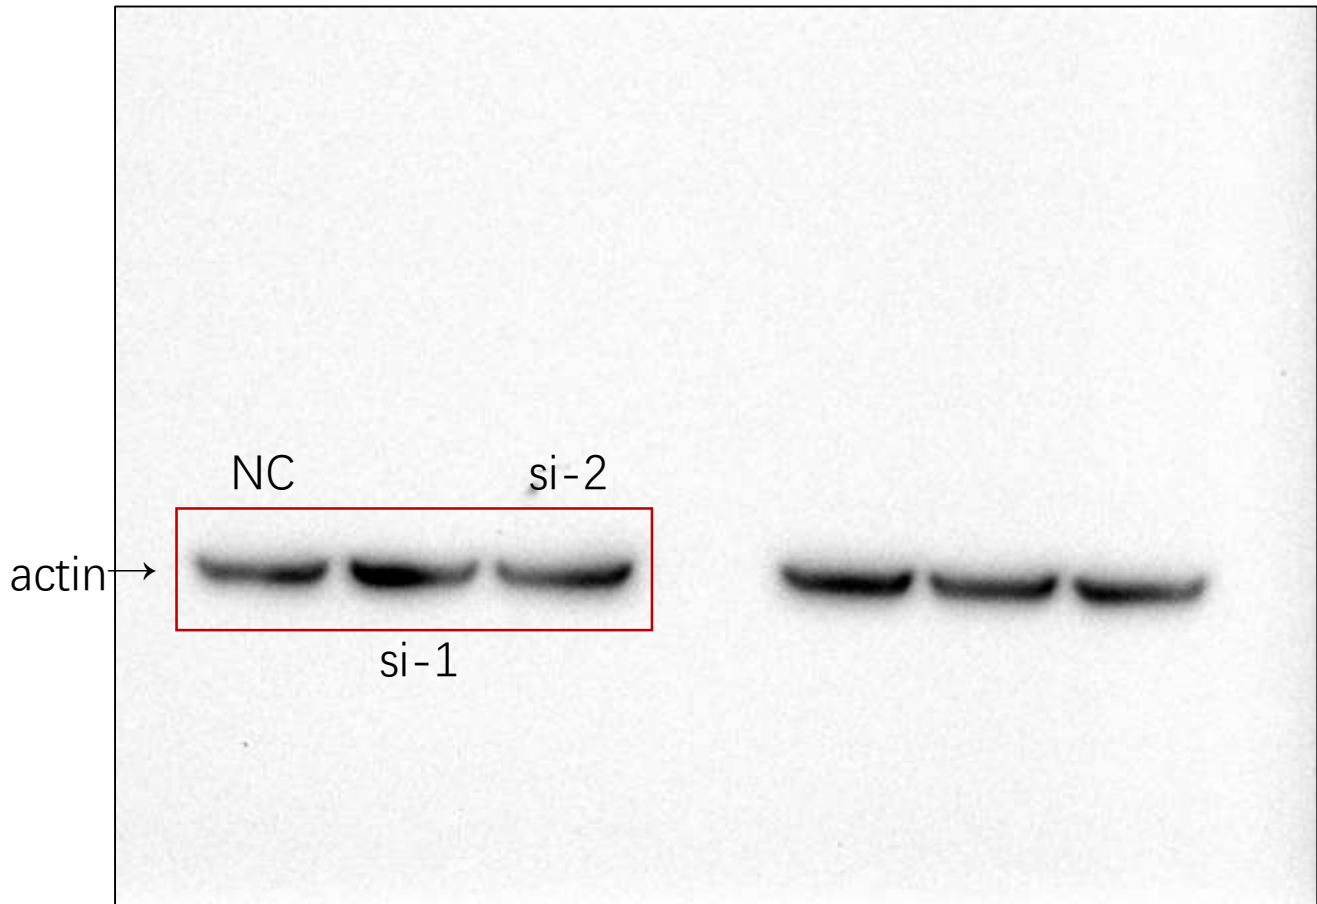

# Original images of western blots of SIRT6 and HA in figure 4a 293T

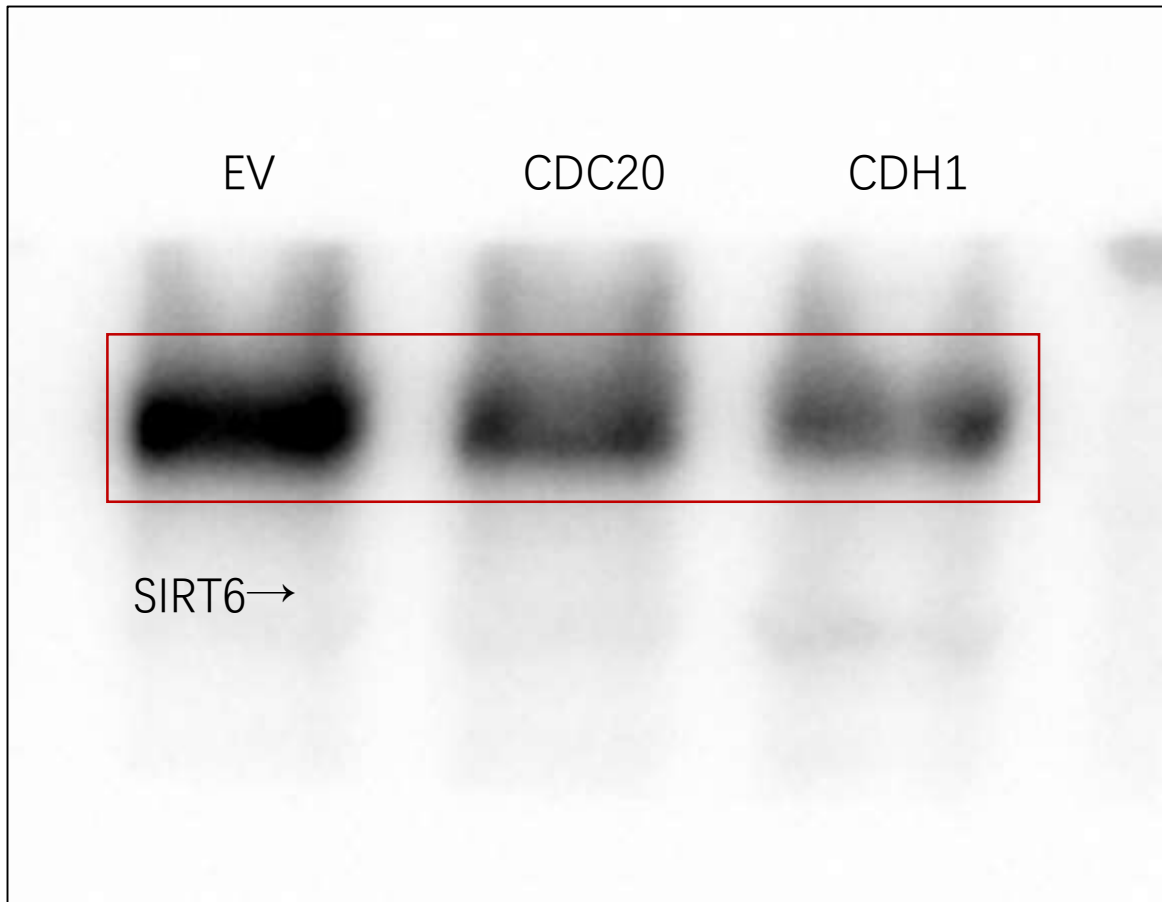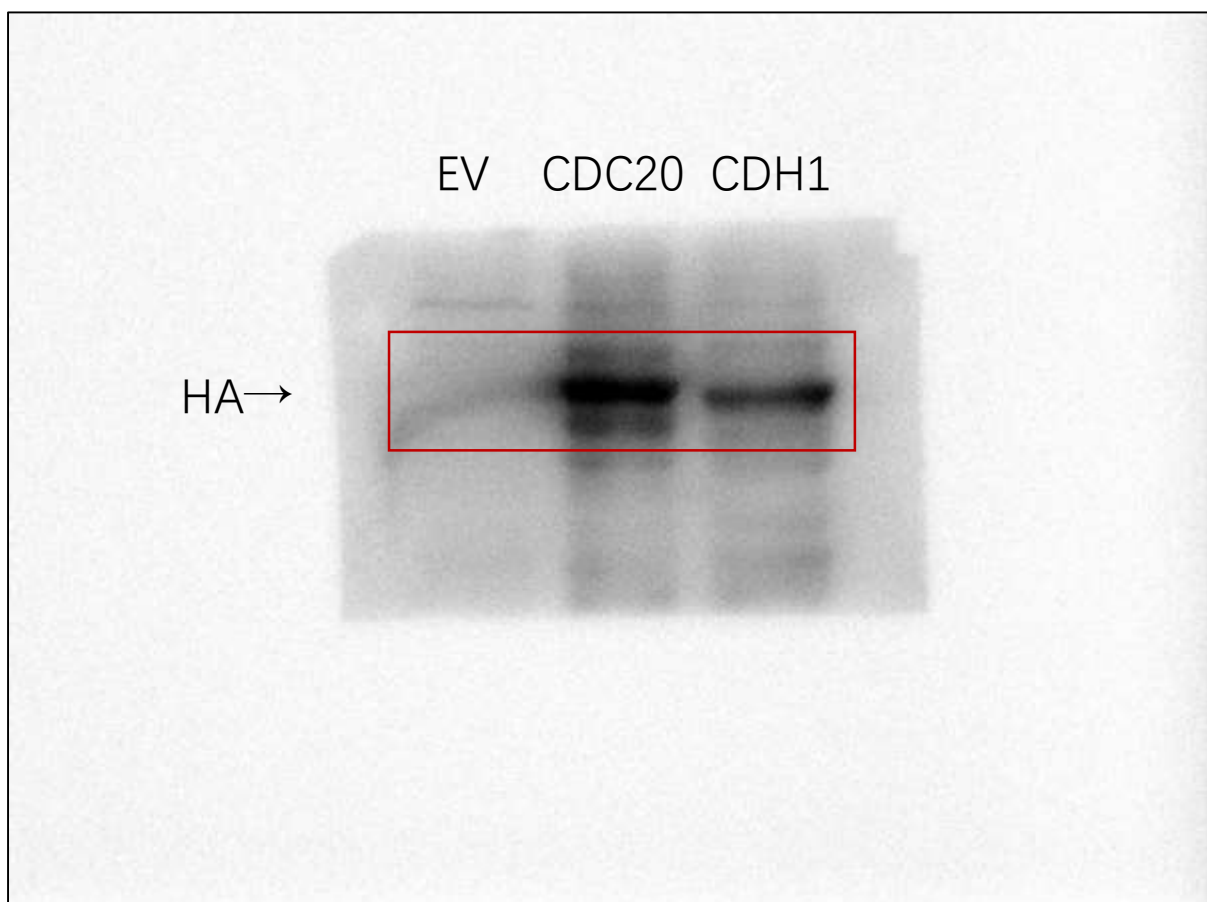

# Original images of western blots of GAPDH in figure 4a 293T

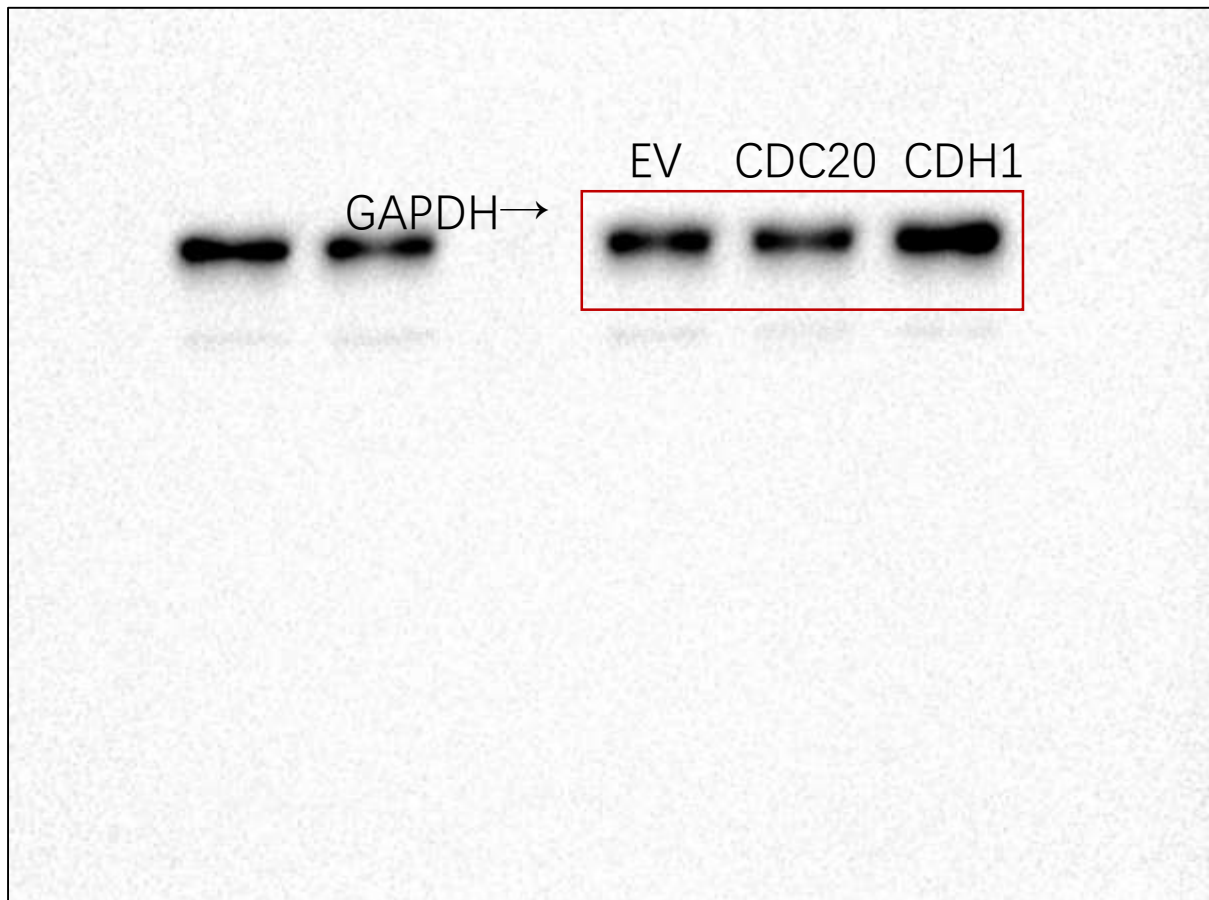

# Original images of western blots of SIRT6 and HA in figure 4a HeLa

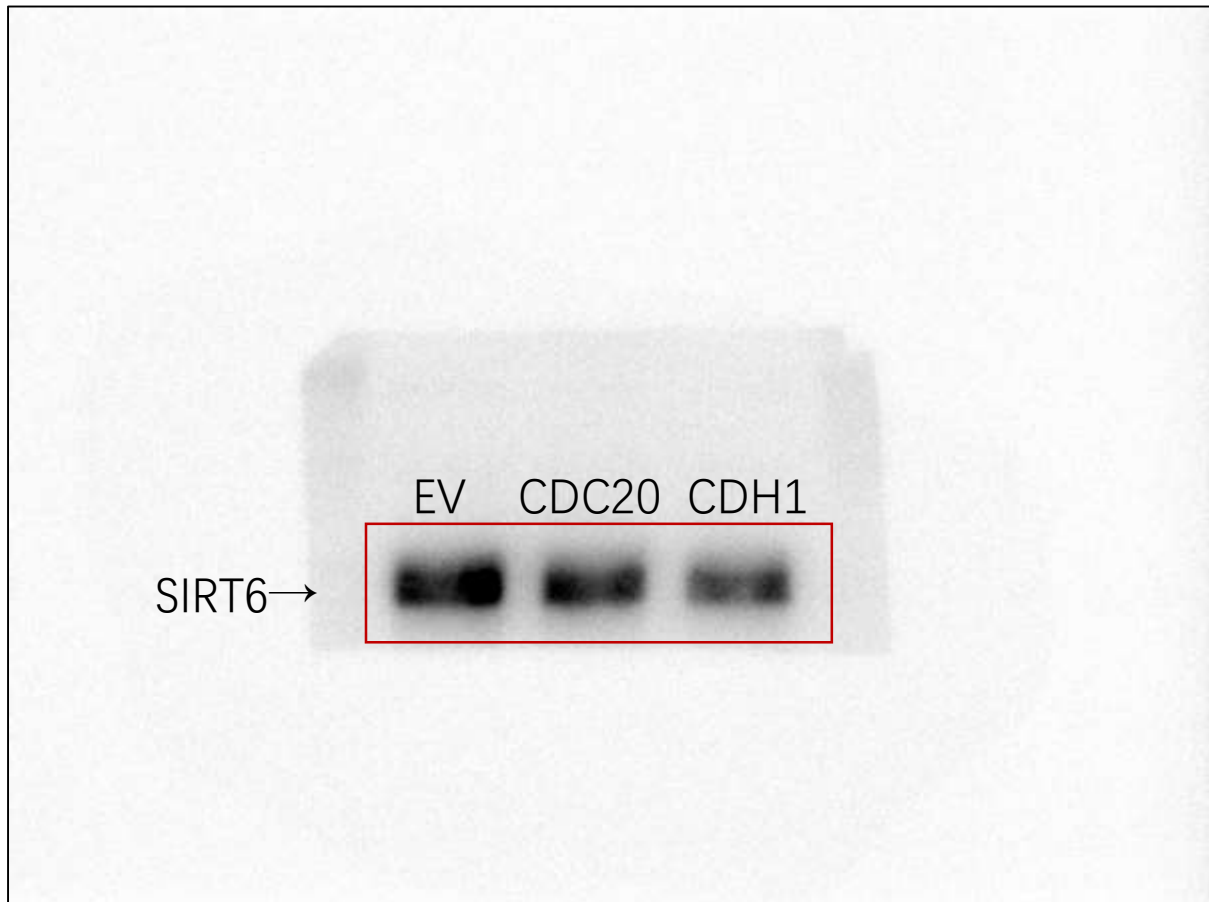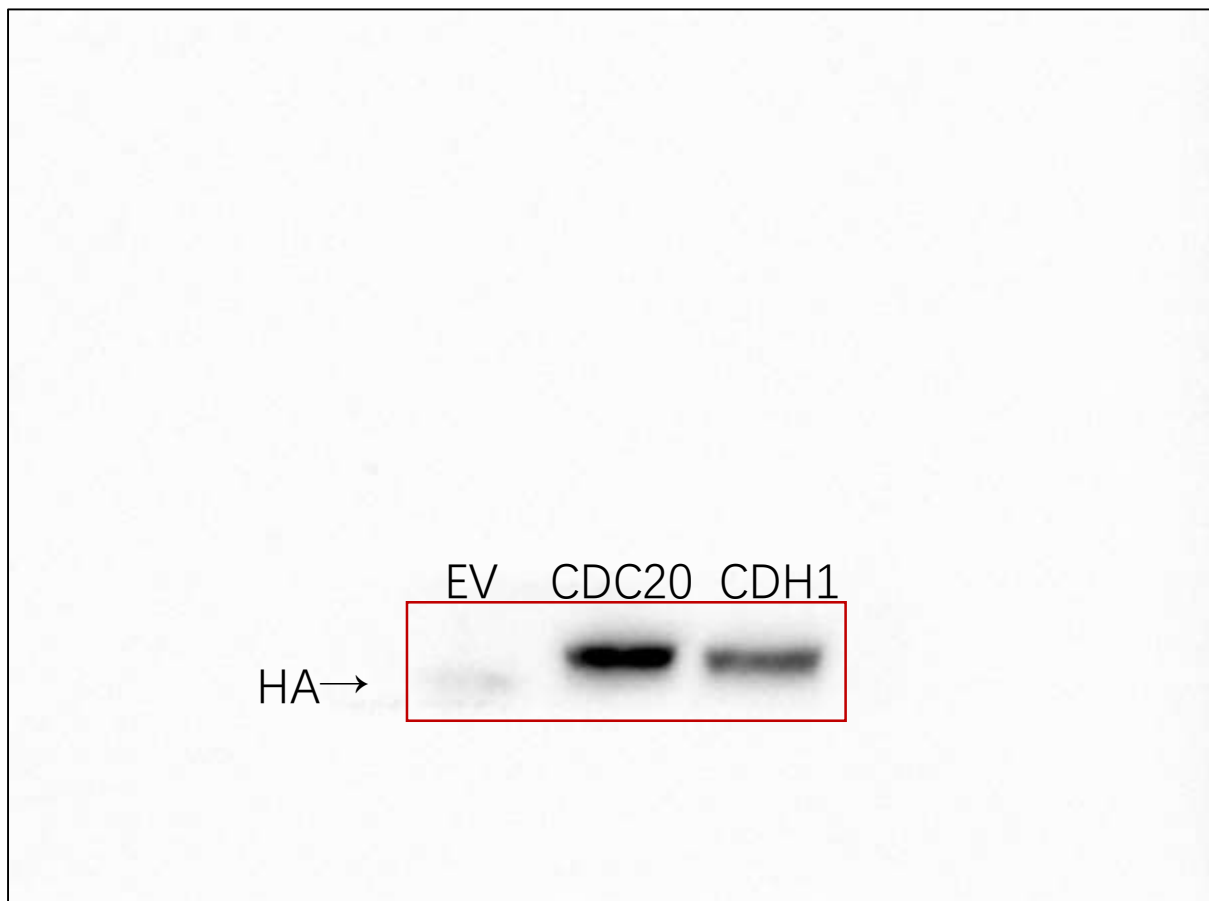

# Original images of western blots of actin in figure 4a HeLa

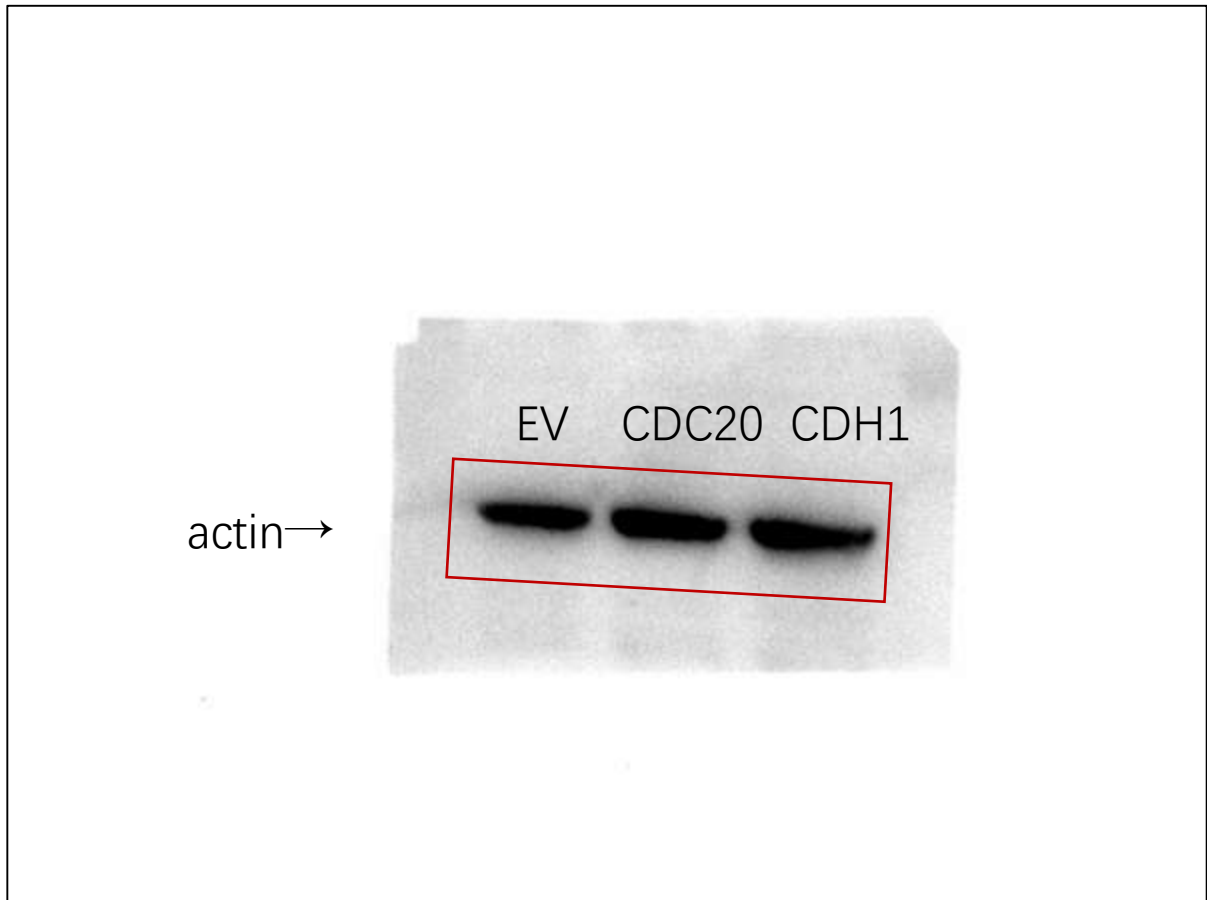



# Original images of western blots of SIRT6 in figure 4b 293T EV & CDC20

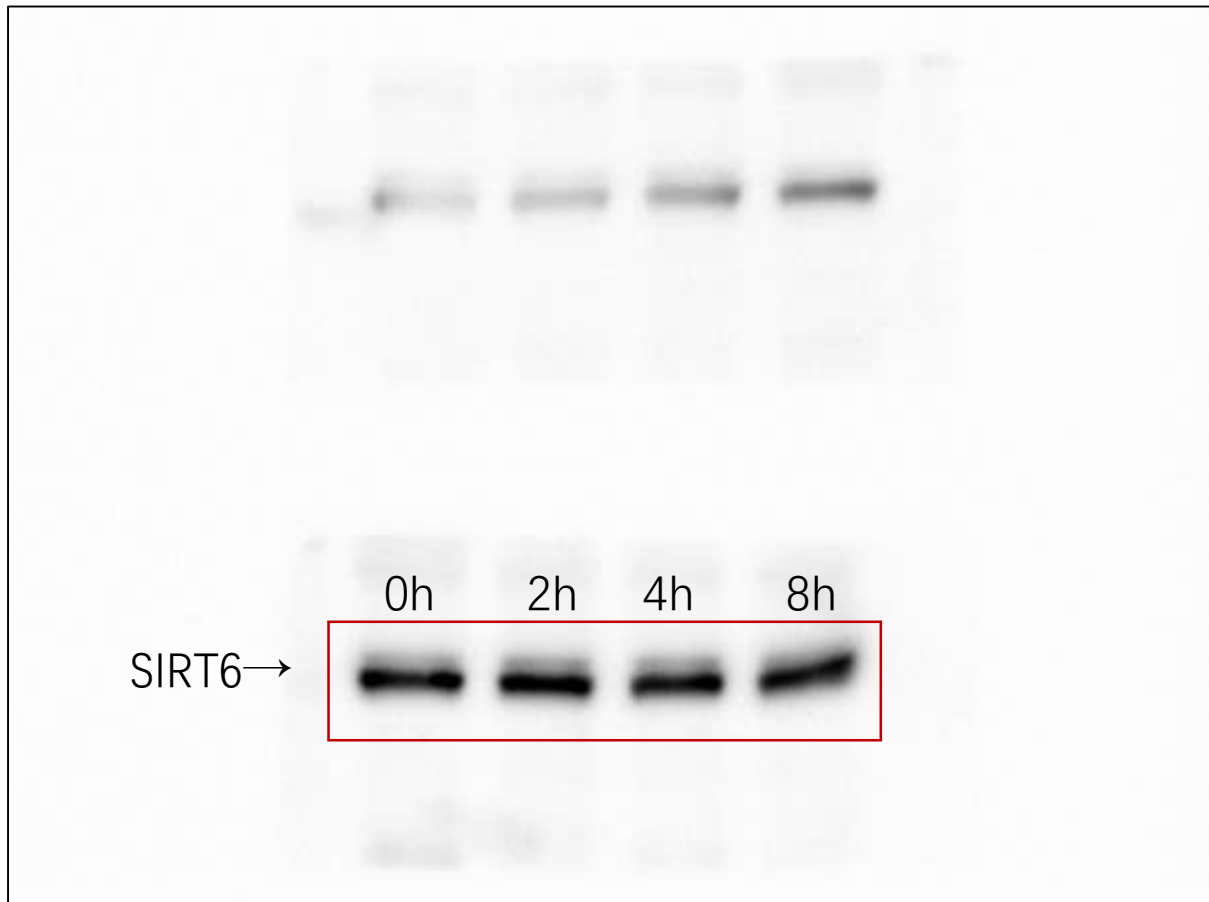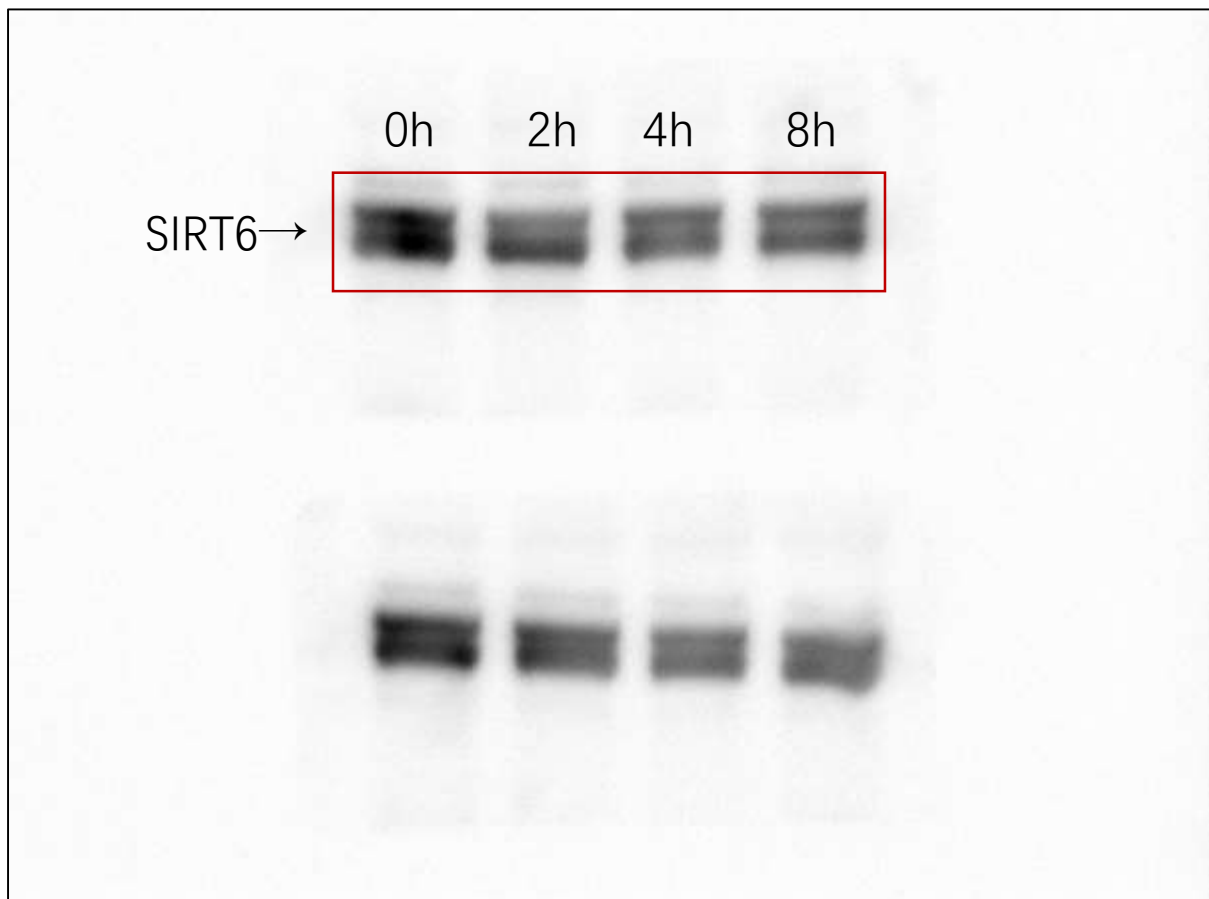

# Original images of western blots of SIRT6 in figure 4b 293T CDH1

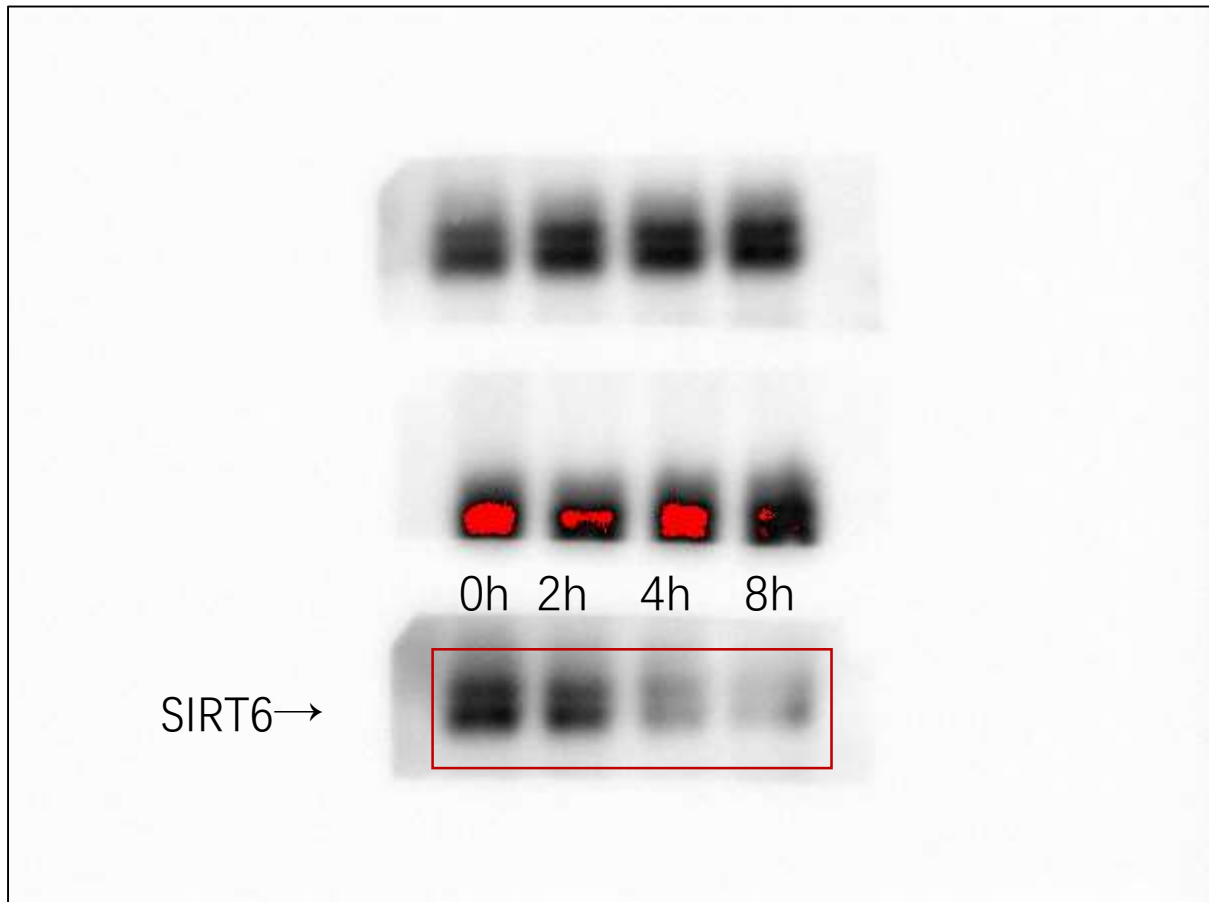

# Original images of western blots of actin in figure 4b 293T EV & CDC20

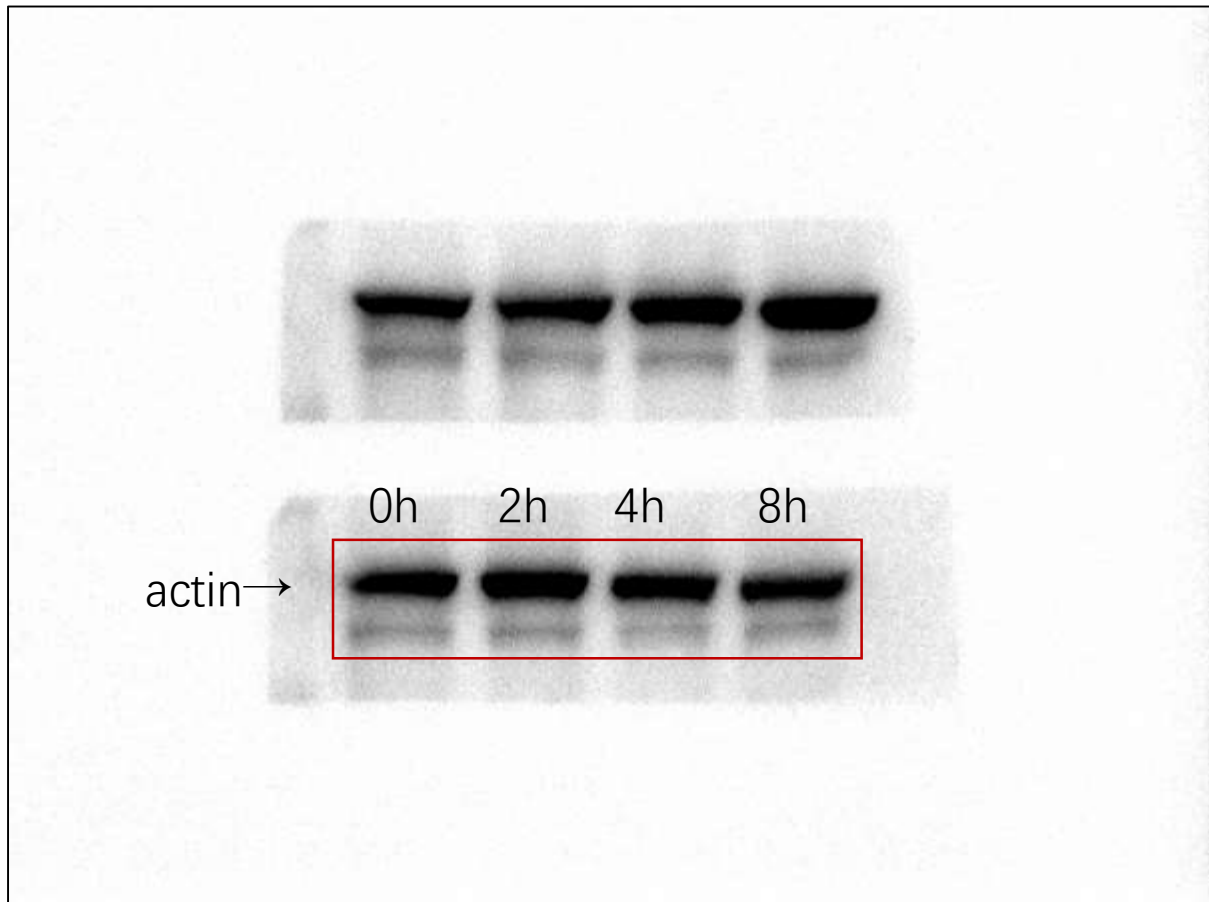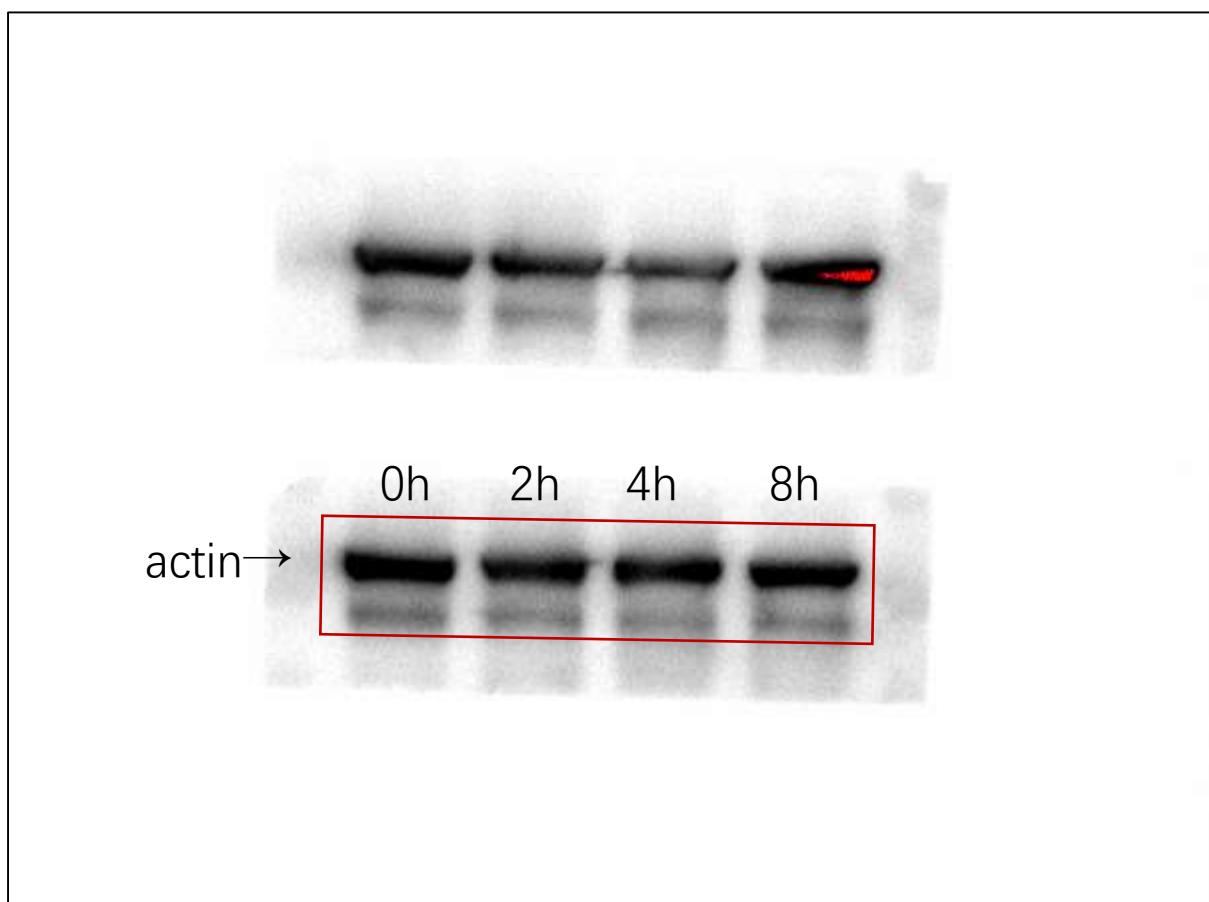

# Original images of western blots of actin in figure 4b 293T CDH1

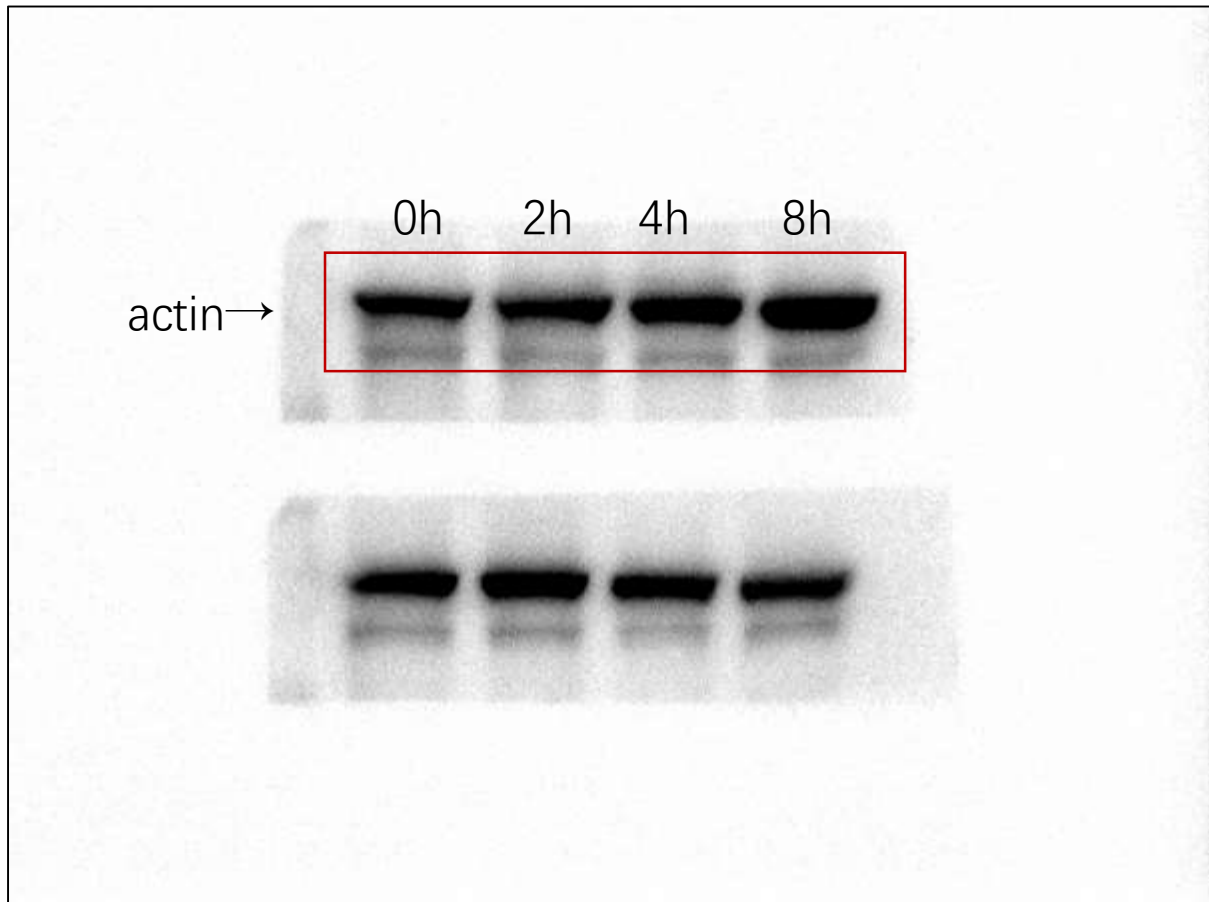

# Original images of western blots of SIRT6 in figure 4b HeLa EV & CDC20

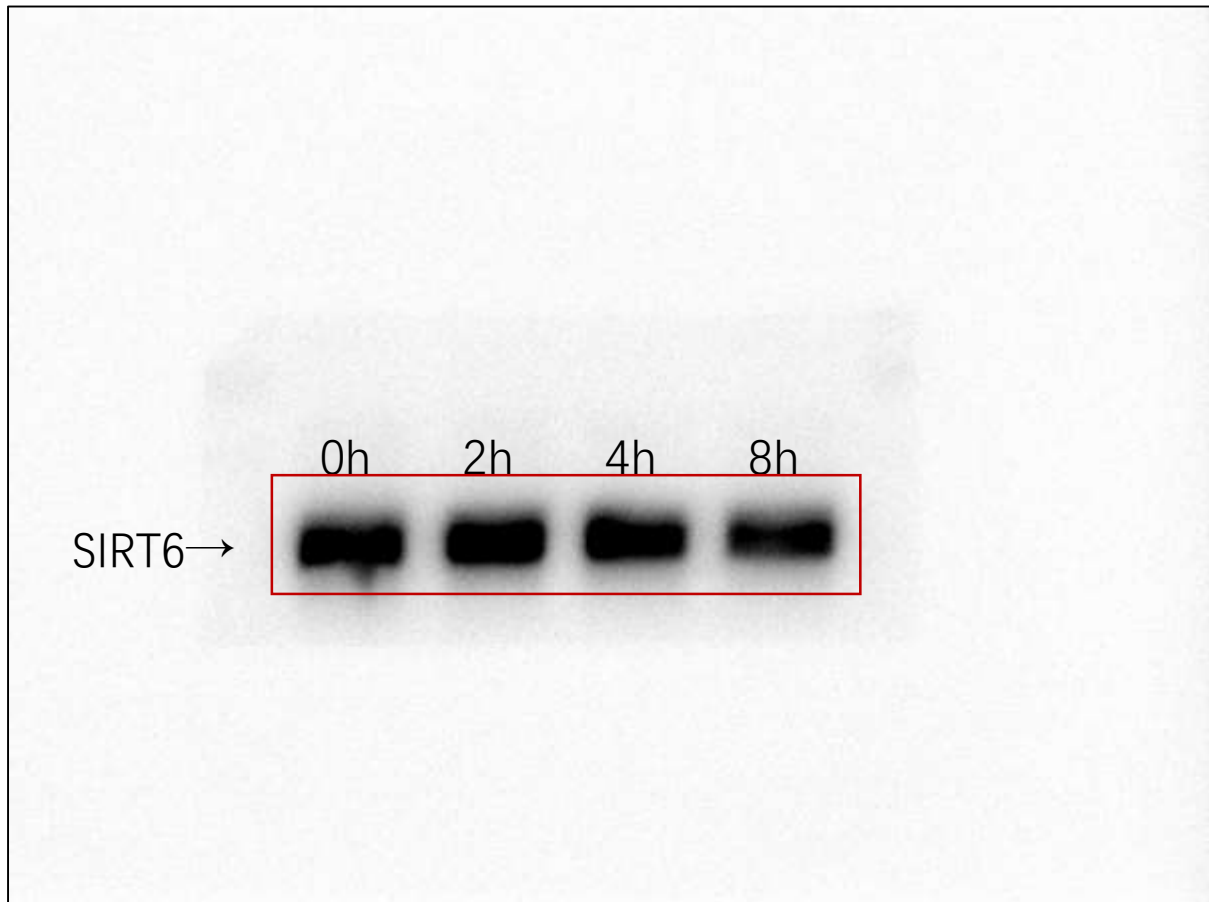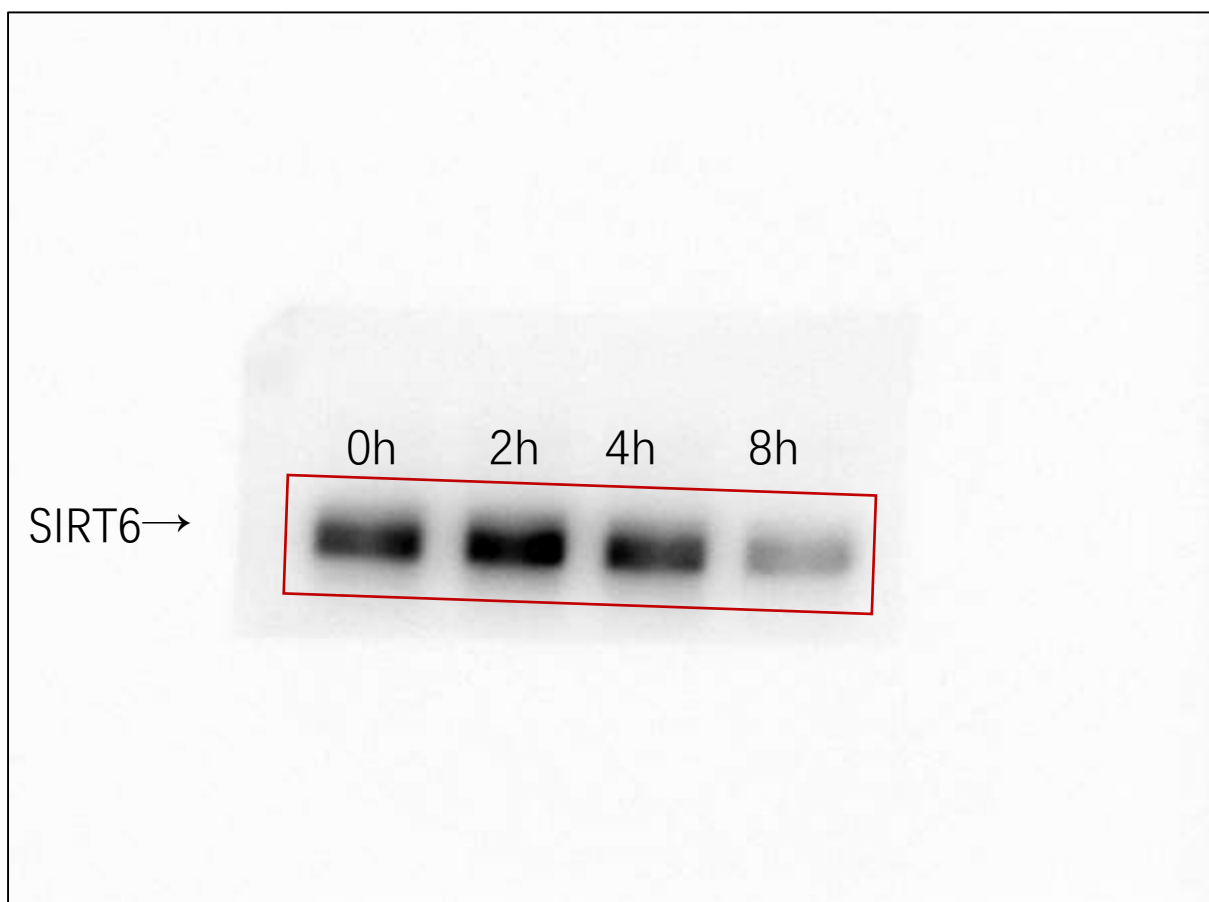

# Original images of western blots of SIRT6 in figure 4b HeLa CDH1

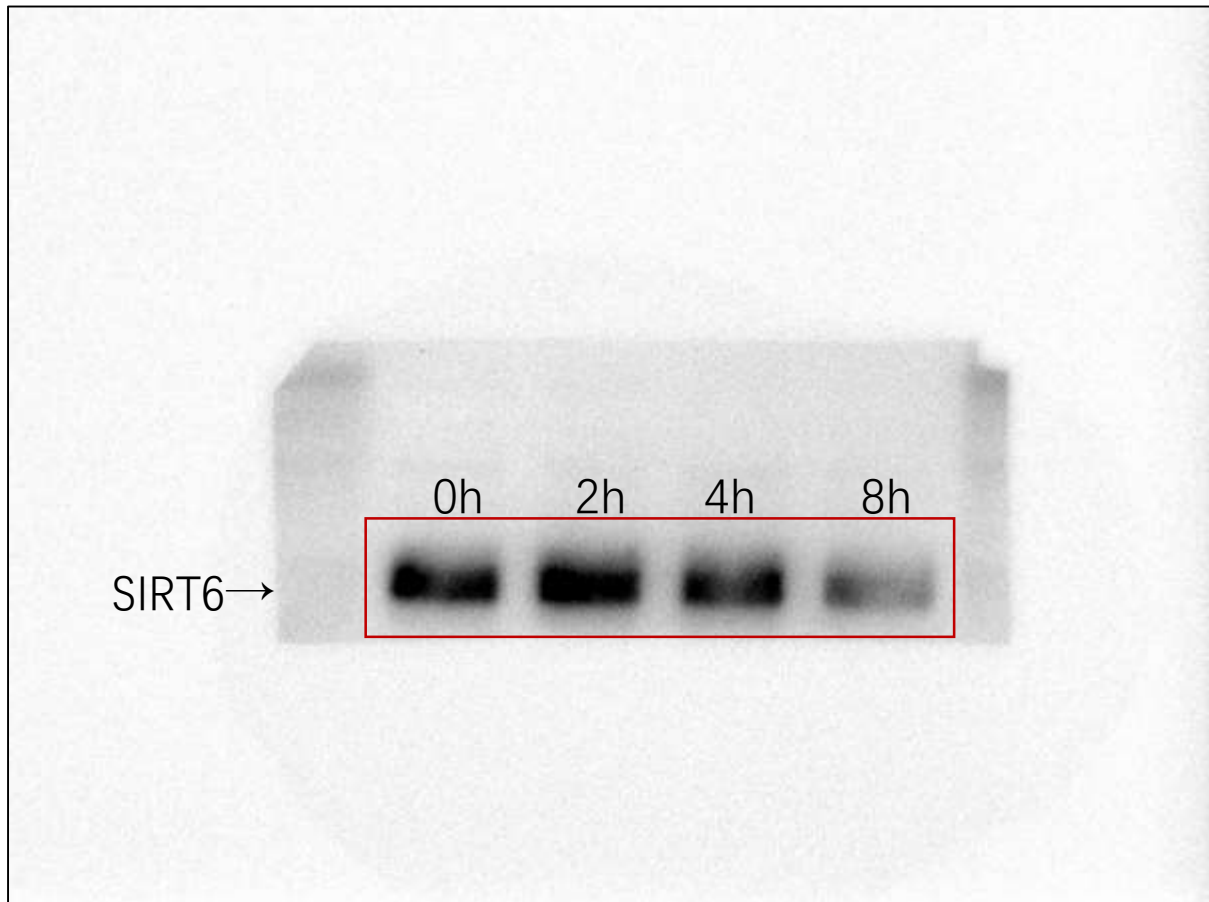

# Original images of western blots of actin in figure 4b HeLa EV & CDC20

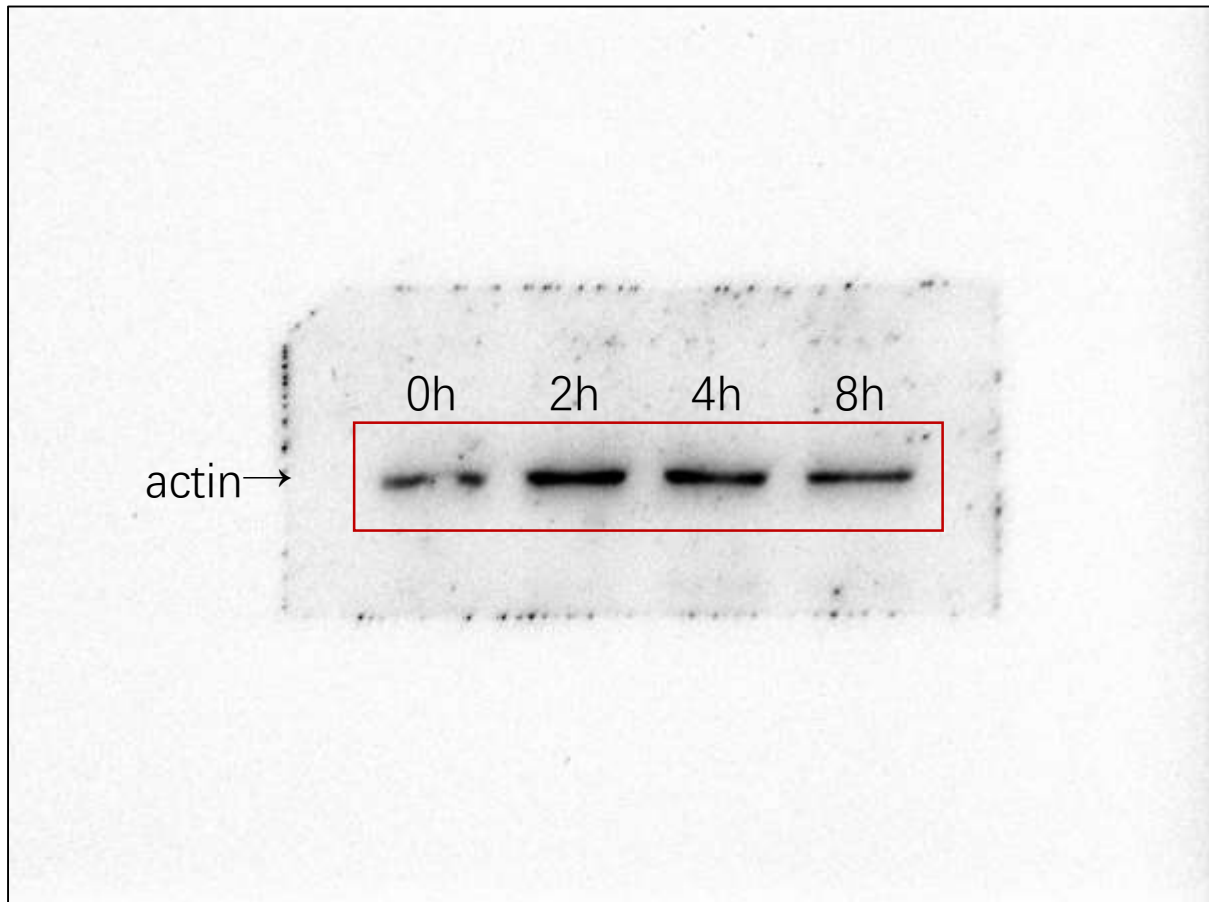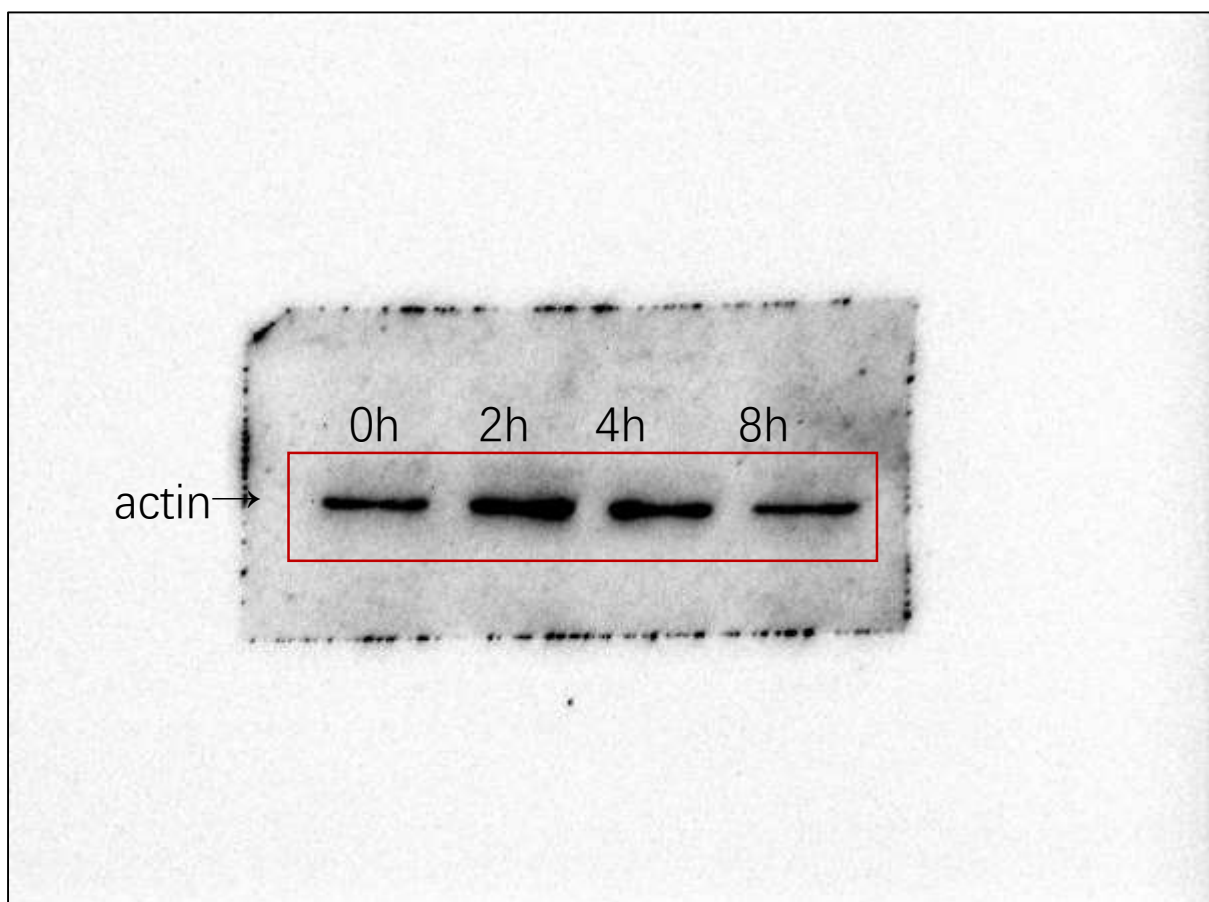

Original images of western blots of actin in figure 4b HeLa CDH1

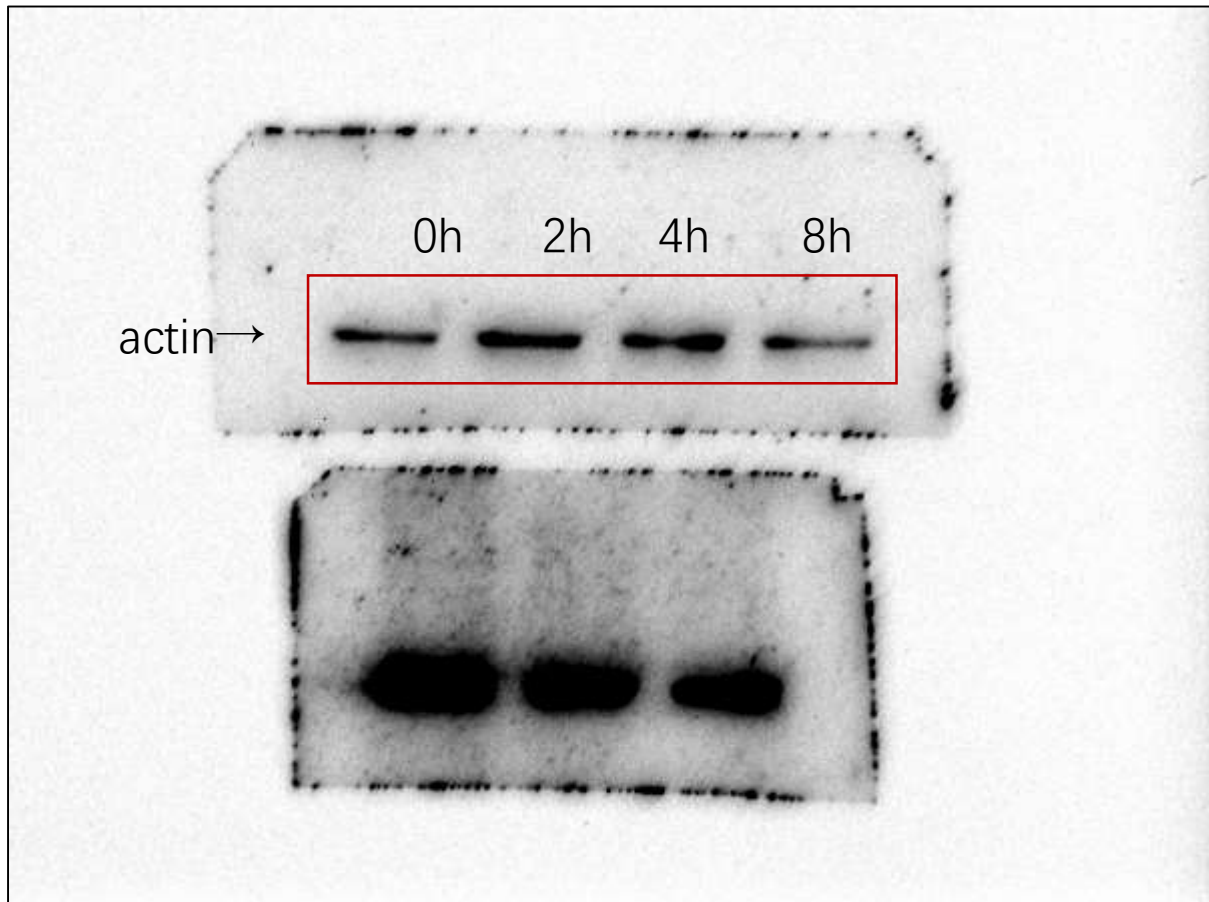



# Original images of western blots of Ub & HA in figure 4c

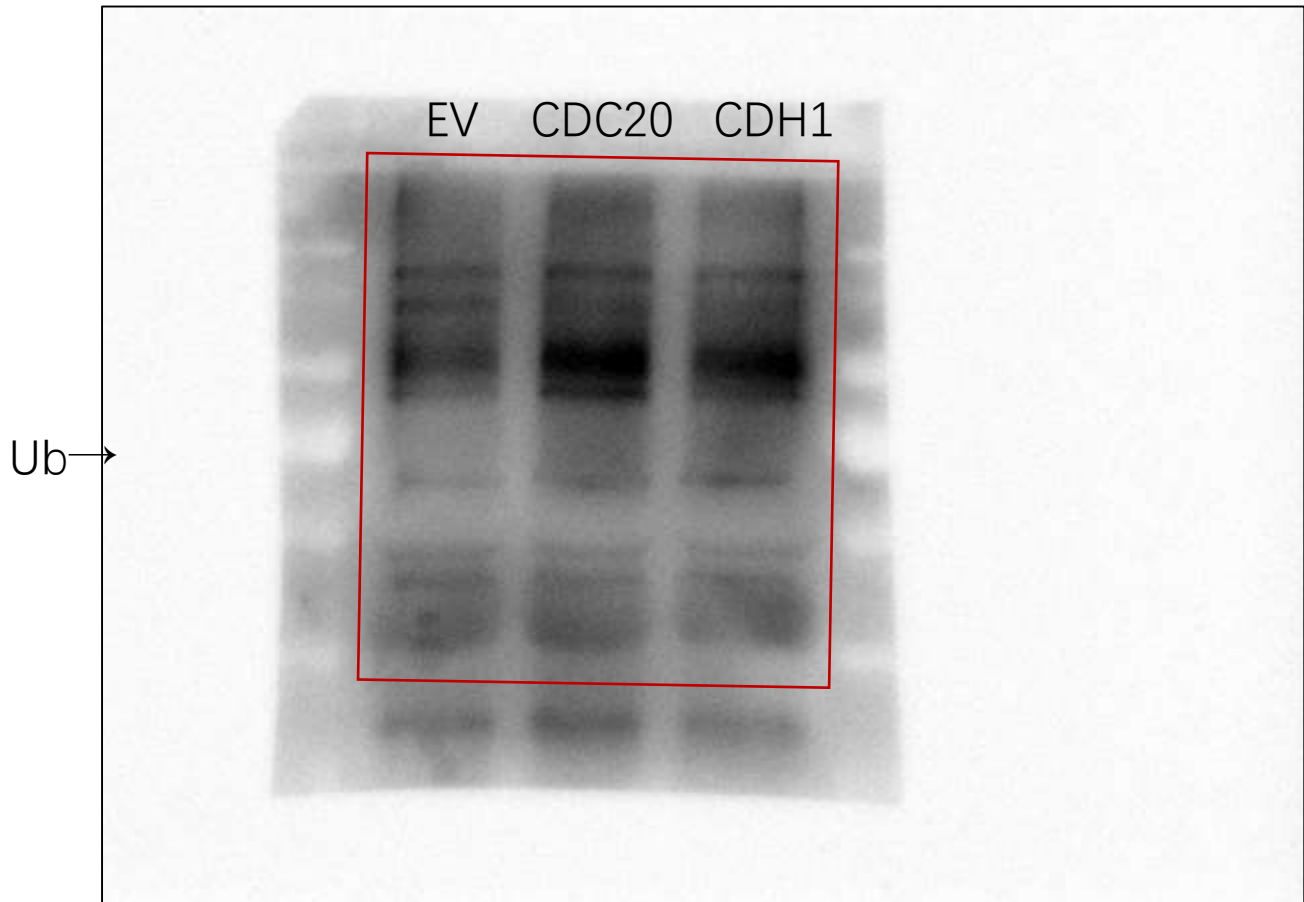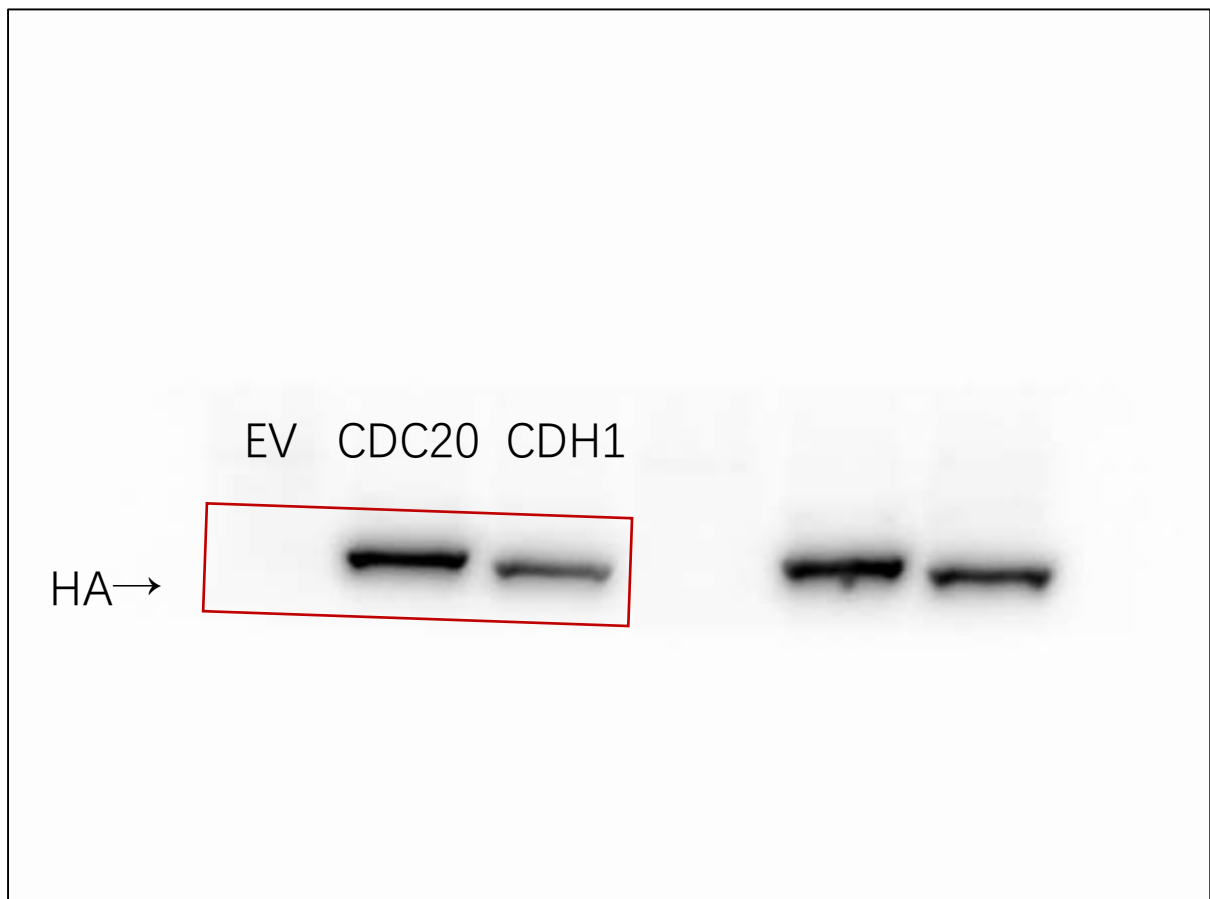

# Original images of western blots of FLAG & actin in figure 4c

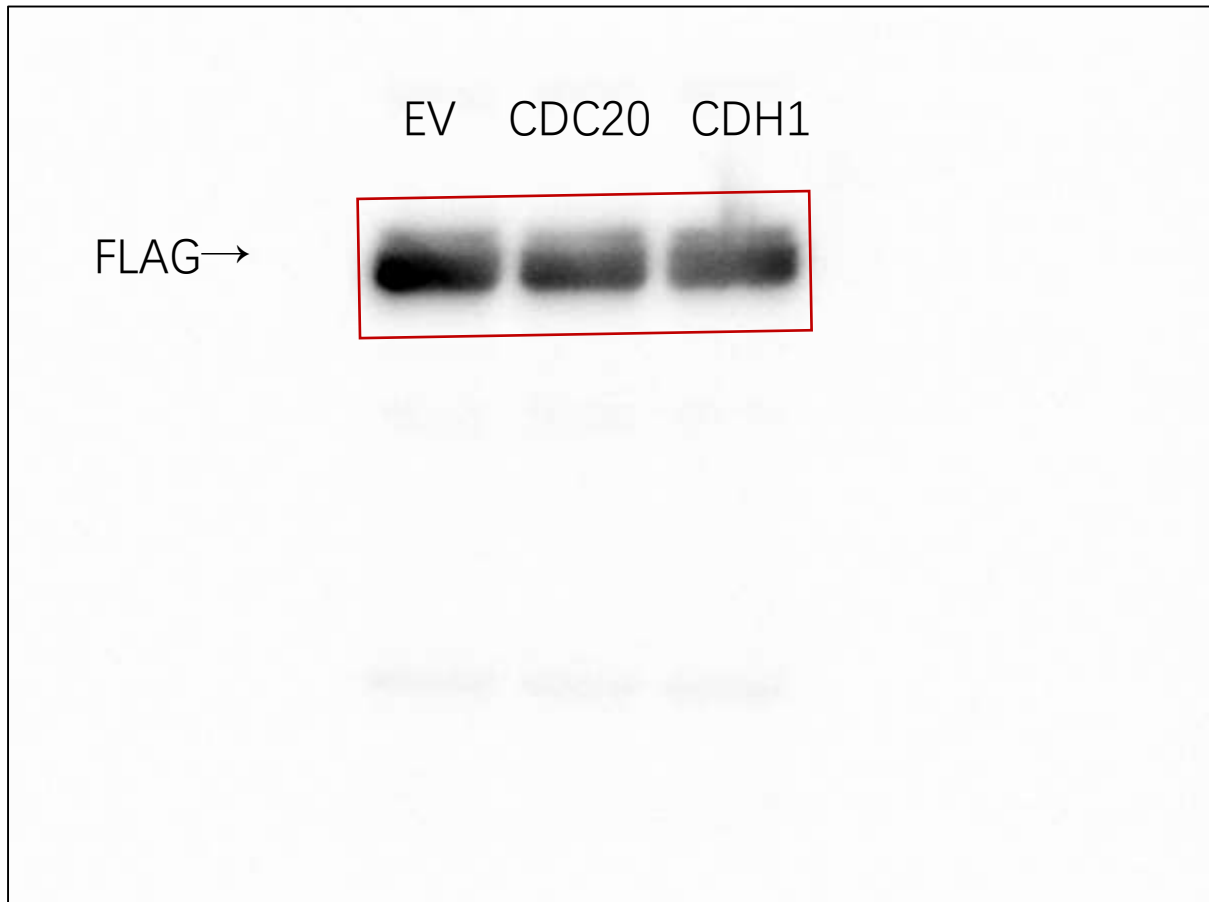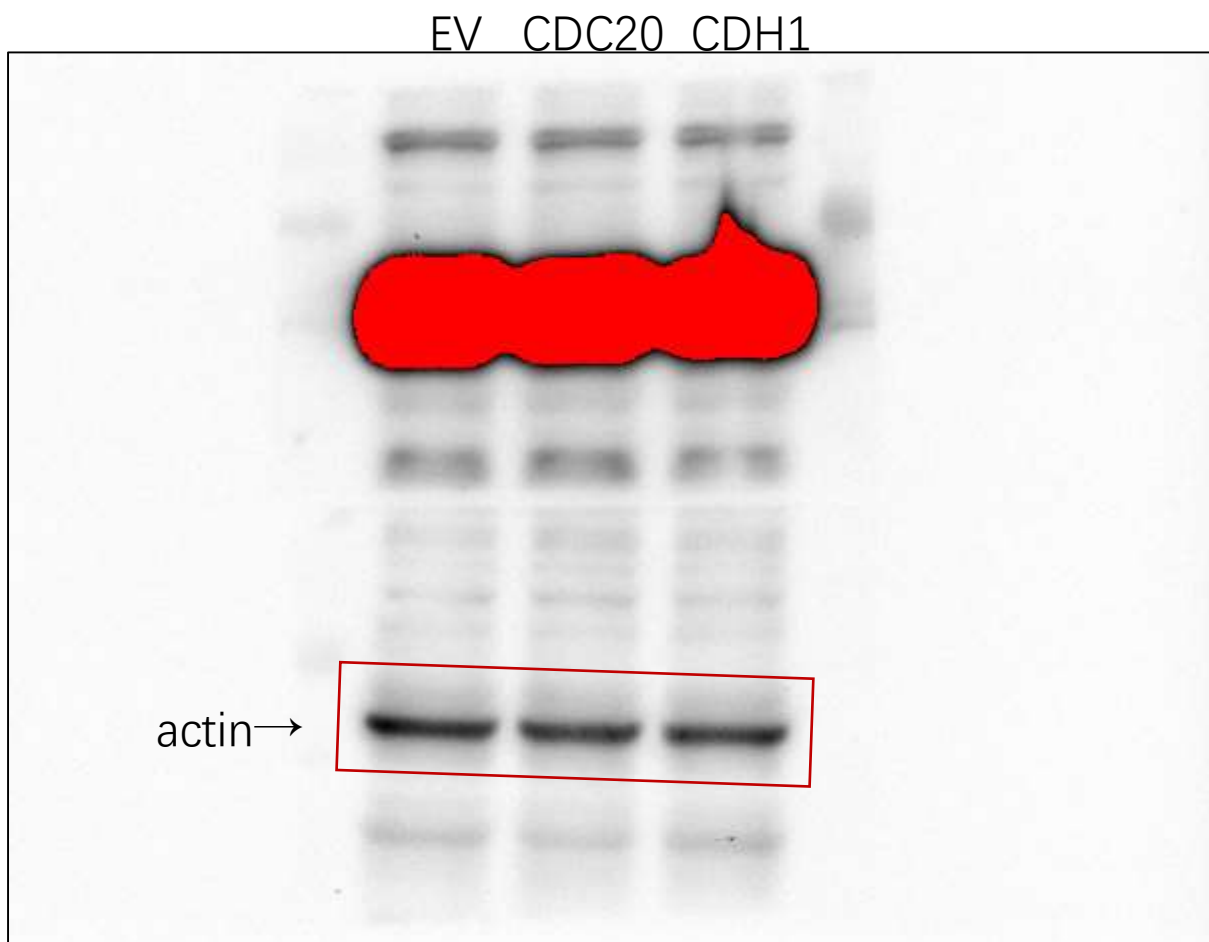

# Original images of western blots of WT FLAG in figure 4e CDC20 & CDH1

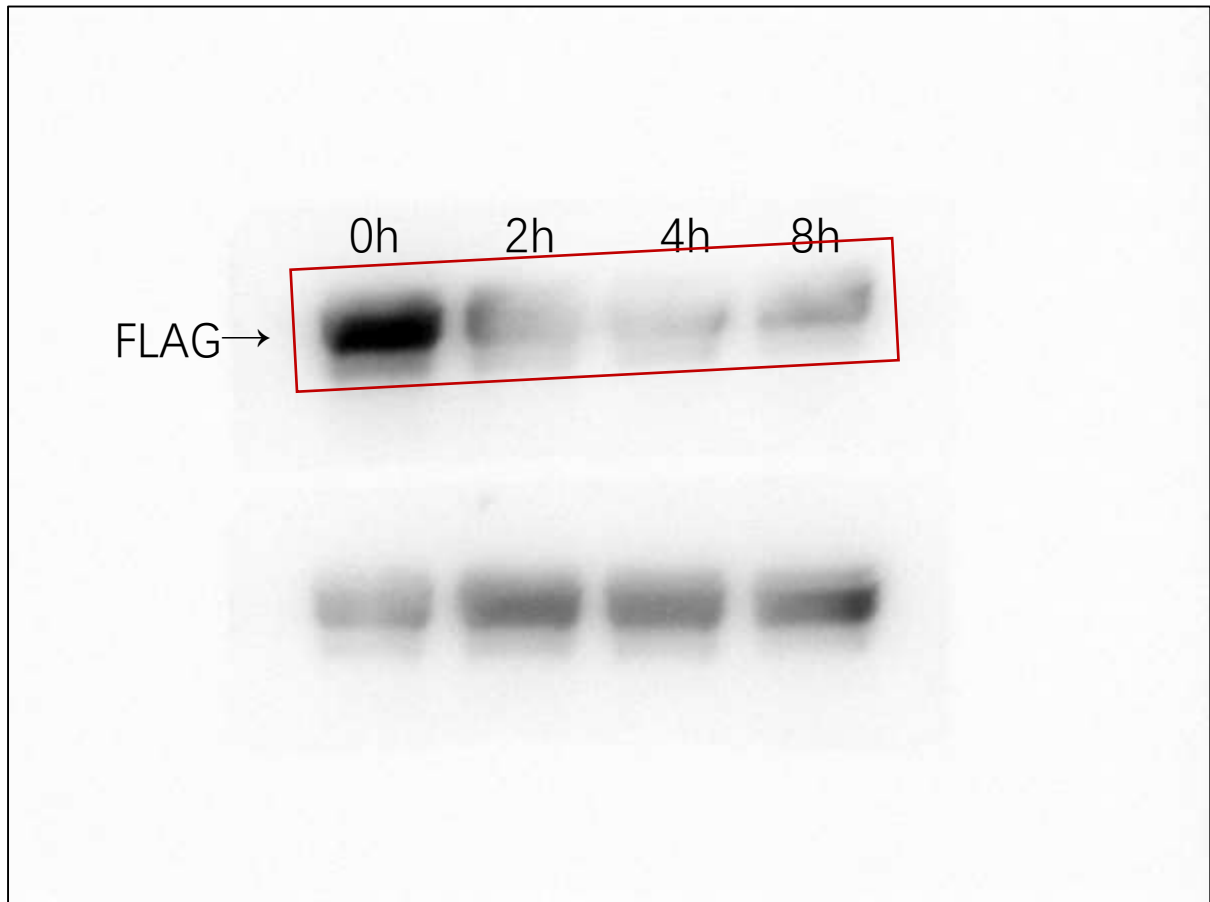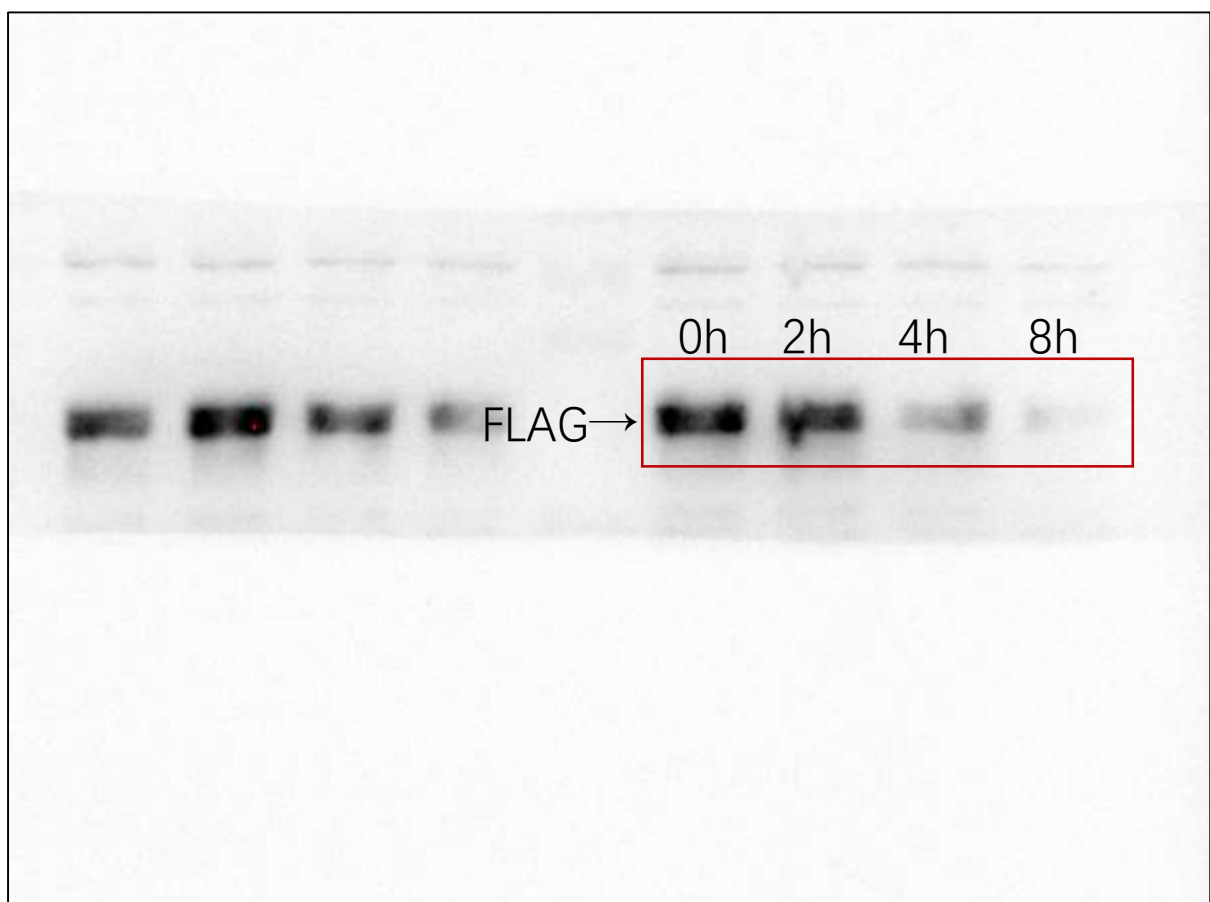

# Original images of western blots of WT actin in figure 4e CDC20 & CDH1

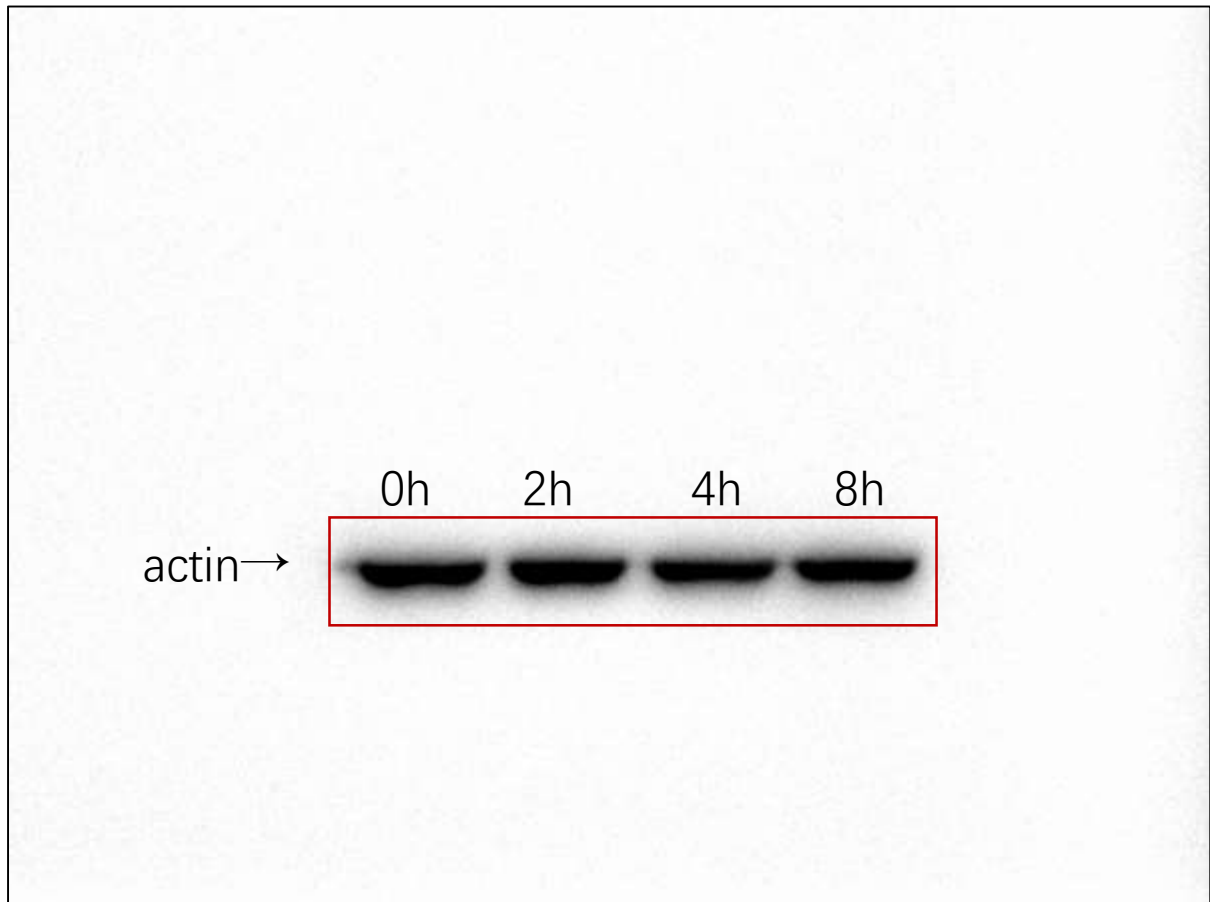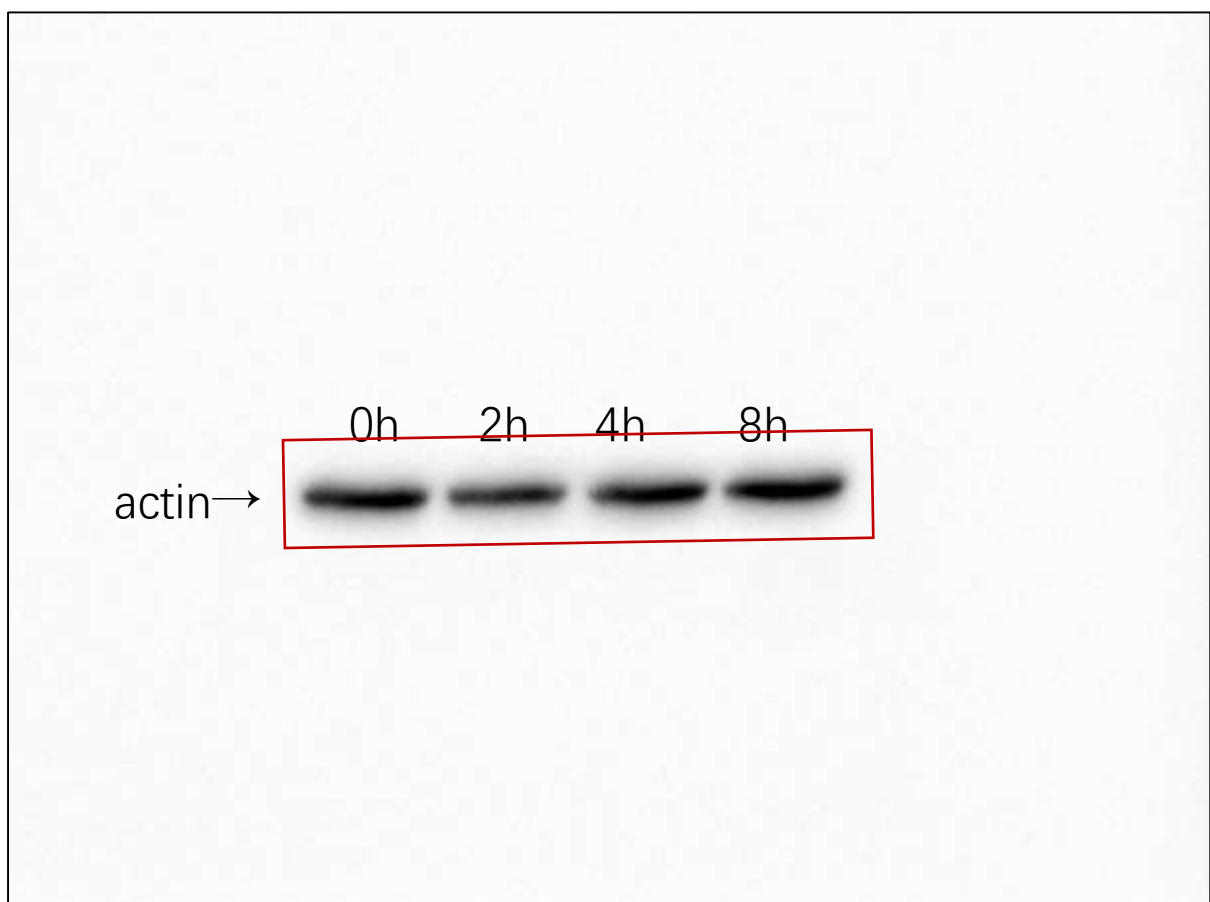

# Original images of western blots of D1A FLAG in figure 4e CDC20 & CDH1

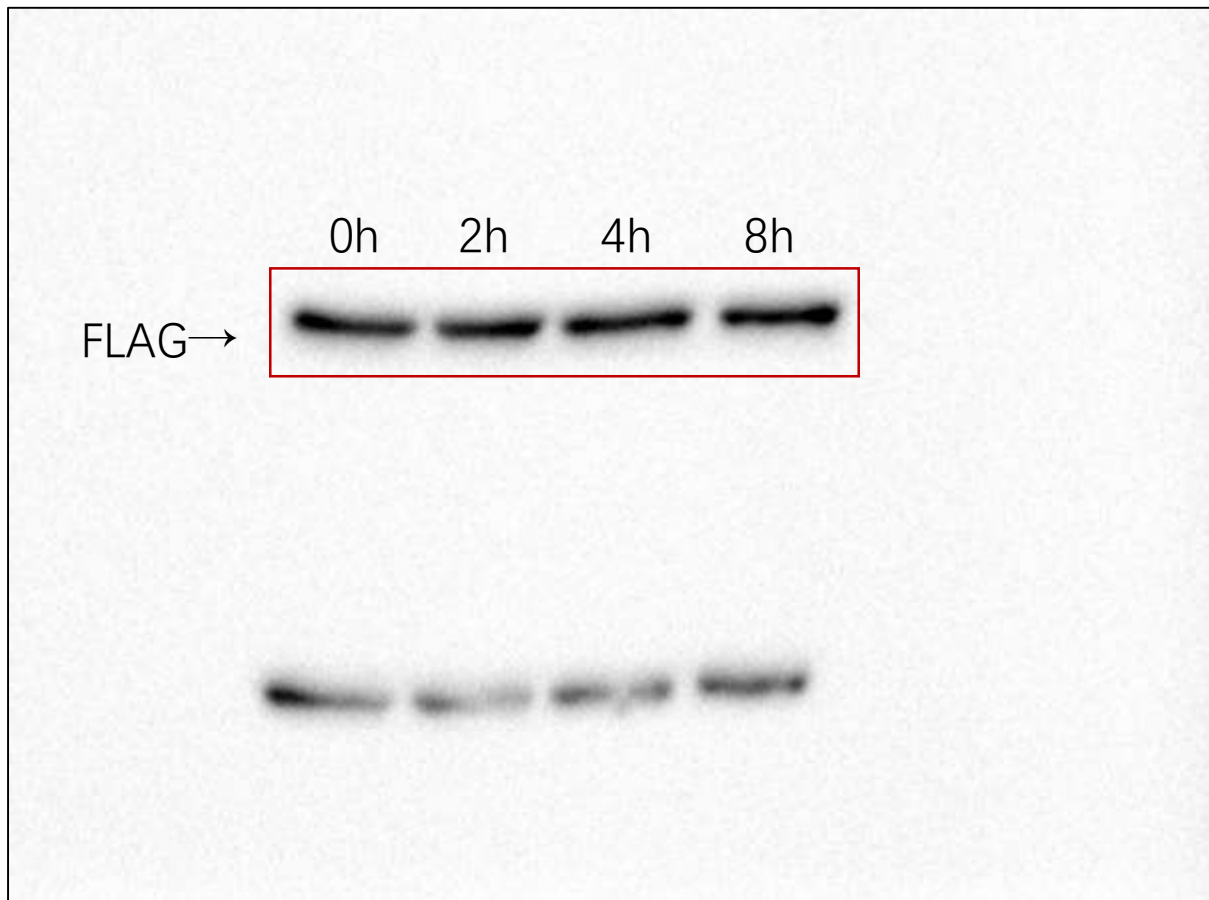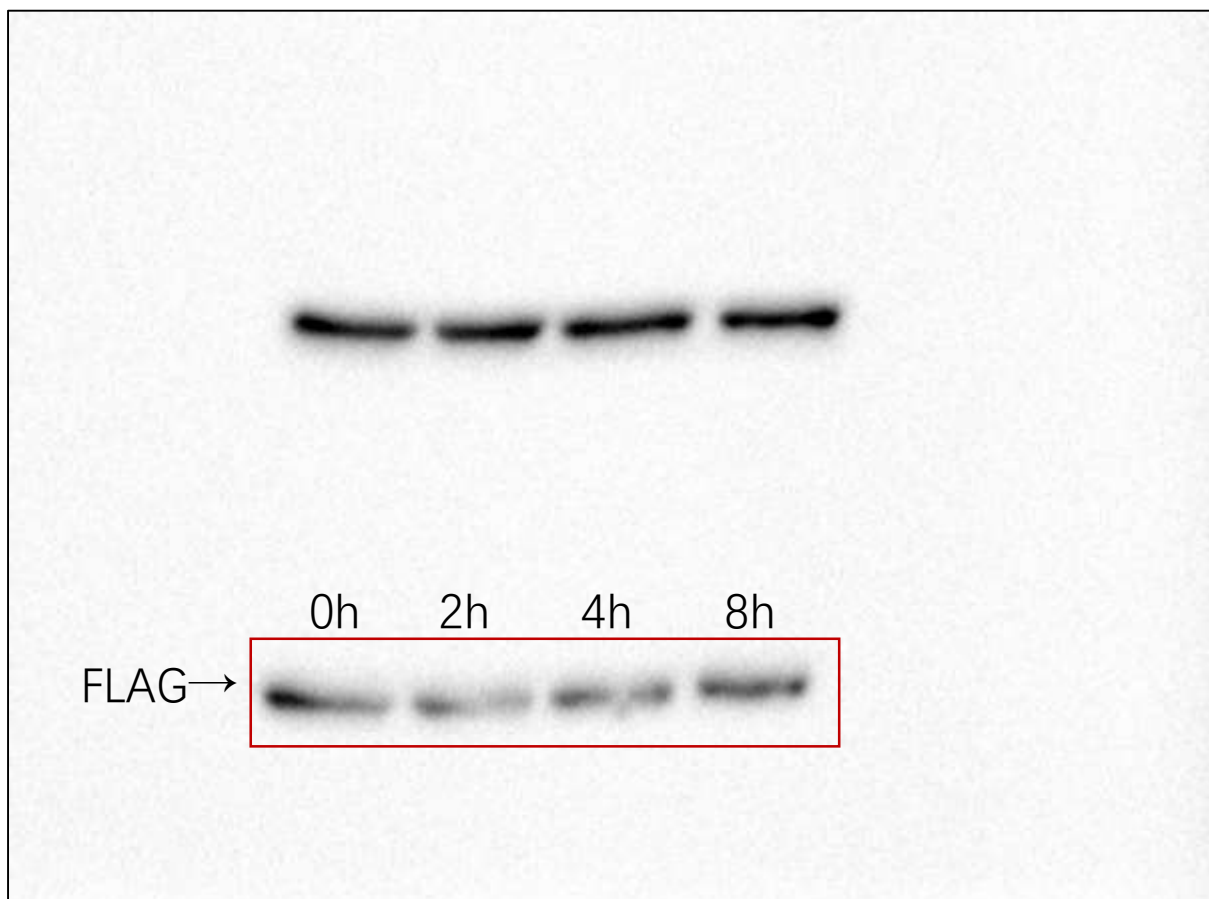

# Original images of western blots of D1A actin in figure 4e CDC20 & CDH1

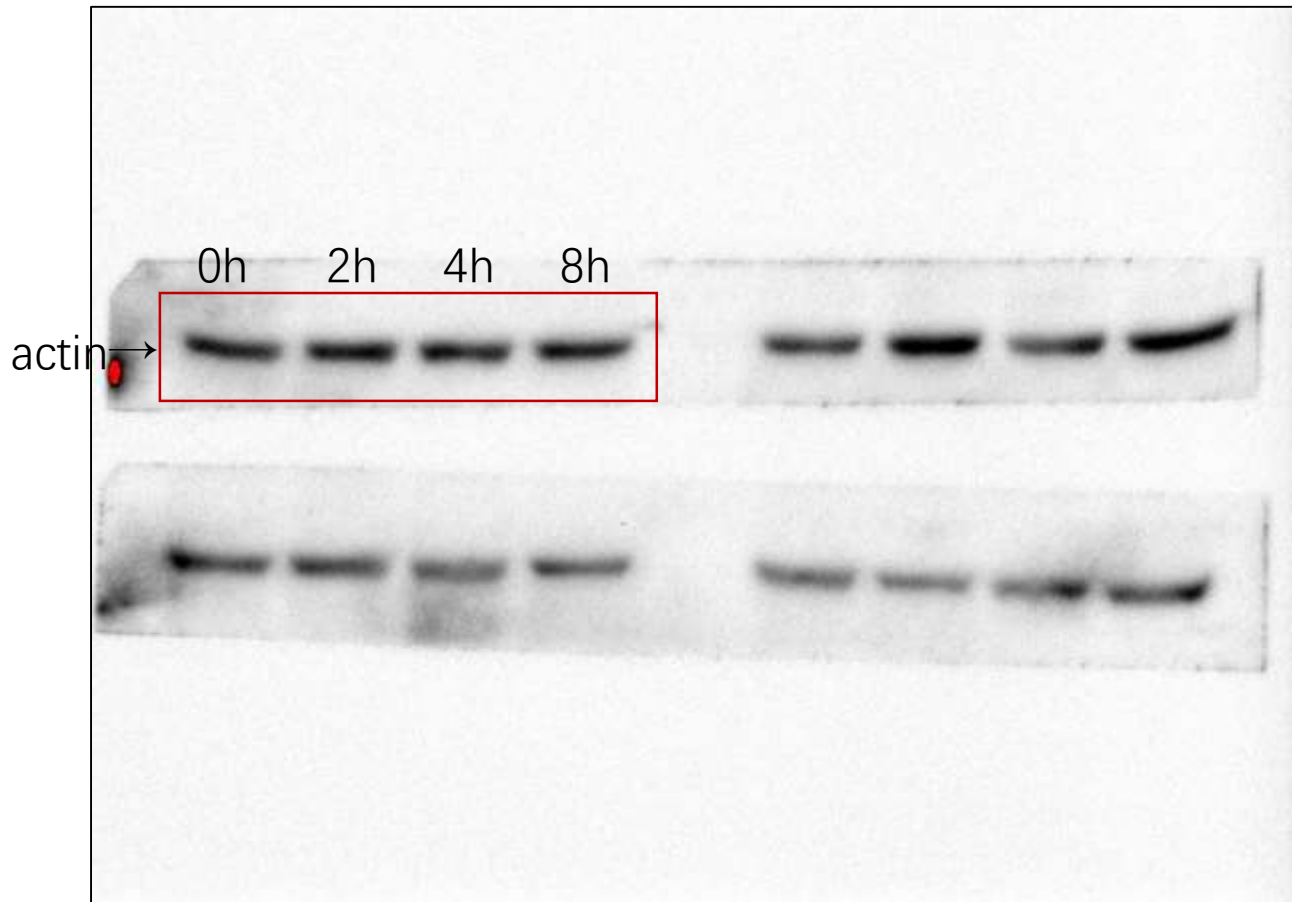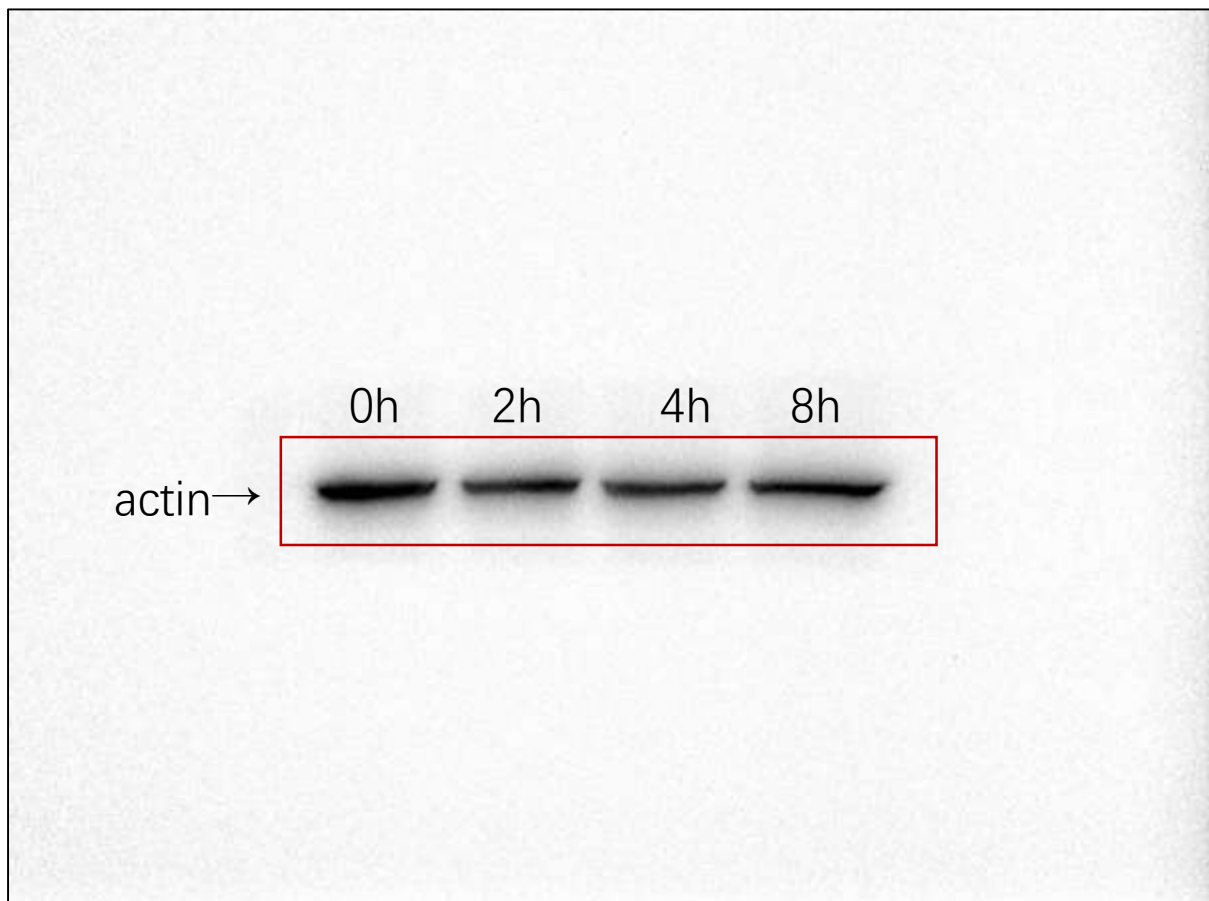

# Original images of western blots of D2A FLAG in figure 4e CDC20 & CDH1

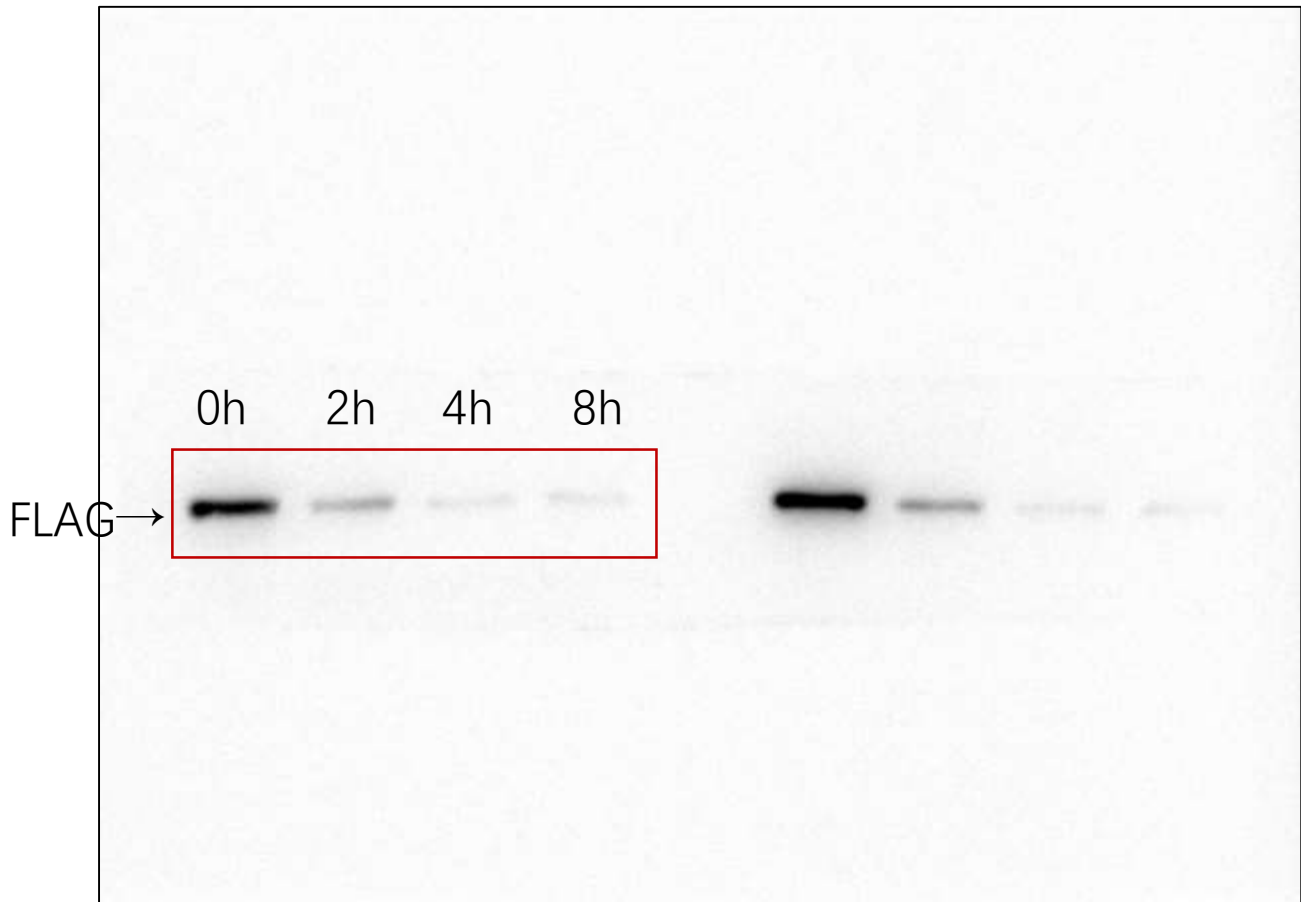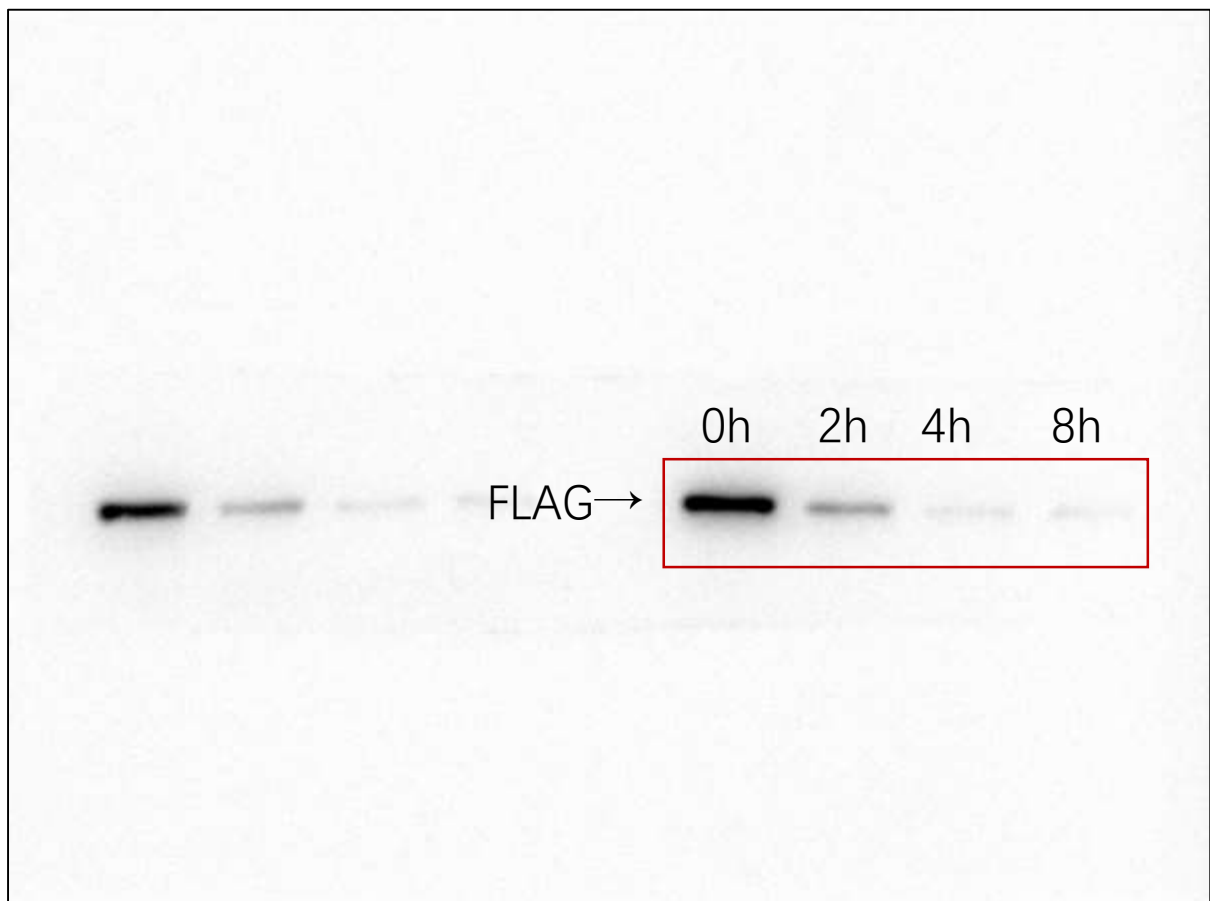

# Original images of western blots of D2A actin in figure 4e CDC20 & CDH1

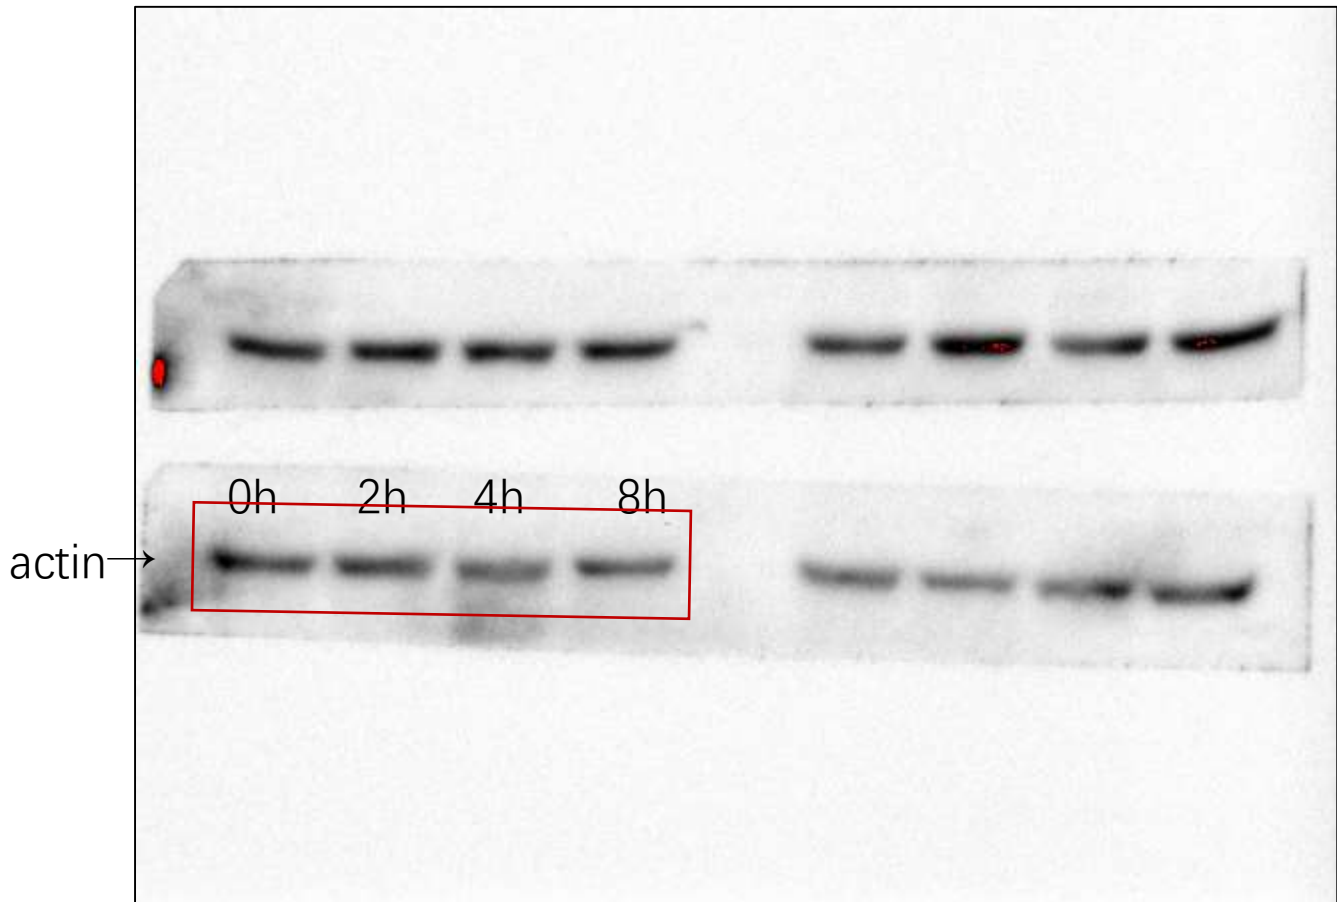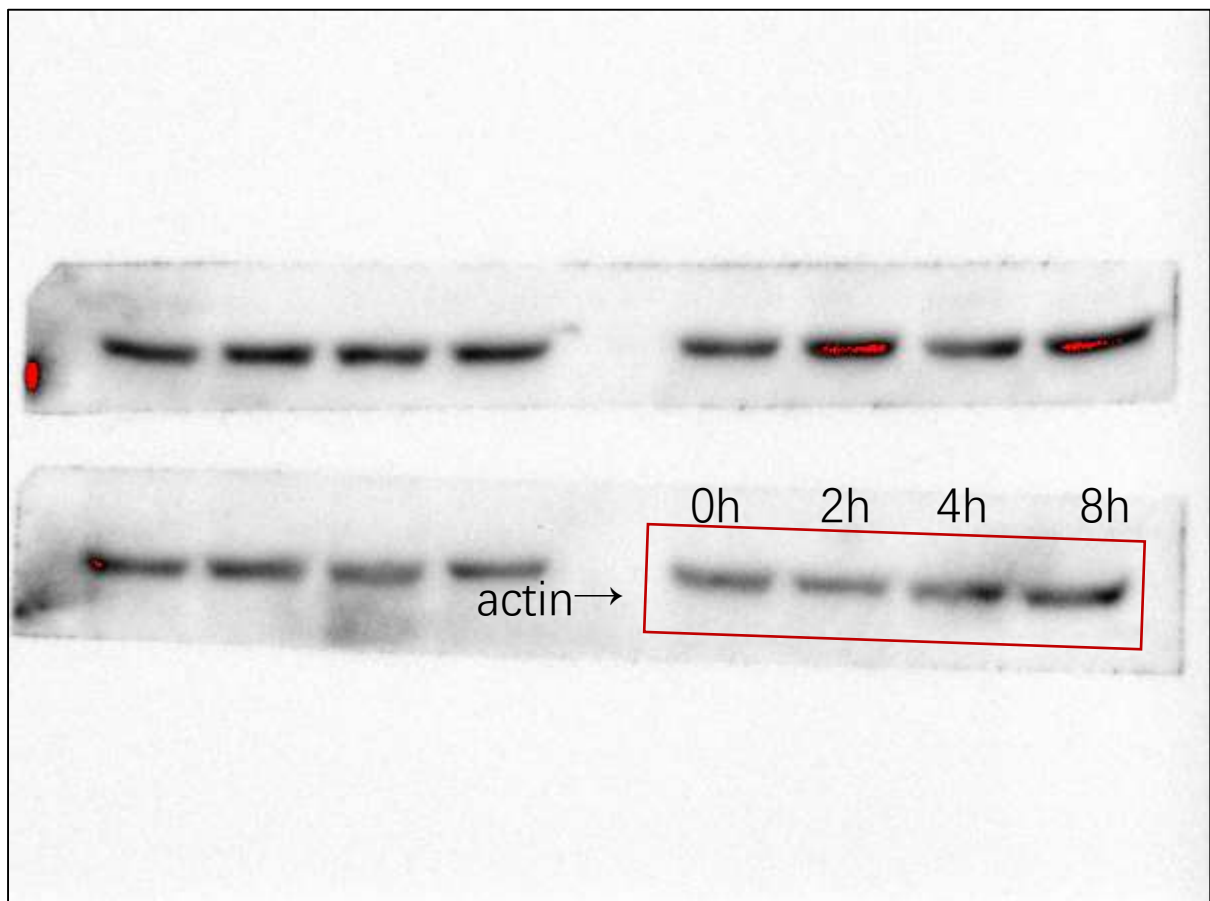



# Original images of western blots of D3A FLAG in figure 4e CDC20 & CDH1

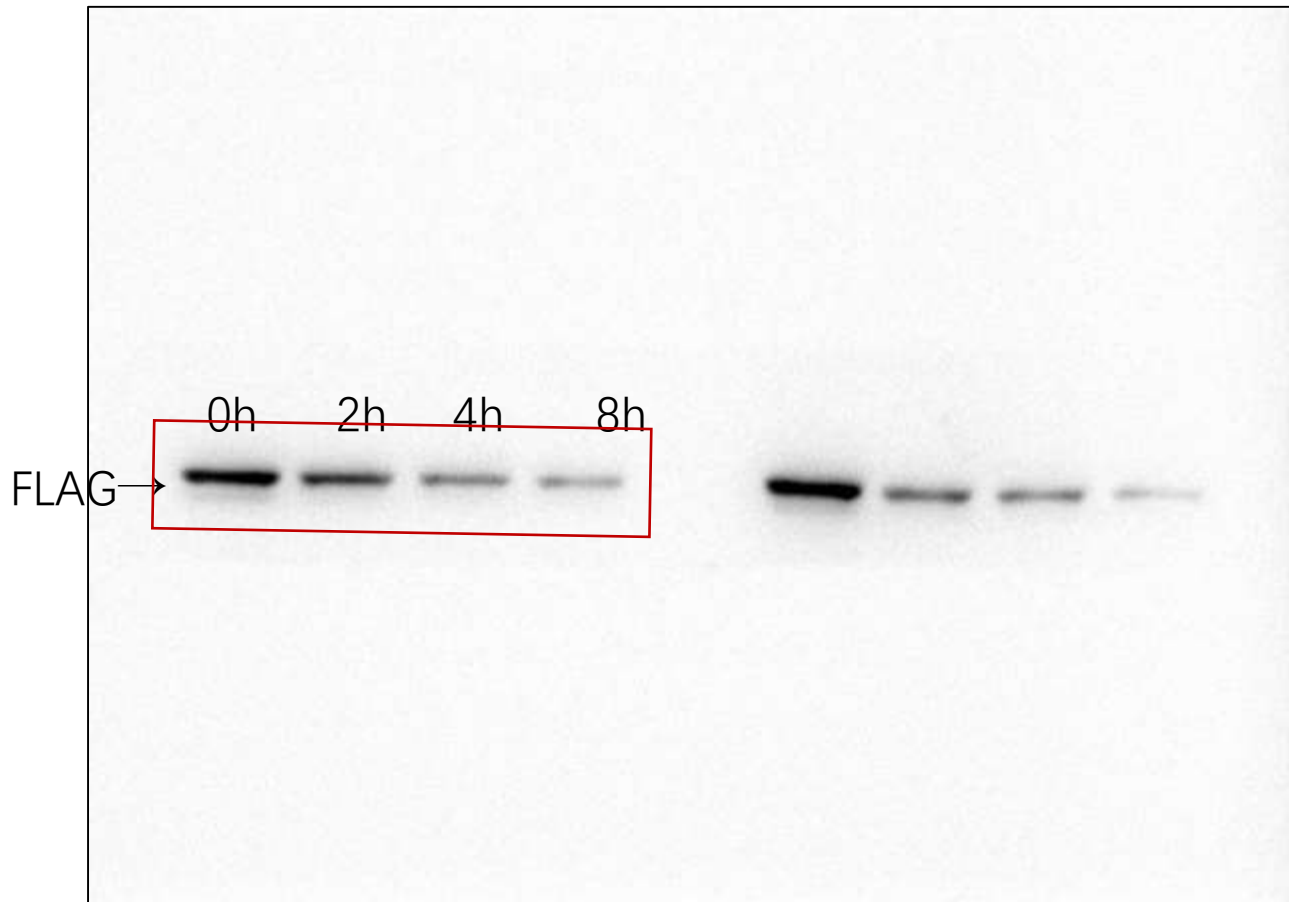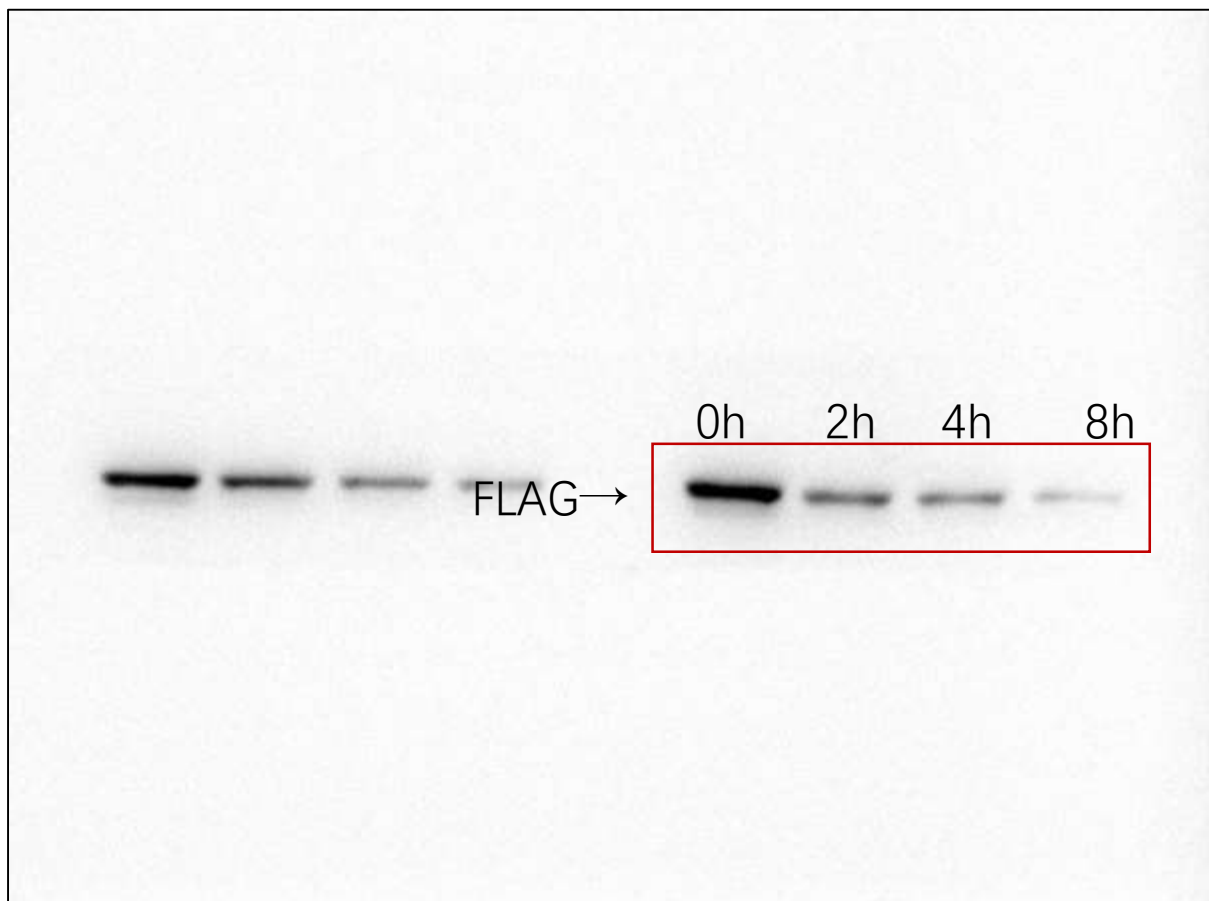

Original images of western blots of D3A actin in figure 4e CDC20 & CDH1

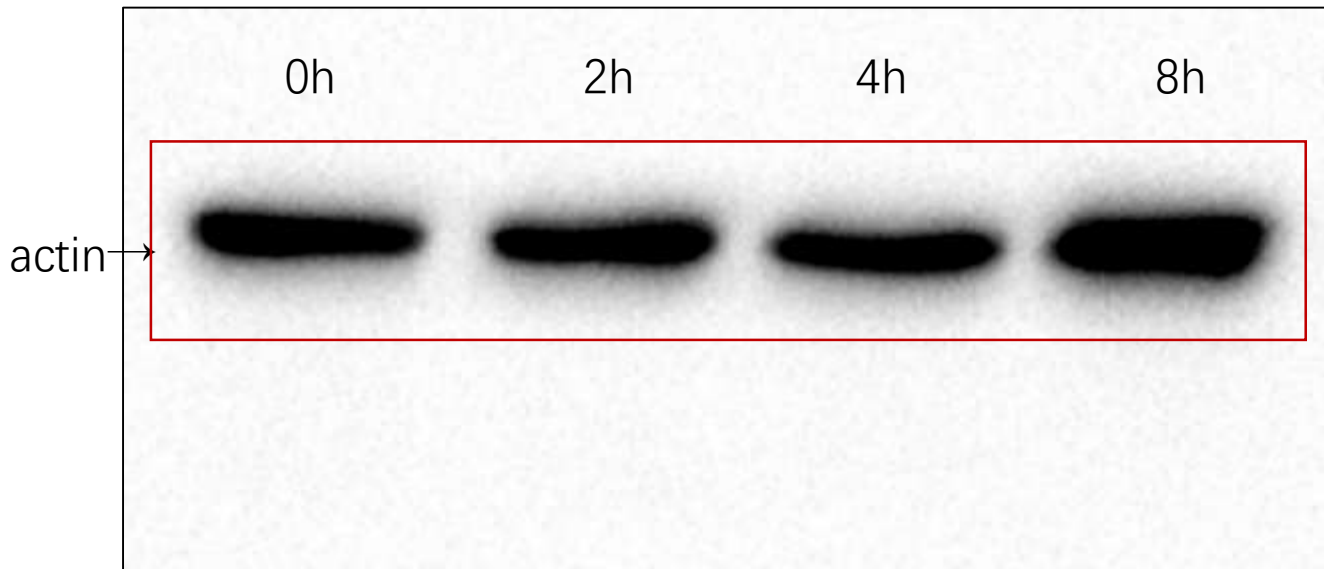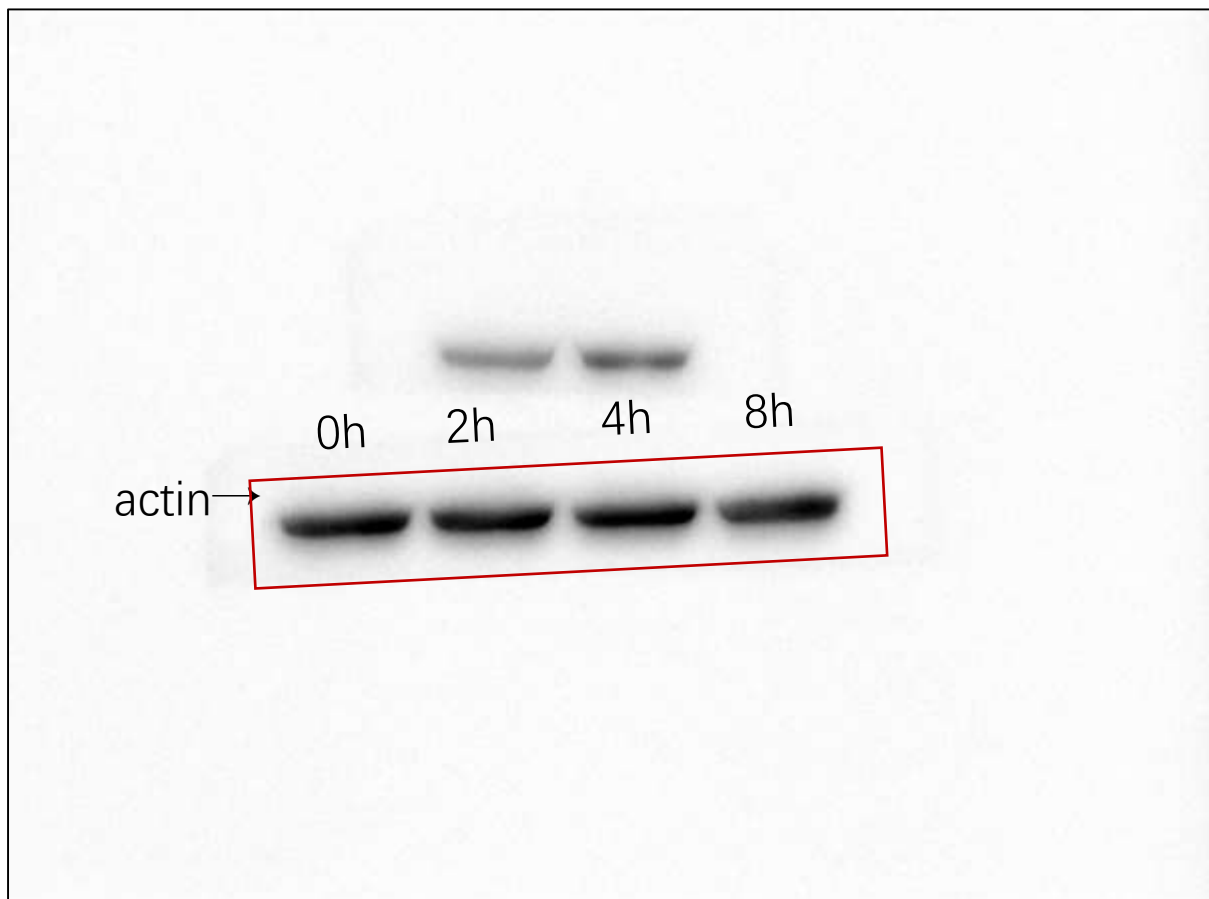

# Original images of western blots of SIRT6-FLAG and CDH1 in figure 5a 293T

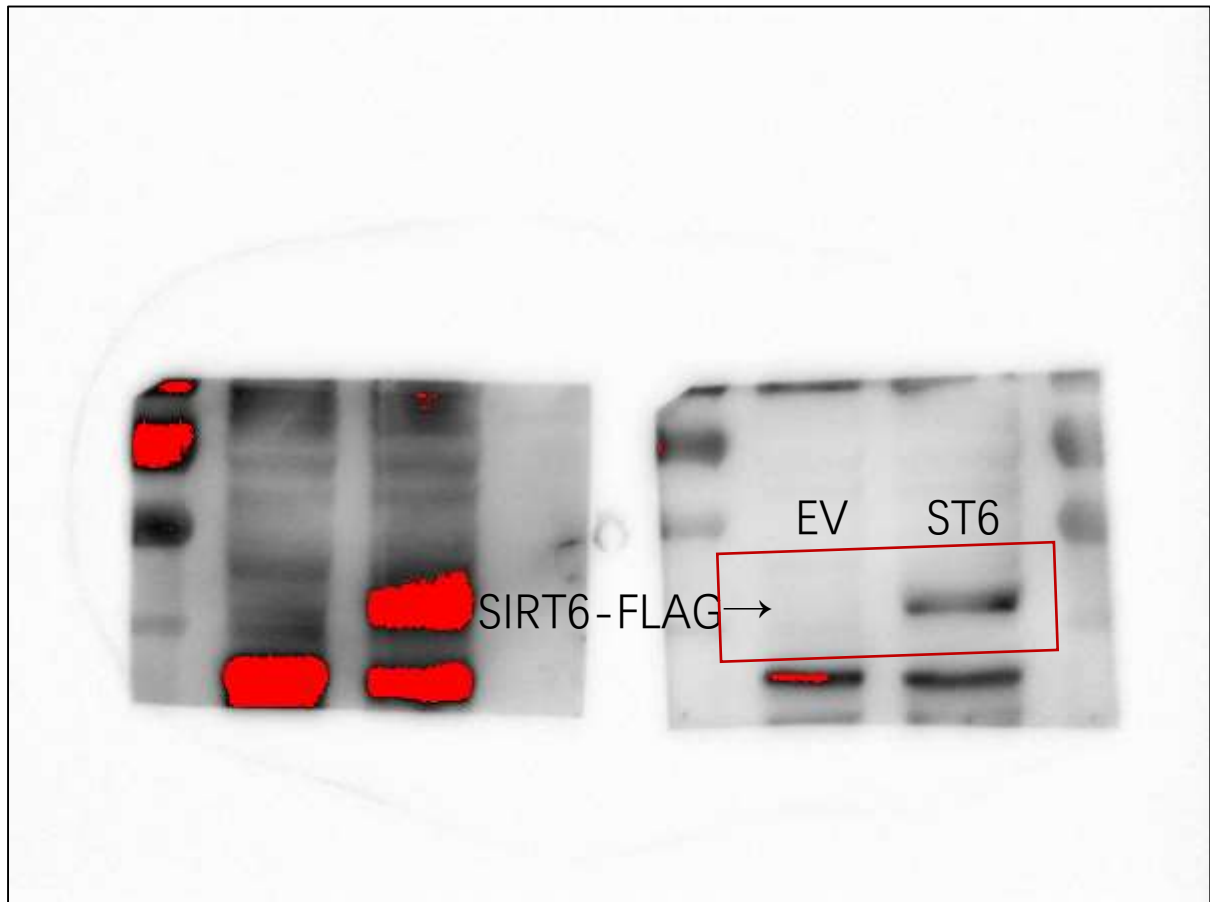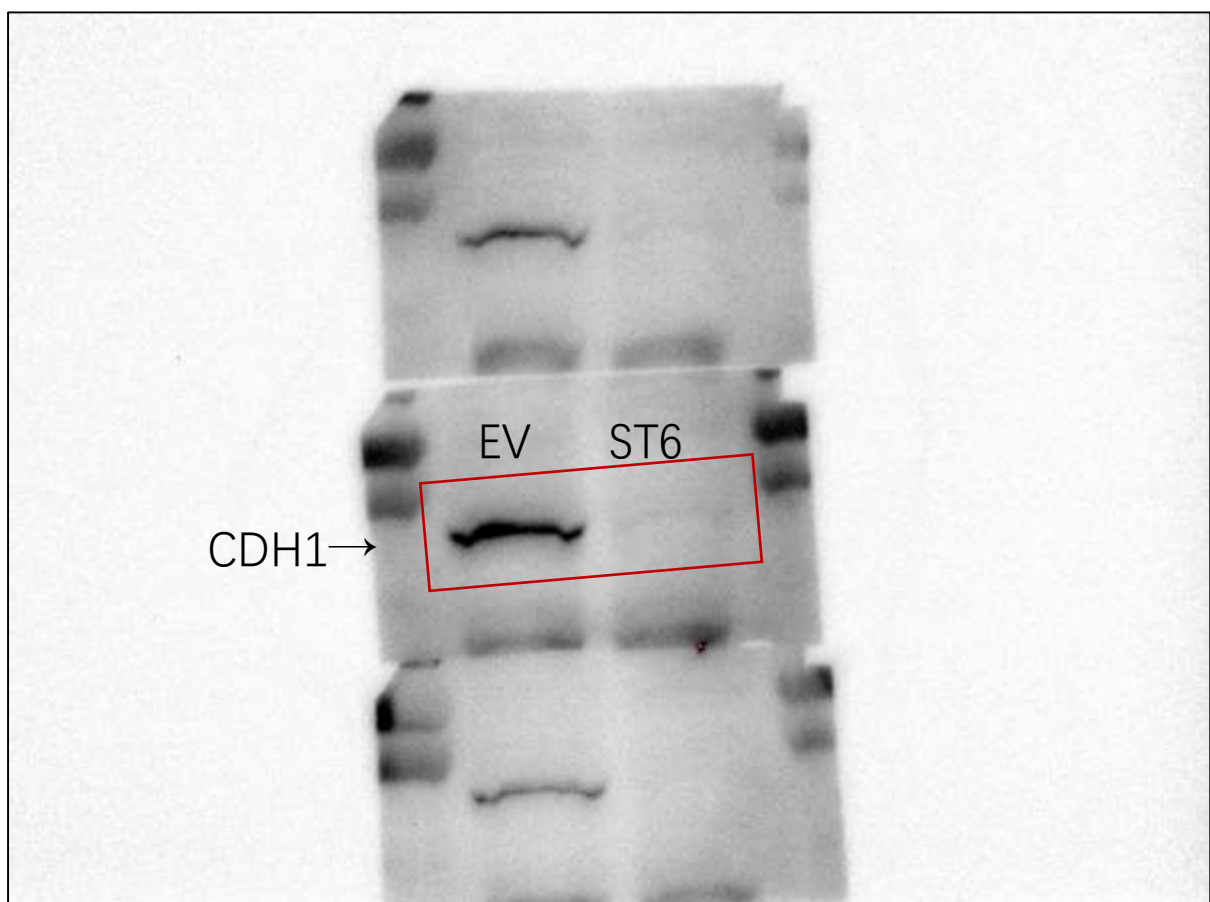

# Original images of western blots of HSP70 in figure 5a 293T

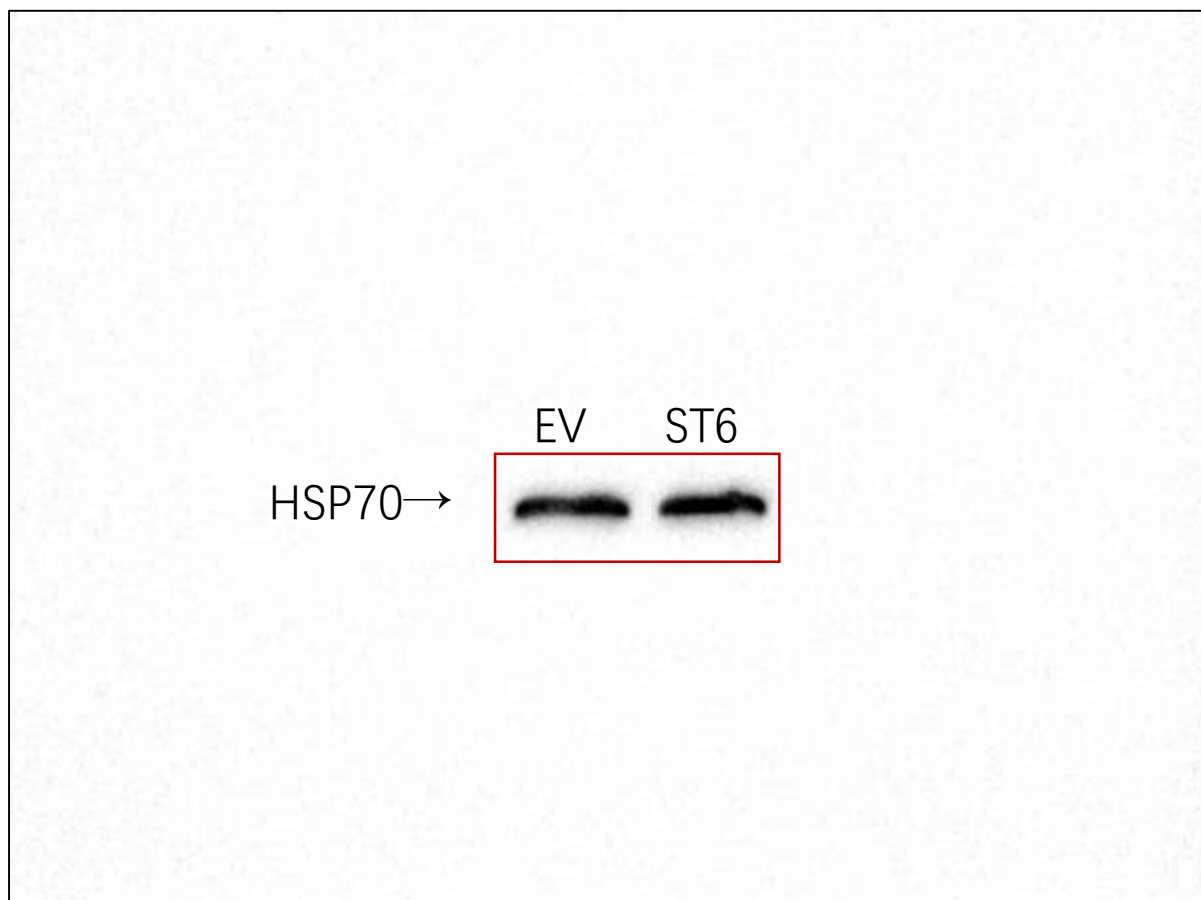

# Original images of western blots of SIRT6-FLAG and CDH1 in figure 5a HeLa

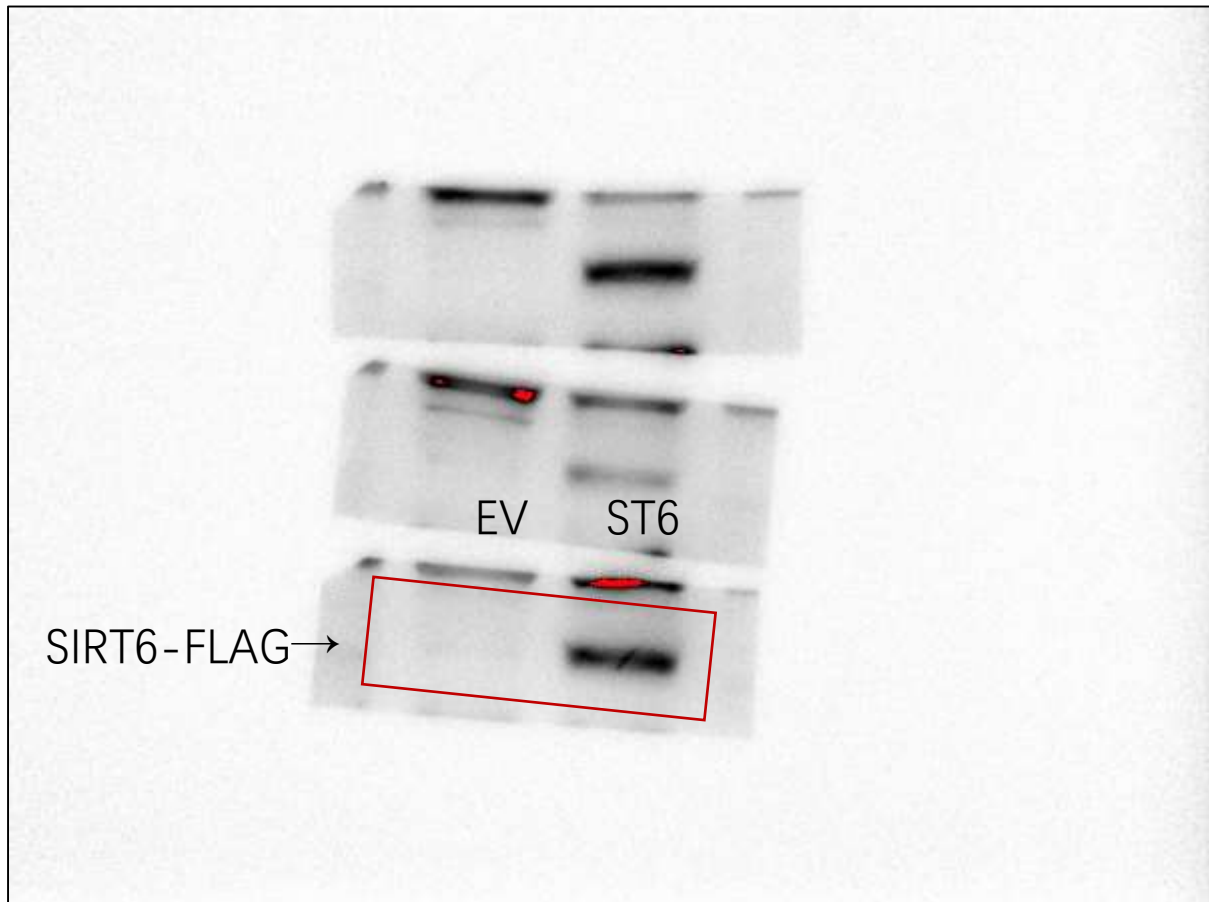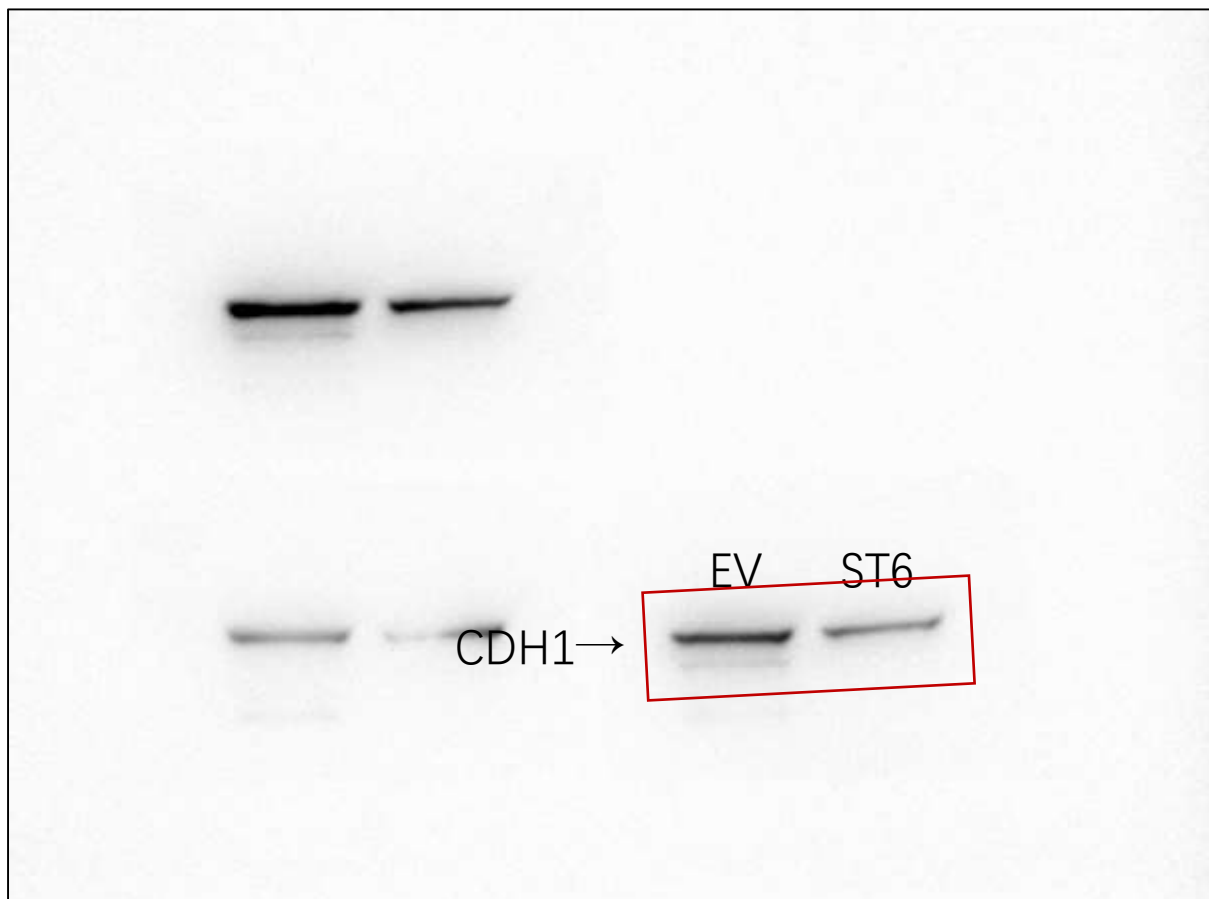

Original images of western blots of HSP70 in figure 5a HeLa

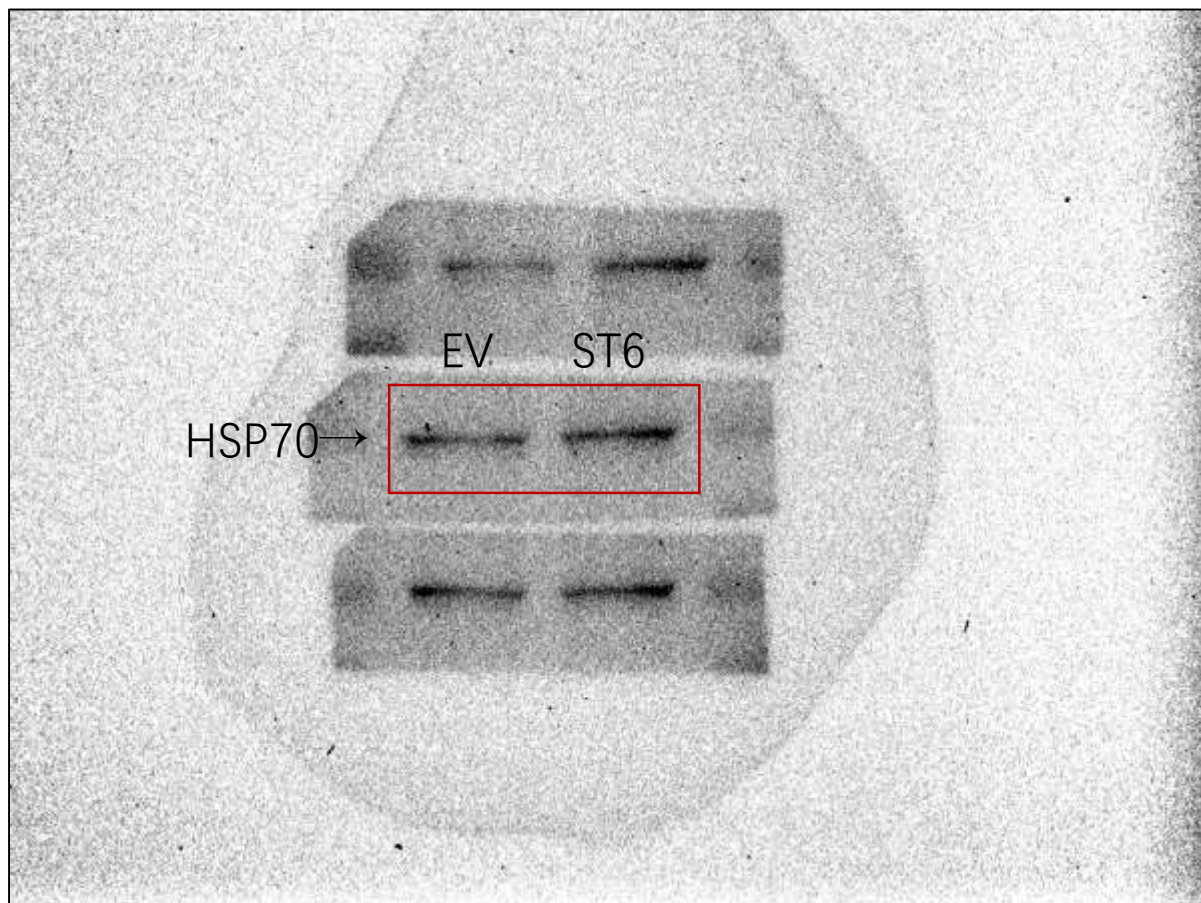

# Original images of western blots of SIRT6 and CDH1 in figure 5b 293T

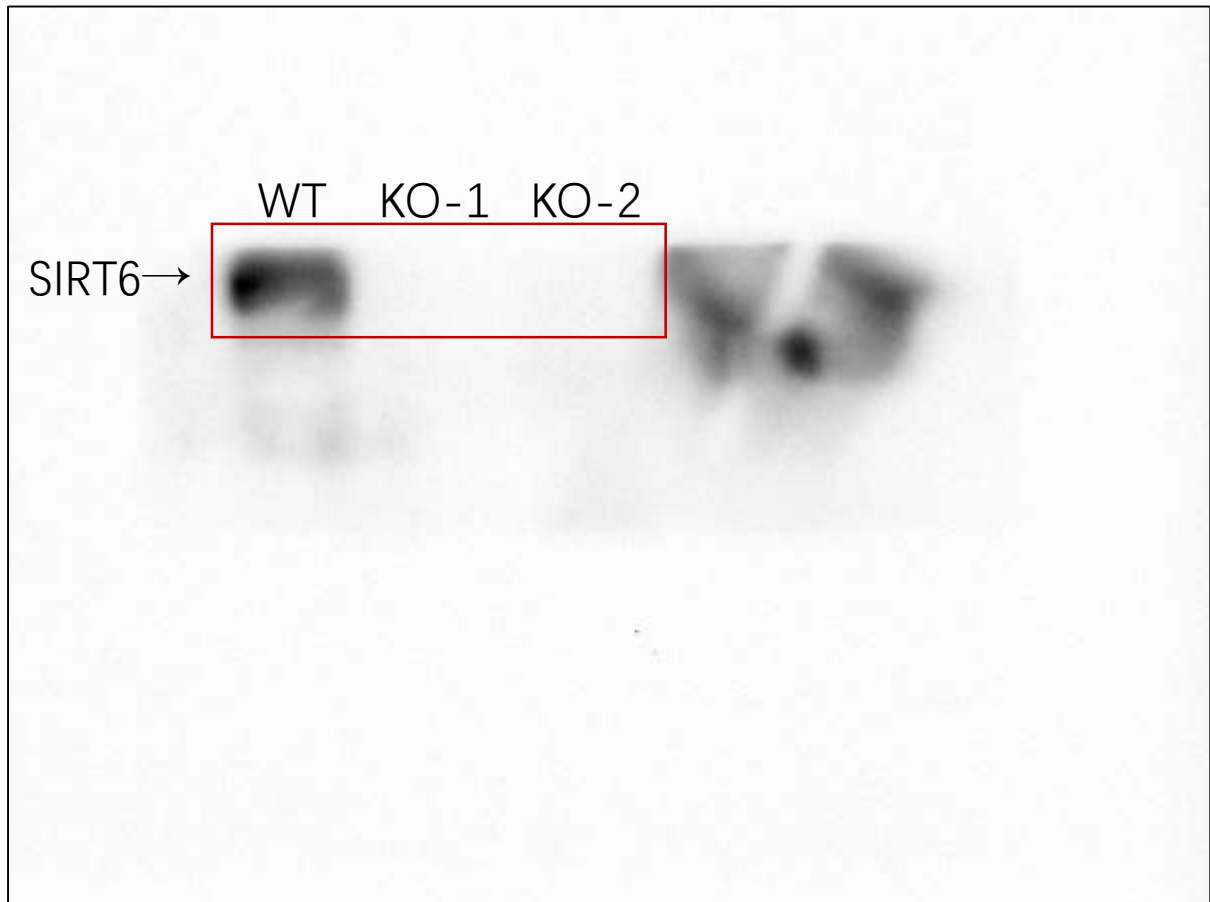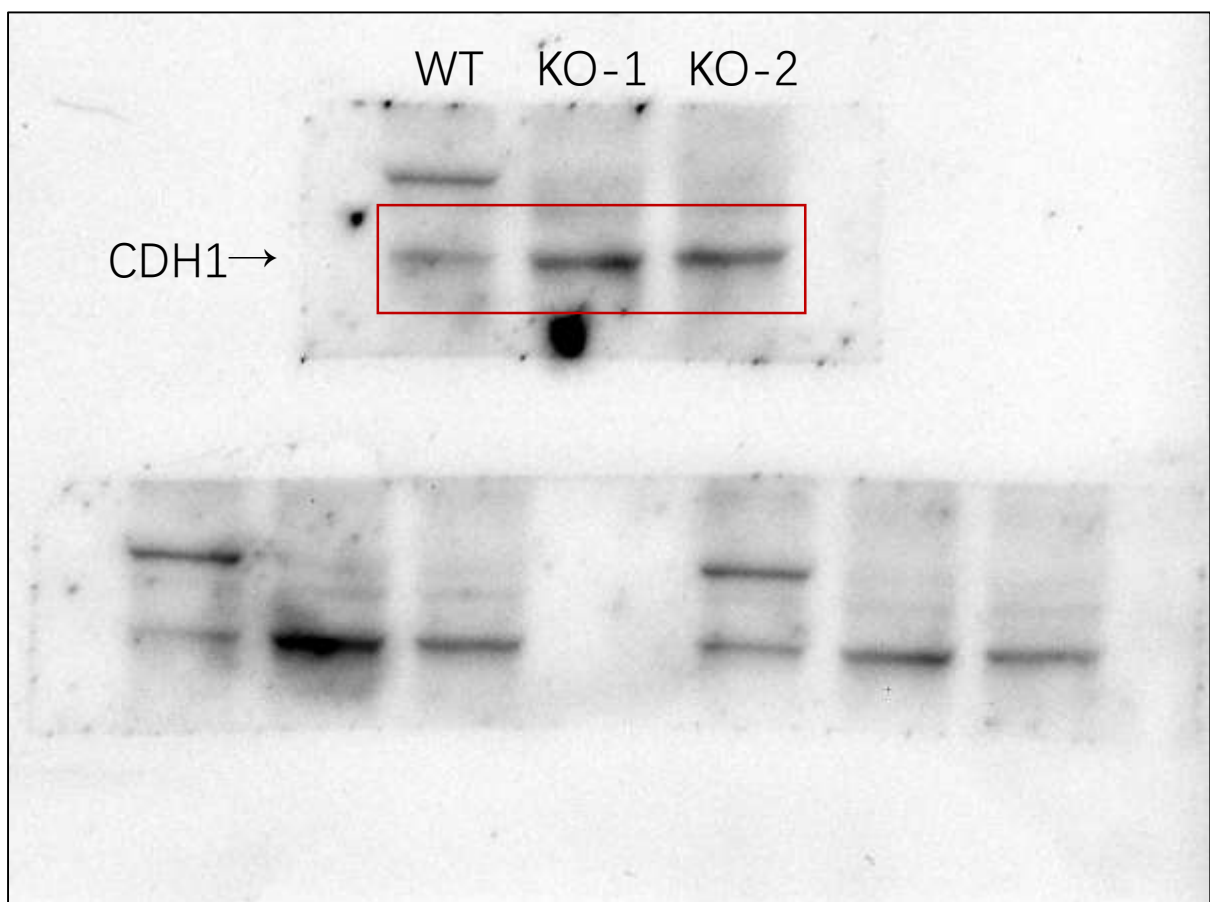

Original images of western blots of GAPDH in figure 5b 293T

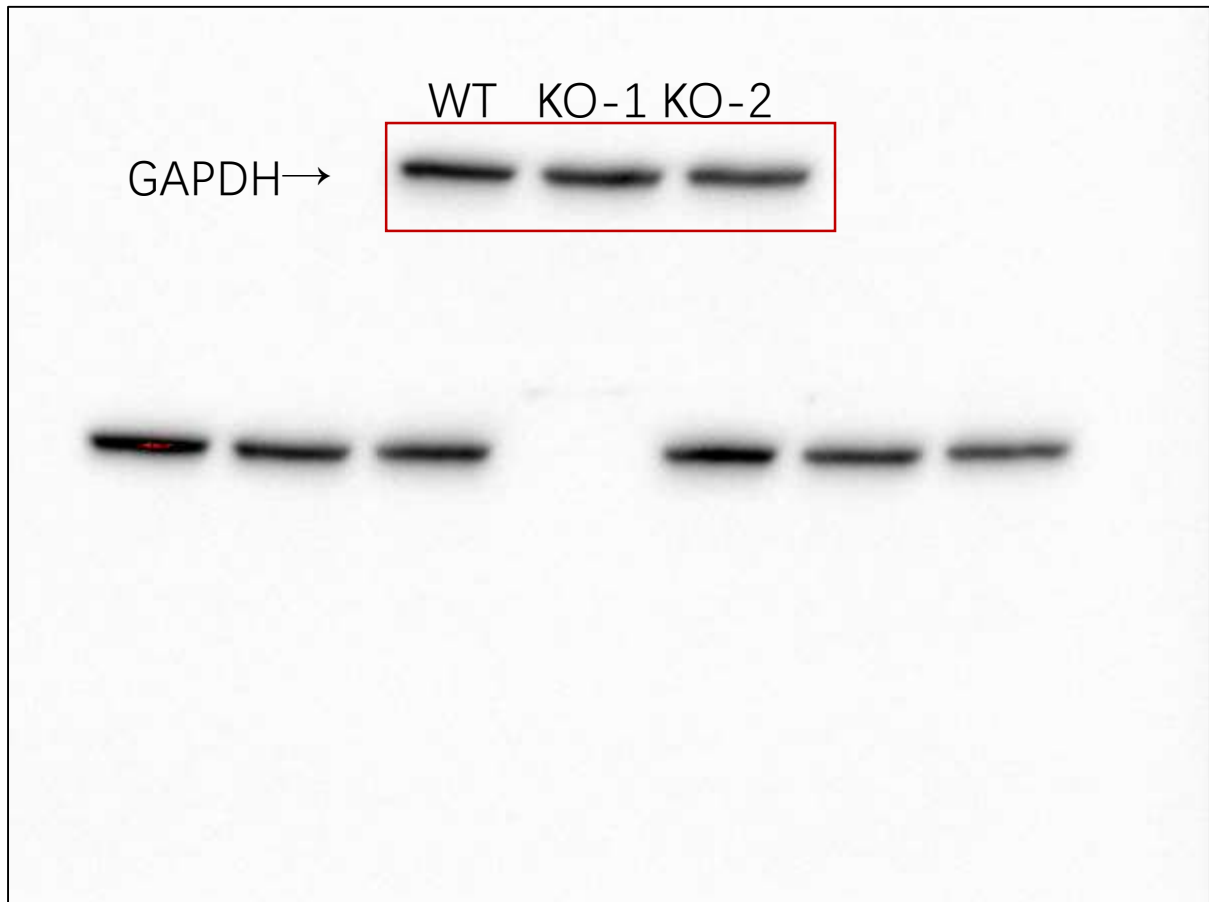



# Original images of western blots of SIRT6 and CDH1 in figure 5b HeLa

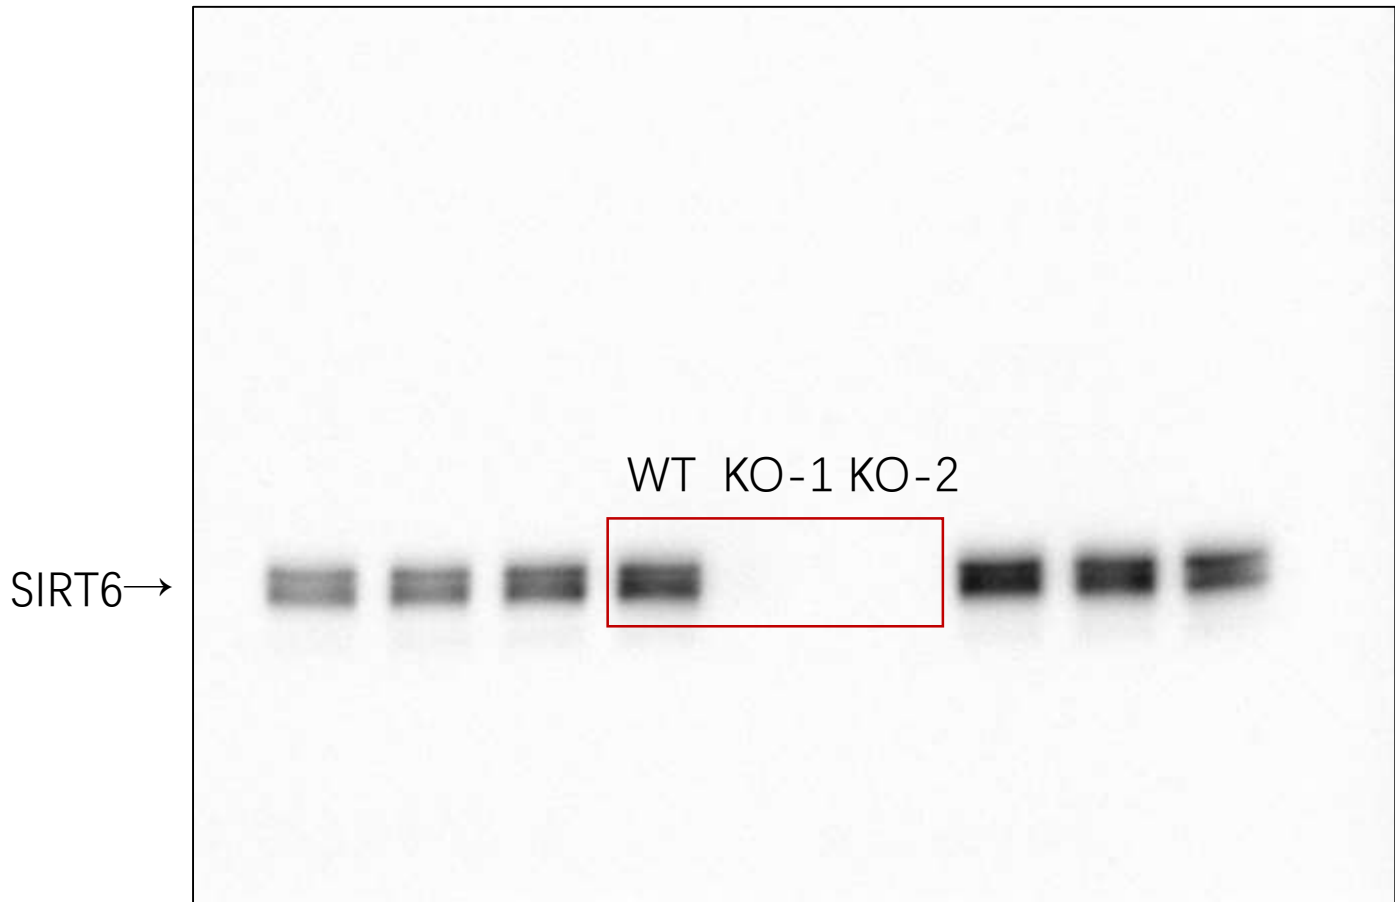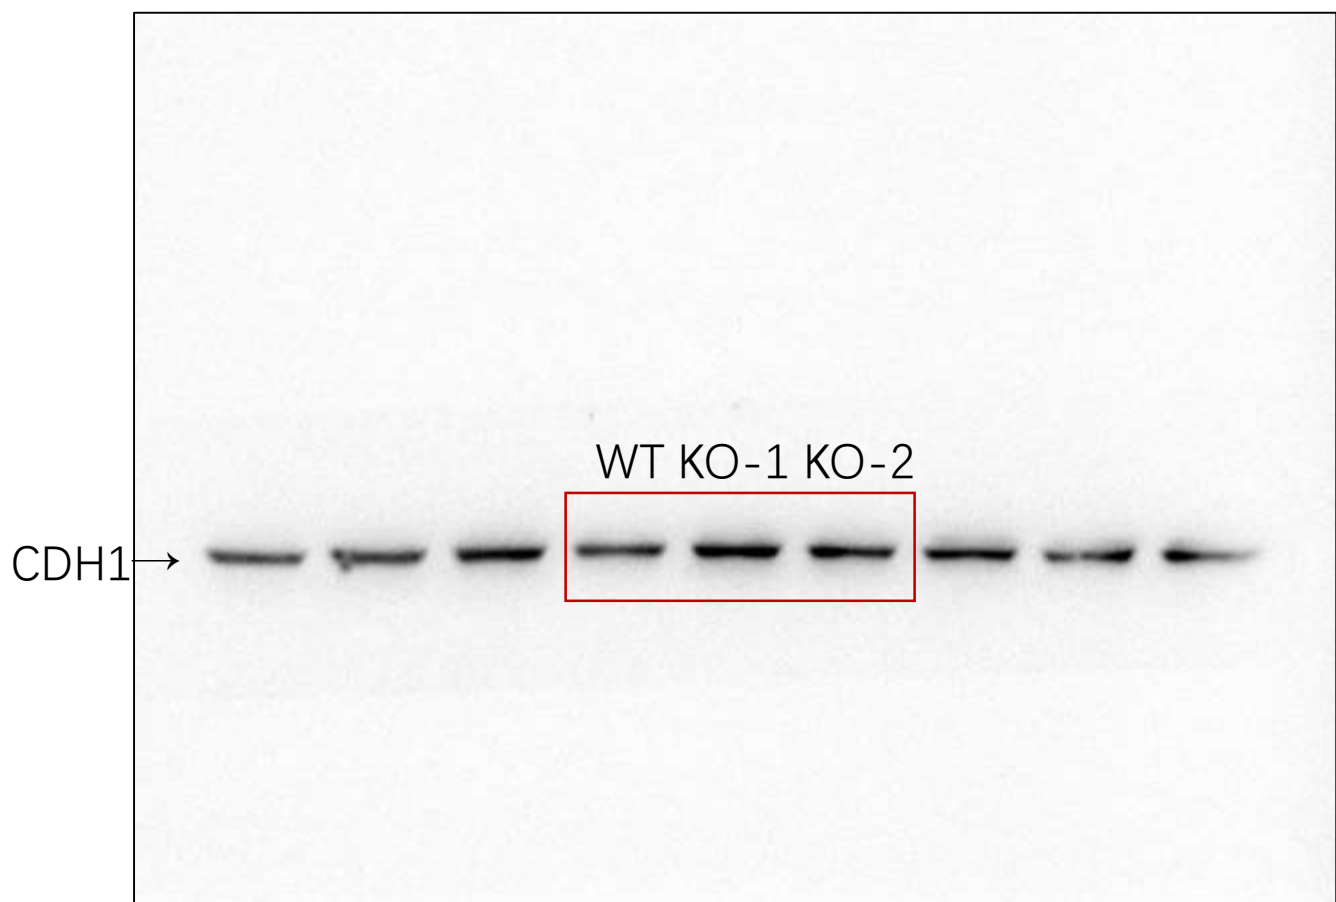

# Original images of western blots of GAPDH in figure 5b HeLa

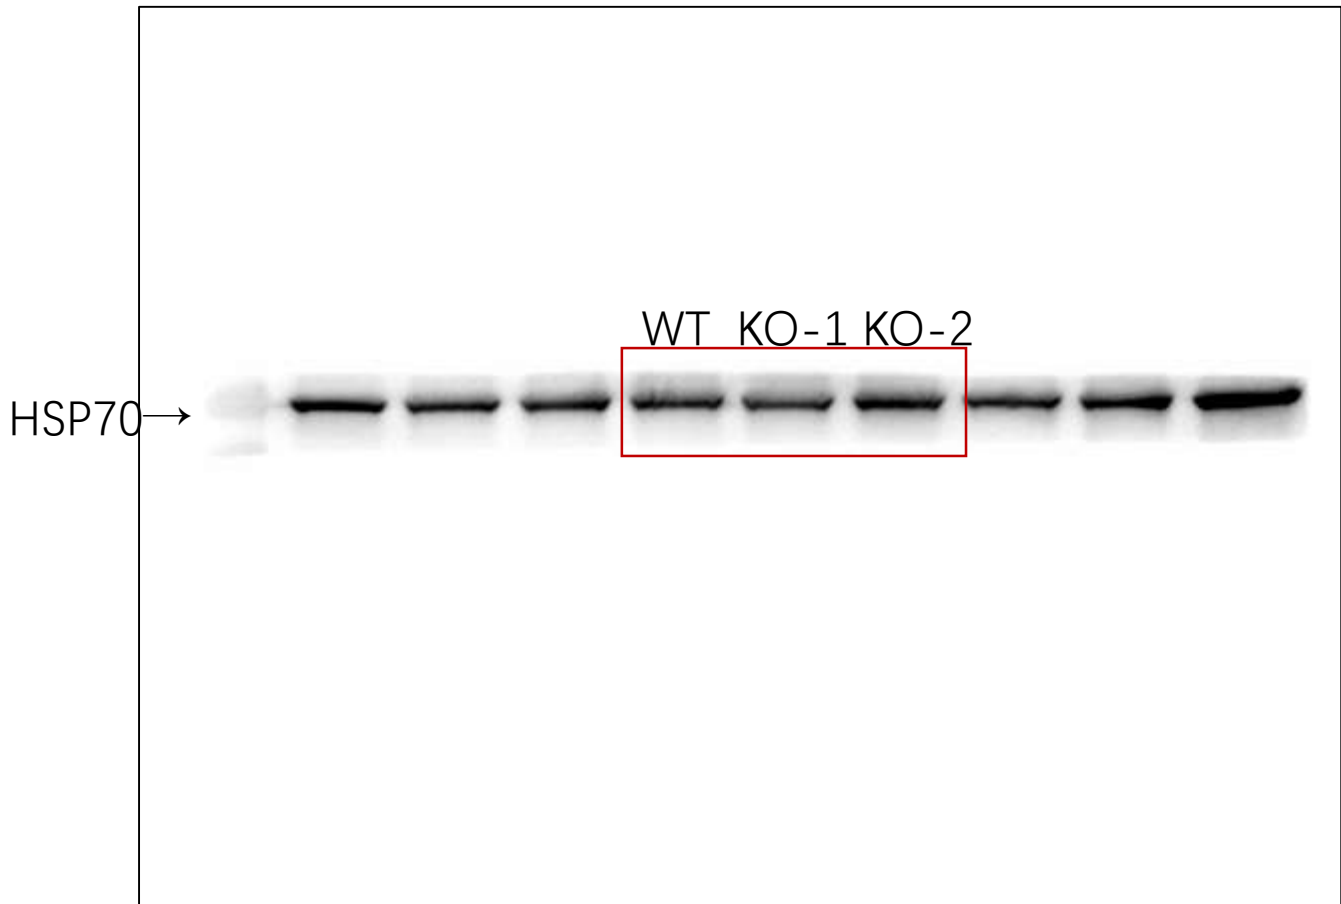

# Original images of western blots of CDH1 and FLAG in figure 5c

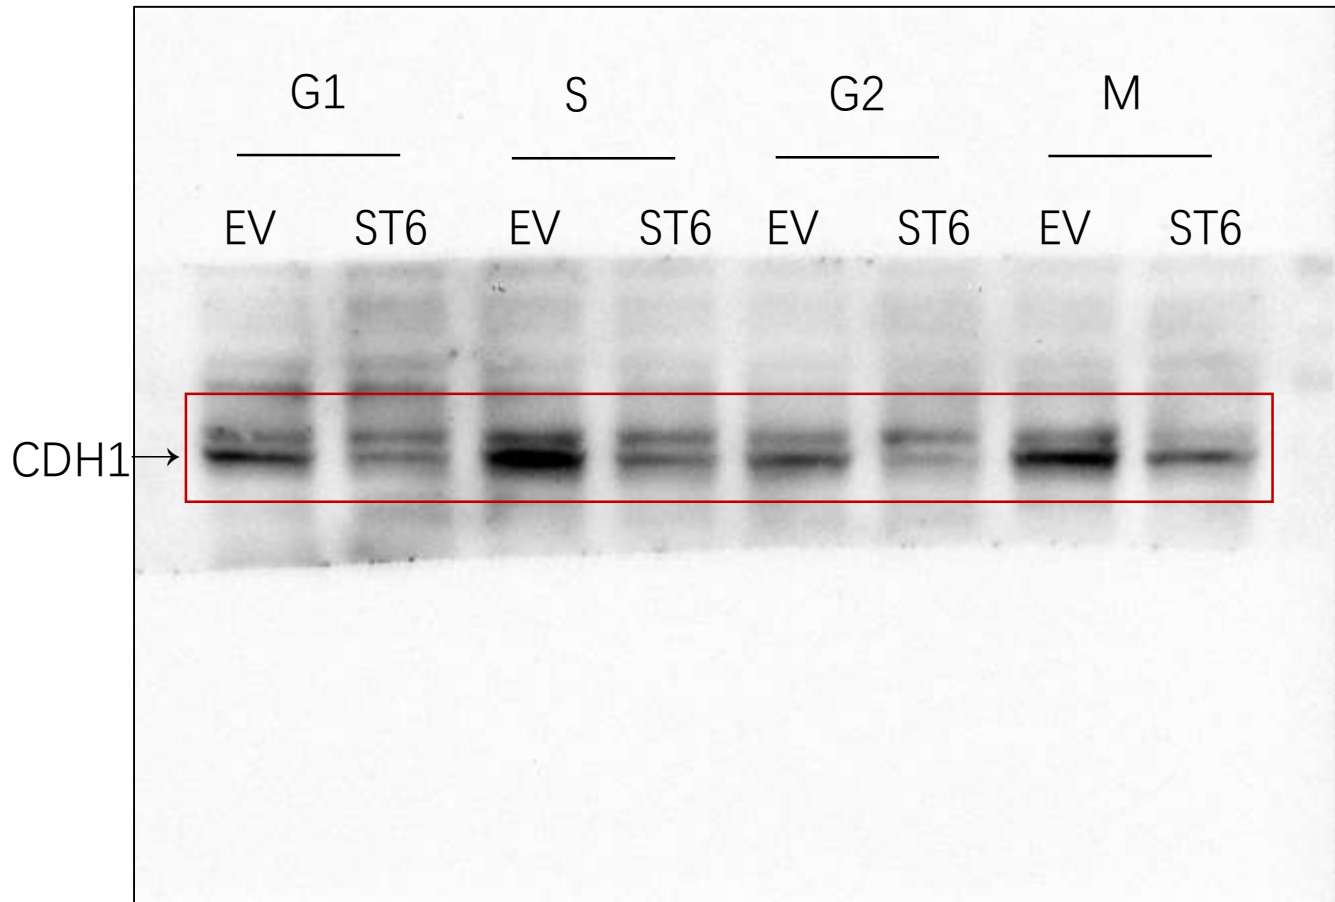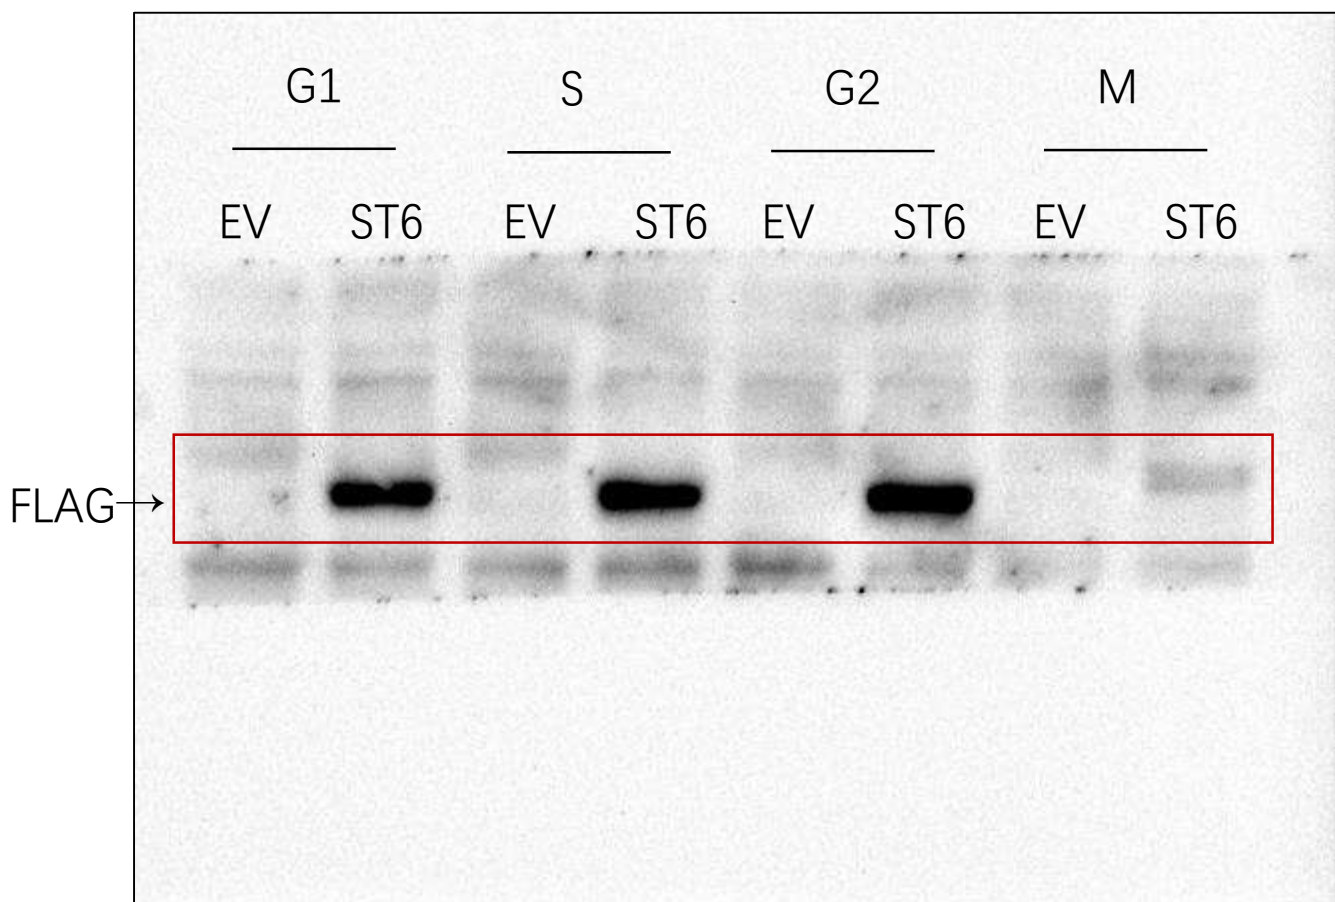

# Original images of western blots of Cyc B1 and p<sup>H3</sup>@Ser10 in figure 5c

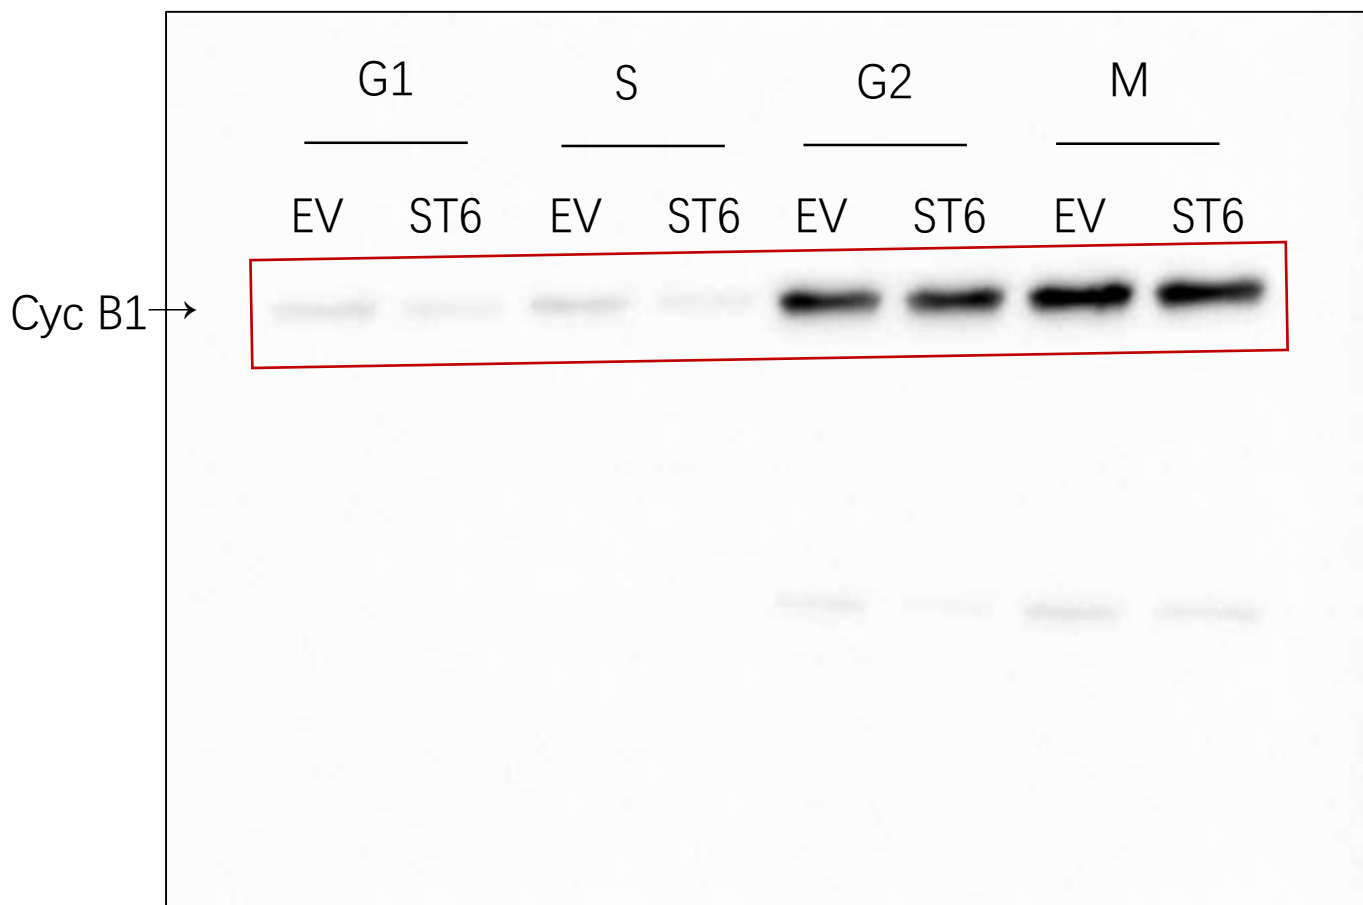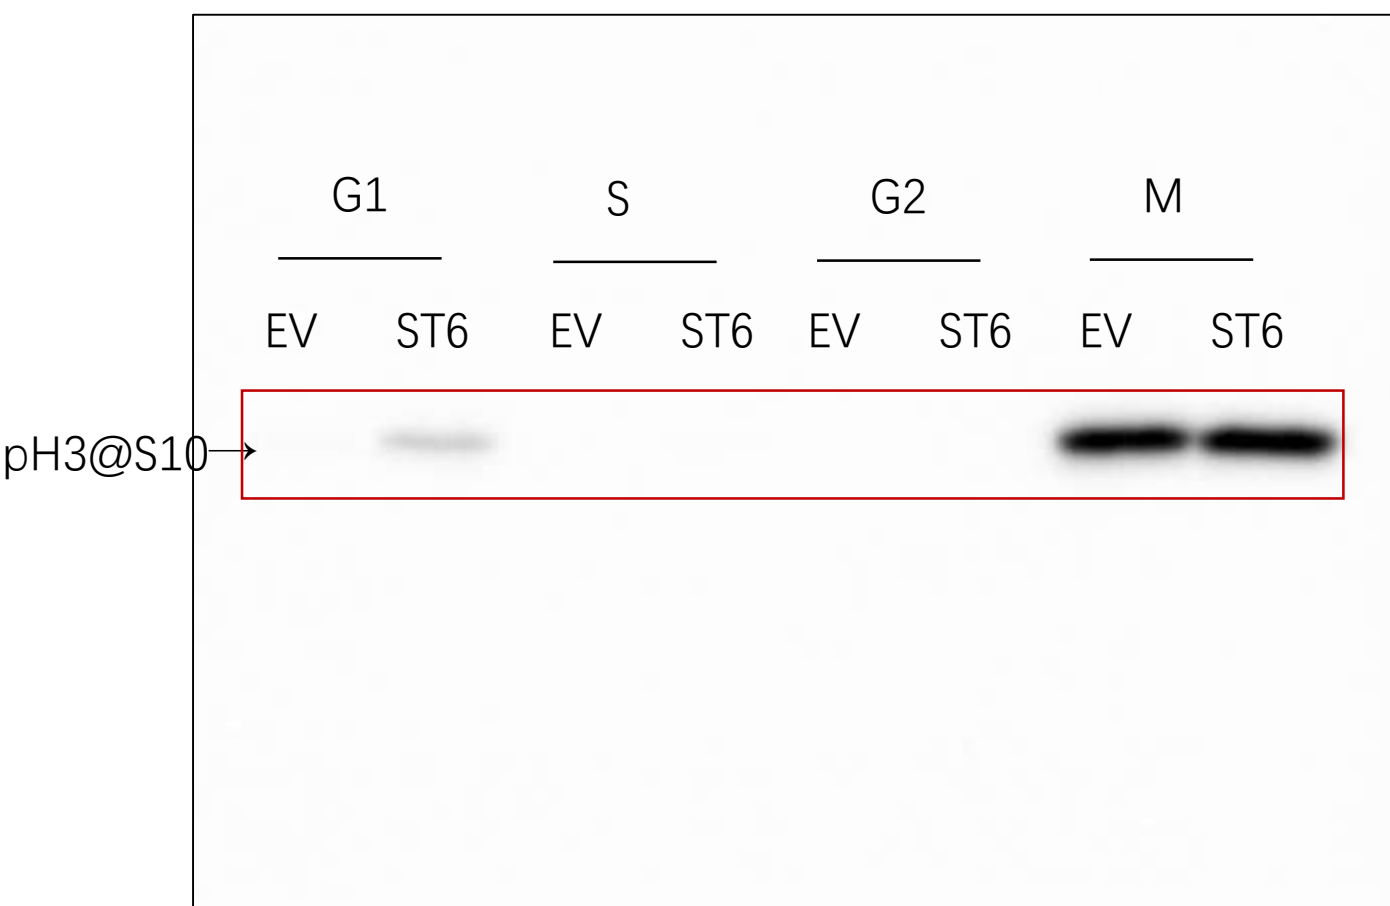

# Original images of western blots of GAPDH in figure 5c

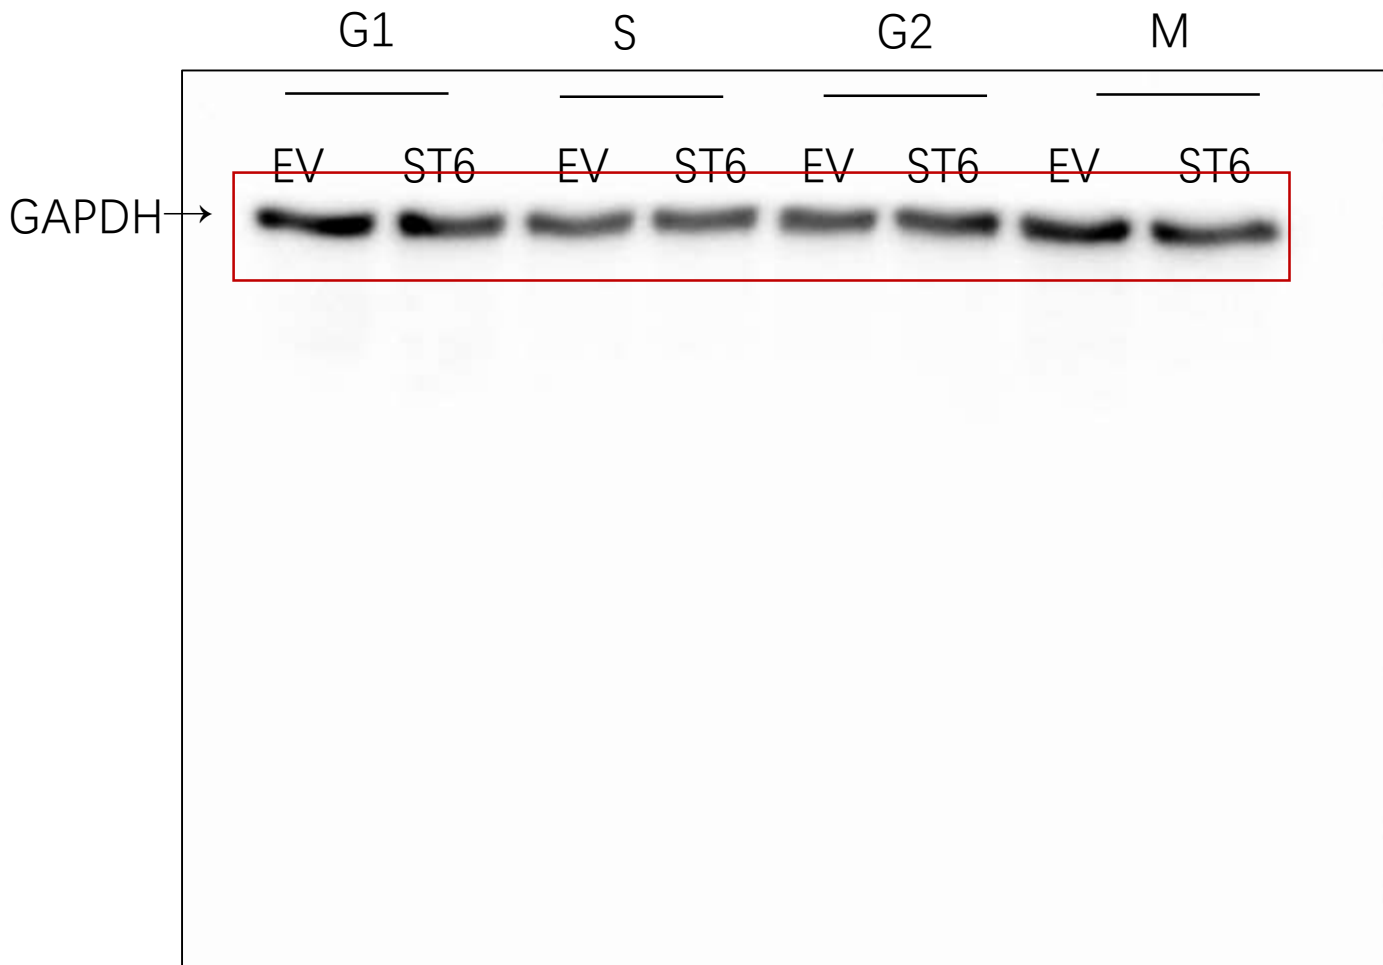

# Original images of western blots of CDH1 & actin in figure 5d EV

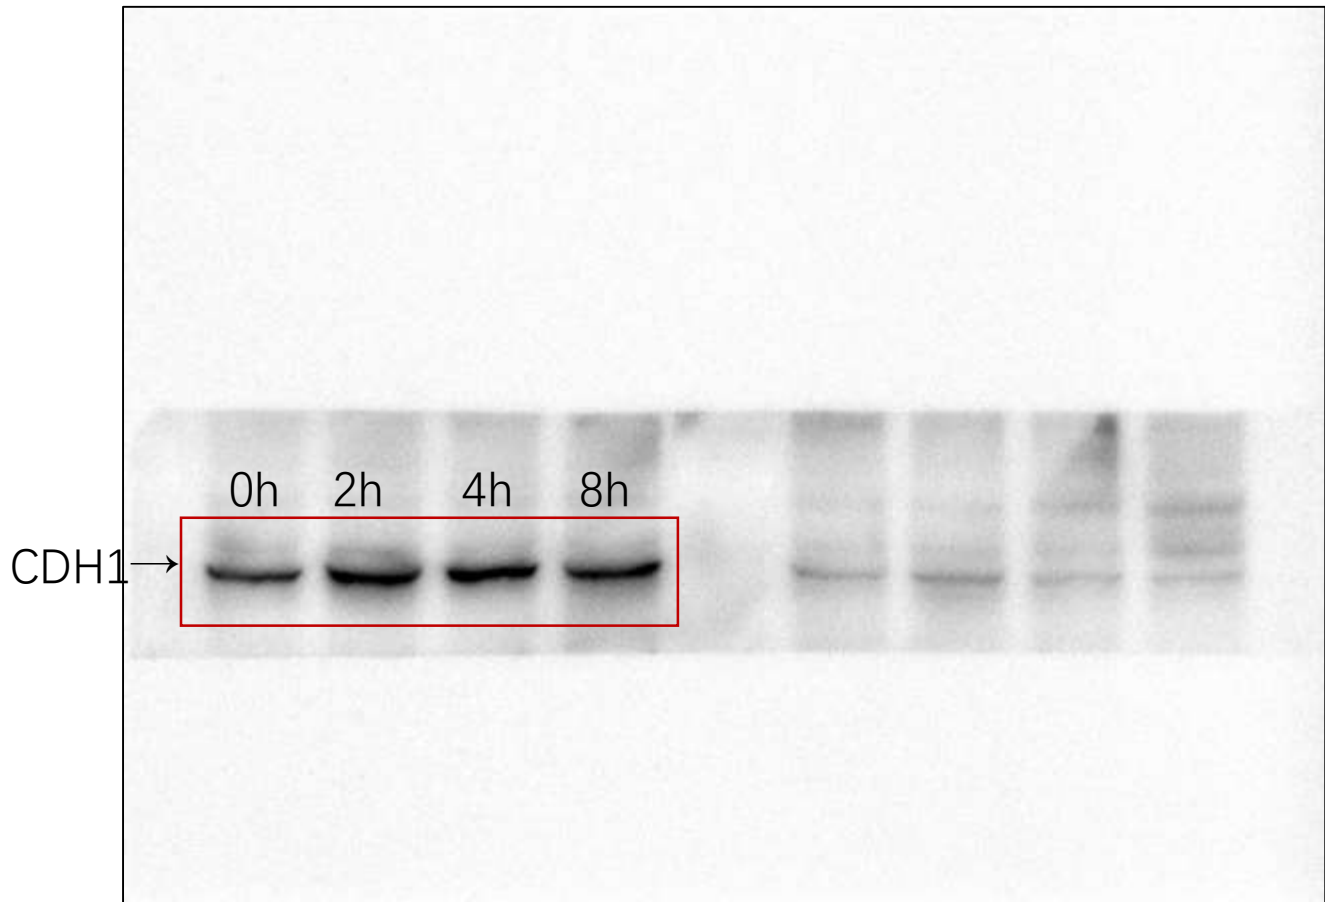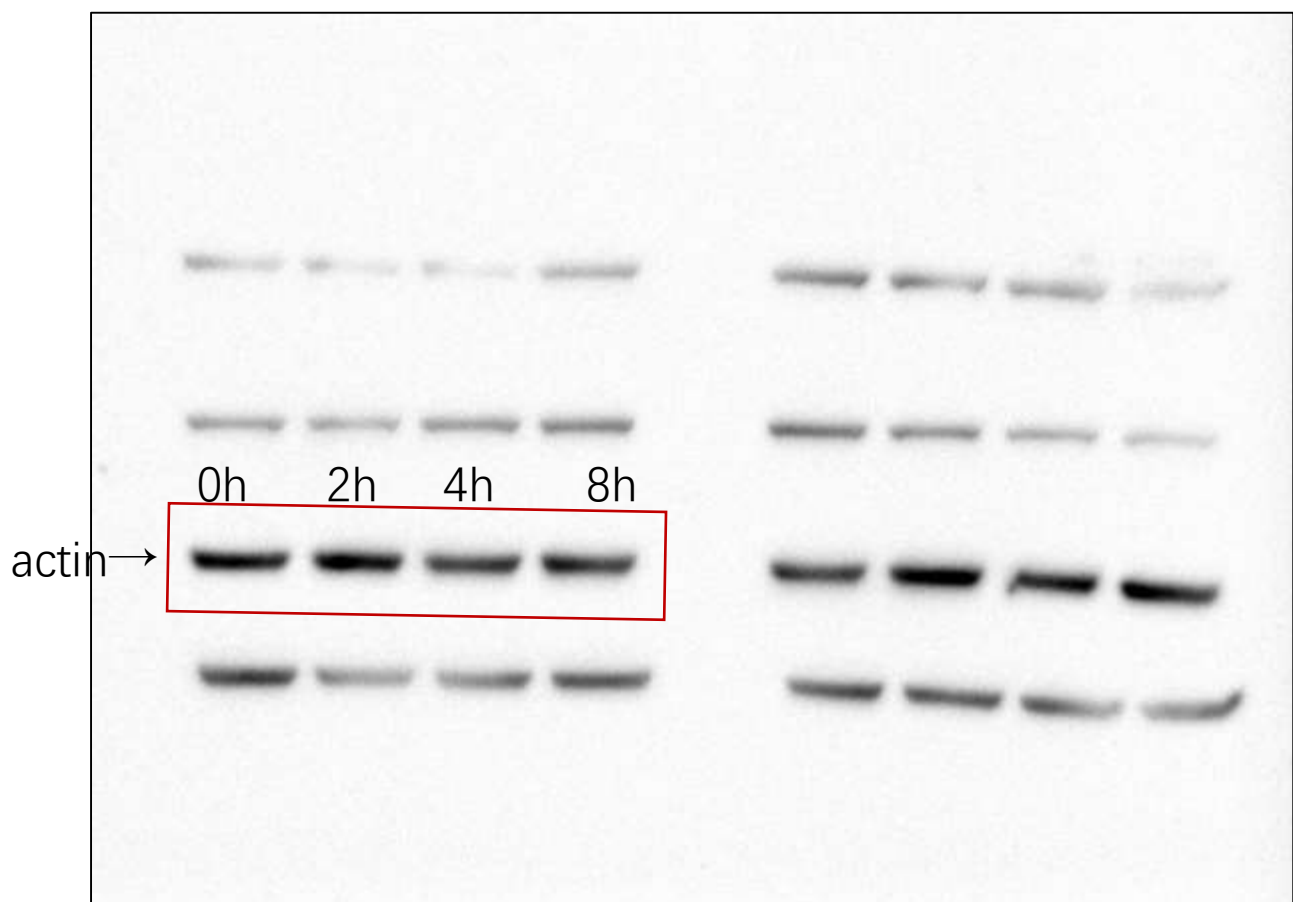

Original images of western blots of CDH1 short & long exposures in figure 5d ST6

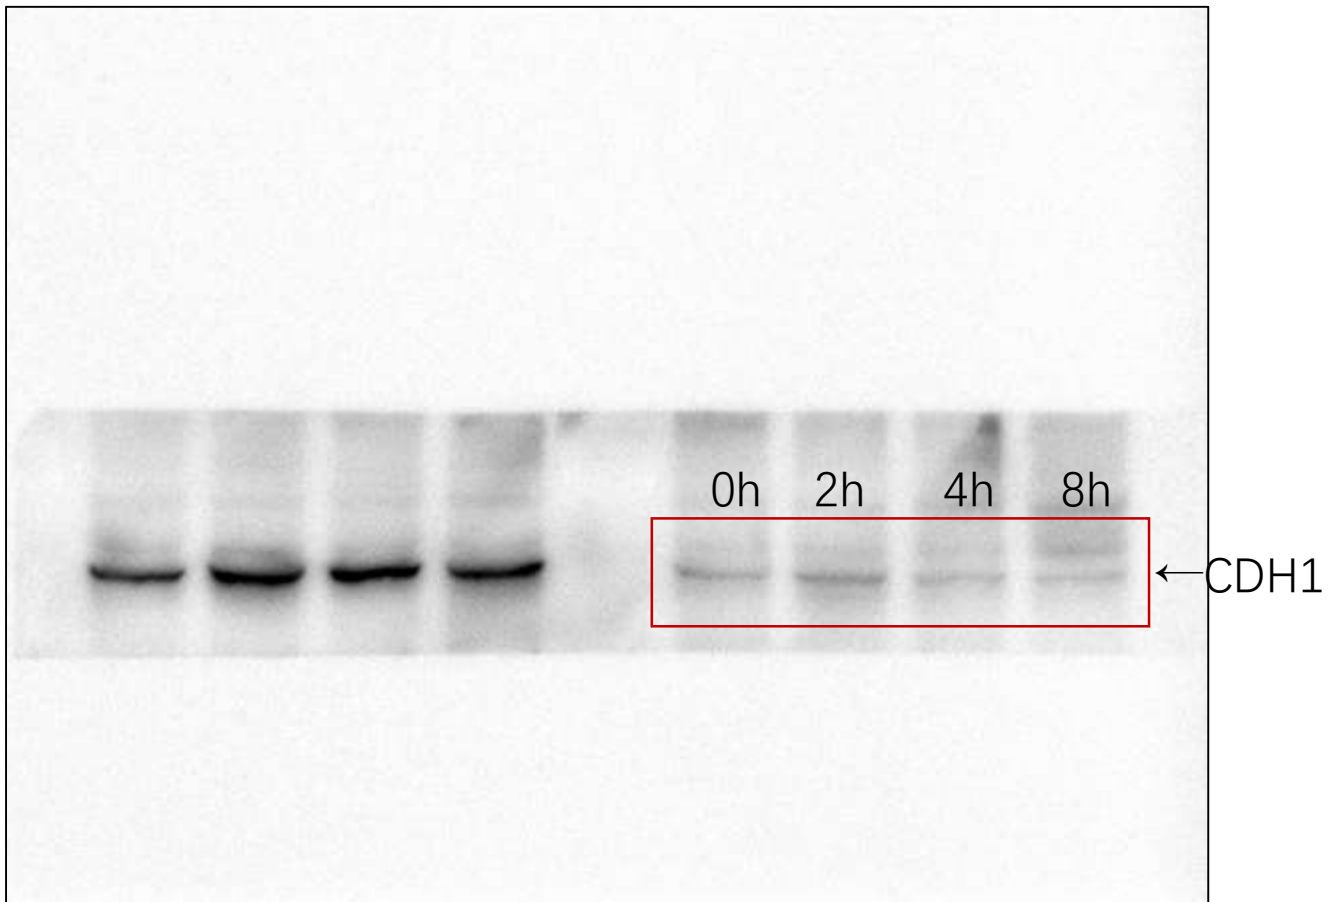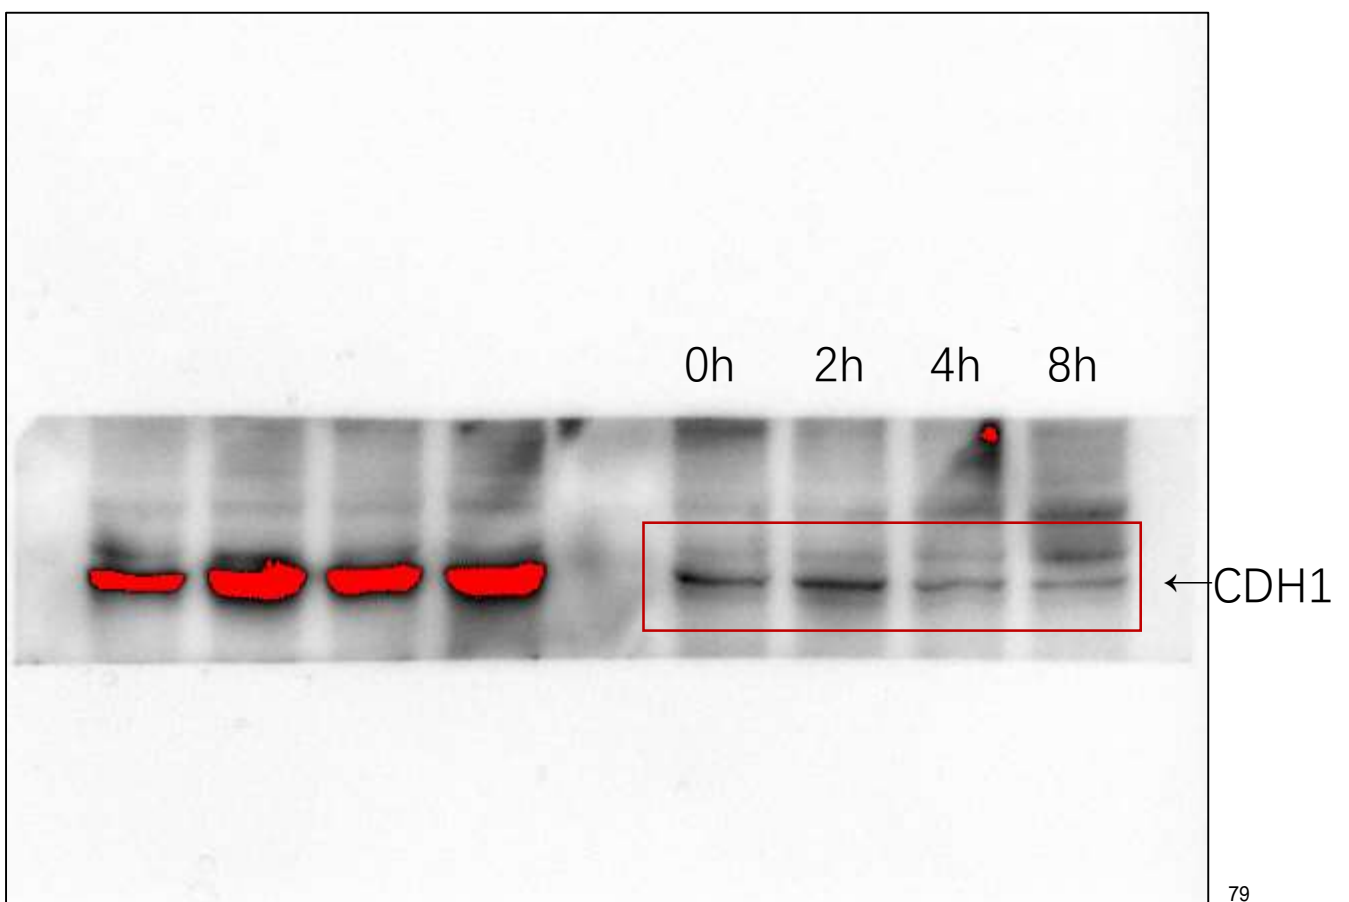

Original images of western blots of actin in figure 5d ST6

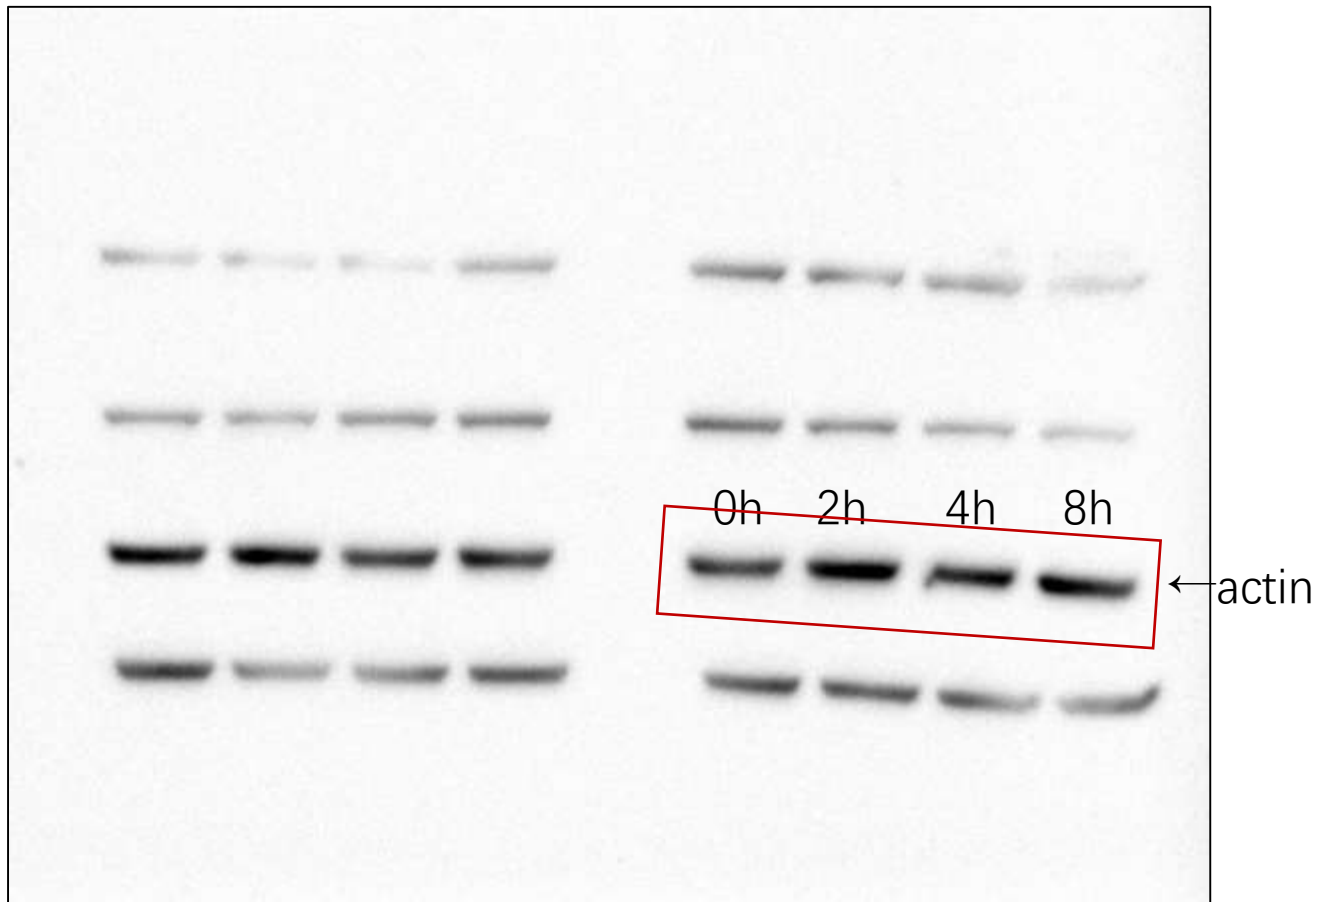



# Original images of western blots of CDH1-HA and FLAG in figure 5g

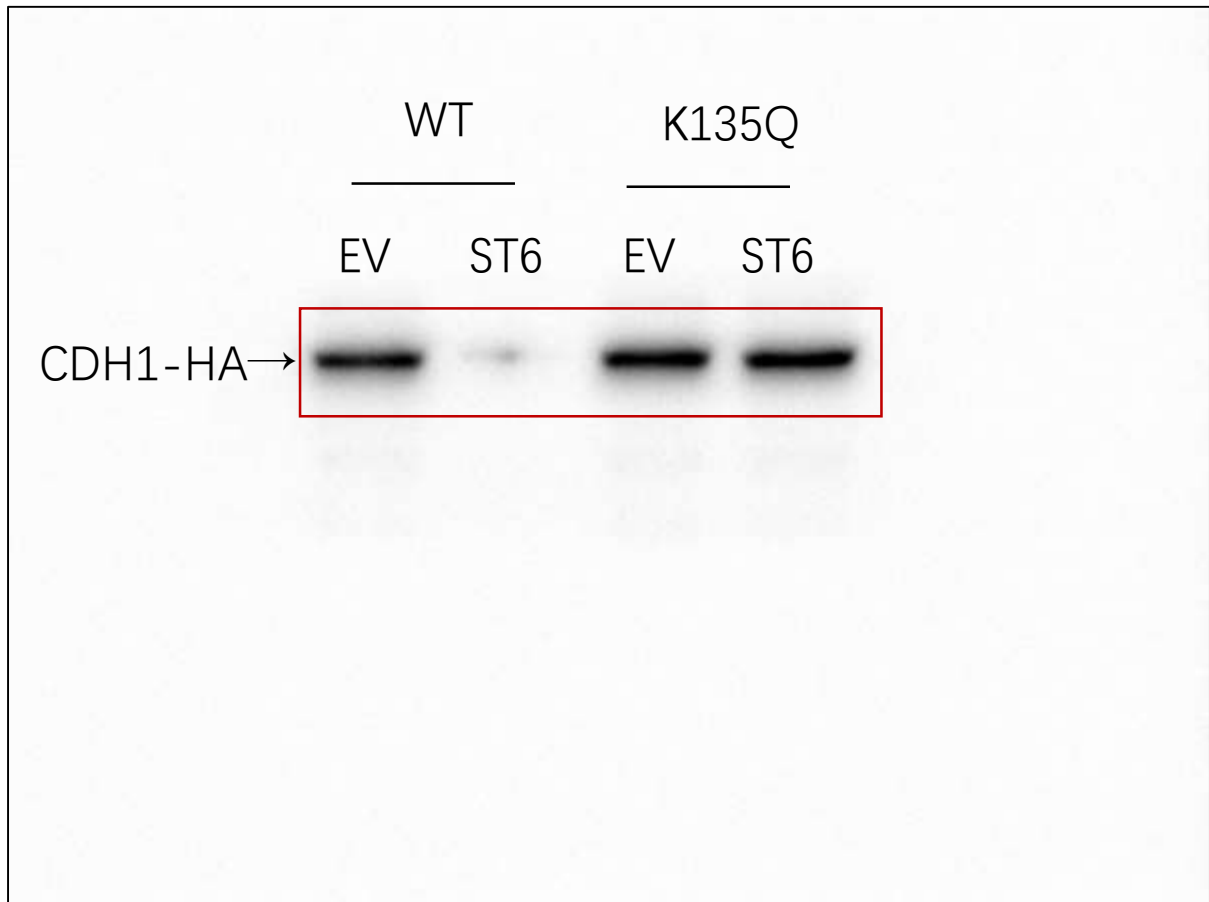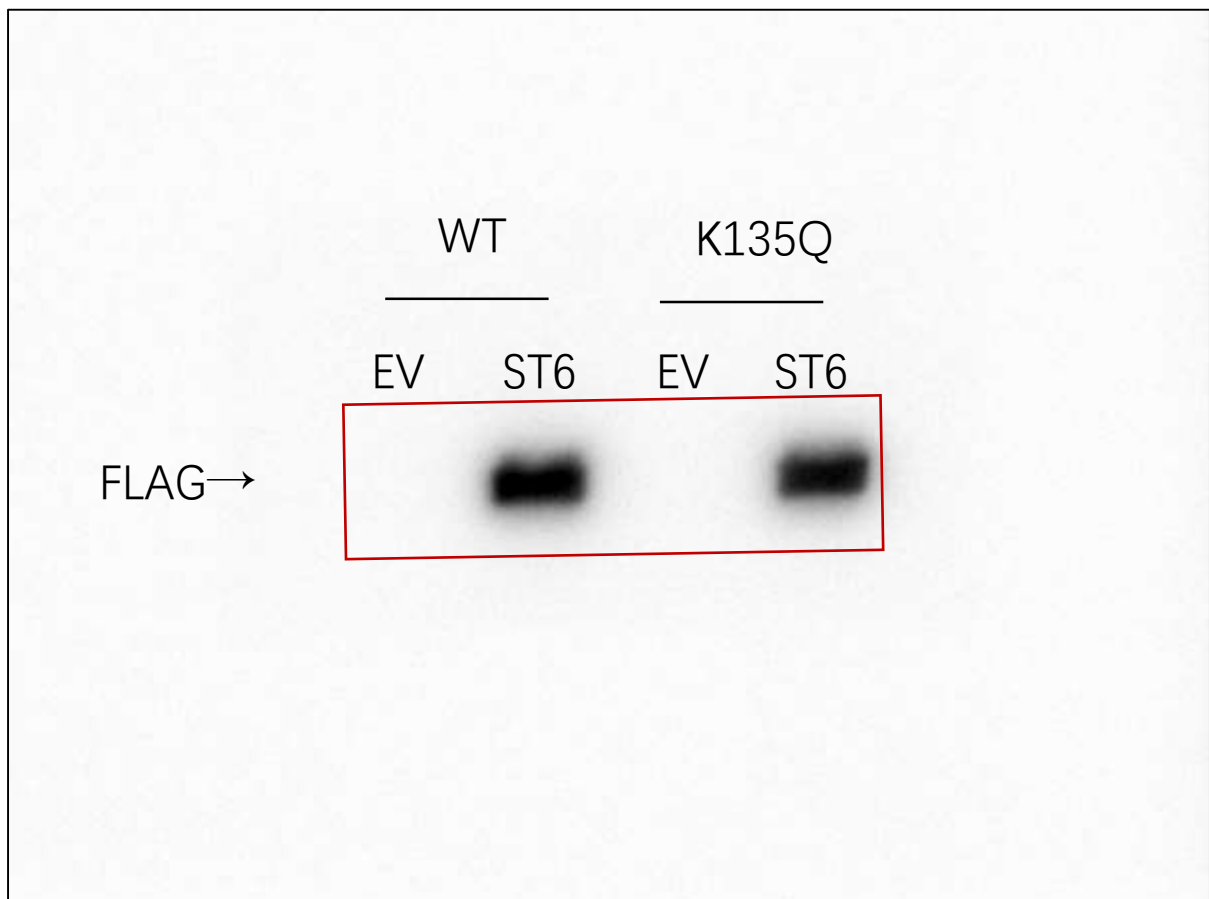

Original images of western blots of actin in figure 5g

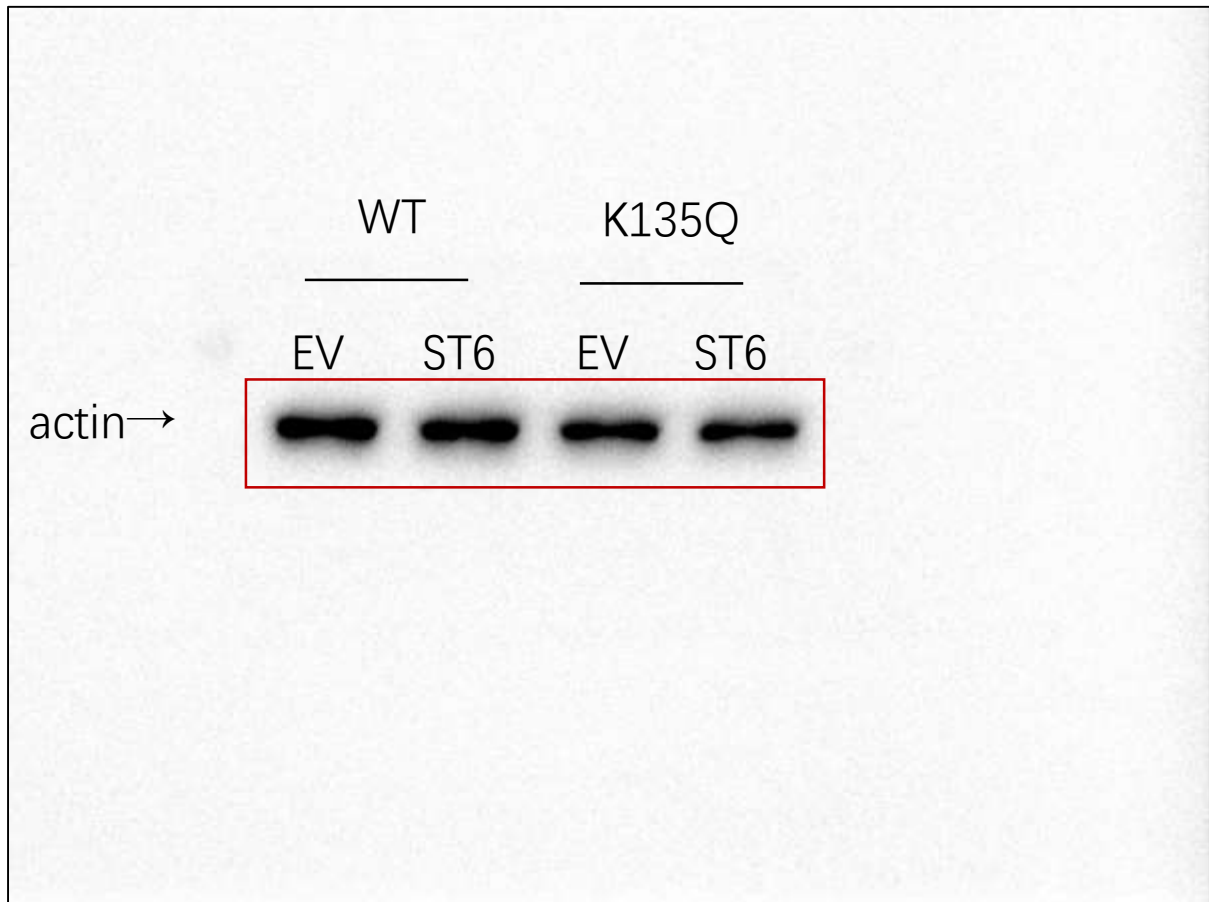

# Original images of western blots of TPX2 & Cyc B1 in figure 6a 293T

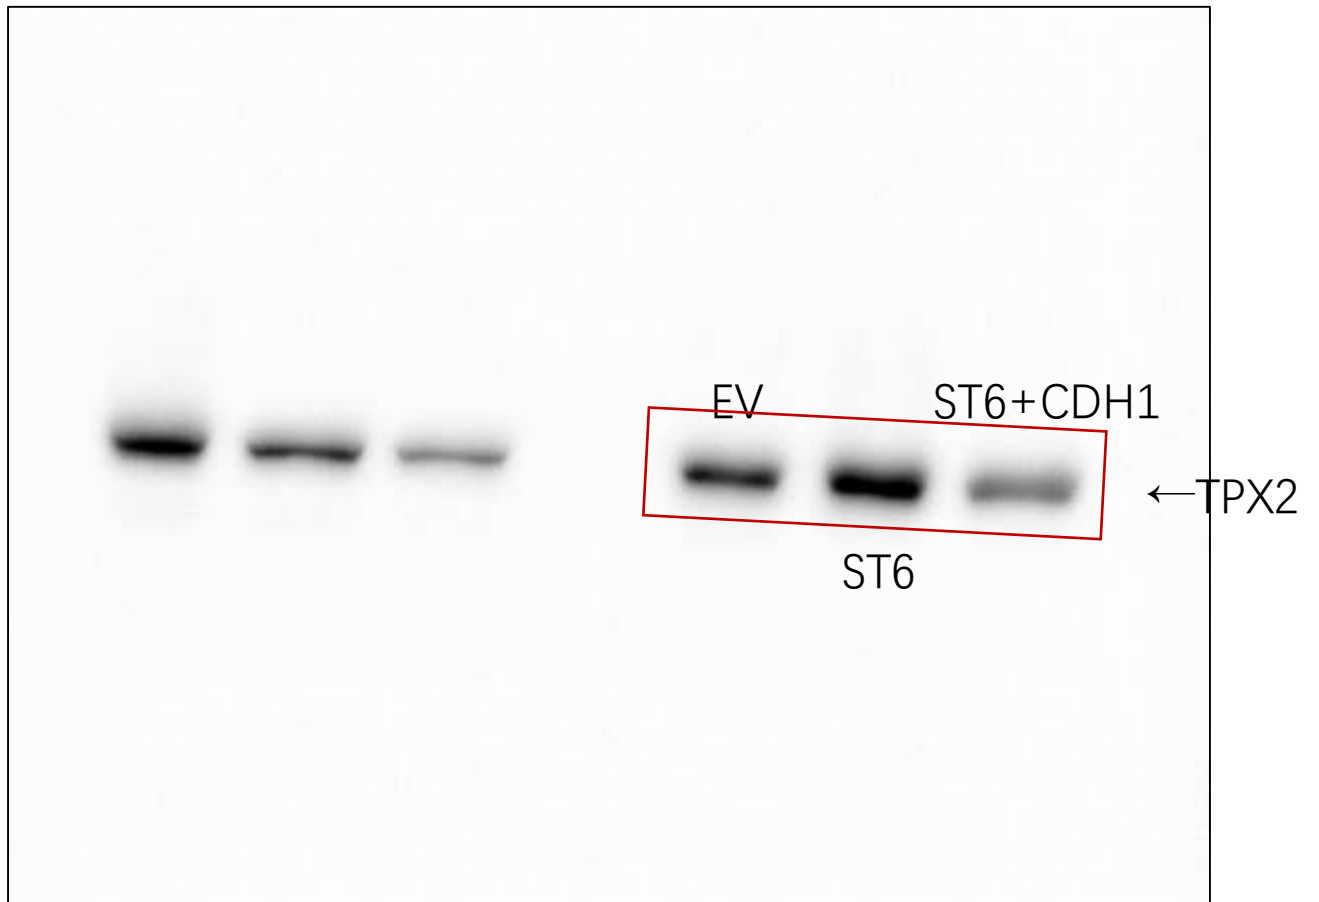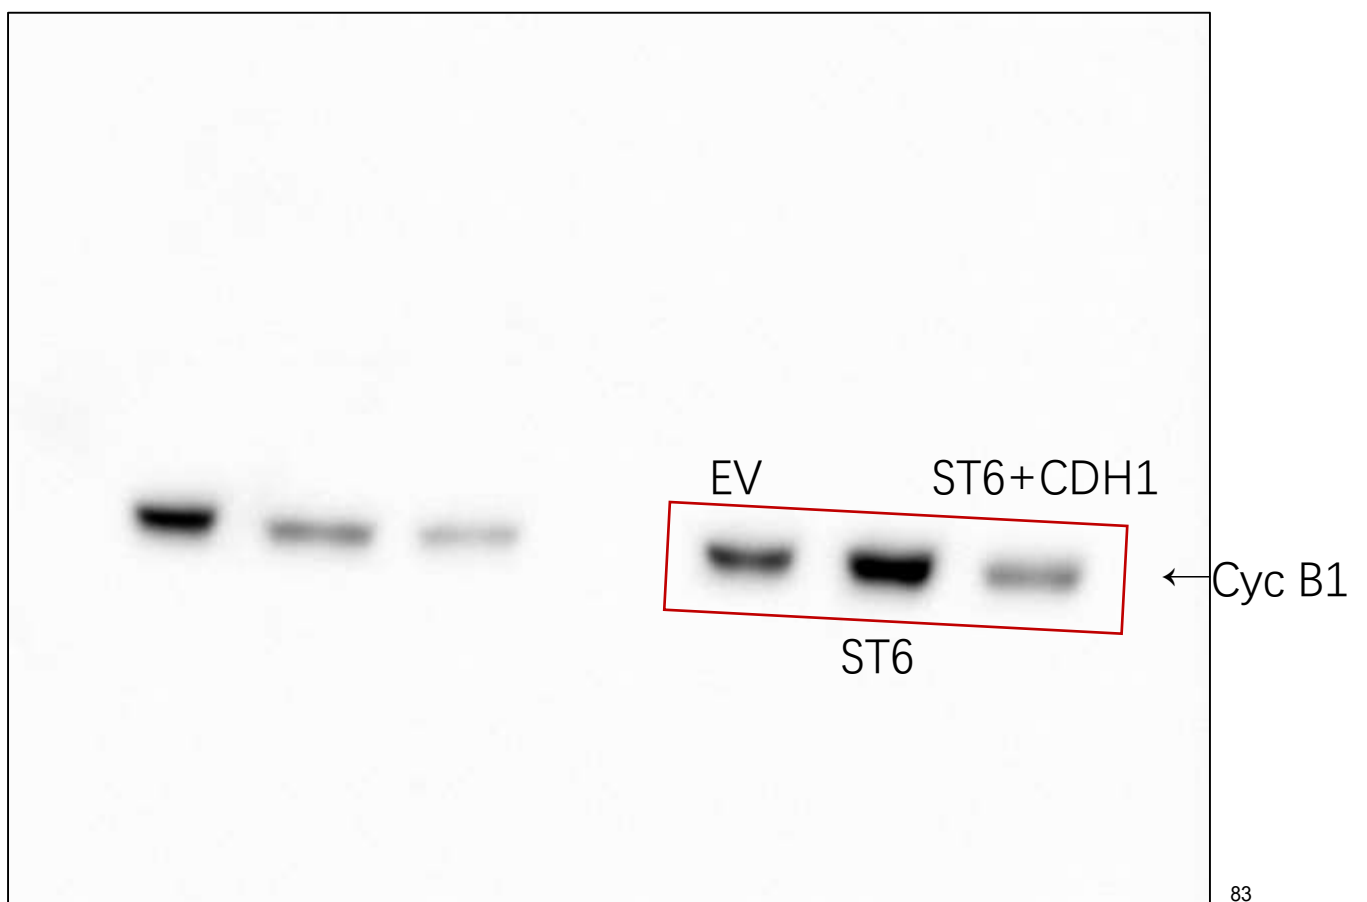

# Original images of western blots of AURKA & AURKB in figure 6a 293T

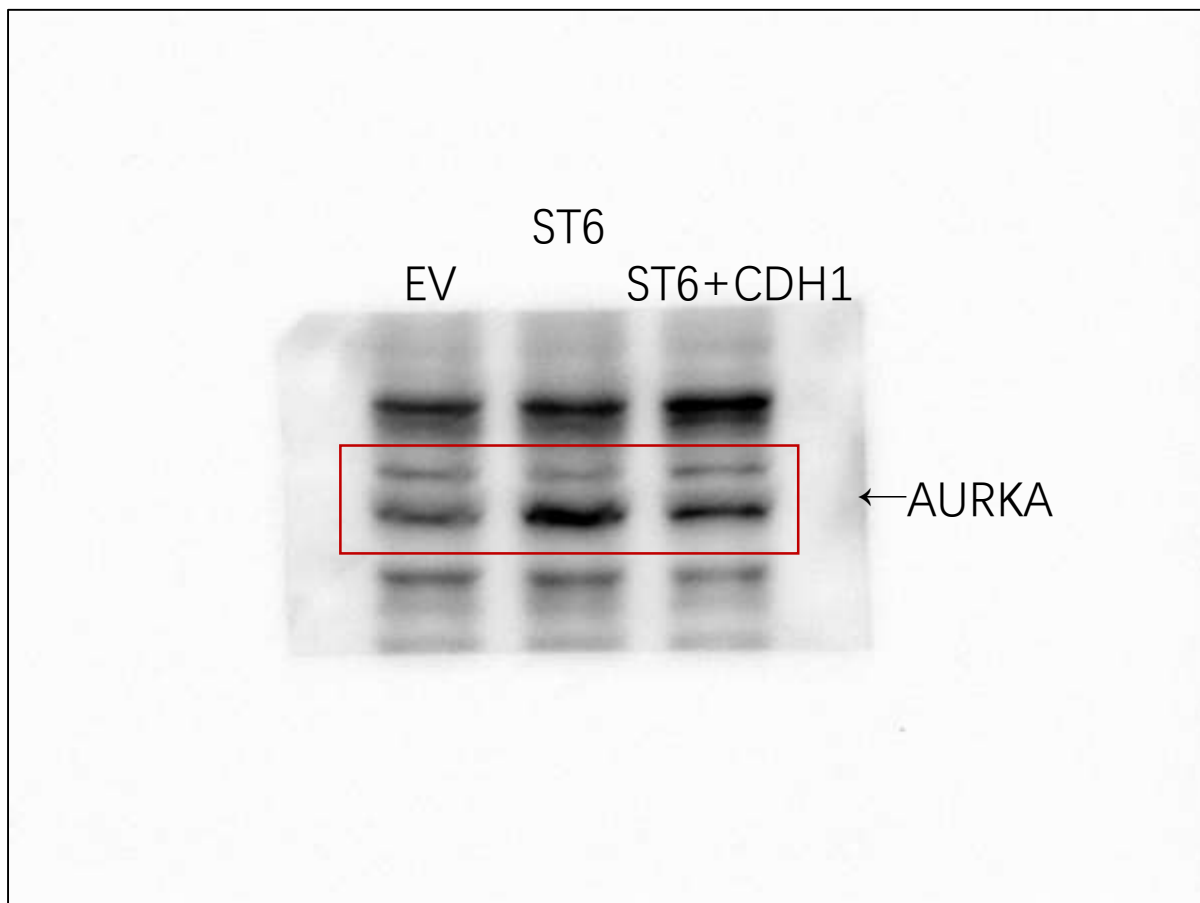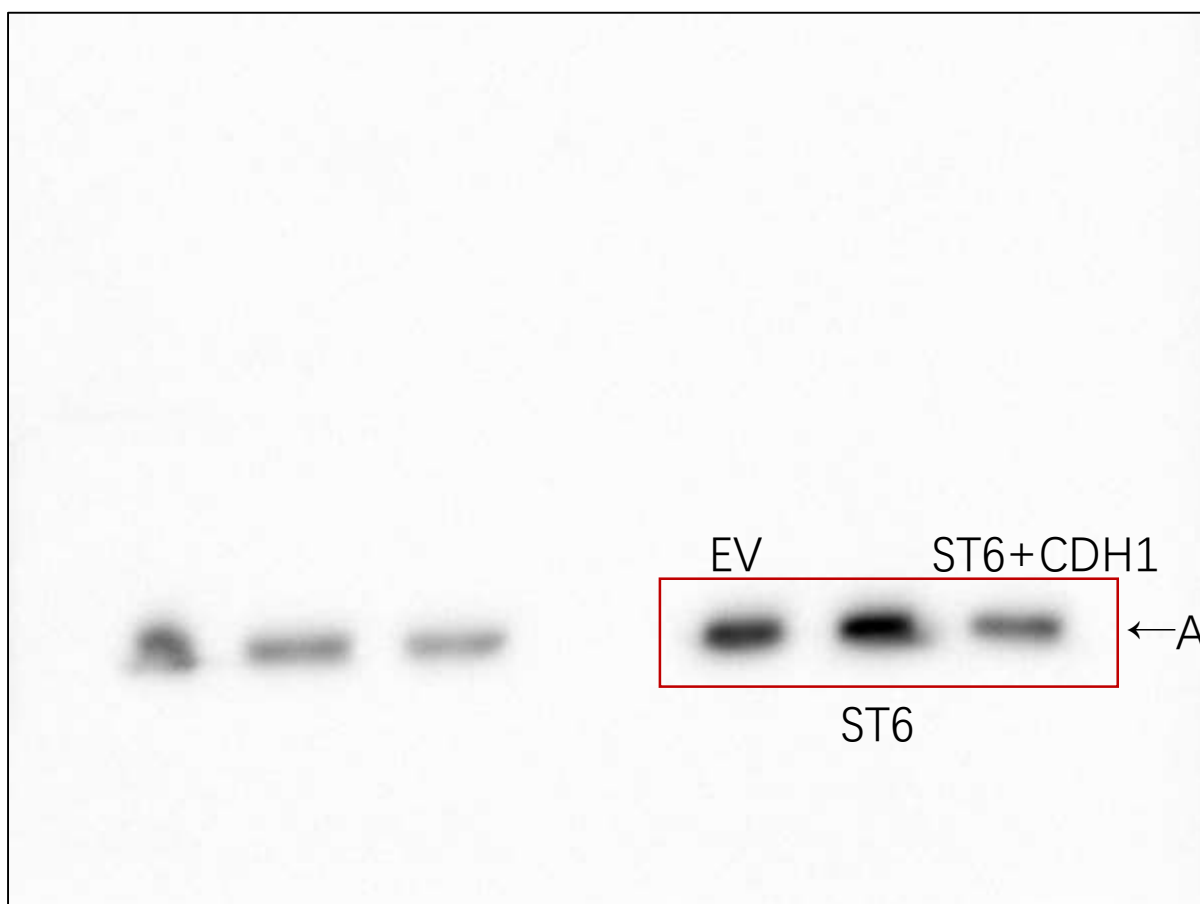

# Original images of western blots of securin & FLAG in figure 6a 293T

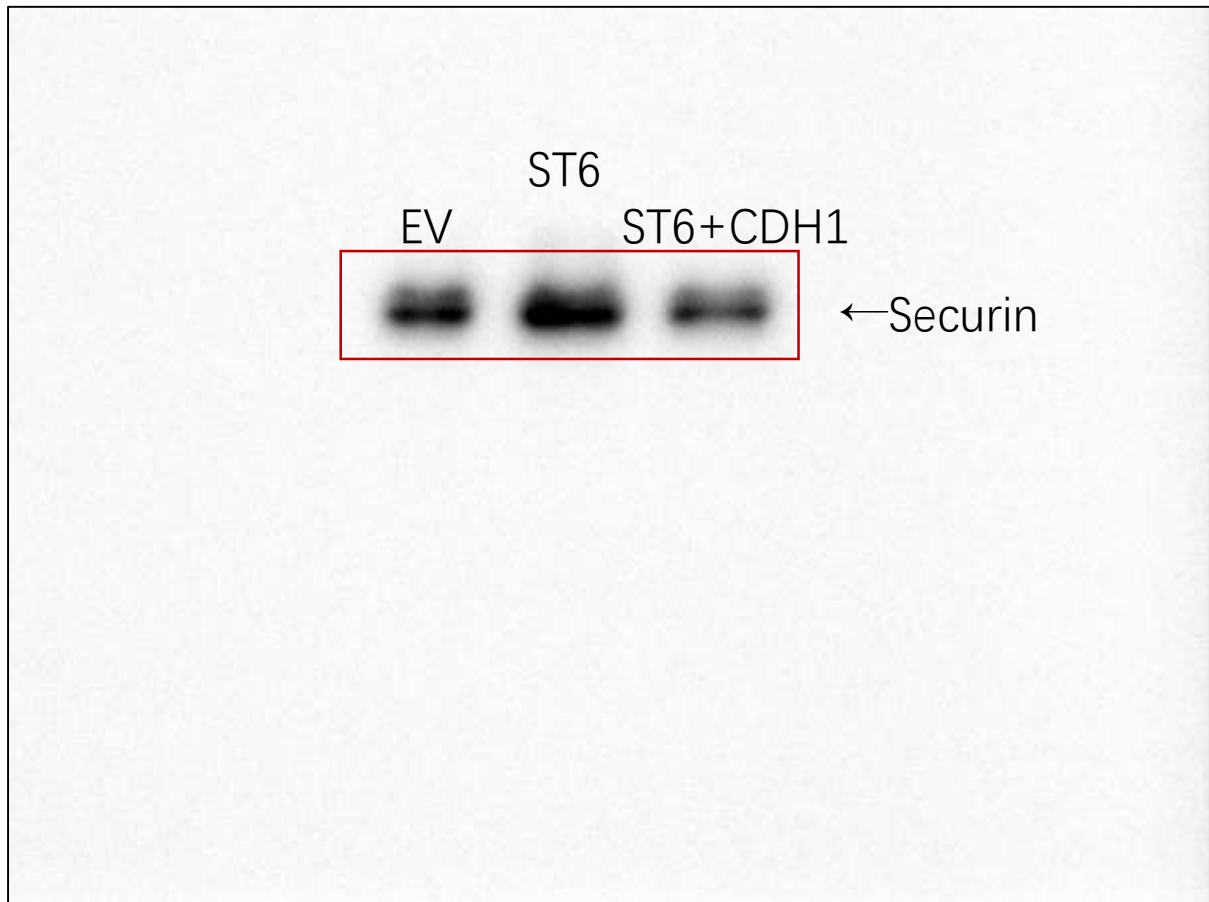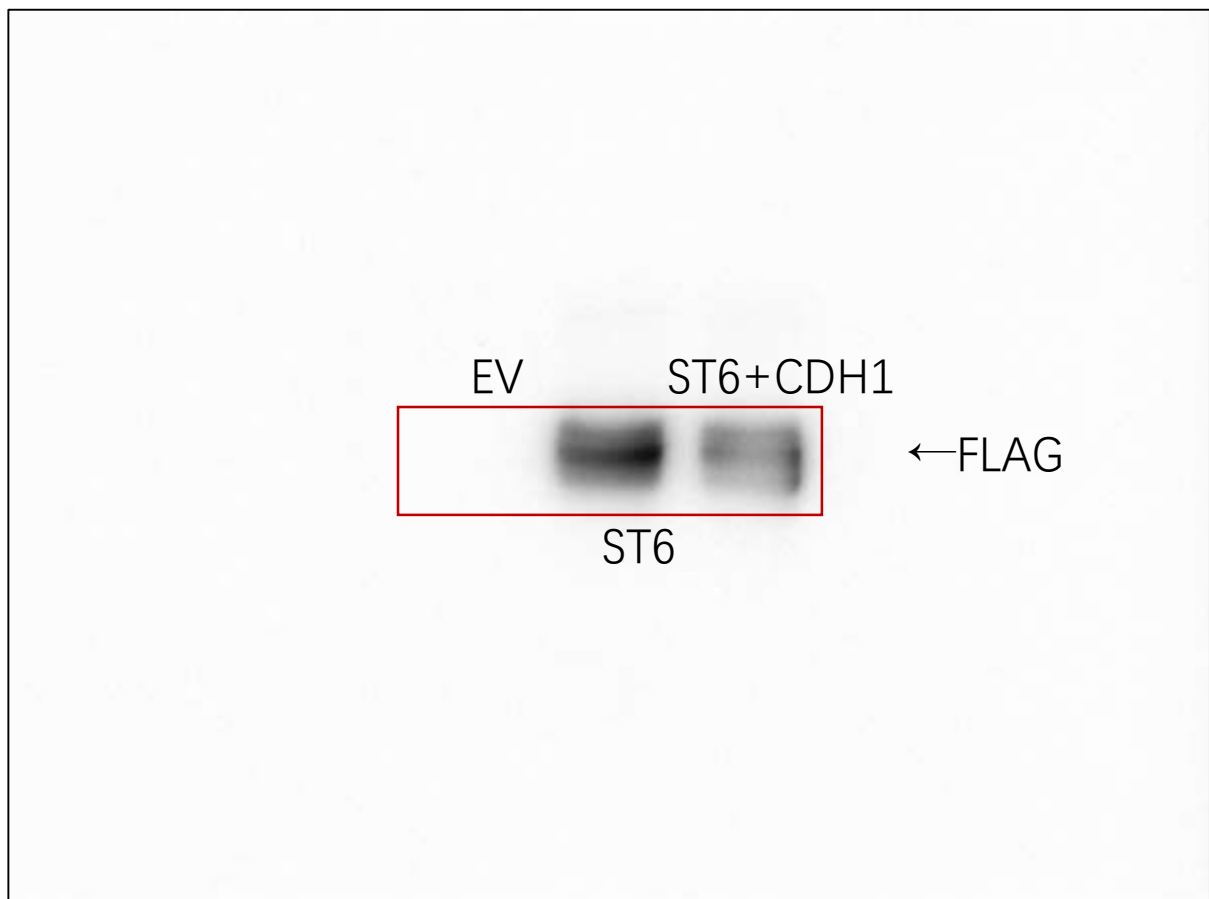

# Original images of western blots of CDH1 & actin in figure 6a 293T

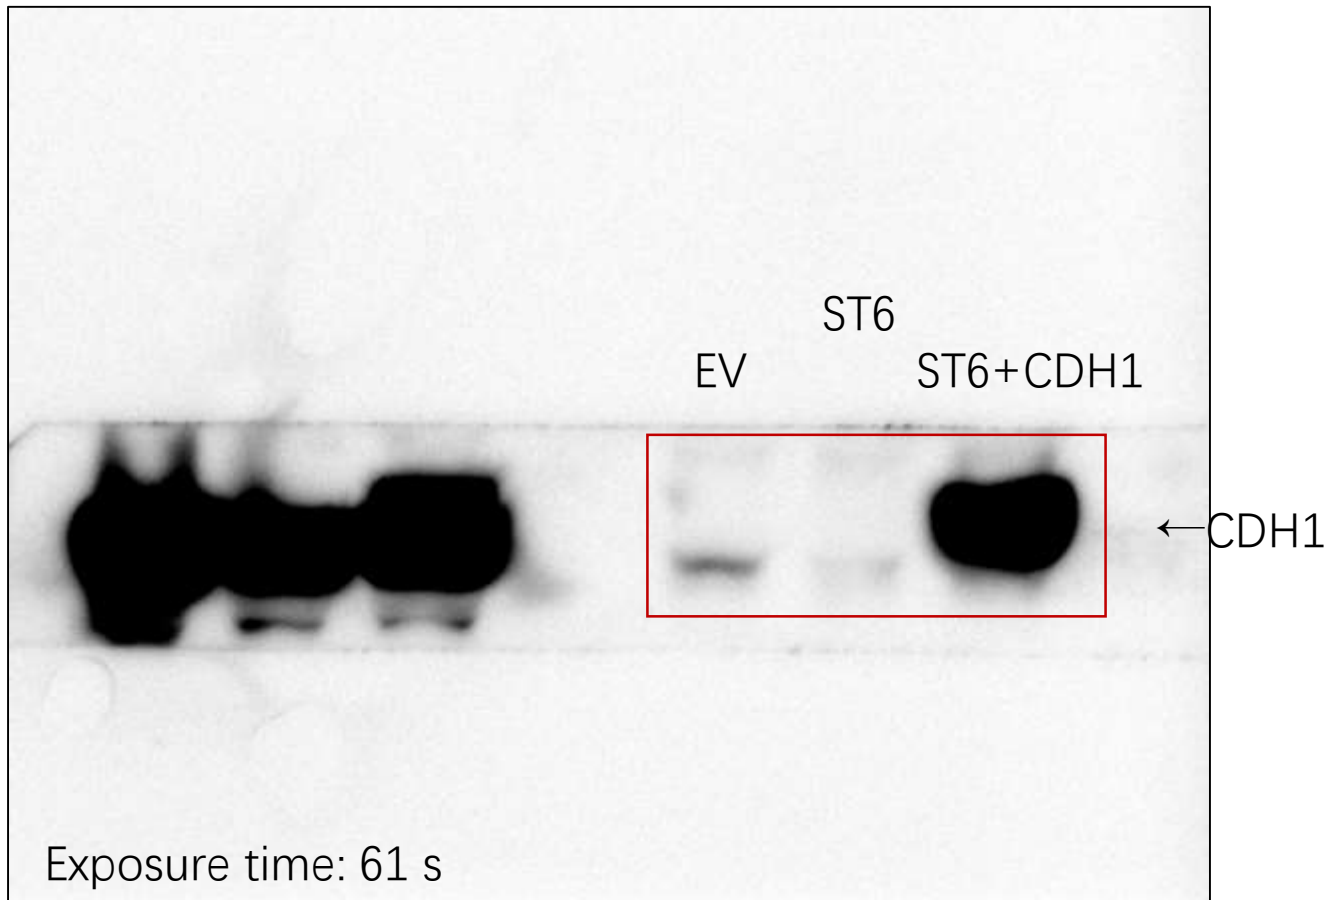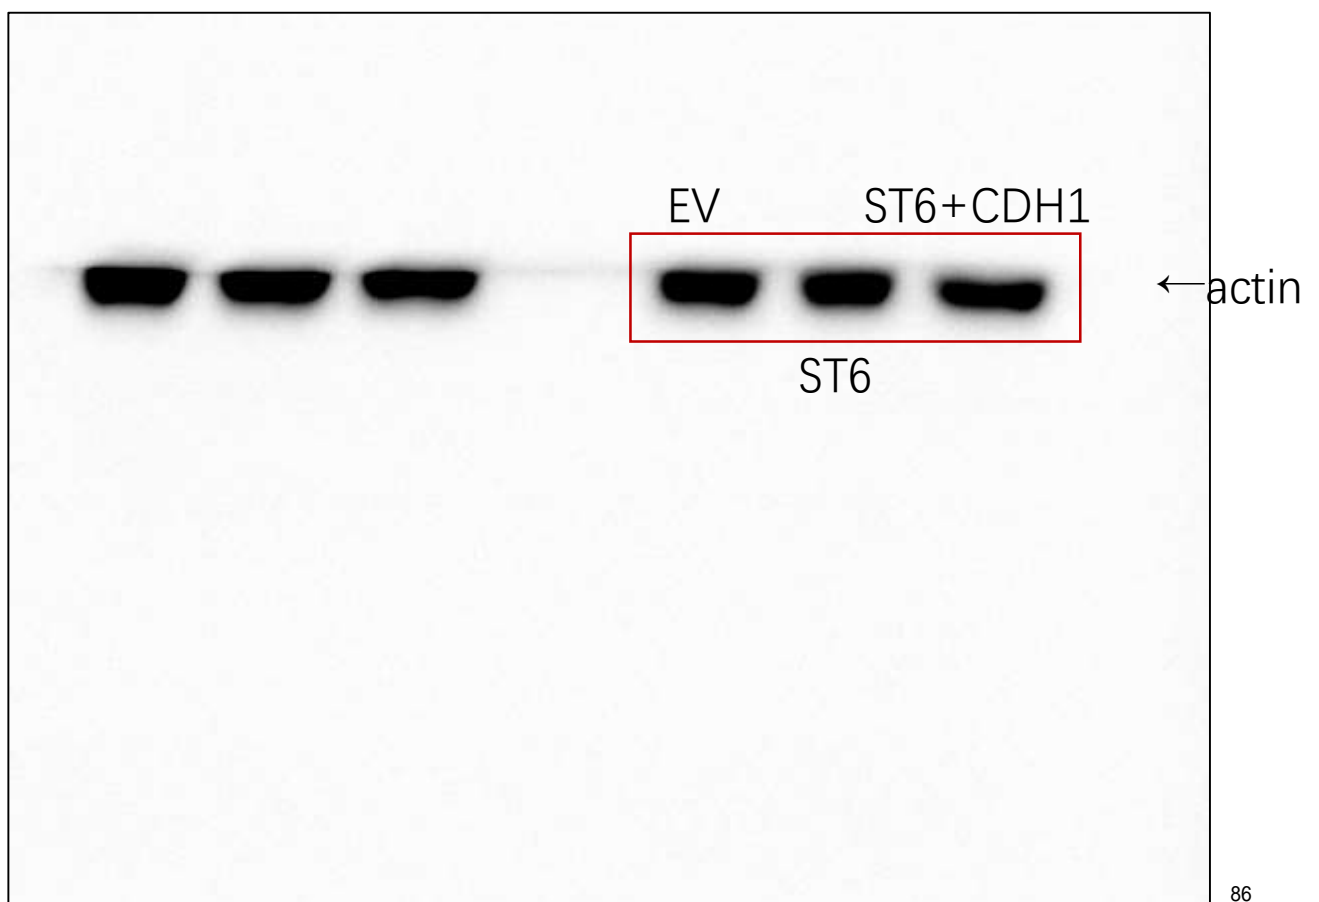

Original images of western blots of CDH1 in figure 6a 293T with short exposure time

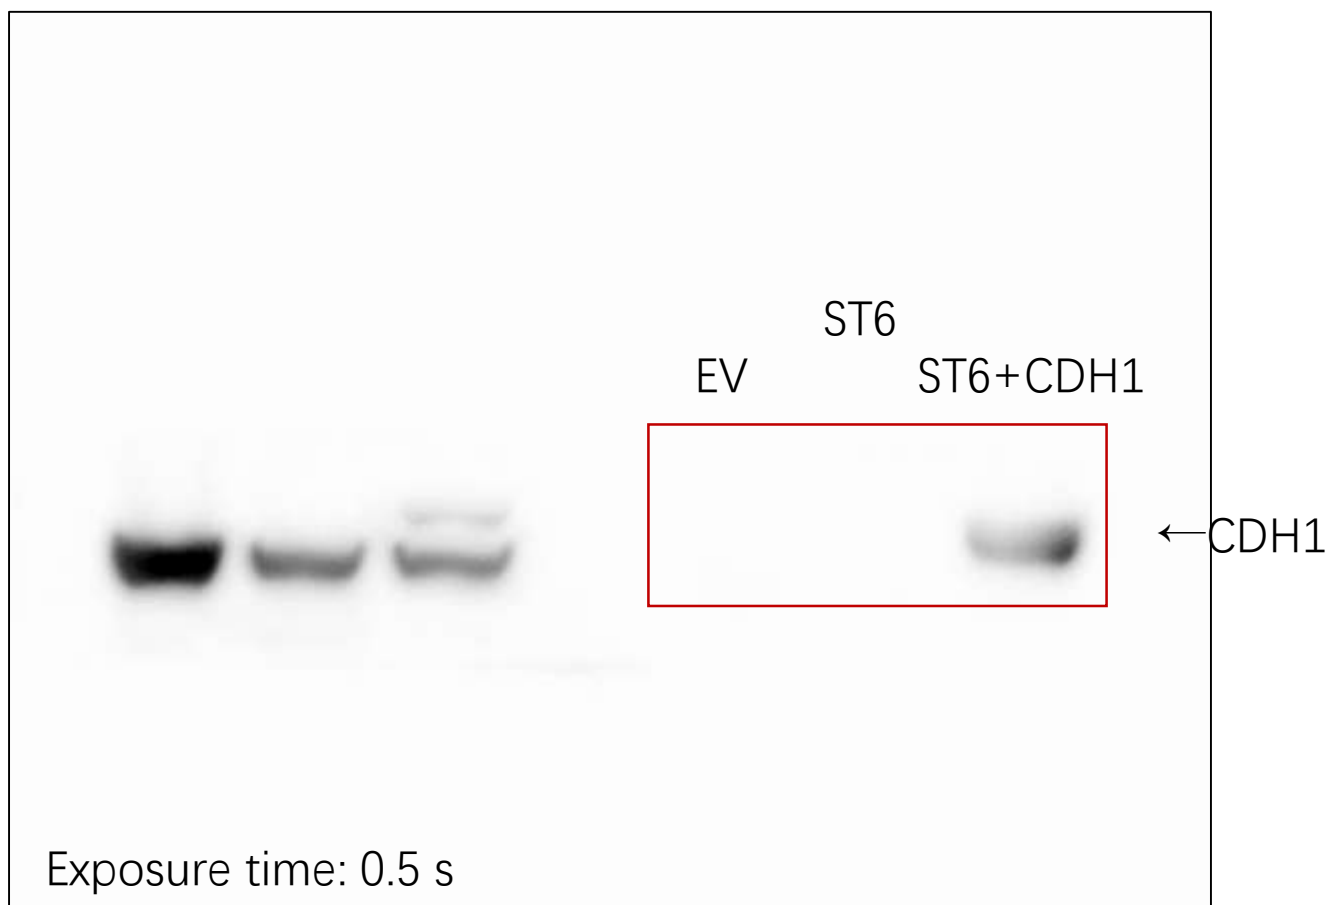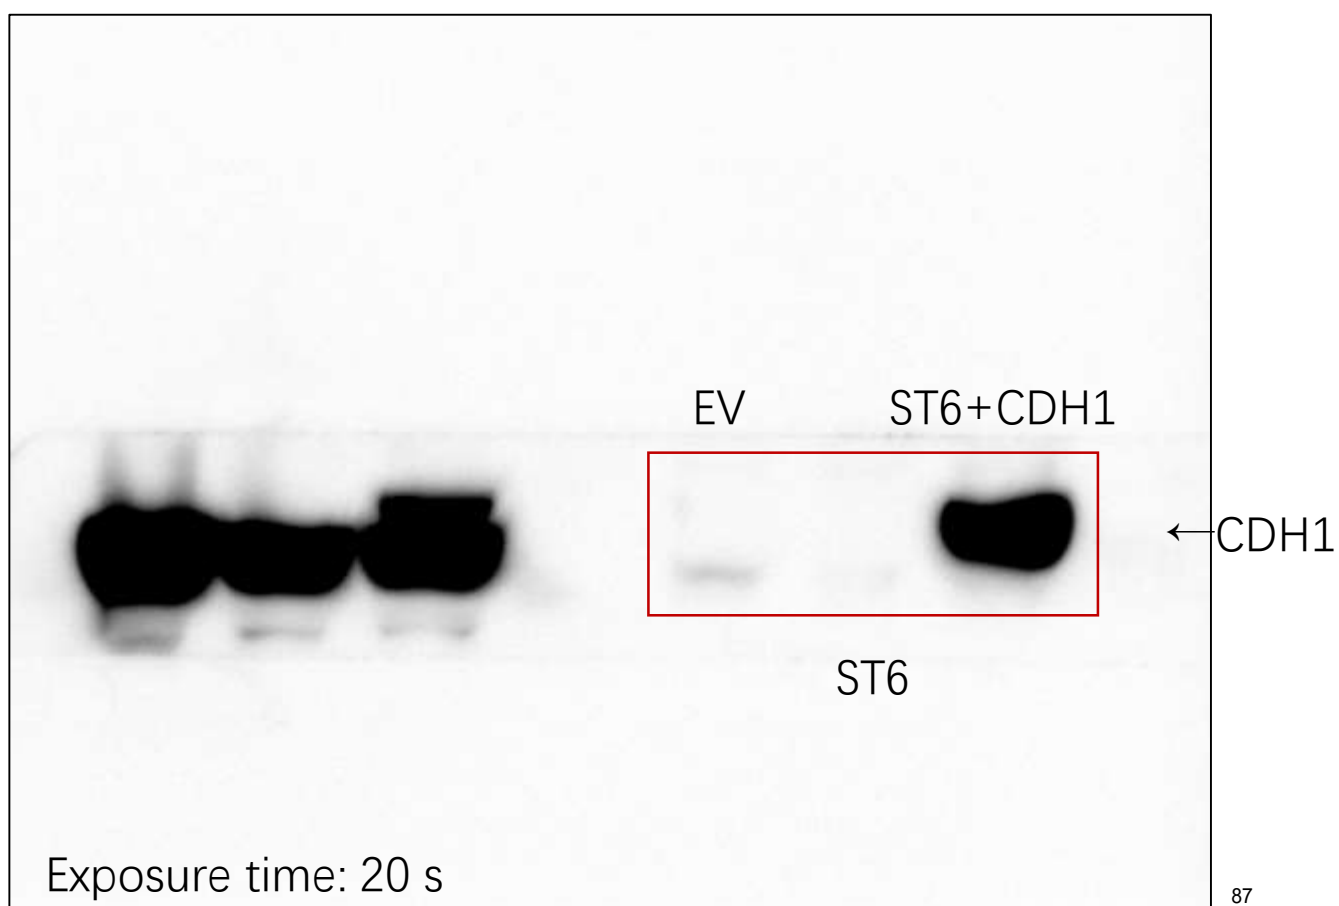

# Original images of western blots of TPX2 & Cyc B1 in figure 6a HeLa

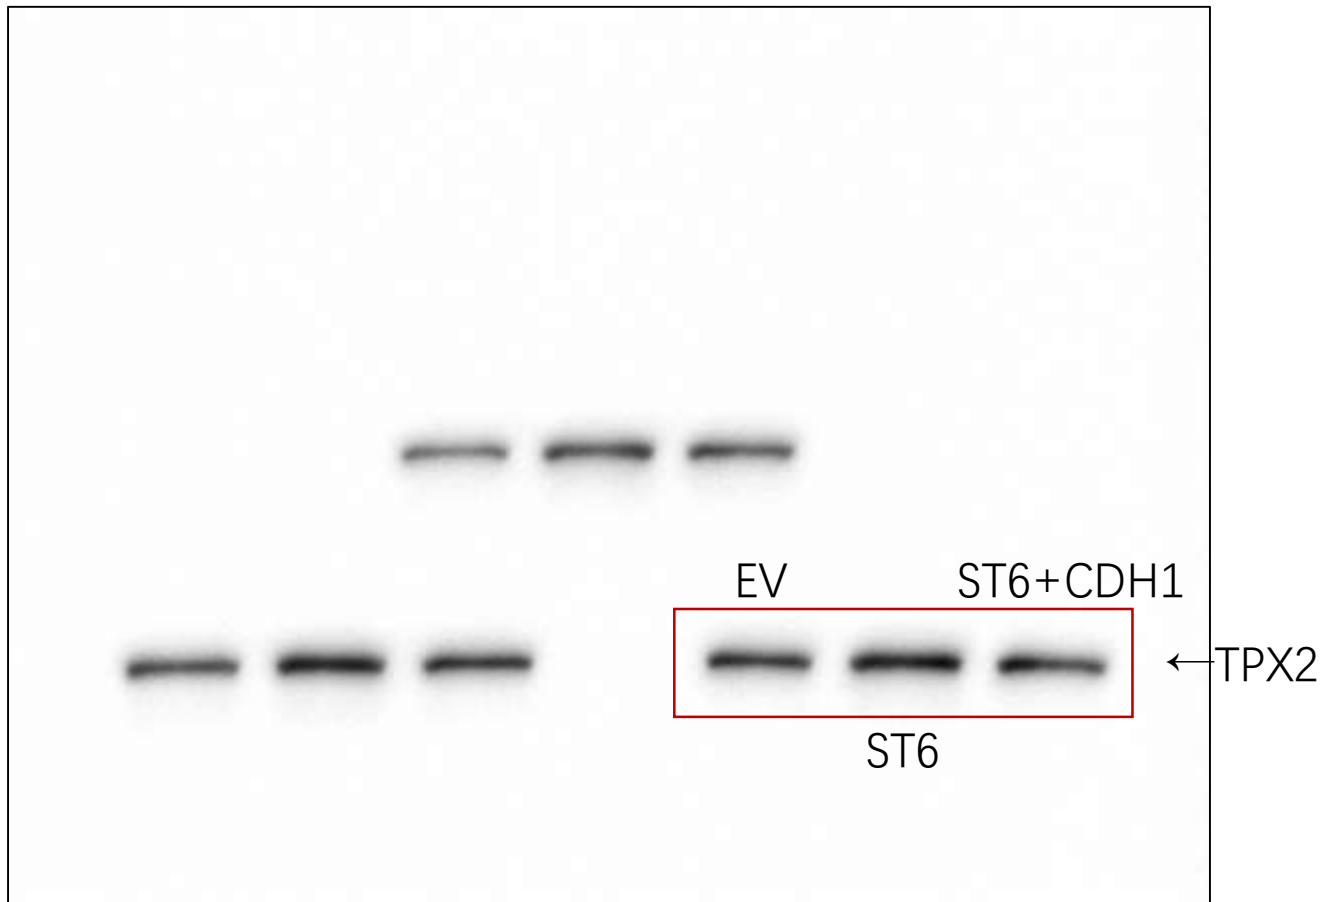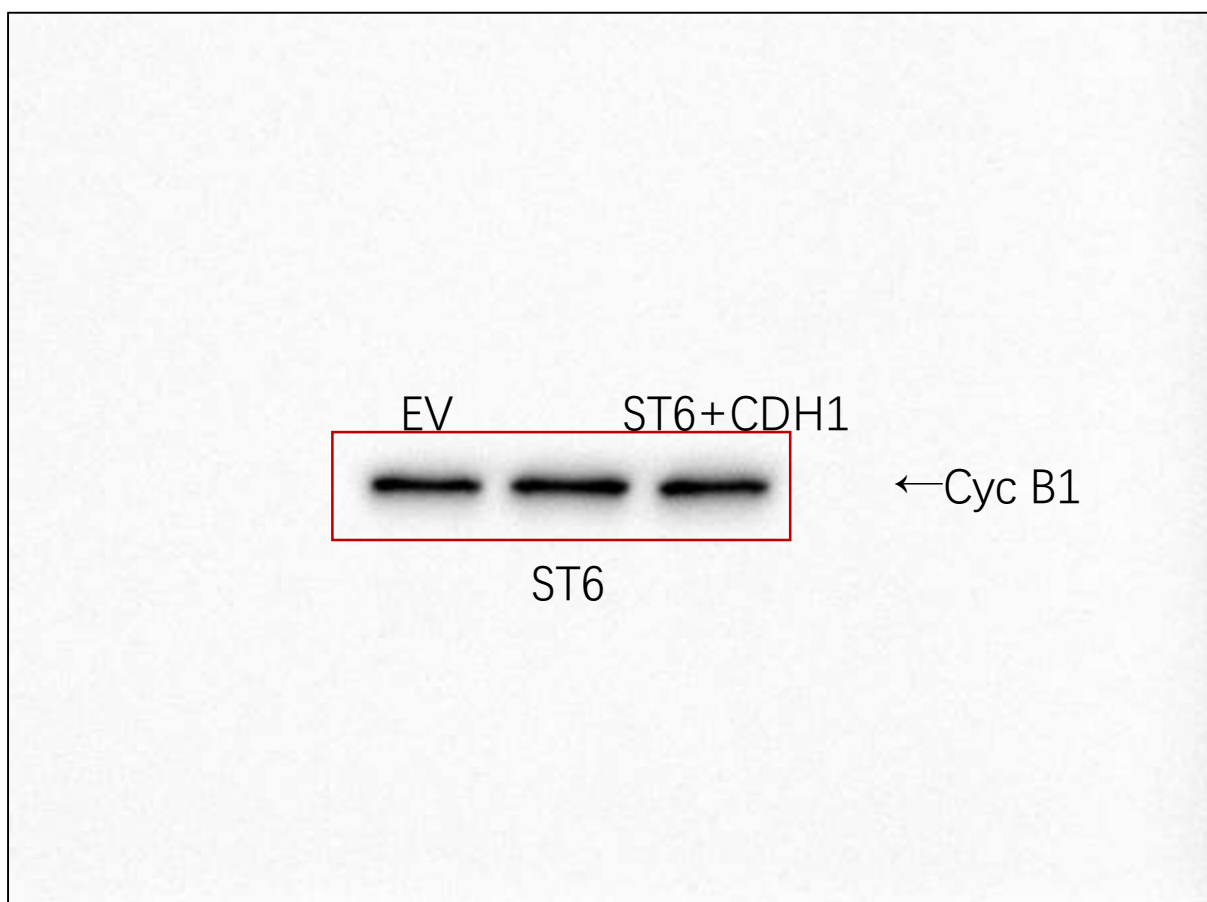



# Original images of western blots of AURKA & AURKB in figure 6a HeLa

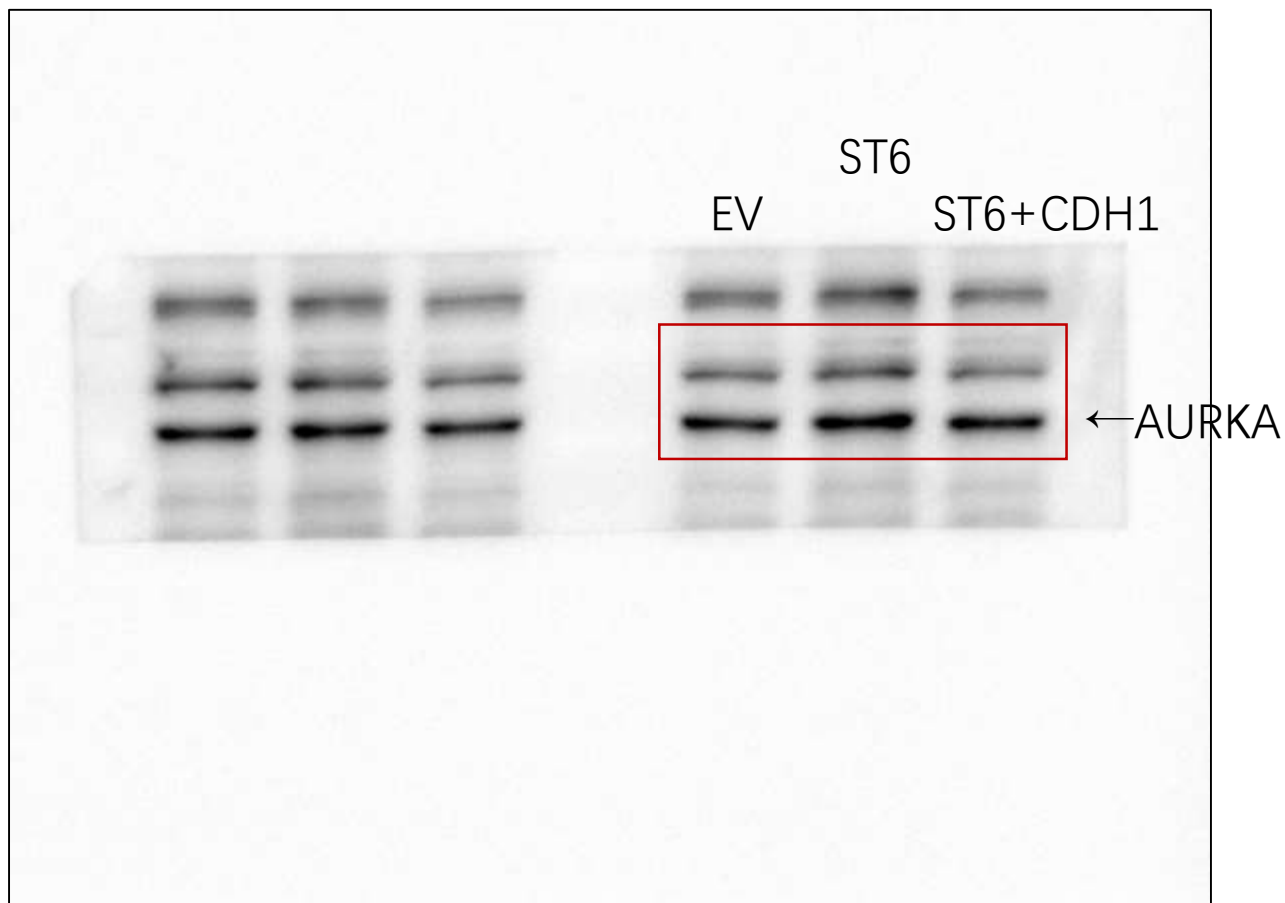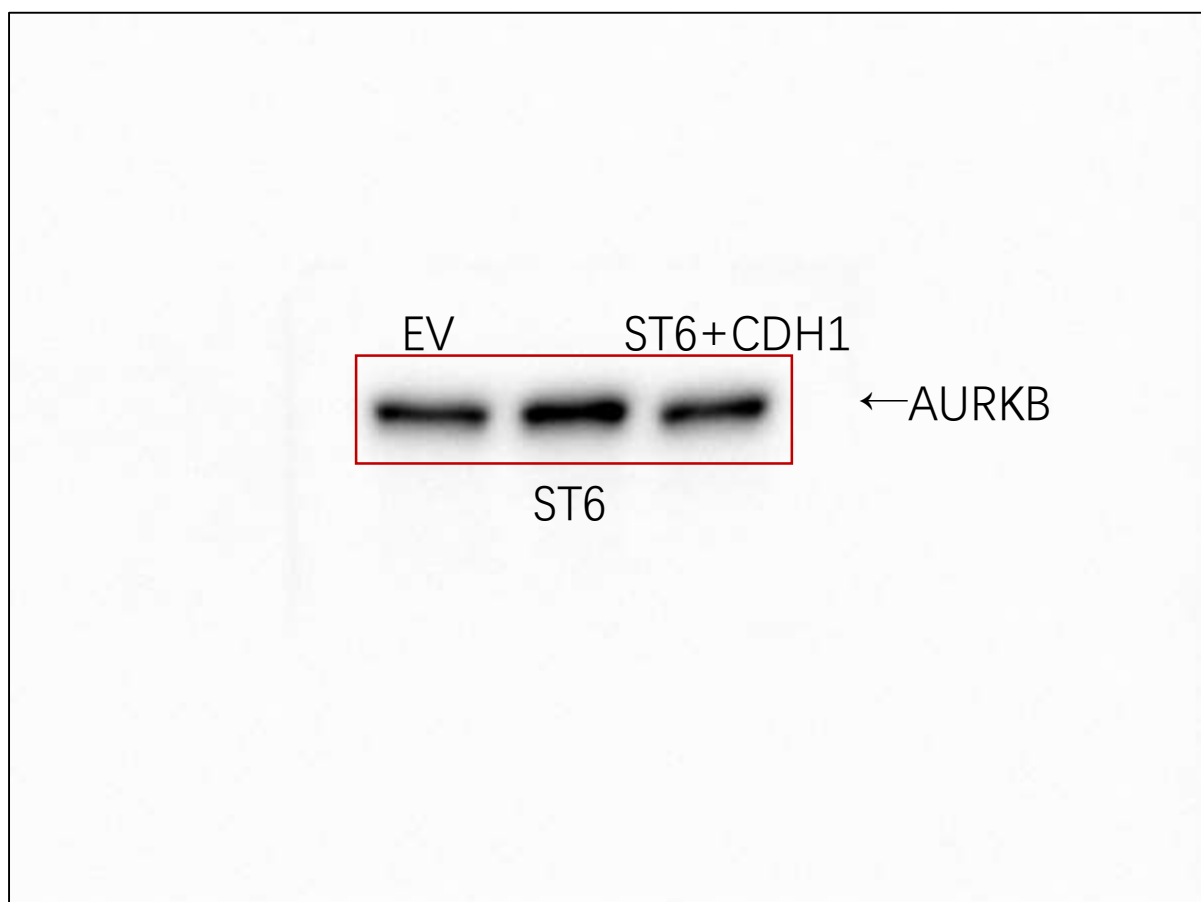

# Original images of western blots of securin & FLAG in figure 6a HeLa

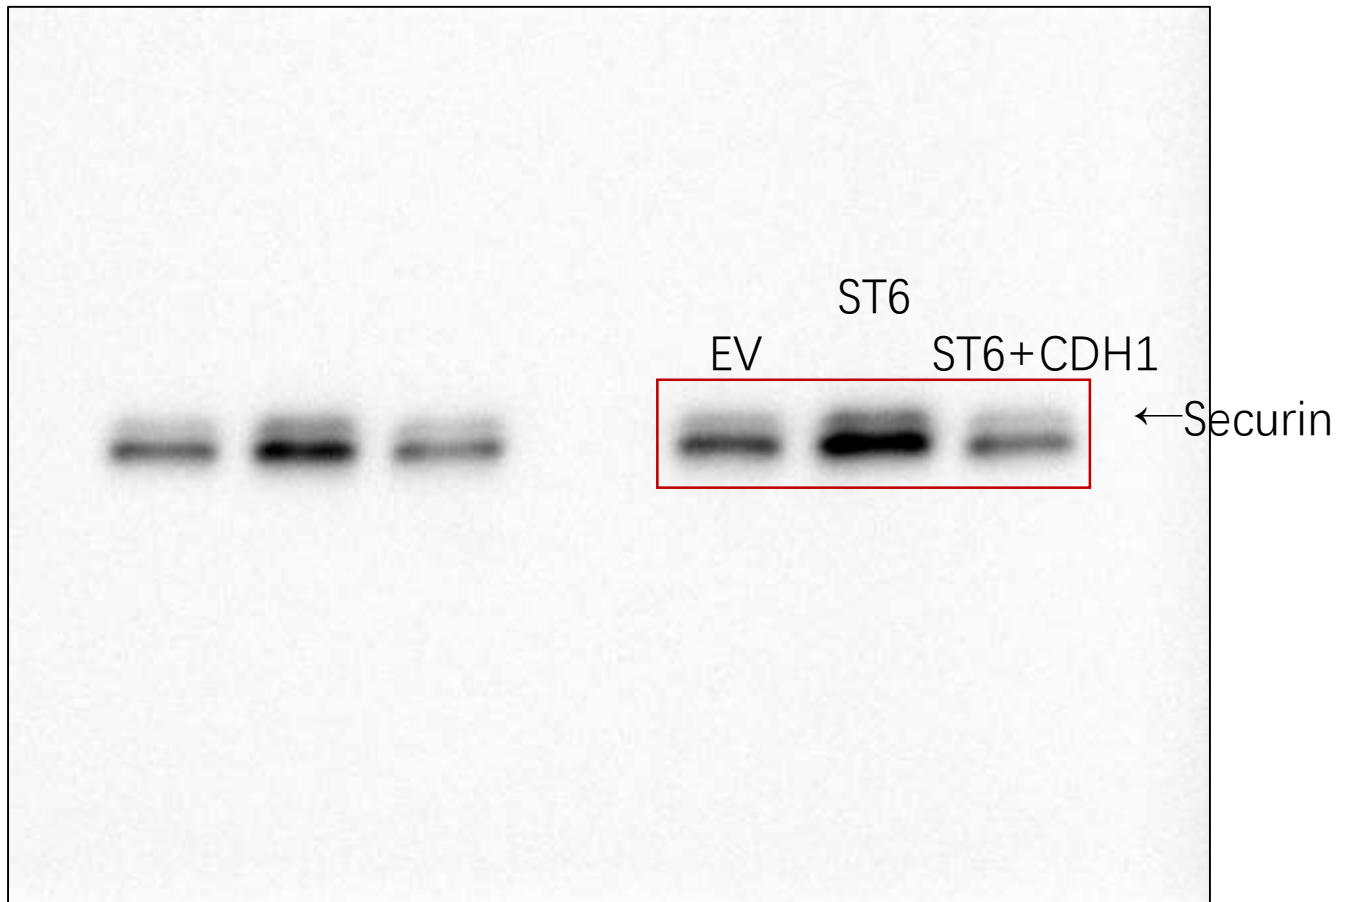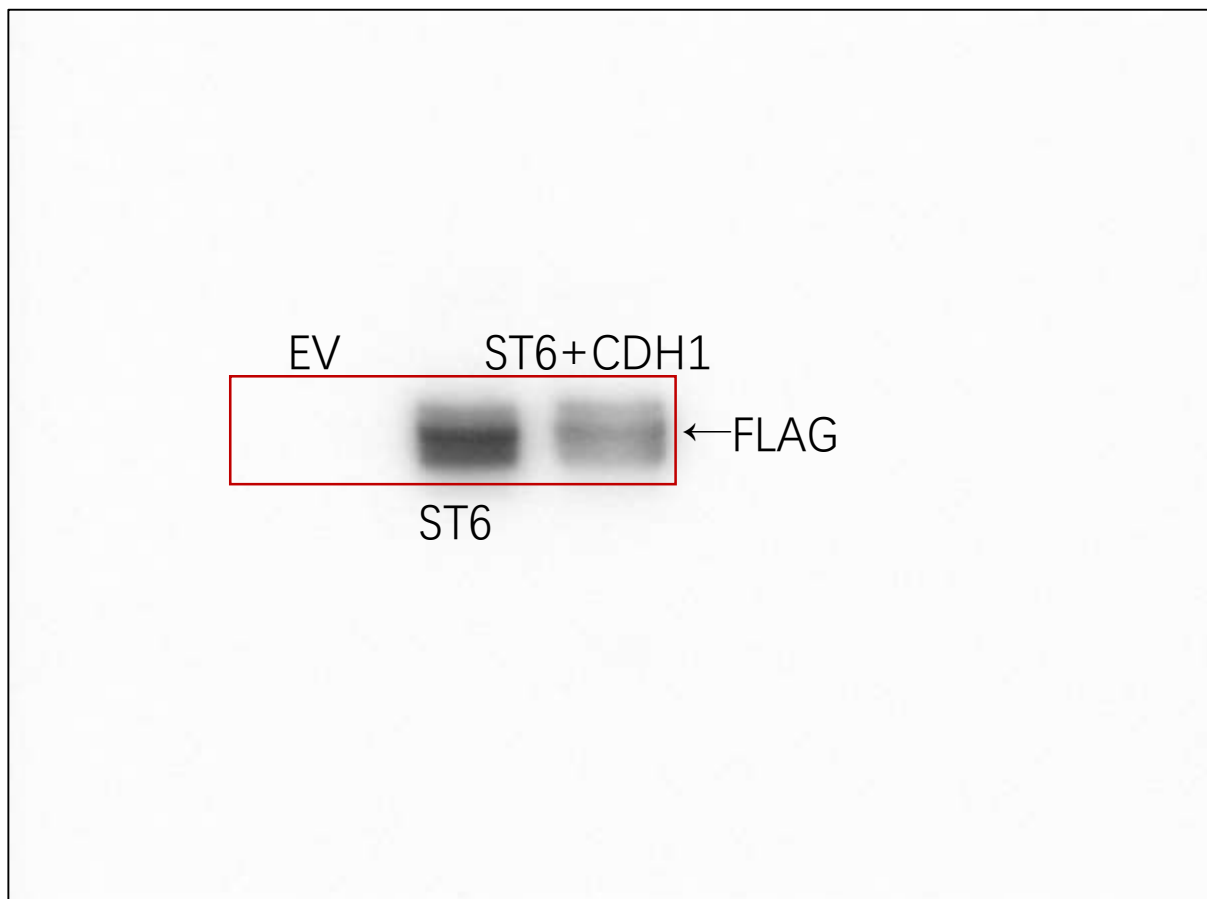

# Original images of western blots of CDH1 & actin in figure 6a HeLa

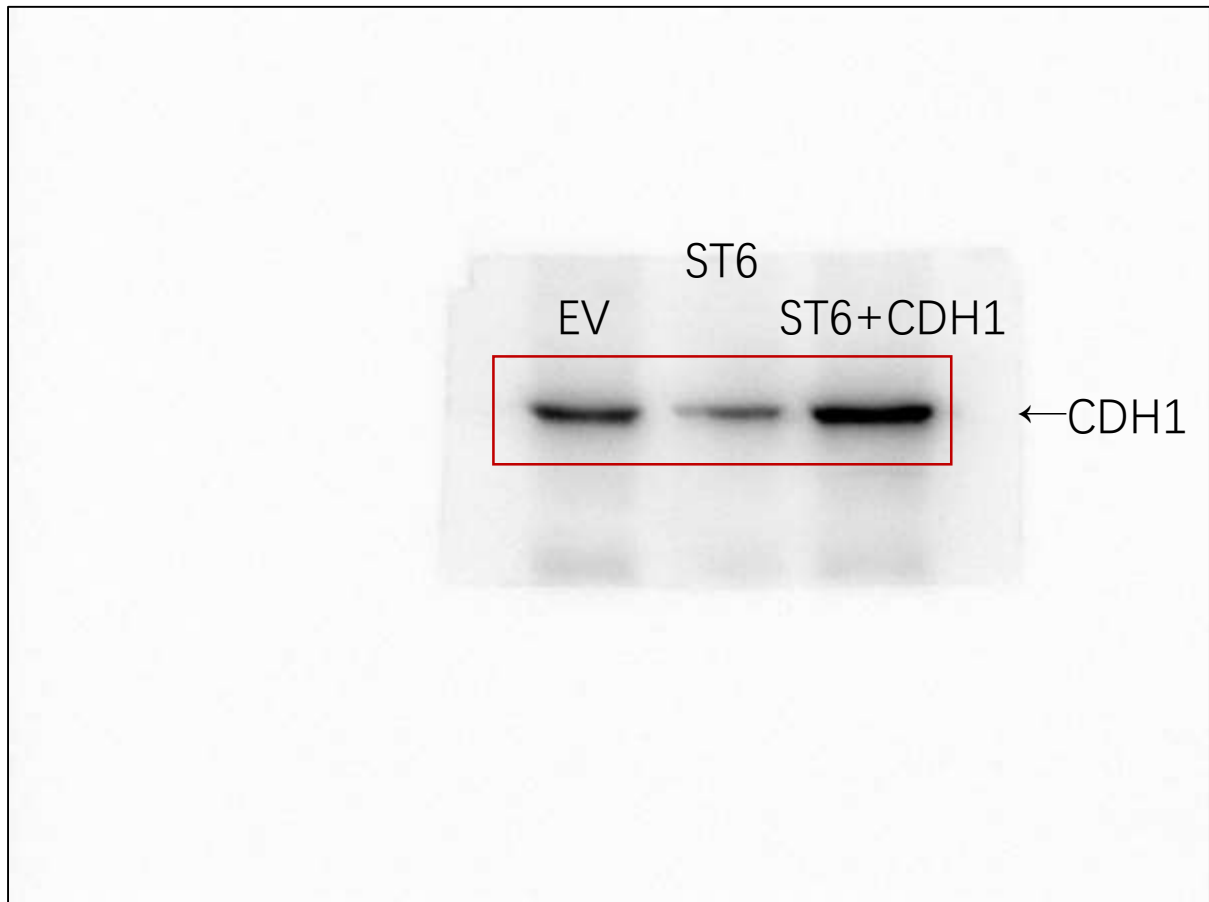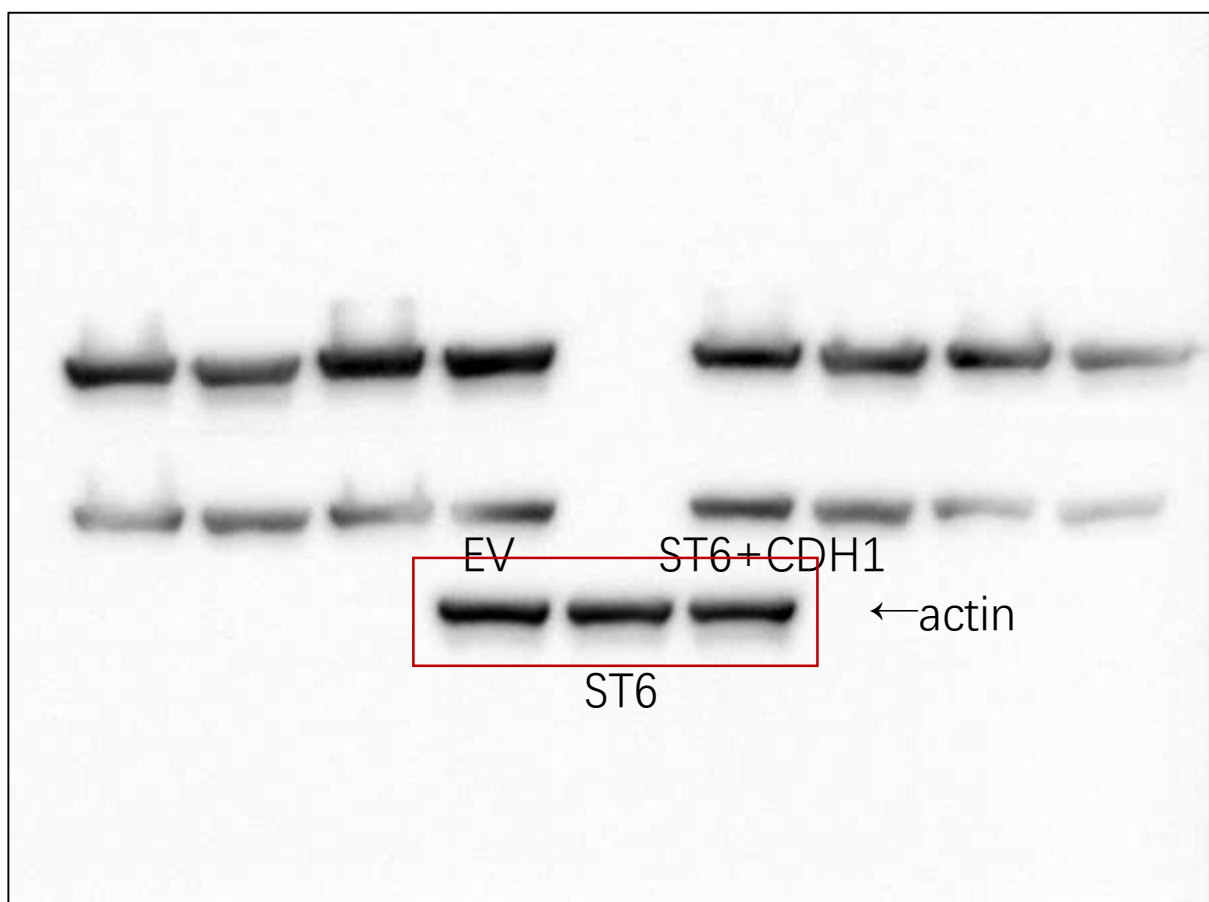

# Original images of western blots of SIRT6 & GAPDH in figure S2

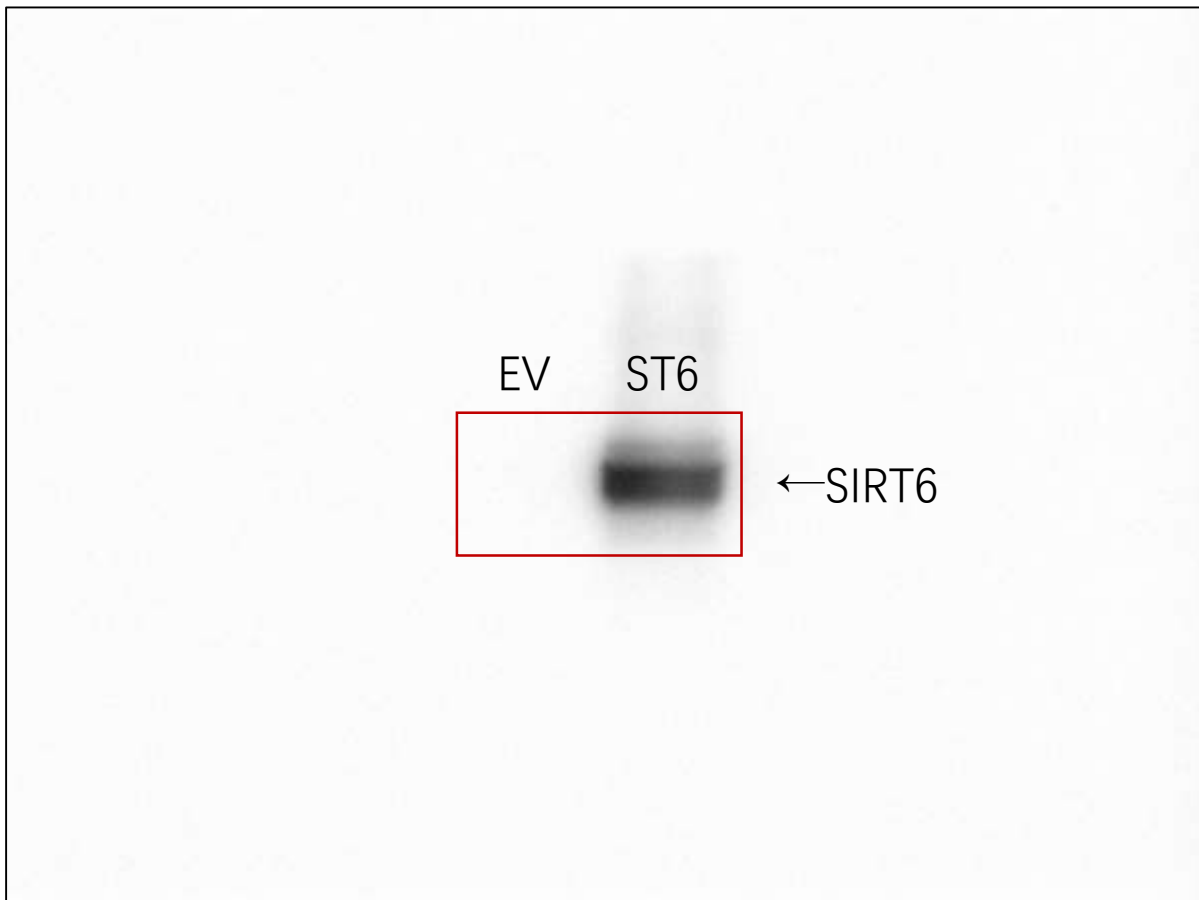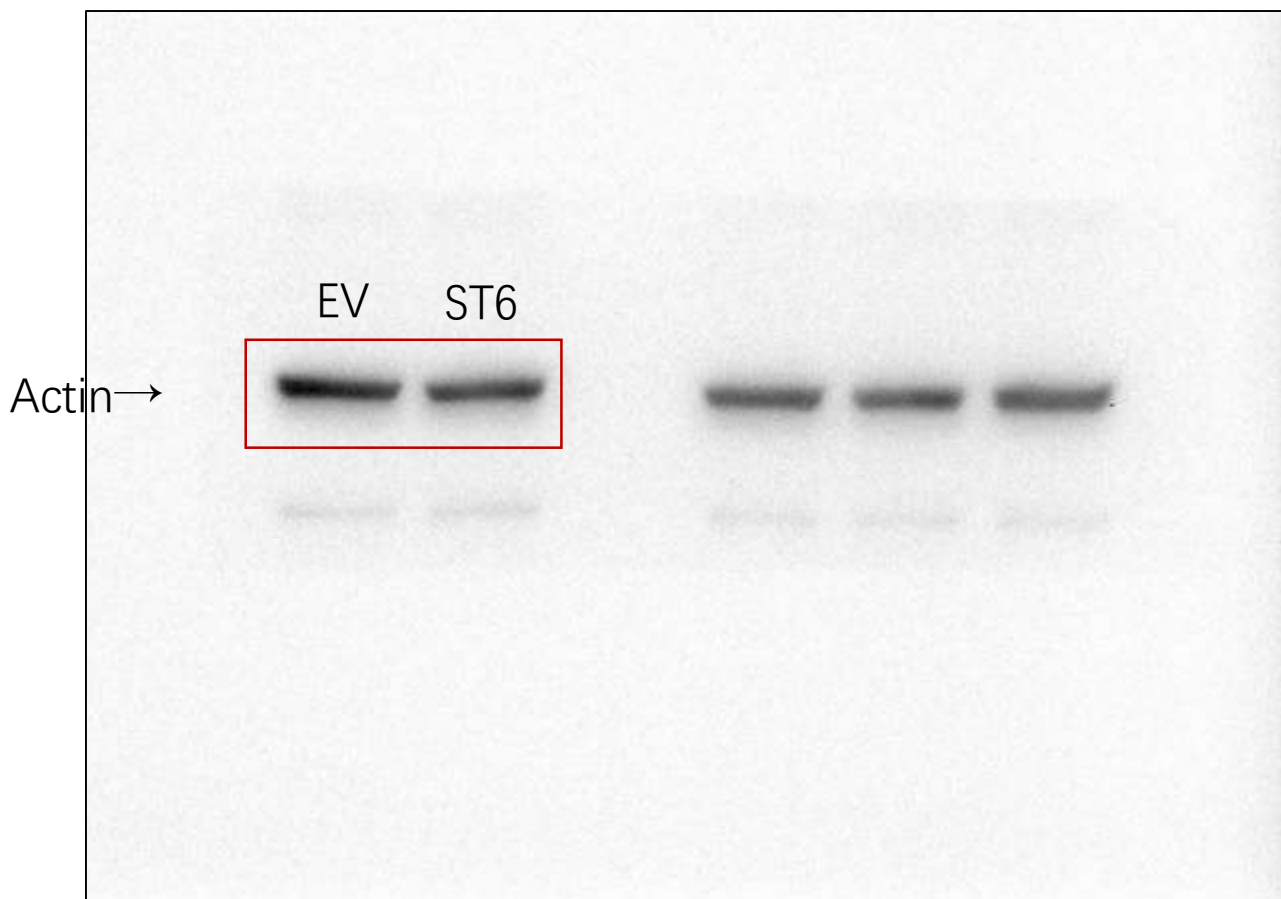

# Original images of western blots of CDC20 & FLAG in figure S7 293T

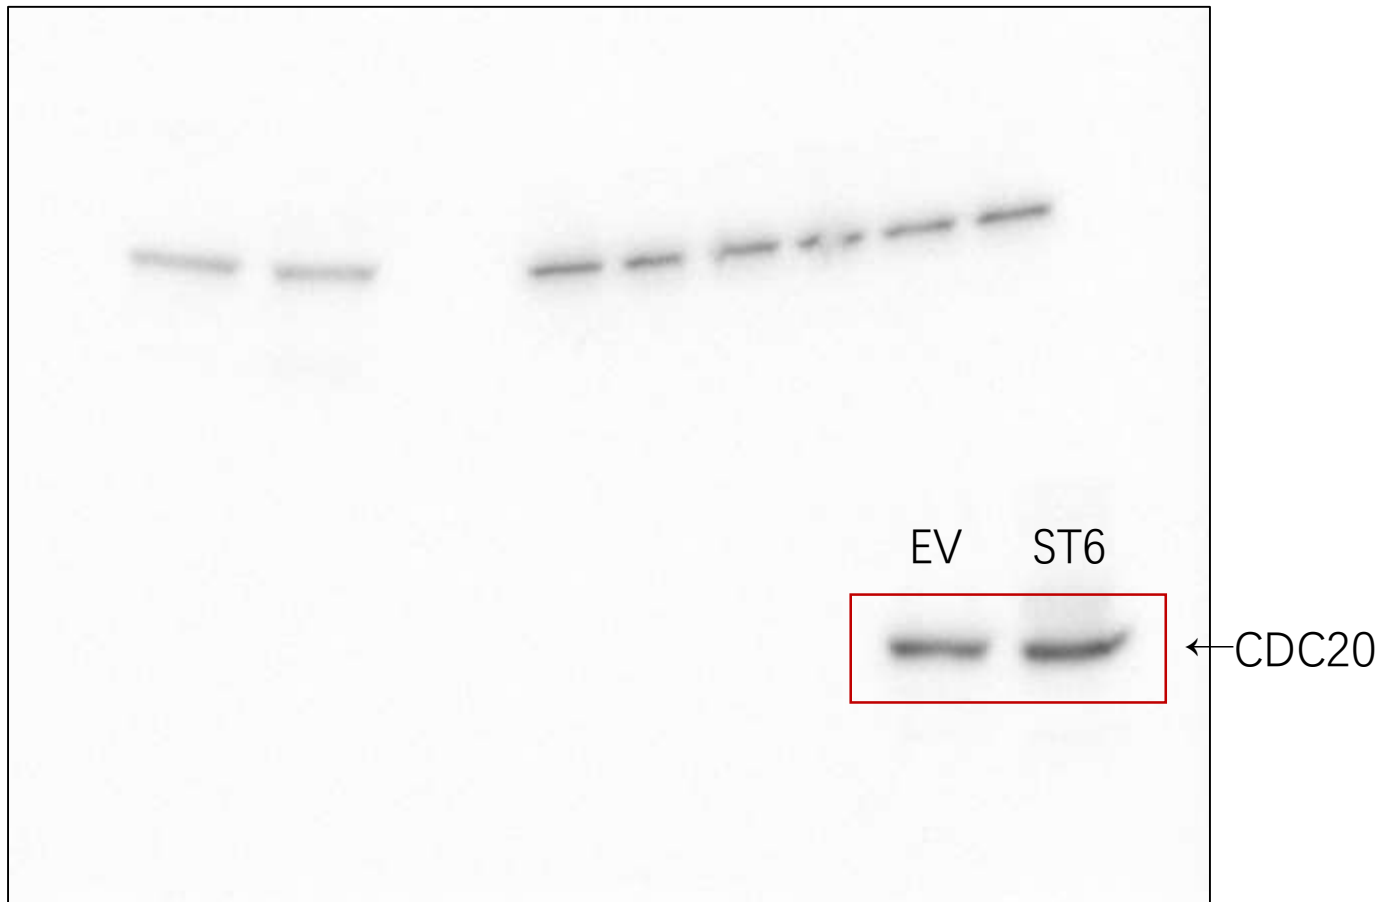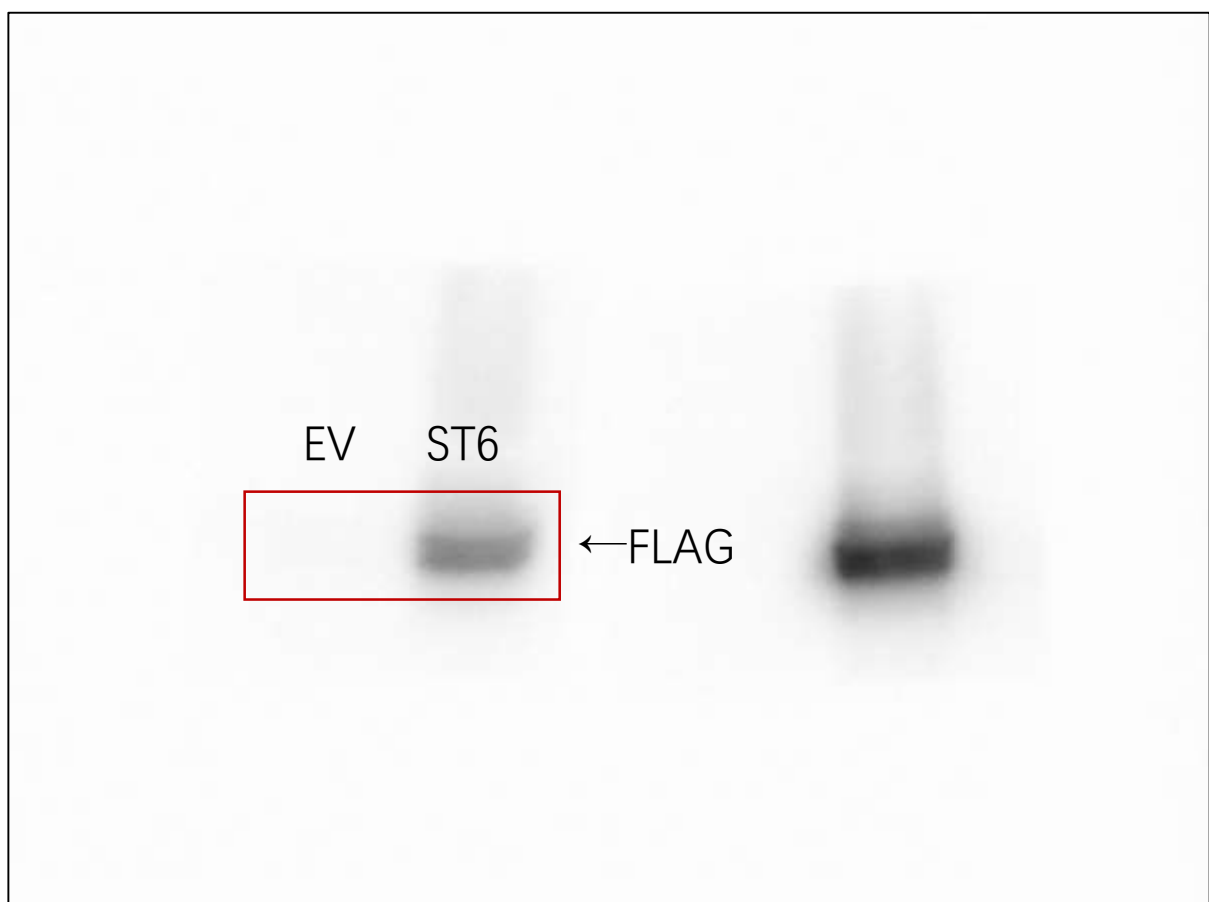

Original images of western blots of actin in figure S7 293T

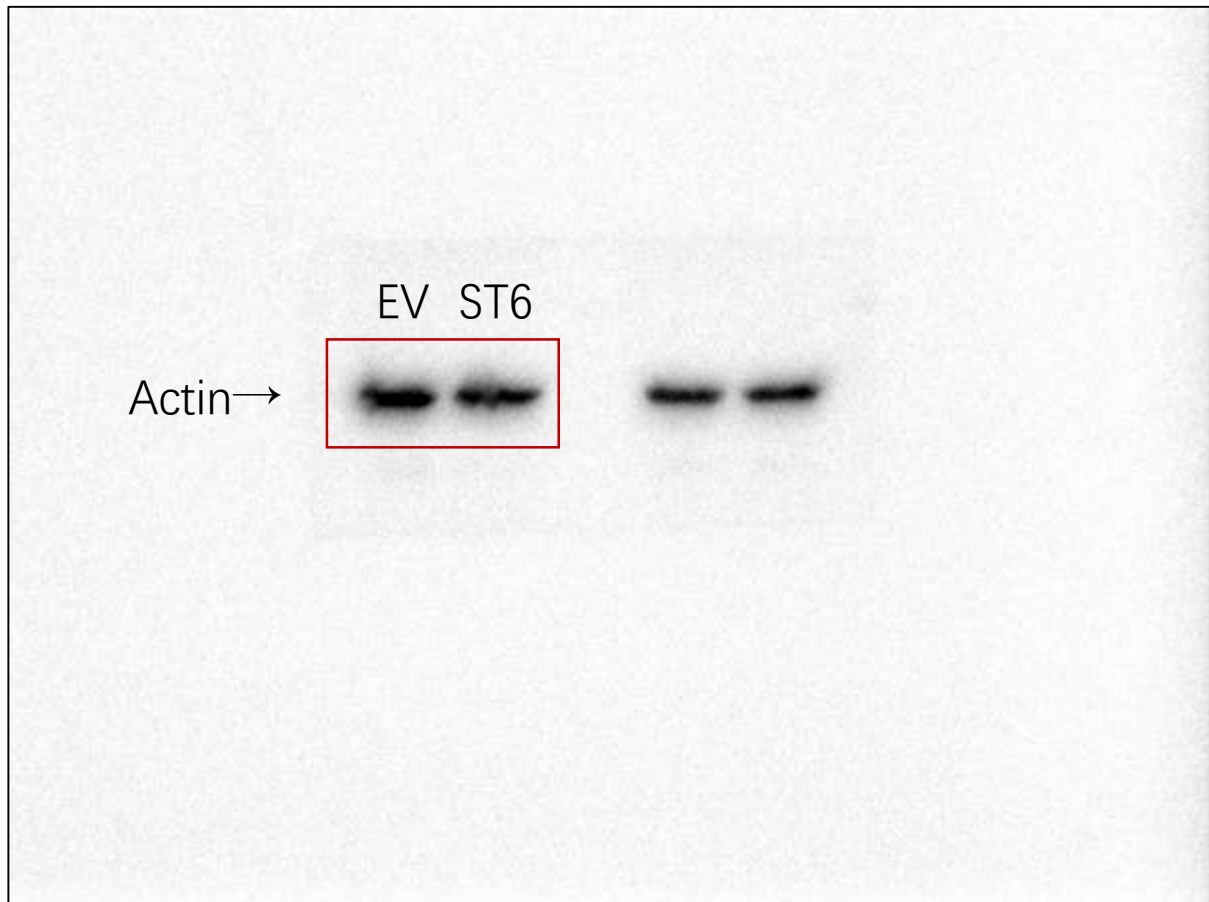

# Original images of western blots of CDC20 & FLAG in figure S7 HeLa

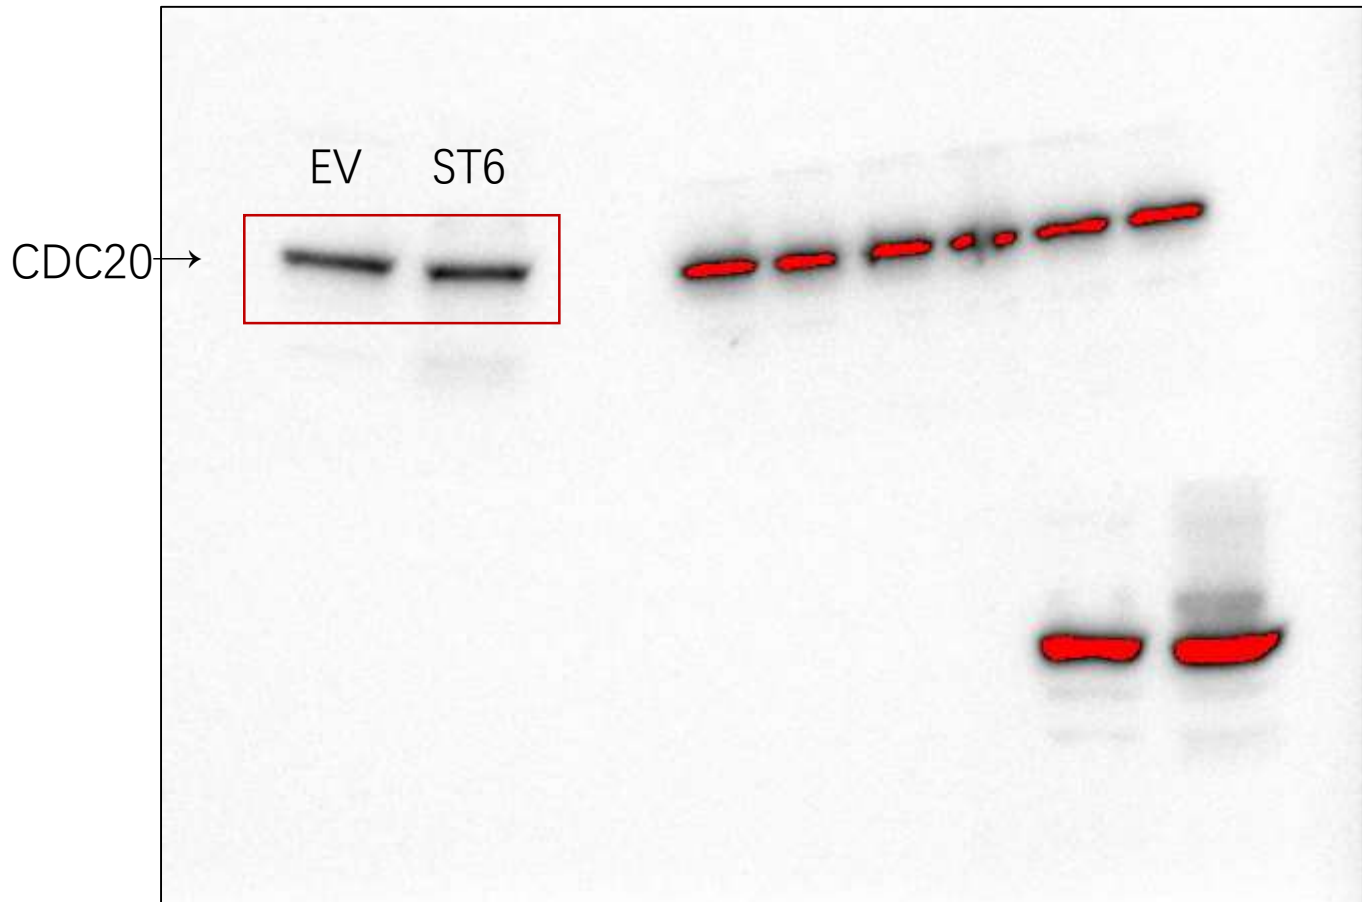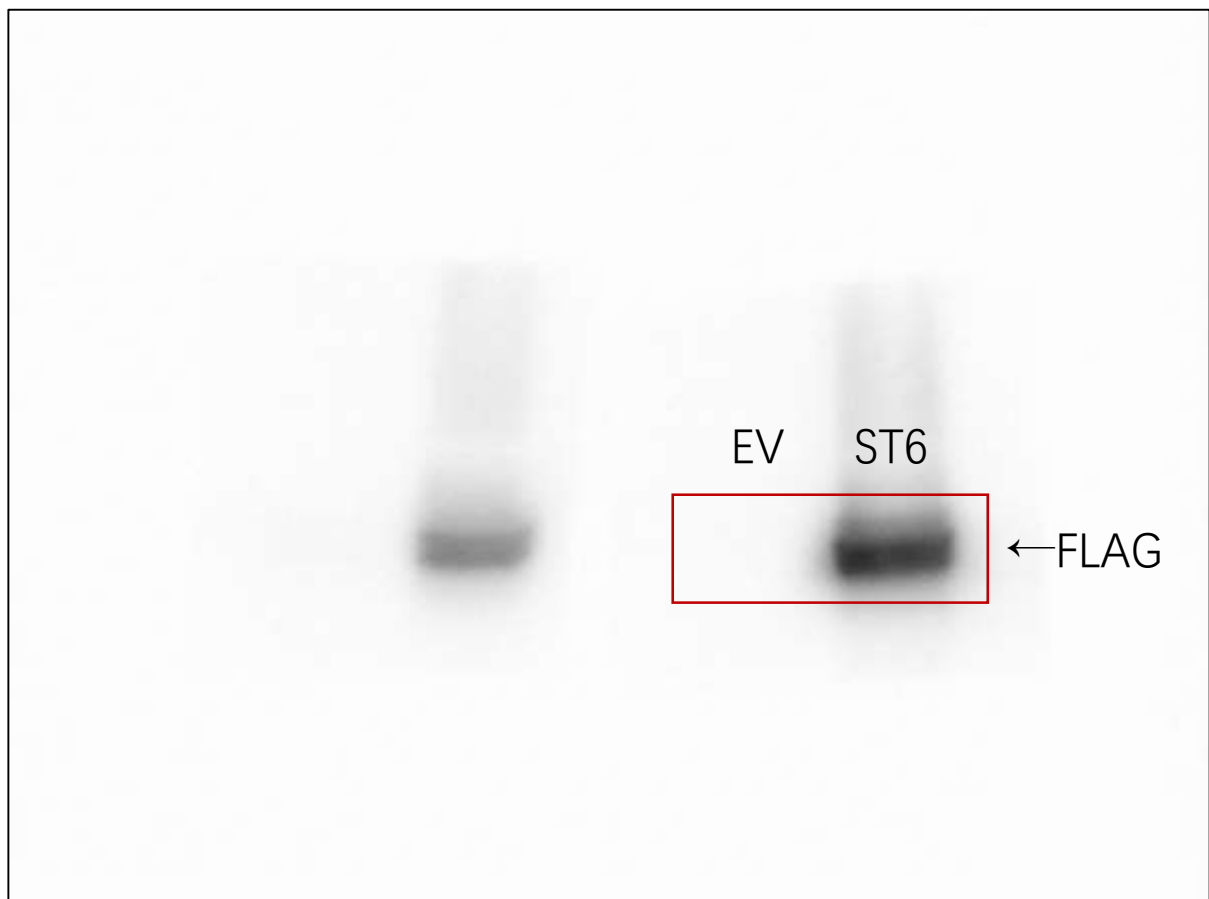

# Original images of western blots of Actin in figure S7 HeLa

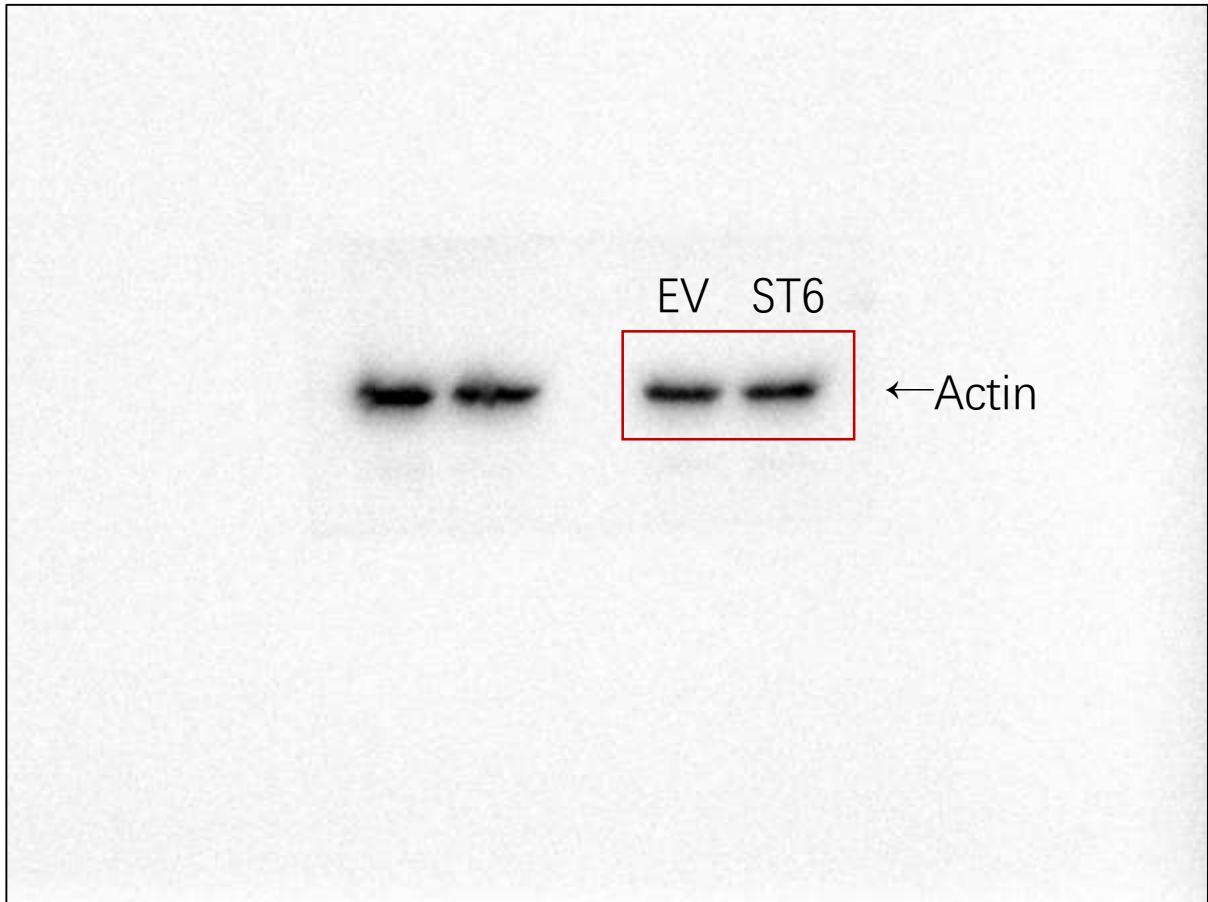



Original images of western blots of CDC20 & SIRT6 in figure S8 293T

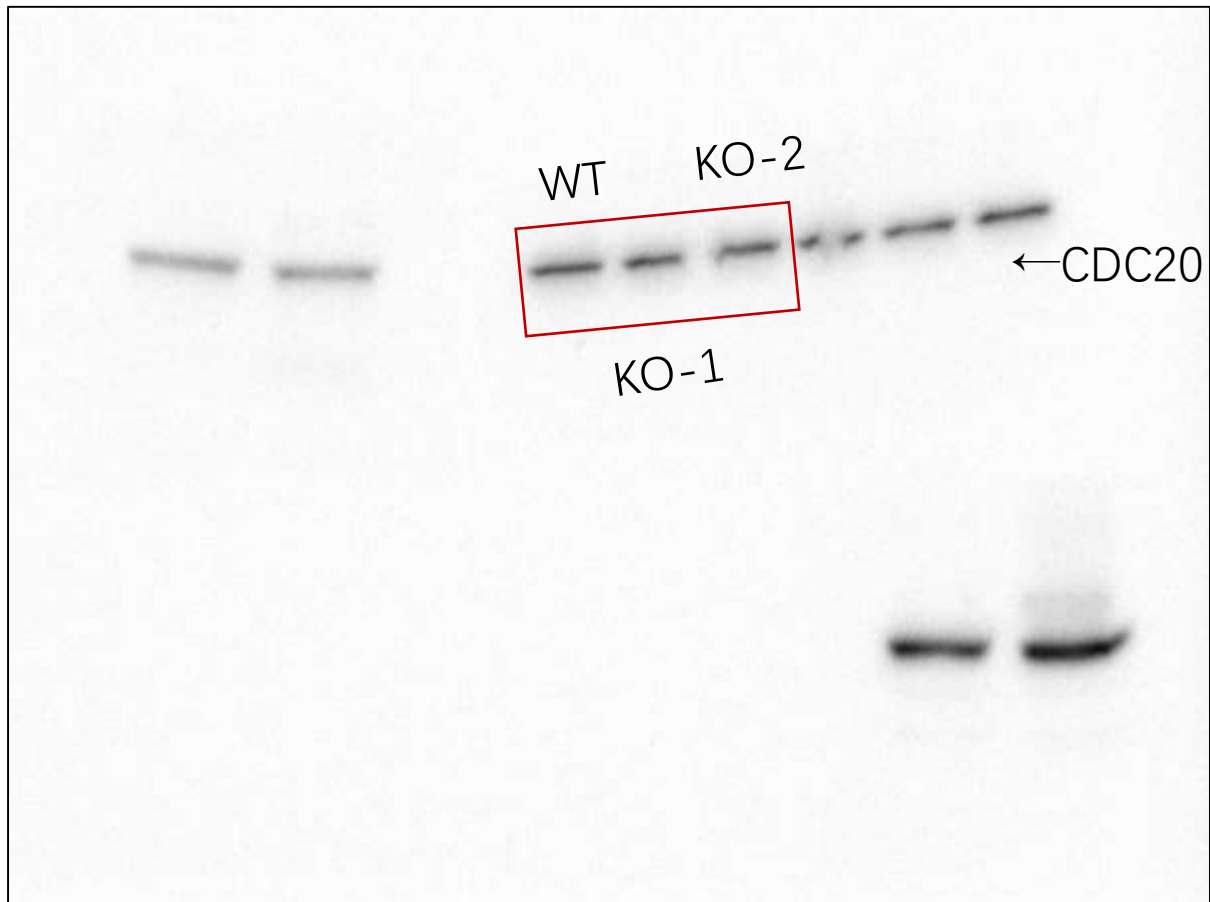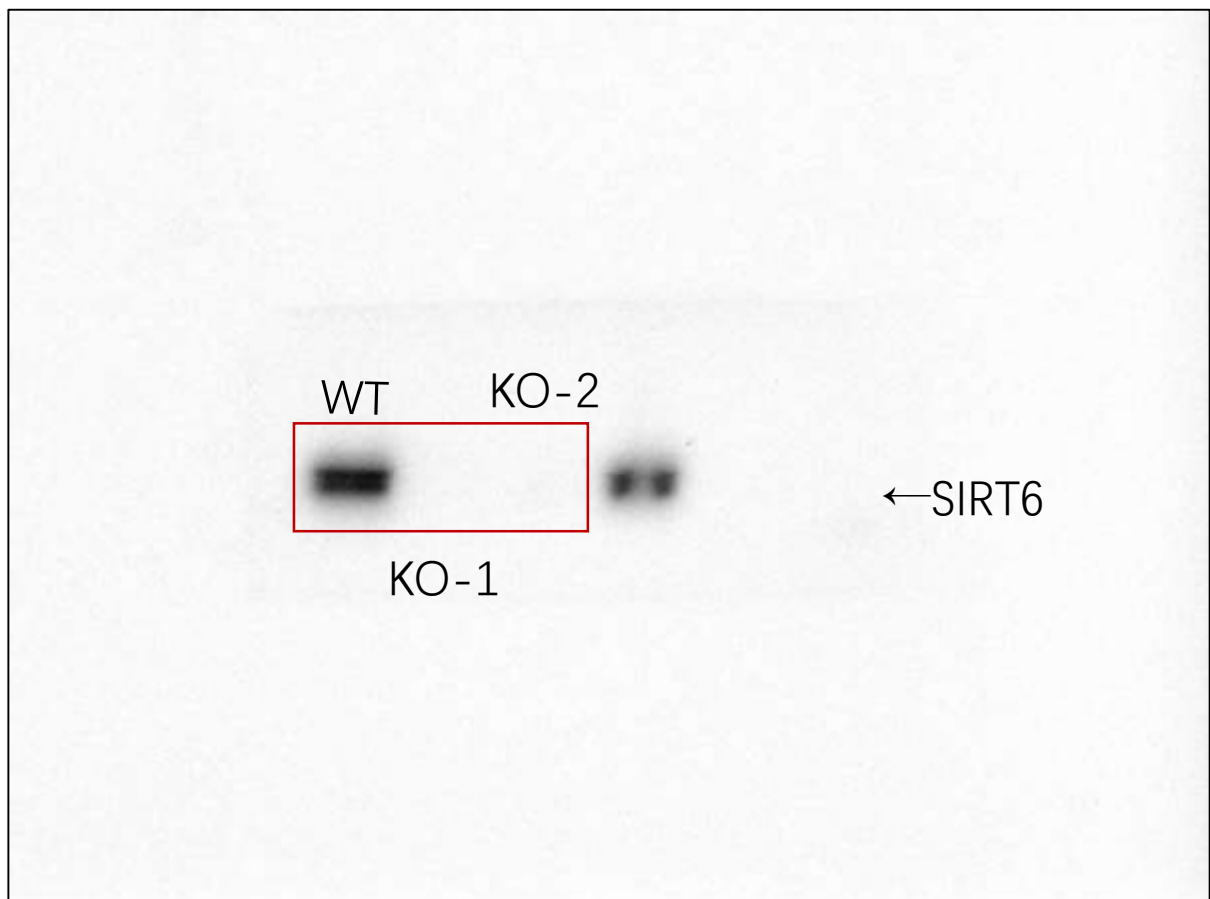

# Original images of western blots of actin in figure S8 293T

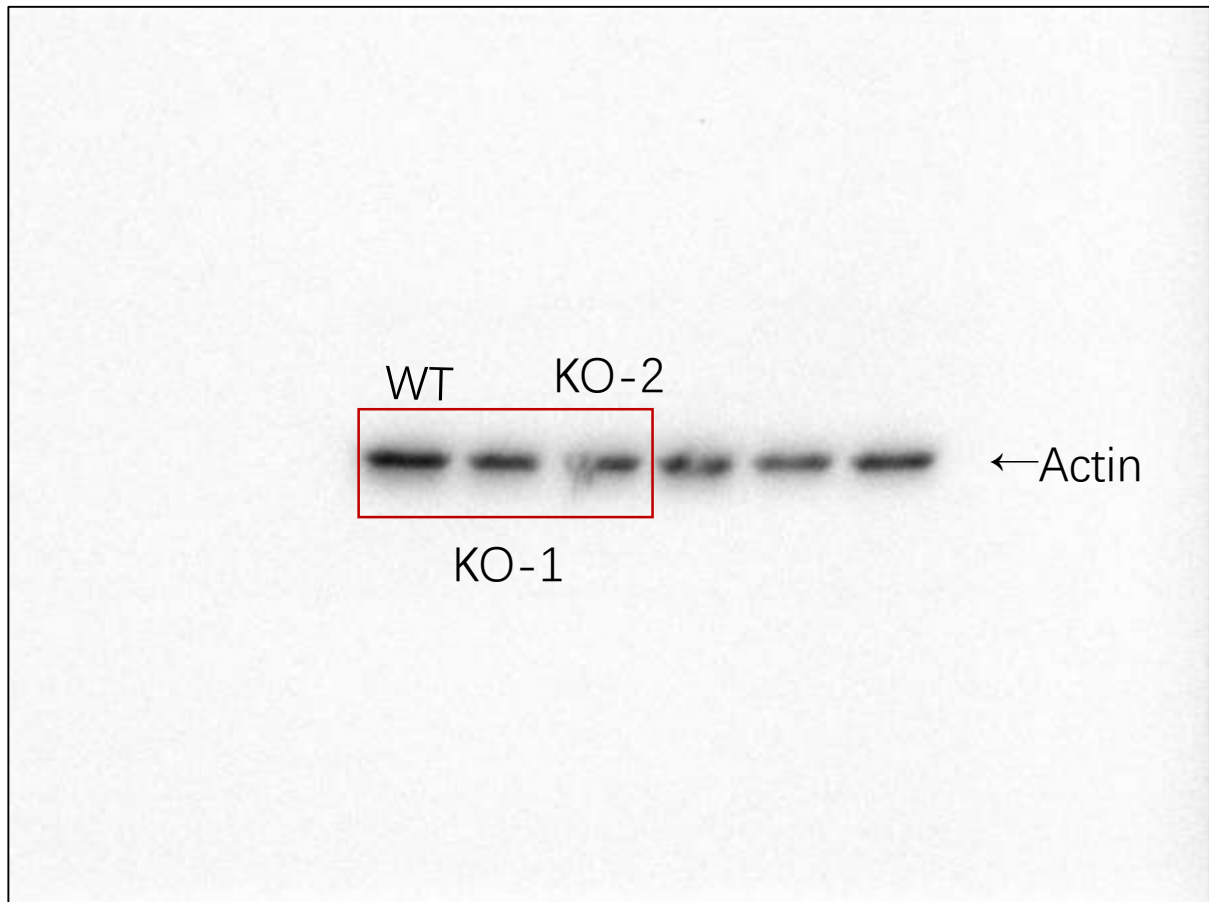

# Original images of western blots of CDC20 & SIRT6 in figure S8 HeLa

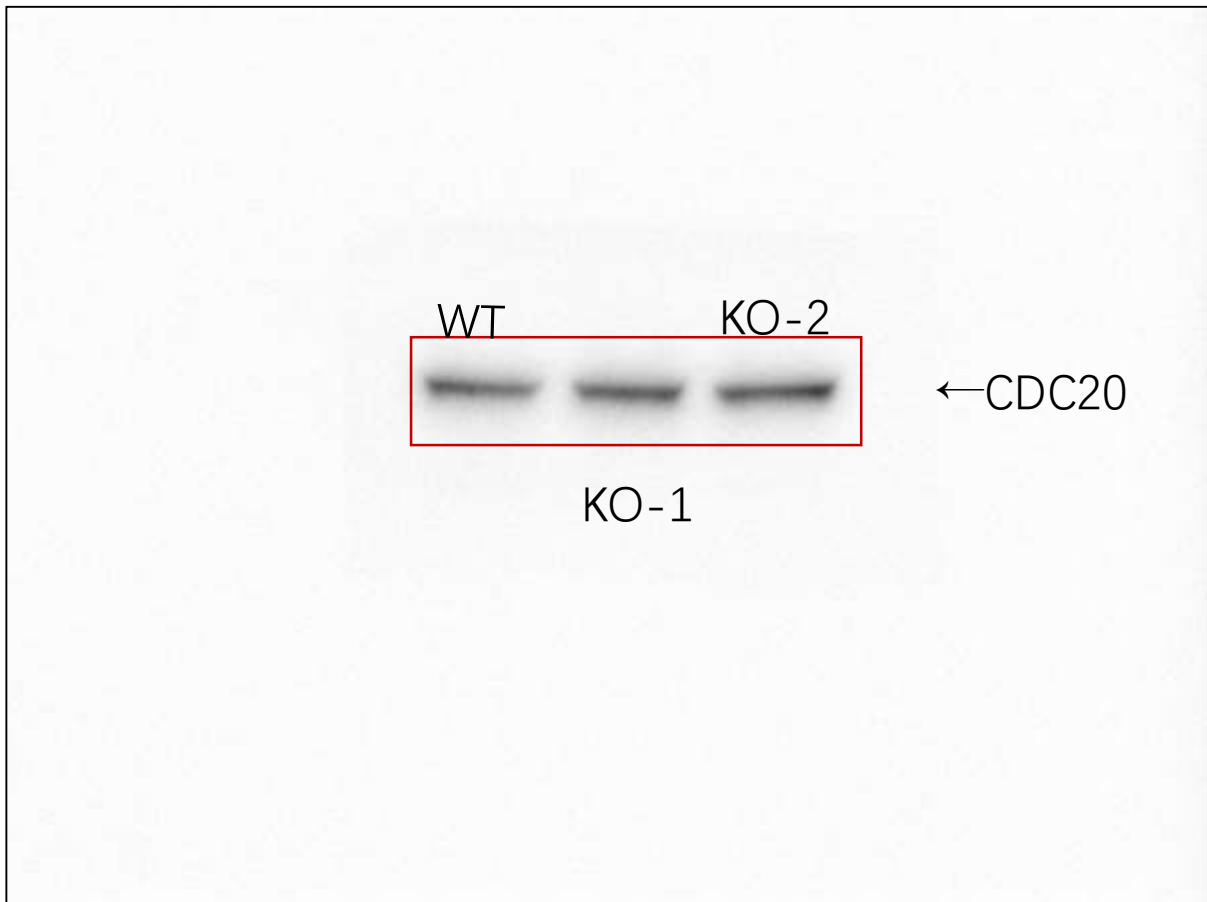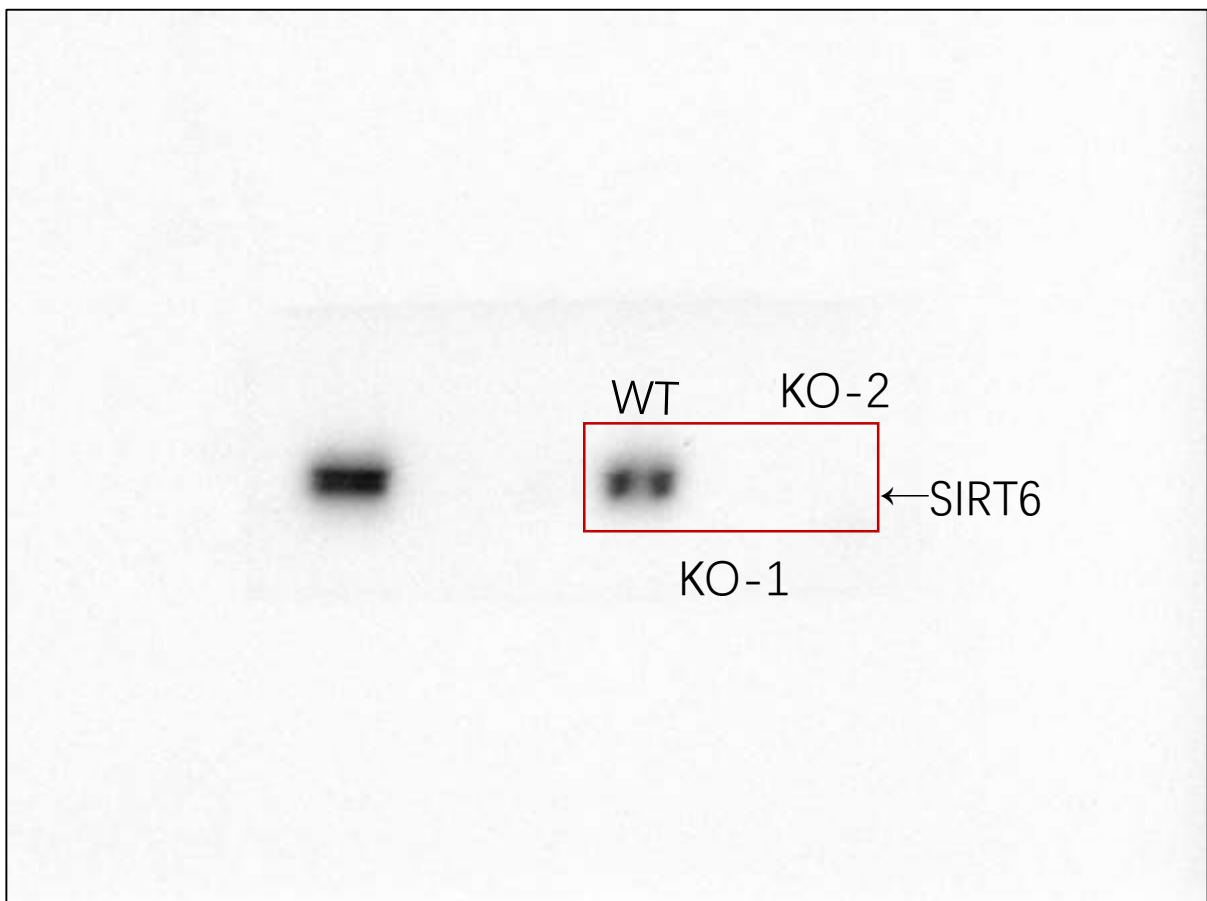

Original images of western blots of actin in figure S8 293T

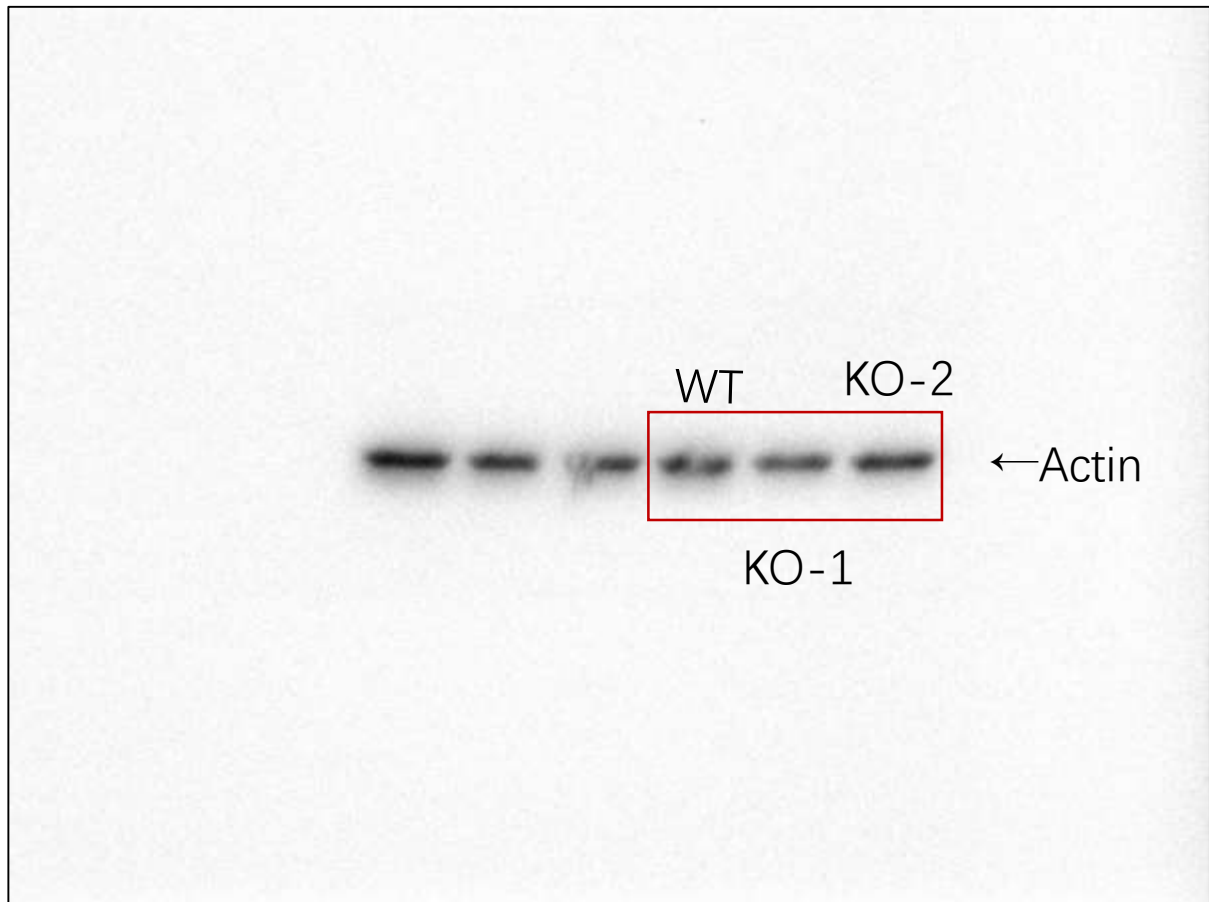

# Original images of western blots of CDH1 & FLAG in figure S9

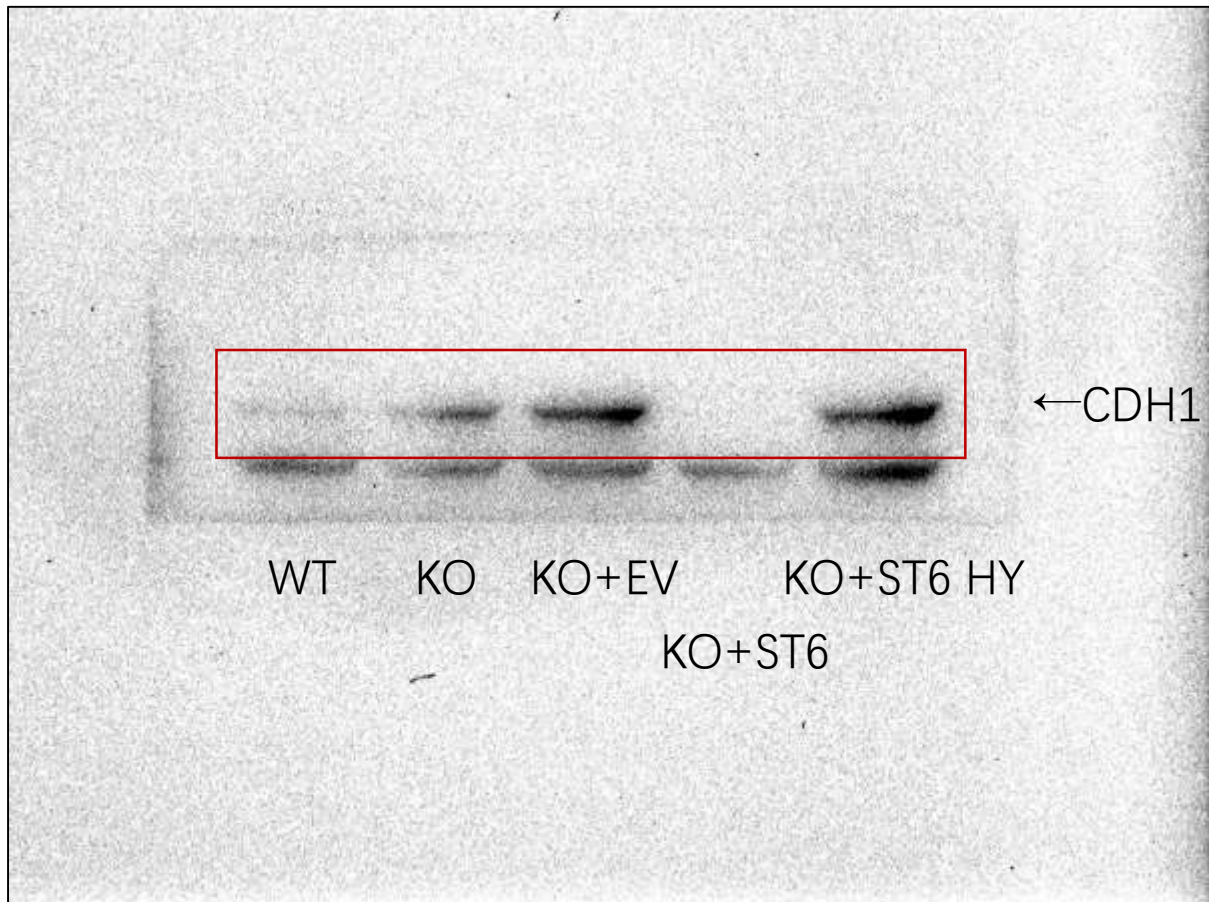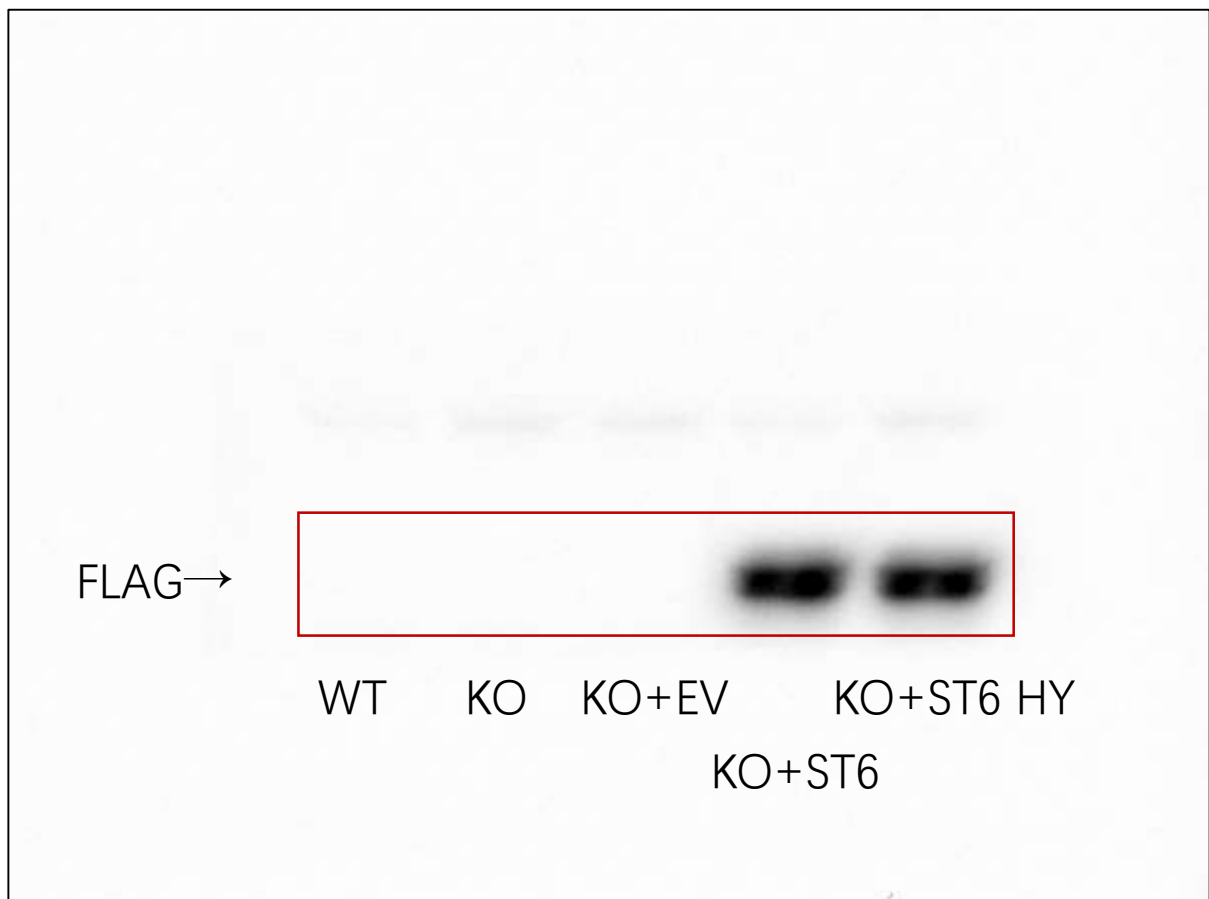

# Original images of western blots of CDH1 & FLAG in figure S9

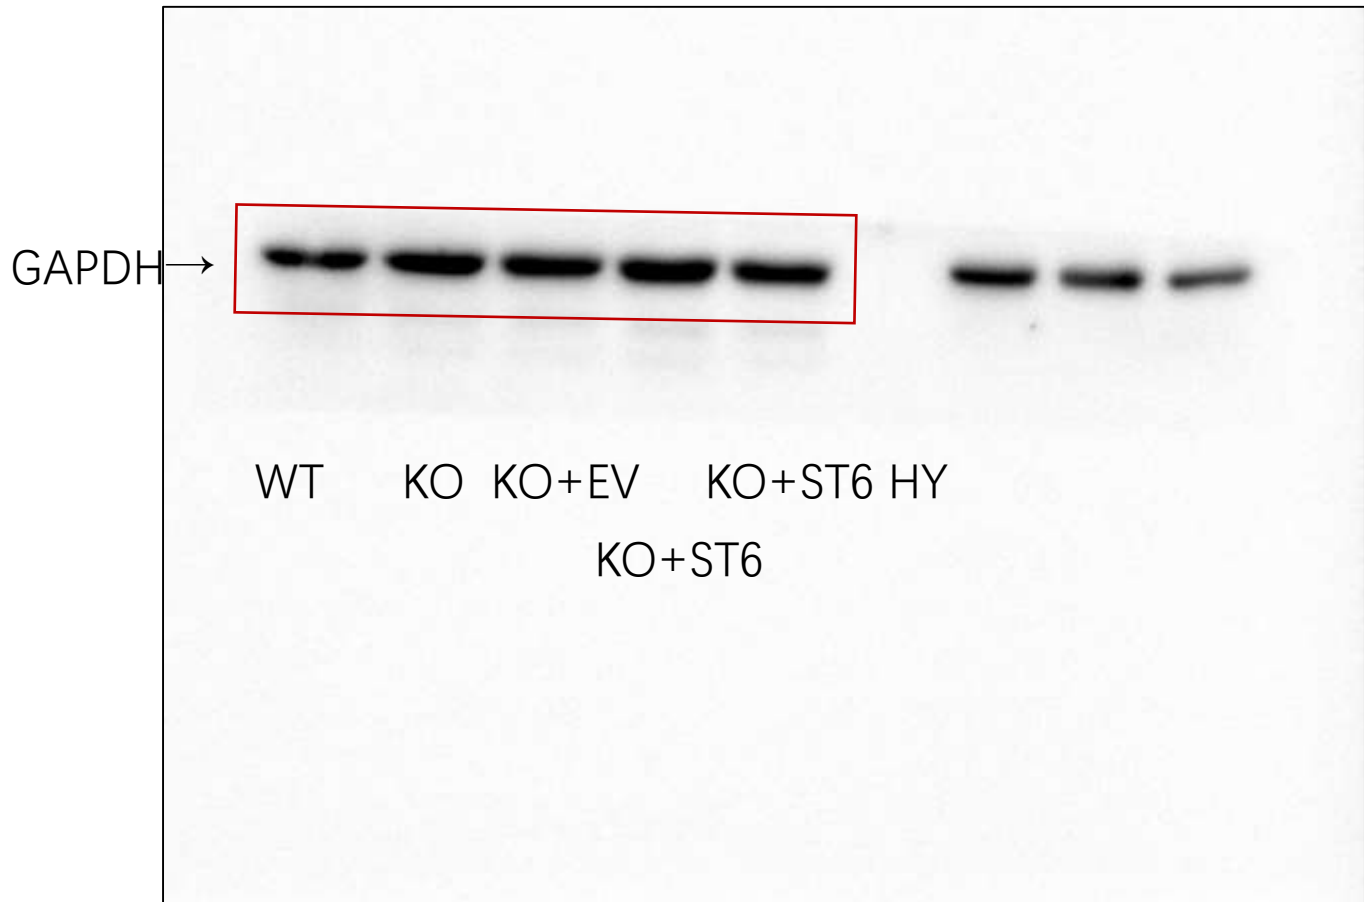

# Original images of western blots of HA & FLAG in figure S12

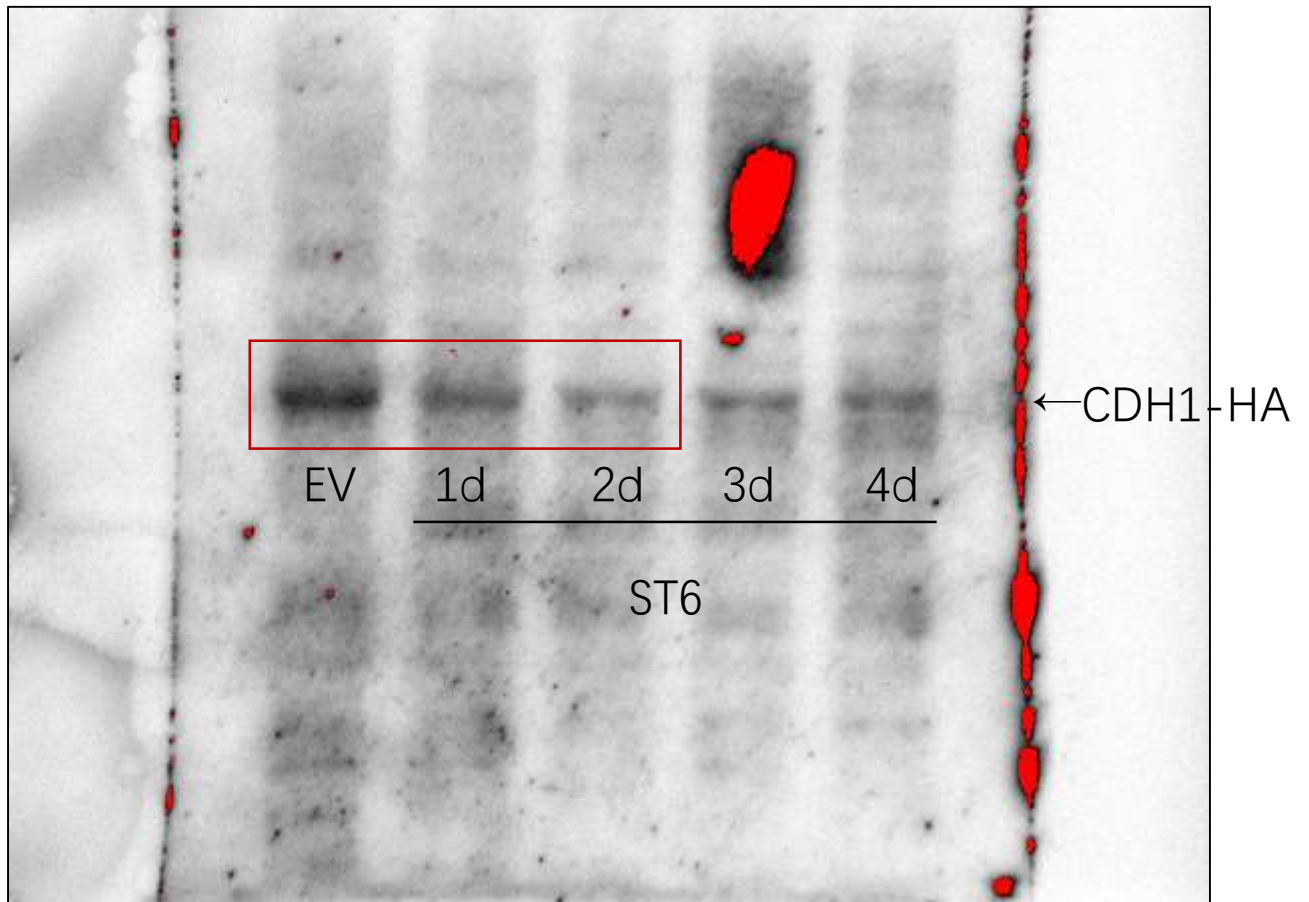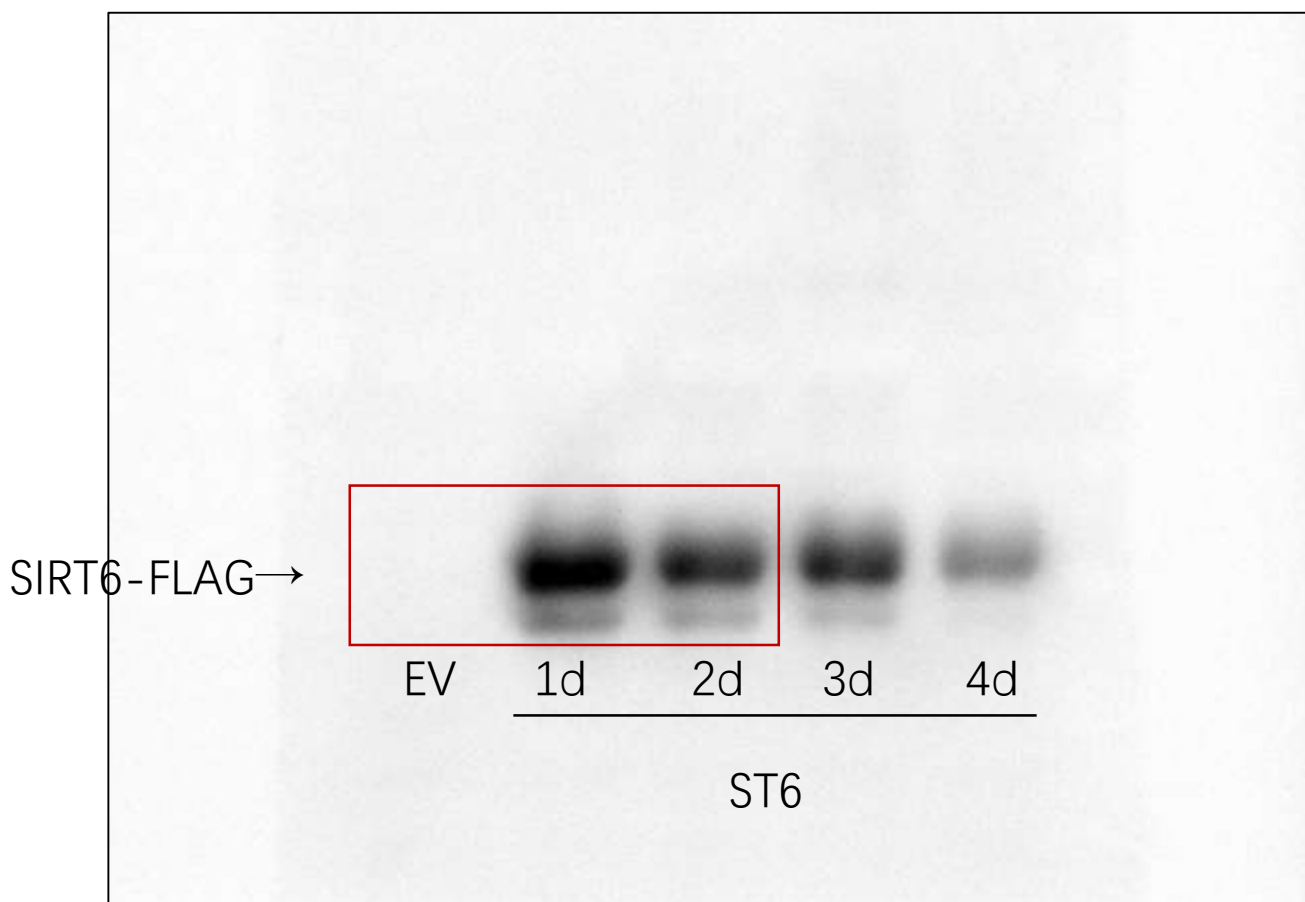

# Original images of western blots of actin in figure S12

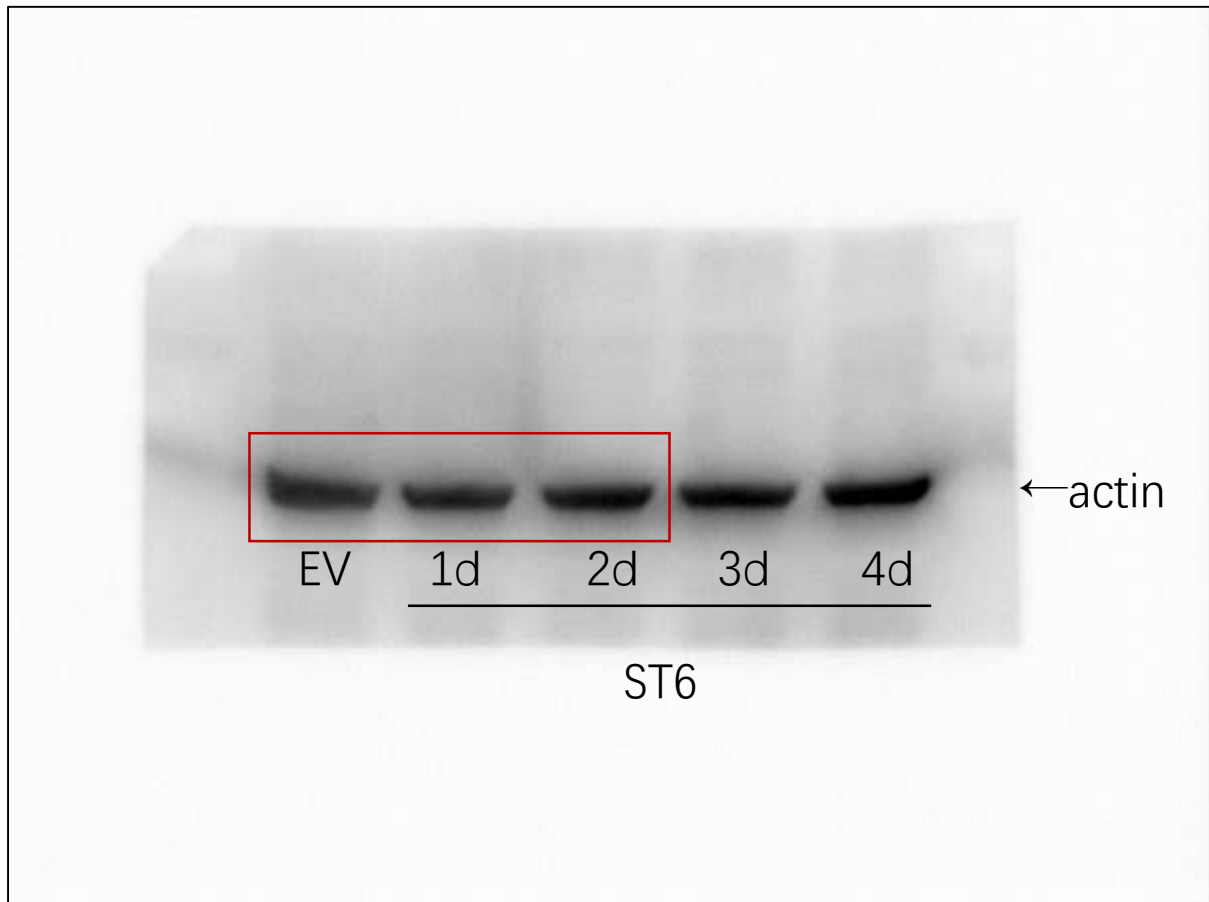

Supplement: 41598_2021_93684_MOESM1_ESM.pdf [file 41598_2021_93684_MOESM1_ESM.pdf]
